# Supplementary material
Source: publisher figshare collection journal article supplement (https://rs.figshare.com/ndownloader/files/13001774)
Supplement: Supplementary file 1 [file 13001774]

## Sheet: CHIKV
IAB-AMØ-1410 Metabolic Model		Mean of constrained CHIKV optima (% unconstrained CHIKV optima) results for in silico media metabolite alterations, through additional constraints on metabolite-associated exchange reactions																					Standard deviation of constrained CHIKV optima (% unconstrained CHIKV optima) results for in silico media metabolite alterations, through additional constraints on metabolite-associated exchange reactions
Reaction ID		arg-L	but	glc	gln-L	hco3	his-L	ile-L	leu-L	lys-L	met-L	o2	ocdca	ocdcea	phe-L	pi	pyr	thr-L	trp-L	ttdca	val-L		arg-L	but	glc	gln-L	hco3	his-L	ile-L	leu-L	lys-L	met-L	o2	ocdca	ocdcea	phe-L	pi	pyr	thr-L	trp-L	ttdca	val-L
10FTHF5GLUtl		1	1	1	0.987656	1	0.764569	0.680027	0.848627	0.598473	0.594647	0.909091	0.954545	0.954545	0.580073	0.909091	1	0.540185	0.879473	0.954545	0.5		0	0	0	0.0328701	0	0.345435	0.358354	0.311613	0.350697	0.350265	0.28748	0.14374	0.14374	0.34635	0.28748	0	0.334068	0.293311	0.14374	0.316228
10FTHF5GLUtm		1	1	1	0.987656	1	0.764569	0.680027	0.848627	0.598473	0.594647	0.909091	0.954545	0.954545	0.580073	0.909091	1	0.540185	0.879473	0.954545	0.5		0	0	0	0.0328701	0	0.345435	0.358354	0.311613	0.350697	0.350265	0.28748	0.14374	0.14374	0.34635	0.28748	0	0.334068	0.293311	0.14374	0.316228
10FTHF6GLUtl		1	1	1	0.987656	1	0.764569	0.680027	0.848627	0.598473	0.594647	0.909091	0.954545	0.954545	0.580073	0.909091	1	0.540185	0.879473	0.954545	0.5		0	0	0	0.0328701	0	0.345435	0.358354	0.311613	0.350697	0.350265	0.28748	0.14374	0.14374	0.34635	0.28748	0	0.334068	0.293311	0.14374	0.316228
10FTHF6GLUtm		1	1	1	0.987656	1	0.764569	0.680027	0.848627	0.598473	0.594647	0.909091	0.954545	0.954545	0.580073	0.909091	1	0.540185	0.879473	0.954545	0.5		0	0	0	0.0328701	0	0.345435	0.358354	0.311613	0.350697	0.350265	0.28748	0.14374	0.14374	0.34635	0.28748	0	0.334068	0.293311	0.14374	0.316228
10FTHF7GLUtl		1	1	1	0.987656	1	0.764569	0.680027	0.848627	0.598473	0.594647	0.909091	0.954545	0.954545	0.580073	0.909091	1	0.540185	0.879473	0.954545	0.5		0	0	0	0.0328701	0	0.345435	0.358354	0.311613	0.350697	0.350265	0.28748	0.14374	0.14374	0.34635	0.28748	0	0.334068	0.293311	0.14374	0.316228
10FTHF7GLUtm		1	1	1	0.987656	1	0.764569	0.680027	0.848627	0.598473	0.594647	0.909091	0.954545	0.954545	0.580073	0.909091	1	0.540185	0.879473	0.954545	0.5		0	0	0	0.0328701	0	0.345435	0.358354	0.311613	0.350697	0.350265	0.28748	0.14374	0.14374	0.34635	0.28748	0	0.334068	0.293311	0.14374	0.316228
10FTHFtl		1	1	1	0.987656	1	0.764569	0.680027	0.848627	0.598473	0.594647	0.909091	0.954545	0.954545	0.580073	0.909091	1	0.540185	0.879473	0.954545	0.5		0	0	0	0.0328701	0	0.345435	0.358354	0.311613	0.350697	0.350265	0.28748	0.14374	0.14374	0.34635	0.28748	0	0.334068	0.293311	0.14374	0.316228
10FTHFtm		1	1	1	0.987656	1	0.764569	0.680027	0.848627	0.598473	0.594647	0.909091	0.954545	0.954545	0.580073	0.909091	1	0.540185	0.879473	0.954545	0.5		0	0	0	0.0328701	0	0.345435	0.358354	0.311613	0.350697	0.350265	0.28748	0.14374	0.14374	0.34635	0.28748	0	0.334068	0.293311	0.14374	0.316228
13DAMPPOX		1	1	1	0.987656	1	0.764569	0.680027	0.848627	0.598473	0.594647	0.909091	1	1	0.580073	0.909091	1	0.540185	0.879473	1	0.5		0	0	0	0.0328701	0	0.345435	0.358354	0.311613	0.350697	0.350265	0.28748	3.7901e-13	3.7901e-13	0.34635	0.28748	0	0.334068	0.293311	3.7901e-13	0.316228
1MNCAMti		1	1	1	0.987656	1	0.764569	0.680027	0.848627	0.598473	0.594647	0.909091	1	1	0.580073	0.909091	1	0.540185	0.879473	1	0.5		0	0	0	0.0328701	0	0.345435	0.358354	0.311613	0.350697	0.350265	0.28748	3.7901e-13	3.7901e-13	0.34635	0.28748	0	0.334068	0.293311	3.7901e-13	0.316228
1a,24,25VITD2Hm		1	1	1	0.987656	1	0.764569	0.680027	0.848627	0.598473	0.594647	0.909091	1	1	0.580073	0.909091	1	0.540185	0.879473	1	0.5		0	0	0	0.0328701	0	0.345435	0.358354	0.311613	0.350697	0.350265	0.28748	3.7901e-13	3.7901e-13	0.34635	0.28748	0	0.334068	0.293311	3.7901e-13	0.316228
1a,24,25VITD3Hm		1	1	1	0.987656	1	0.764569	0.680027	0.848627	0.598473	0.594647	0.909091	1	1	0.580073	0.909091	1	0.540185	0.879473	1	0.5		0	0	0	0.0328701	0	0.345435	0.358354	0.311613	0.350697	0.350265	0.28748	3.7901e-13	3.7901e-13	0.34635	0.28748	0	0.334068	0.293311	3.7901e-13	0.316228
1a,25VITD2Hm		1	1	1	0.987656	1	0.764569	0.680027	0.848627	0.598473	0.594647	0.909091	1	1	0.580073	0.909091	1	0.540185	0.879473	1	0.5		0	0	0	0.0328701	0	0.345435	0.358354	0.311613	0.350697	0.350265	0.28748	3.7901e-13	3.7901e-13	0.34635	0.28748	0	0.334068	0.293311	3.7901e-13	0.316228
1a,25VITD3Hm		1	1	1	0.987656	1	0.764569	0.680027	0.848627	0.598473	0.594647	0.909091	1	1	0.580073	0.909091	1	0.540185	0.879473	1	0.5		0	0	0	0.0328701	0	0.345435	0.358354	0.311613	0.350697	0.350265	0.28748	3.7901e-13	3.7901e-13	0.34635	0.28748	0	0.334068	0.293311	3.7901e-13	0.316228
24,25DHVITD2t		1	1	1	0.987656	1	0.764569	0.680027	0.848627	0.598473	0.594647	0.909091	1	1	0.580073	0.909091	1	0.540185	0.879473	1	0.5		0	0	0	0.0328701	0	0.345435	0.358354	0.311613	0.350697	0.350265	0.28748	3.7901e-13	3.7901e-13	0.34635	0.28748	0	0.334068	0.293311	3.7901e-13	0.316228
24,25DHVITD2tm		1	1	1	0.987656	1	0.764569	0.680027	0.848627	0.598473	0.594647	0.909091	1	1	0.580073	0.909091	1	0.540185	0.879473	1	0.5		0	0	0	0.0328701	0	0.345435	0.358354	0.311613	0.350697	0.350265	0.28748	3.7901e-13	3.7901e-13	0.34635	0.28748	0	0.334068	0.293311	3.7901e-13	0.316228
24,25DHVITD3t		1	1	1	0.987656	1	0.764569	0.680027	0.848627	0.598473	0.594647	0.909091	0.956761	0.956593	0.580073	0.909091	1	0.540185	0.879473	0.956761	0.5		0	0	0	0.0328701	0	0.345435	0.358354	0.311613	0.350697	0.350265	0.28748	0.136735	0.137266	0.34635	0.28748	0	0.334068	0.293311	0.136735	0.316228
24,25DHVITD3tm		1	1	1	0.987656	1	0.764569	0.680027	0.848627	0.598473	0.594647	0.909091	0.956761	0.956593	0.580073	0.909091	1	0.540185	0.879473	0.956761	0.5		0	0	0	0.0328701	0	0.345435	0.358354	0.311613	0.350697	0.350265	0.28748	0.136735	0.137266	0.34635	0.28748	0	0.334068	0.293311	0.136735	0.316228
24,25VITD2Hm		1	1	1	0.987656	1	0.764569	0.680027	0.848627	0.598473	0.594647	0.909091	1	1	0.580073	0.909091	1	0.540185	0.879473	1	0.5		0	0	0	0.0328701	0	0.345435	0.358354	0.311613	0.350697	0.350265	0.28748	3.7901e-13	3.7901e-13	0.34635	0.28748	0	0.334068	0.293311	3.7901e-13	0.316228
24,25VITD3Hm		1	1	1	0.987656	1	0.764569	0.680027	0.848627	0.598473	0.594647	0.909091	0.956761	0.956593	0.580073	0.909091	1	0.540185	0.879473	0.956761	0.5		0	0	0	0.0328701	0	0.345435	0.358354	0.311613	0.350697	0.350265	0.28748	0.136735	0.137266	0.34635	0.28748	0	0.334068	0.293311	0.136735	0.316228
24NPHte		1	1	1	0.987656	1	0.764569	0.680027	0.848627	0.598473	0.594647	0.909091	1	1	0.580073	0.909091	1	0.540185	0.879473	1	0.5		0	0	0	0.0328701	0	0.345435	0.358354	0.311613	0.350697	0.350265	0.28748	3.7901e-13	3.7901e-13	0.34635	0.28748	0	0.334068	0.293311	3.7901e-13	0.316228
25HVITD2t		1	1	1	0.987656	1	0.764569	0.680027	0.848627	0.598473	0.594647	0.909091	1	1	0.580073	0.909091	1	0.540185	0.879473	1	0.5		0	0	0	0.0328701	0	0.345435	0.358354	0.311613	0.350697	0.350265	0.28748	3.7901e-13	3.7901e-13	0.34635	0.28748	0	0.334068	0.293311	3.7901e-13	0.316228
25HVITD2tin		1	1	1	0.987656	1	0.764569	0.680027	0.848627	0.598473	0.594647	0.909091	1	1	0.580073	0.909091	1	0.540185	0.879473	1	0.5		0	0	0	0.0328701	0	0.345435	0.358354	0.311613	0.350697	0.350265	0.28748	3.7901e-13	3.7901e-13	0.34635	0.28748	0	0.334068	0.293311	3.7901e-13	0.316228
25HVITD2tin-m		1	1	1	0.987656	1	0.764569	0.680027	0.848627	0.598473	0.594647	0.909091	1	1	0.580073	0.909091	1	0.540185	0.879473	1	0.5		0	0	0	0.0328701	0	0.345435	0.358354	0.311613	0.350697	0.350265	0.28748	3.7901e-13	3.7901e-13	0.34635	0.28748	0	0.334068	0.293311	3.7901e-13	0.316228
25HVITD2tm		1	1	1	0.987656	1	0.764569	0.680027	0.848627	0.598473	0.594647	0.909091	1	1	0.580073	0.909091	1	0.540185	0.879473	1	0.5		0	0	0	0.0328701	0	0.345435	0.358354	0.311613	0.350697	0.350265	0.28748	3.7901e-13	3.7901e-13	0.34635	0.28748	0	0.334068	0.293311	3.7901e-13	0.316228
25HVITD3t		1	1	1	0.987656	1	0.764569	0.680027	0.848627	0.598473	0.594647	0.909091	1	1	0.580073	0.909091	1	0.540185	0.879473	1	0.5		0	0	0	0.0328701	0	0.345435	0.358354	0.311613	0.350697	0.350265	0.28748	3.7901e-13	3.7901e-13	0.34635	0.28748	0	0.334068	0.293311	3.7901e-13	0.316228
25HVITD3tin		1	1	1	0.987656	1	0.764569	0.680027	0.848627	0.598473	0.594647	0.909091	1	1	0.580073	0.909091	1	0.540185	0.879473	1	0.5		0	0	0	0.0328701	0	0.345435	0.358354	0.311613	0.350697	0.350265	0.28748	3.7901e-13	3.7901e-13	0.34635	0.28748	0	0.334068	0.293311	3.7901e-13	0.316228
25HVITD3tin-m		1	1	1	0.987656	1	0.764569	0.680027	0.848627	0.598473	0.594647	0.909091	1	1	0.580073	0.909091	1	0.540185	0.879473	1	0.5		0	0	0	0.0328701	0	0.345435	0.358354	0.311613	0.350697	0.350265	0.28748	3.7901e-13	3.7901e-13	0.34635	0.28748	0	0.334068	0.293311	3.7901e-13	0.316228
25HVITD3tm		1	1	1	0.987656	1	0.764569	0.680027	0.848627	0.598473	0.594647	0.909091	1	1	0.580073	0.909091	1	0.540185	0.879473	1	0.5		0	0	0	0.0328701	0	0.345435	0.358354	0.311613	0.350697	0.350265	0.28748	3.7901e-13	3.7901e-13	0.34635	0.28748	0	0.334068	0.293311	3.7901e-13	0.316228
25VITD2Hm		1	1	1	0.987656	1	0.764569	0.680027	0.848627	0.598473	0.594647	0.909091	1	1	0.580073	0.909091	1	0.540185	0.879473	1	0.5		0	0	0	0.0328701	0	0.345435	0.358354	0.311613	0.350697	0.350265	0.28748	3.7901e-13	3.7901e-13	0.34635	0.28748	0	0.334068	0.293311	3.7901e-13	0.316228
25VITD3Hm		1	1	1	0.987656	1	0.764569	0.680027	0.848627	0.598473	0.594647	0.909091	1	1	0.580073	0.909091	1	0.540185	0.879473	1	0.5		0	0	0	0.0328701	0	0.345435	0.358354	0.311613	0.350697	0.350265	0.28748	3.7901e-13	3.7901e-13	0.34635	0.28748	0	0.334068	0.293311	3.7901e-13	0.316228
2DR1PP		1	1	1	0.987656	1	0.764569	0.680027	0.848627	0.598473	0.594647	0.909091	0.955539	0.955724	0.580073	0.909091	1	0.540185	0.879473	0.955539	0.5		0	0	0	0.0328701	0	0.345435	0.358354	0.311613	0.350697	0.350265	0.28748	0.140597	0.140014	0.34635	0.28748	0	0.334068	0.293311	0.140597	0.316228
2HBO		0.976989	0.976989	0.989541	0.950323	0.976989	0.746858	0.643397	0.784698	0.548035	0.588371	0.902815	0.933627	0.933627	0.528531	0.888172	0.976989	0.536528	0.853055	0.933627	0.497908		2.14341e-16	2.22045e-16	0.0114576	0.0522415	2.22045e-16	0.337501	0.348635	0.313723	0.329744	0.343079	0.285672	0.137125	0.137125	0.32316	0.280865	2.22045e-16	0.329145	0.291512	0.137125	0.312973
2HBt2		0.976989	0.976989	0.989541	0.950323	0.976989	0.746858	0.643397	0.784698	0.548035	0.588371	0.902815	0.933627	0.933627	0.528531	0.888172	0.976989	0.536528	0.853055	0.933627	0.497908		2.14341e-16	2.22045e-16	0.0114576	0.0522415	2.22045e-16	0.337501	0.348635	0.313723	0.329744	0.343079	0.285672	0.137125	0.137125	0.32316	0.280865	2.22045e-16	0.329145	0.291512	0.137125	0.312973
2HCO3_NAt		1	1	1	0.987656	1	0.764569	0.680027	0.848627	0.598473	0.594647	0.909091	1	1	0.580073	0.909091	1	0.540185	0.879473	1	0.5		0	0	0	0.0328701	0	0.345435	0.358354	0.311613	0.350697	0.350265	0.28748	3.7901e-13	3.7901e-13	0.34635	0.28748	0	0.334068	0.293311	3.7901e-13	0.316228
2MCITt		0.976989	0.976989	0.989541	0.950323	0.976989	0.746858	0.643397	0.784698	0.548035	0.588371	0.902815	0.933627	0.933627	0.528531	0.888172	0.976989	0.536528	0.853055	0.933627	0.497908		2.14341e-16	2.22045e-16	0.0114576	0.0522415	1.00423e-16	0.337501	0.348635	0.313723	0.329744	0.343079	0.285672	0.137125	0.137125	0.32316	0.280865	1.4202e-16	0.329145	0.291512	0.137125	0.312973
2OXOADOXm		1	1	1	0.987656	1	0.764569	0.680027	0.848627	0.598473	0.594647	0.909091	1	1	0.580073	0.909091	1	0.540185	0.879473	1	0.5		0	0	0	0.0328701	0	0.345435	0.358354	0.311613	0.350697	0.350265	0.28748	3.7901e-13	3.7901e-13	0.34635	0.28748	0	0.334068	0.293311	3.7901e-13	0.316228
2OXOADPTm		1	1	1	0.987656	1	0.764569	0.680027	0.848627	0.598473	0.594647	0.909091	1	1	0.580073	0.909091	1	0.540185	0.879473	1	0.5		0	0	0	0.0328701	0	0.345435	0.358354	0.311613	0.350697	0.350265	0.28748	3.7901e-13	3.7901e-13	0.34635	0.28748	0	0.334068	0.293311	3.7901e-13	0.316228
34DHPHAMT		1	1	1	0.987656	1	0.764569	0.680027	0.848627	0.598473	0.594647	0.909091	1	1	0.580073	0.909091	1	0.540185	0.879473	1	0.5		0	0	0	0.0328701	0	0.345435	0.358354	0.311613	0.350697	0.350265	0.28748	3.7901e-13	3.7901e-13	0.34635	0.28748	0	0.334068	0.293311	3.7901e-13	0.316228
34DHPLACOX		1	1	1	0.987656	1	0.764569	0.680027	0.848627	0.598473	0.594647	0.909091	1	1	0.580073	0.909091	1	0.540185	0.879473	1	0.5		0	0	0	0.0328701	0	0.345435	0.358354	0.311613	0.350697	0.350265	0.28748	3.7901e-13	3.7901e-13	0.34635	0.28748	0	0.334068	0.293311	3.7901e-13	0.316228
34DHPLACOX(NADP)		1	1	1	0.987656	1	0.764569	0.680027	0.848627	0.598473	0.594647	0.909091	1	1	0.580073	0.909091	1	0.540185	0.879473	1	0.5		0	0	0	0.0328701	0	0.345435	0.358354	0.311613	0.350697	0.350265	0.28748	3.7901e-13	3.7901e-13	0.34635	0.28748	0	0.334068	0.293311	3.7901e-13	0.316228
34HPLFM		1	1	1	0.987656	1	0.764569	0.680027	0.848627	0.598473	0.594647	0.909091	1	1	0.580073	0.909091	1	0.540185	0.879473	1	0.5		0	0	0	0.0328701	0	0.345435	0.358354	0.311613	0.350697	0.350265	0.28748	3.7901e-13	3.7901e-13	0.34635	0.28748	0	0.334068	0.293311	3.7901e-13	0.316228
35CGMPtn		1	1	1	0.987656	1	0.764569	0.680027	0.848627	0.598473	0.594647	0.909091	0.954545	0.954545	0.580073	0.909091	1	0.540185	0.879473	0.954545	0.5		0	0	0	0.0328701	0	0.345435	0.358354	0.311613	0.350697	0.350265	0.28748	0.14374	0.14374	0.34635	0.28748	0	0.334068	0.293311	0.14374	0.316228
3AIBTm		0.968652	0.968652	0.985751	0.965202	0.968652	0.740486	0.638094	0.778399	0.543686	0.586097	0.900541	0.926047	0.926047	0.524362	0.880593	0.968652	0.535012	0.845831	0.926047	0.49715		1.11022e-16	1.11022e-16	0.0156091	0.0267638	1.11022e-16	0.334621	0.345666	0.310896	0.327038	0.340514	0.285105	0.134728	0.134728	0.320531	0.278468	1.11022e-16	0.327139	0.288974	0.134728	0.311819
3AIBt		0.968652	0.968652	0.985751	0.965202	0.968652	0.740486	0.638094	0.778399	0.543686	0.586097	0.900541	0.926047	0.926047	0.524362	0.880593	0.968652	0.535012	0.845831	0.926047	0.49715		1.11022e-16	1.11022e-16	0.0156091	0.0267638	1.11022e-16	0.334621	0.345666	0.310896	0.327038	0.340514	0.285105	0.134728	0.134728	0.320531	0.278468	1.11022e-16	0.327139	0.288974	0.134728	0.311819
3AIBtm		0.968652	0.968652	0.985751	0.965202	0.968652	0.740486	0.638094	0.778399	0.543686	0.586097	0.900541	0.926047	0.926047	0.524362	0.880593	0.968652	0.535012	0.845831	0.926047	0.49715		1.11022e-16	1.11022e-16	0.0156091	0.0267638	1.11022e-16	0.334621	0.345666	0.310896	0.327038	0.340514	0.285105	0.134728	0.134728	0.320531	0.278468	1.11022e-16	0.327139	0.288974	0.134728	0.311819
3DPHBH1		1	1	1	0.987656	1	0.764569	0.680027	0.848627	0.598473	0.594647	0.909091	1	1	0.580073	0.909091	1	0.540185	0.879473	1	0.5		0	0	0	0.0328701	0	0.345435	0.358354	0.311613	0.350697	0.350265	0.28748	3.7901e-13	3.7901e-13	0.34635	0.28748	0	0.334068	0.293311	3.7901e-13	0.316228
3DPHBH2		1	1	1	0.987656	1	0.764569	0.680027	0.848627	0.598473	0.594647	0.909091	1	1	0.580073	0.909091	1	0.540185	0.879473	1	0.5		0	0	0	0.0328701	0	0.345435	0.358354	0.311613	0.350697	0.350265	0.28748	3.7901e-13	3.7901e-13	0.34635	0.28748	0	0.334068	0.293311	3.7901e-13	0.316228
3DSPHR		1	1	1	0.987571	1	0.764569	0.679971	0.81564	0.590602	0.594647	0.909091	0.954751	0.954545	0.570855	0.909091	1	0.540185	0.876874	0.957455	0.5		0	0	0	0.0330071	0	0.345435	0.358366	0.320785	0.349314	0.350265	0.28748	0.143091	0.14374	0.343514	0.28748	0	0.334068	0.295239	0.13454	0.316228
3HAO		1	1	1	0.987656	1	0.764569	0.680027	0.848627	0.598473	0.594647	0.909091	1	1	0.580073	0.909091	1	0.540185	0.879473	1	0.5		0	0	0	0.0328701	0	0.345435	0.358354	0.311613	0.350697	0.350265	0.28748	3.7901e-13	3.7901e-13	0.34635	0.28748	0	0.334068	0.293311	3.7901e-13	0.316228
3HBCDm		1	1	1	0.987656	1	0.764569	0.680027	0.848627	0.598473	0.594647	0.909091	1	1	0.580073	0.909091	1	0.540185	0.879473	1	0.5		0	0	0	0.0328701	0	0.345435	0.358354	0.311613	0.350697	0.350265	0.28748	3.7901e-13	3.7901e-13	0.34635	0.28748	0	0.334068	0.293311	3.7901e-13	0.316228
3HBCOAHLm		0.968652	0.968652	0.900948	0.942344	0.968652	0.740486	0.638094	0.778399	0.543686	0.586097	0.897168	0.926047	0.926047	0.524362	0.880593	0.968652	0.535012	0.845831	0.926047	0.49715		1.11022e-16	1.11022e-16	0.080977	0.0515983	1.11022e-16	0.334621	0.345666	0.310896	0.327038	0.340514	0.284126	0.134728	0.134728	0.320531	0.278468	1.11022e-16	0.327139	0.288974	0.134728	0.311819
3HCO3_NAt		1	1	1	0.987656	1	0.764569	0.680027	0.848627	0.598473	0.594647	0.909091	1	1	0.580073	0.909091	1	0.540185	0.879473	1	0.5		0	0	0	0.0328701	0	0.345435	0.358354	0.311613	0.350697	0.350265	0.28748	3.7901e-13	3.7901e-13	0.34635	0.28748	0	0.334068	0.293311	3.7901e-13	0.316228
3HLYTCL		1	1	1	0.987656	1	0.764569	0.680027	0.848627	0.598473	0.594647	0.909091	1	1	0.580073	0.909091	1	0.540185	0.879473	1	0.5		0	0	0	0.0328701	0	0.345435	0.358354	0.311613	0.350697	0.350265	0.28748	3.7901e-13	3.7901e-13	0.34635	0.28748	0	0.334068	0.293311	3.7901e-13	0.316228
3HPCOAHYD		1	1	1	0.987656	1	0.764569	0.680027	0.848627	0.598473	0.594647	0.909091	1	1	0.580073	0.909091	1	0.540185	0.879473	1	0.5		0	0	0	0.0328701	0	0.345435	0.358354	0.311613	0.350697	0.350265	0.28748	3.7901e-13	3.7901e-13	0.34635	0.28748	0	0.334068	0.293311	3.7901e-13	0.316228
3HXKYNDCL		1	1	1	0.987656	1	0.764569	0.680027	0.848627	0.598473	0.594647	0.909091	1	1	0.580073	0.909091	1	0.540185	0.879473	1	0.5		0	0	0	0.0328701	0	0.345435	0.358354	0.311613	0.350697	0.350265	0.28748	3.7901e-13	3.7901e-13	0.34635	0.28748	0	0.334068	0.293311	3.7901e-13	0.316228
3HXKYNOXDA		1	1	1	0.987656	1	0.764569	0.680027	0.848627	0.598473	0.594647	0.909091	1	1	0.580073	0.909091	1	0.540185	0.879473	1	0.5		0	0	0	0.0328701	0	0.345435	0.358354	0.311613	0.350697	0.350265	0.28748	3.7901e-13	3.7901e-13	0.34635	0.28748	0	0.334068	0.293311	3.7901e-13	0.316228
3M4HDXPAC		1	1	1	0.987656	1	0.764569	0.680027	0.848627	0.598473	0.594647	0.909091	1	1	0.580073	0.909091	1	0.540185	0.879473	1	0.5		0	0	0	0.0328701	0	0.345435	0.358354	0.311613	0.350697	0.350265	0.28748	3.7901e-13	3.7901e-13	0.34635	0.28748	0	0.334068	0.293311	3.7901e-13	0.316228
3MLDAt		1	1	1	0.987656	1	0.764569	0.658227	0.802201	0.56028	0.594647	0.909091	0.954545	0.954545	0.540267	0.909091	1	0.540185	0.873021	0.954545	0.5		0	0	0	0.0328701	0	0.345435	0.356873	0.321534	0.33733	0.350265	0.28748	0.14374	0.14374	0.330521	0.28748	0	0.334068	0.298491	0.14374	0.316228
3MOBt2im		1	1	1	0.987656	1	0.764569	0.680027	0.848627	0.598473	0.594647	0.909091	1	1	0.580073	0.909091	1	0.540185	0.879473	1	0.5		0	0	0	0.0328701	0	0.345435	0.358354	0.311613	0.350697	0.350265	0.28748	3.7901e-13	3.7901e-13	0.34635	0.28748	0	0.334068	0.293311	3.7901e-13	0.316228
3MOPt2im		1	1	1	0.987656	1	0.764569	0.680027	0.848627	0.598473	0.594647	0.909091	1	1	0.580073	0.909091	1	0.540185	0.879473	1	0.5		0	0	0	0.0328701	0	0.345435	0.358354	0.311613	0.350697	0.350265	0.28748	3.7901e-13	3.7901e-13	0.34635	0.28748	0	0.334068	0.293311	3.7901e-13	0.316228
3MOX4HOXPGALDOX		1	1	1	0.987656	1	0.764569	0.680027	0.848627	0.598473	0.594647	0.909091	1	1	0.580073	0.909091	1	0.540185	0.879473	1	0.5		0	0	0	0.0328701	0	0.345435	0.358354	0.311613	0.350697	0.350265	0.28748	3.7901e-13	3.7901e-13	0.34635	0.28748	0	0.334068	0.293311	3.7901e-13	0.316228
3MOX4HOXPGALDOX(NADP)		1	1	1	0.987656	1	0.764569	0.680027	0.848627	0.598473	0.594647	0.909091	1	1	0.580073	0.909091	1	0.540185	0.879473	1	0.5		0	0	0	0.0328701	0	0.345435	0.358354	0.311613	0.350697	0.350265	0.28748	3.7901e-13	3.7901e-13	0.34635	0.28748	0	0.334068	0.293311	3.7901e-13	0.316228
3MOXTYROX		1	1	1	0.987656	1	0.764569	0.680027	0.848627	0.598473	0.594647	0.909091	1	1	0.580073	0.909091	1	0.540185	0.879473	1	0.5		0	0	0	0.0328701	0	0.345435	0.358354	0.311613	0.350697	0.350265	0.28748	3.7901e-13	3.7901e-13	0.34635	0.28748	0	0.334068	0.293311	3.7901e-13	0.316228
3NTD7l		1	1	1	0.987656	1	0.764569	0.680027	0.848627	0.598473	0.594647	0.909091	1	1	0.580073	0.909091	1	0.540185	0.879473	1	0.5		0	0	0	0.0328701	0	0.345435	0.358354	0.311613	0.350697	0.350265	0.28748	3.7901e-13	3.7901e-13	0.34635	0.28748	0	0.334068	0.293311	3.7901e-13	0.316228
3SALAASPm		1	1	1	0.987656	1	0.764569	0.680027	0.848627	0.598473	0.594647	0.909091	1	1	0.580073	0.909091	1	0.540185	0.879473	1	0.5		0	0	0	0.0328701	0	0.345435	0.358354	0.311613	0.350697	0.350265	0.28748	3.7901e-13	3.7901e-13	0.34635	0.28748	0	0.334068	0.293311	3.7901e-13	0.316228
3SALATAi		1	1	1	0.987656	1	0.764569	0.680027	0.848627	0.598473	0.594647	0.909091	1	1	0.580073	0.909091	1	0.540185	0.879473	1	0.5		0	0	0	0.0328701	0	0.345435	0.358354	0.311613	0.350697	0.350265	0.28748	3.7901e-13	3.7901e-13	0.34635	0.28748	0	0.334068	0.293311	3.7901e-13	0.316228
3SALATAim		1	1	1	0.987656	1	0.764569	0.680027	0.848627	0.598473	0.594647	0.909091	1	1	0.580073	0.909091	1	0.540185	0.879473	1	0.5		0	0	0	0.0328701	0	0.345435	0.358354	0.311613	0.350697	0.350265	0.28748	3.7901e-13	3.7901e-13	0.34635	0.28748	0	0.334068	0.293311	3.7901e-13	0.316228
41R1H2MAE12BOOX		1	1	1	0.987656	1	0.764569	0.680027	0.848627	0.598473	0.594647	0.909091	1	1	0.580073	0.909091	1	0.540185	0.879473	1	0.5		0	0	0	0.0328701	0	0.345435	0.358354	0.311613	0.350697	0.350265	0.28748	3.7901e-13	3.7901e-13	0.34635	0.28748	0	0.334068	0.293311	3.7901e-13	0.316228
41R2A1H12BOOX		1	1	1	0.987656	1	0.764569	0.680027	0.848627	0.598473	0.594647	0.909091	1	1	0.580073	0.909091	1	0.540185	0.879473	1	0.5		0	0	0	0.0328701	0	0.345435	0.358354	0.311613	0.350697	0.350265	0.28748	3.7901e-13	3.7901e-13	0.34635	0.28748	0	0.334068	0.293311	3.7901e-13	0.316228
42A12BOOX		1	1	1	0.987656	1	0.764569	0.680027	0.848627	0.598473	0.594647	0.909091	1	1	0.580073	0.909091	1	0.540185	0.879473	1	0.5		0	0	0	0.0328701	0	0.345435	0.358354	0.311613	0.350697	0.350265	0.28748	3.7901e-13	3.7901e-13	0.34635	0.28748	0	0.334068	0.293311	3.7901e-13	0.316228
4ABUTtm		1	1	1	0.987656	1	0.764569	0.680027	0.848468	0.598473	0.594647	0.909091	0.962402	0.963418	0.580073	0.909091	1	0.540185	0.879473	0.963327	0.5		0	0	0	0.0328701	0	0.345435	0.358354	0.311592	0.350697	0.350265	0.28748	0.118896	0.115682	0.34635	0.28748	0	0.334068	0.293311	0.115969	0.316228
4HBZCOAFm		1	1	1	0.987656	1	0.764569	0.680027	0.848627	0.598473	0.594647	0.909091	1	1	0.580073	0.909091	1	0.540185	0.879473	1	0.5		0	0	0	0.0328701	0	0.345435	0.358354	0.311613	0.350697	0.350265	0.28748	3.7901e-13	3.7901e-13	0.34635	0.28748	0	0.334068	0.293311	3.7901e-13	0.316228
4HBZFm		1	1	1	0.987656	1	0.764569	0.680027	0.848627	0.598473	0.594647	0.909091	1	1	0.580073	0.909091	1	0.540185	0.879473	1	0.5		0	0	0	0.0328701	0	0.345435	0.358354	0.311613	0.350697	0.350265	0.28748	3.7901e-13	3.7901e-13	0.34635	0.28748	0	0.334068	0.293311	3.7901e-13	0.316228
4HDEBRISOQUINEte		1	1	1	0.987656	1	0.764569	0.680027	0.848627	0.598473	0.594647	0.909091	1	1	0.580073	0.909091	1	0.540185	0.879473	1	0.5		0	0	0	0.0328701	0	0.345435	0.358354	0.311613	0.350697	0.350265	0.28748	3.7901e-13	3.7901e-13	0.34635	0.28748	0	0.334068	0.293311	3.7901e-13	0.316228
4HGLSDm		1	1	1	0.987656	1	0.764569	0.680027	0.848627	0.598473	0.594647	0.909091	1	1	0.580073	0.909091	1	0.540185	0.879473	1	0.5		0	0	0	0.0328701	0	0.345435	0.358354	0.311613	0.350697	0.350265	0.28748	3.7901e-13	3.7901e-13	0.34635	0.28748	0	0.334068	0.293311	3.7901e-13	0.316228
4HOXPACDOX(NADP)		1	1	1	0.987444	1	0.764569	0.680027	0.81919	0.598473	0.594647	0.909091	0.954545	0.954545	0.580073	0.909091	1	0.540185	0.878236	0.954545	0.5		0	0	0	0.0332146	0	0.345435	0.358354	0.320104	0.350697	0.350265	0.28748	0.14374	0.14374	0.34635	0.28748	0	0.334068	0.294202	0.14374	0.316228
4MOPt2im		1	1	1	0.987656	1	0.764569	0.680027	0.848627	0.598473	0.594647	0.909091	1	1	0.580073	0.909091	1	0.540185	0.879473	1	0.5		0	0	0	0.0328701	0	0.345435	0.358354	0.311613	0.350697	0.350265	0.28748	3.7901e-13	3.7901e-13	0.34635	0.28748	0	0.334068	0.293311	3.7901e-13	0.316228
4MPTNLte		1	1	1	0.987656	1	0.764569	0.680027	0.848627	0.598473	0.594647	0.909091	1	1	0.580073	0.909091	1	0.540185	0.879473	1	0.5		0	0	0	0.0328701	0	0.345435	0.358354	0.311613	0.350697	0.350265	0.28748	3.7901e-13	3.7901e-13	0.34635	0.28748	0	0.334068	0.293311	3.7901e-13	0.316228
4MPTNLtm		1	1	1	0.987656	1	0.764569	0.680027	0.848627	0.598473	0.594647	0.909091	1	1	0.580073	0.909091	1	0.540185	0.879473	1	0.5		0	0	0	0.0328701	0	0.345435	0.358354	0.311613	0.350697	0.350265	0.28748	3.7901e-13	3.7901e-13	0.34635	0.28748	0	0.334068	0.293311	3.7901e-13	0.316228
4MPTNLtr		1	1	1	0.987656	1	0.764569	0.680027	0.848627	0.598473	0.594647	0.909091	1	1	0.580073	0.909091	1	0.540185	0.879473	1	0.5		0	0	0	0.0328701	0	0.345435	0.358354	0.311613	0.350697	0.350265	0.28748	3.7901e-13	3.7901e-13	0.34635	0.28748	0	0.334068	0.293311	3.7901e-13	0.316228
4NPHSFte		1	1	1	0.987656	1	0.764569	0.680027	0.848627	0.598473	0.594647	0.909091	1	1	0.580073	0.909091	1	0.540185	0.879473	1	0.5		0	0	0	0.0328701	0	0.345435	0.358354	0.311613	0.350697	0.350265	0.28748	3.7901e-13	3.7901e-13	0.34635	0.28748	0	0.334068	0.293311	3.7901e-13	0.316228
4NPHSULT		1	1	1	0.987656	1	0.764569	0.680027	0.848627	0.598473	0.594647	0.909091	1	1	0.580073	0.909091	1	0.540185	0.879473	1	0.5		0	0	0	0.0328701	0	0.345435	0.358354	0.311613	0.350697	0.350265	0.28748	3.7901e-13	3.7901e-13	0.34635	0.28748	0	0.334068	0.293311	3.7901e-13	0.316228
4NPHte		1	1	1	0.987656	1	0.764569	0.680027	0.848627	0.598473	0.594647	0.909091	1	1	0.580073	0.909091	1	0.540185	0.879473	1	0.5		0	0	0	0.0328701	0	0.345435	0.358354	0.311613	0.350697	0.350265	0.28748	3.7901e-13	3.7901e-13	0.34635	0.28748	0	0.334068	0.293311	3.7901e-13	0.316228
4PYRDX		1	1	1	0.987656	1	0.764569	0.680027	0.848627	0.598473	0.594647	0.909091	1	1	0.580073	0.909091	1	0.540185	0.879473	1	0.5		0	0	0	0.0328701	0	0.345435	0.358354	0.311613	0.350697	0.350265	0.28748	3.7901e-13	3.7901e-13	0.34635	0.28748	0	0.334068	0.293311	3.7901e-13	0.316228
5ADTSTSTERONEGLCte		1	1	1	0.987656	1	0.764569	0.680027	0.848627	0.598473	0.594647	0.909091	1	1	0.580073	0.909091	1	0.540185	0.879473	1	0.5		0	0	0	0.0328701	0	0.345435	0.358354	0.311613	0.350697	0.350265	0.28748	3.7901e-13	3.7901e-13	0.34635	0.28748	0	0.334068	0.293311	3.7901e-13	0.316228
5ADTSTSTERONEGLCtr		1	1	1	0.987656	1	0.764569	0.680027	0.848627	0.598473	0.594647	0.909091	1	1	0.580073	0.909091	1	0.540185	0.879473	1	0.5		0	0	0	0.0328701	0	0.345435	0.358354	0.311613	0.350697	0.350265	0.28748	3.7901e-13	3.7901e-13	0.34635	0.28748	0	0.334068	0.293311	3.7901e-13	0.316228
5ADTSTSTERONEte		1	1	1	0.987656	1	0.764569	0.680027	0.848627	0.598473	0.594647	0.909091	1	1	0.580073	0.909091	1	0.540185	0.879473	1	0.5		0	0	0	0.0328701	0	0.345435	0.358354	0.311613	0.350697	0.350265	0.28748	3.7901e-13	3.7901e-13	0.34635	0.28748	0	0.334068	0.293311	3.7901e-13	0.316228
5ADTSTSTERONEtr		1	1	1	0.987656	1	0.764569	0.680027	0.848627	0.598473	0.594647	0.909091	1	1	0.580073	0.909091	1	0.540185	0.879473	1	0.5		0	0	0	0.0328701	0	0.345435	0.358354	0.311613	0.350697	0.350265	0.28748	3.7901e-13	3.7901e-13	0.34635	0.28748	0	0.334068	0.293311	3.7901e-13	0.316228
5DHFtl		1	1	1	0.987656	1	0.764569	0.680027	0.848627	0.598473	0.594647	0.909091	0.954545	0.954545	0.580073	0.909091	1	0.540185	0.879473	0.954545	0.5		0	0	0	0.0328701	0	0.345435	0.358354	0.311613	0.350697	0.350265	0.28748	0.14374	0.14374	0.34635	0.28748	0	0.334068	0.293311	0.14374	0.316228
5FTHFt2		1	1	1	0.987656	1	0.764569	0.680027	0.848627	0.598473	0.594647	0.909091	1	1	0.580073	0.909091	1	0.540185	0.879473	1	0.5		0	0	0	0.0328701	0	0.345435	0.358354	0.311613	0.350697	0.350265	0.28748	3.7901e-13	3.7901e-13	0.34635	0.28748	0	0.334068	0.293311	3.7901e-13	0.316228
5HLTDL		1	1	1	0.987656	1	0.764569	0.680027	0.822418	0.598473	0.594647	0.909091	0.954545	0.954545	0.580073	0.909091	1	0.540185	0.879473	0.954545	0.5		0	0	0	0.0328701	0	0.345435	0.358354	0.319595	0.350697	0.350265	0.28748	0.14374	0.14374	0.34635	0.28748	0	0.334068	0.293311	0.14374	0.316228
5HOXINDACTO2OX		1	1	1	0.987656	1	0.764569	0.680027	0.848627	0.598473	0.594647	0.909091	1	1	0.580073	0.909091	1	0.540185	0.879473	1	0.5		0	0	0	0.0328701	0	0.345435	0.358354	0.311613	0.350697	0.350265	0.28748	3.7901e-13	3.7901e-13	0.34635	0.28748	0	0.334068	0.293311	3.7901e-13	0.316228
5HOXINDACTOX		1	1	1	0.987656	1	0.764569	0.680027	0.848627	0.598473	0.594647	0.909091	1	1	0.580073	0.909091	1	0.540185	0.879473	1	0.5		0	0	0	0.0328701	0	0.345435	0.358354	0.311613	0.350697	0.350265	0.28748	3.7901e-13	3.7901e-13	0.34635	0.28748	0	0.334068	0.293311	3.7901e-13	0.316228
5HOXINDACTOXm		1	1	1	0.987656	1	0.764569	0.680027	0.848627	0.598473	0.594647	0.909091	1	1	0.580073	0.909091	1	0.540185	0.879473	1	0.5		0	0	0	0.0328701	0	0.345435	0.358354	0.311613	0.350697	0.350265	0.28748	3.7901e-13	3.7901e-13	0.34635	0.28748	0	0.334068	0.293311	3.7901e-13	0.316228
5HOXINOXDA		1	1	1	0.987656	1	0.764569	0.680027	0.848627	0.598473	0.594647	0.909091	1	1	0.580073	0.909091	1	0.540185	0.879473	1	0.5		0	0	0	0.0328701	0	0.345435	0.358354	0.311613	0.350697	0.350265	0.28748	3.7901e-13	3.7901e-13	0.34635	0.28748	0	0.334068	0.293311	3.7901e-13	0.316228
5HTRPDOX		1	1	1	0.987656	1	0.764569	0.680027	0.848627	0.598473	0.594647	0.909091	1	1	0.580073	0.909091	1	0.540185	0.879473	1	0.5		0	0	0	0.0328701	0	0.345435	0.358354	0.311613	0.350697	0.350265	0.28748	3.7901e-13	3.7901e-13	0.34635	0.28748	0	0.334068	0.293311	3.7901e-13	0.316228
5HTRPVESSEC		1	1	1	0.987656	1	0.764569	0.680027	0.822418	0.598473	0.594647	0.909091	0.954545	0.954545	0.580073	0.909091	1	0.540185	0.879473	0.954545	0.5		0	0	0	0.0328701	0	0.345435	0.358354	0.319595	0.350697	0.350265	0.28748	0.14374	0.14374	0.34635	0.28748	0	0.334068	0.293311	0.14374	0.316228
5HXKYNDCL		1	1	1	0.987656	1	0.764569	0.680027	0.848627	0.598473	0.594647	0.909091	1	1	0.580073	0.909091	1	0.540185	0.879473	1	0.5		0	0	0	0.0328701	0	0.345435	0.358354	0.311613	0.350697	0.350265	0.28748	3.7901e-13	3.7901e-13	0.34635	0.28748	0	0.334068	0.293311	3.7901e-13	0.316228
5HXKYNOXDA		1	1	1	0.987656	1	0.764569	0.680027	0.848627	0.598473	0.594647	0.909091	1	1	0.580073	0.909091	1	0.540185	0.879473	1	0.5		0	0	0	0.0328701	0	0.345435	0.358354	0.311613	0.350697	0.350265	0.28748	3.7901e-13	3.7901e-13	0.34635	0.28748	0	0.334068	0.293311	3.7901e-13	0.316228
5MTHFt		1	1	1	0.987656	1	0.764569	0.680027	0.848627	0.598473	0.594647	0.909091	1	1	0.580073	0.909091	1	0.540185	0.879473	1	0.5		0	0	0	0.0328701	0	0.345435	0.358354	0.311613	0.350697	0.350265	0.28748	3.7901e-13	3.7901e-13	0.34635	0.28748	0	0.334068	0.293311	3.7901e-13	0.316228
5MTHFt2		1	1	1	0.987656	1	0.764569	0.680027	0.848627	0.598473	0.594647	0.909091	1	1	0.580073	0.909091	1	0.540185	0.879473	1	0.5		0	0	0	0.0328701	0	0.345435	0.358354	0.311613	0.350697	0.350265	0.28748	3.7901e-13	3.7901e-13	0.34635	0.28748	0	0.334068	0.293311	3.7901e-13	0.316228
5THFtl		1	1	1	0.987656	1	0.764569	0.680027	0.848627	0.598473	0.594647	0.909091	0.954545	0.954545	0.580073	0.909091	1	0.540185	0.879473	0.954545	0.5		0	0	0	0.0328701	0	0.345435	0.358354	0.311613	0.350697	0.350265	0.28748	0.14374	0.14374	0.34635	0.28748	0	0.334068	0.293311	0.14374	0.316228
5THFtm		1	1	1	0.987656	1	0.764569	0.680027	0.848627	0.598473	0.594647	0.909091	0.954545	0.954545	0.580073	0.909091	1	0.540185	0.879473	0.954545	0.5		0	0	0	0.0328701	0	0.345435	0.358354	0.311613	0.350697	0.350265	0.28748	0.14374	0.14374	0.34635	0.28748	0	0.334068	0.293311	0.14374	0.316228
6DHFtl		1	1	1	0.987656	1	0.764569	0.680027	0.848627	0.598473	0.594647	0.909091	0.954545	0.954545	0.580073	0.909091	1	0.540185	0.879473	0.954545	0.5		0	0	0	0.0328701	0	0.345435	0.358354	0.311613	0.350697	0.350265	0.28748	0.14374	0.14374	0.34635	0.28748	0	0.334068	0.293311	0.14374	0.316228
6DHFtm		1	1	1	0.987656	1	0.764569	0.680027	0.848627	0.598473	0.594647	0.909091	0.954545	0.954545	0.580073	0.909091	1	0.540185	0.879473	0.954545	0.5		0	0	0	0.0328701	0	0.345435	0.358354	0.311613	0.350697	0.350265	0.28748	0.14374	0.14374	0.34635	0.28748	0	0.334068	0.293311	0.14374	0.316228
6HTSTSTERONEte		1	1	1	0.987656	1	0.764569	0.680027	0.848627	0.598473	0.594647	0.909091	1	1	0.580073	0.909091	1	0.540185	0.879473	1	0.5		0	0	0	0.0328701	0	0.345435	0.358354	0.311613	0.350697	0.350265	0.28748	3.7901e-13	3.7901e-13	0.34635	0.28748	0	0.334068	0.293311	3.7901e-13	0.316228
6THFtl		1	1	1	0.987656	1	0.764569	0.680027	0.848627	0.598473	0.594647	0.909091	0.954545	0.954545	0.580073	0.909091	1	0.540185	0.879473	0.954545	0.5		0	0	0	0.0328701	0	0.345435	0.358354	0.311613	0.350697	0.350265	0.28748	0.14374	0.14374	0.34635	0.28748	0	0.334068	0.293311	0.14374	0.316228
6THFtm		1	1	1	0.987656	1	0.764569	0.680027	0.848627	0.598473	0.594647	0.909091	0.954545	0.954545	0.580073	0.909091	1	0.540185	0.879473	0.954545	0.5		0	0	0	0.0328701	0	0.345435	0.358354	0.311613	0.350697	0.350265	0.28748	0.14374	0.14374	0.34635	0.28748	0	0.334068	0.293311	0.14374	0.316228
7DHCHSTEROLtr		1	1	1	0.987656	1	0.764569	0.680027	0.848627	0.598473	0.594647	0.909091	0.956574	0.956474	0.580073	0.909091	1	0.540185	0.879473	0.956569	0.5		0	0	0	0.0328701	0	0.345435	0.358354	0.311613	0.350697	0.350265	0.28748	0.137325	0.13764	0.34635	0.28748	0	0.334068	0.293311	0.13734	0.316228
7DHFtl		1	1	1	0.987656	1	0.764569	0.680027	0.848627	0.598473	0.594647	0.909091	0.954545	0.954545	0.580073	0.909091	1	0.540185	0.879473	0.954545	0.5		0	0	0	0.0328701	0	0.345435	0.358354	0.311613	0.350697	0.350265	0.28748	0.14374	0.14374	0.34635	0.28748	0	0.334068	0.293311	0.14374	0.316228
7DHFtm		1	1	1	0.987656	1	0.764569	0.680027	0.848627	0.598473	0.594647	0.909091	0.954545	0.954545	0.580073	0.909091	1	0.540185	0.879473	0.954545	0.5		0	0	0	0.0328701	0	0.345435	0.358354	0.311613	0.350697	0.350265	0.28748	0.14374	0.14374	0.34635	0.28748	0	0.334068	0.293311	0.14374	0.316228
7THFtl		1	1	1	0.987656	1	0.764569	0.680027	0.848627	0.598473	0.594647	0.909091	0.954545	0.954545	0.580073	0.909091	1	0.540185	0.879473	0.954545	0.5		0	0	0	0.0328701	0	0.345435	0.358354	0.311613	0.350697	0.350265	0.28748	0.14374	0.14374	0.34635	0.28748	0	0.334068	0.293311	0.14374	0.316228
7THFtm		1	1	1	0.987656	1	0.764569	0.680027	0.848627	0.598473	0.594647	0.909091	0.954545	0.954545	0.580073	0.909091	1	0.540185	0.879473	0.954545	0.5		0	0	0	0.0328701	0	0.345435	0.358354	0.311613	0.350697	0.350265	0.28748	0.14374	0.14374	0.34635	0.28748	0	0.334068	0.293311	0.14374	0.316228
A4GALTc		1	1	1	0.987656	1	0.764569	0.680027	0.848627	0.598473	0.594647	0.909091	1	1	0.580073	0.909091	1	0.540185	0.879473	1	0.5		0	0	0	0.0328701	0	0.345435	0.358354	0.311613	0.350697	0.350265	0.28748	3.7901e-13	3.7901e-13	0.34635	0.28748	0	0.334068	0.293311	3.7901e-13	0.316228
A4GALTg		1	1	1	0.987656	1	0.764569	0.680027	0.848627	0.598473	0.594647	0.909091	1	1	0.580073	0.909091	1	0.540185	0.879473	1	0.5		0	0	0	0.0328701	0	0.345435	0.358354	0.311613	0.350697	0.350265	0.28748	3.7901e-13	3.7901e-13	0.34635	0.28748	0	0.334068	0.293311	3.7901e-13	0.316228
AACOAT		1	1	1	0.987656	1	0.764569	0.680027	0.848627	0.598473	0.594647	0.909091	0.954545	0.954545	0.580073	0.909091	1	0.540185	0.879473	0.954545	0.5		0	0	0	0.0328701	0	0.345435	0.358354	0.311613	0.350697	0.350265	0.28748	0.14374	0.14374	0.34635	0.28748	0	0.334068	0.293311	0.14374	0.316228
ABO1g		1	1	1	0.987656	1	0.764569	0.680027	0.848627	0.598473	0.594647	0.909091	1	1	0.580073	0.909091	1	0.540185	0.879473	1	0.5		0	0	0	0.0328701	0	0.345435	0.358354	0.311613	0.350697	0.350265	0.28748	3.7901e-13	3.7901e-13	0.34635	0.28748	0	0.334068	0.293311	3.7901e-13	0.316228
ABO2g		1	1	1	0.987656	1	0.764569	0.680027	0.848627	0.598473	0.594647	0.909091	1	1	0.580073	0.909091	1	0.540185	0.879473	1	0.5		0	0	0	0.0328701	0	0.345435	0.358354	0.311613	0.350697	0.350265	0.28748	3.7901e-13	3.7901e-13	0.34635	0.28748	0	0.334068	0.293311	3.7901e-13	0.316228
ABO3g		1	1	1	0.987656	1	0.764569	0.680027	0.848627	0.598473	0.594647	0.909091	1	1	0.580073	0.909091	1	0.540185	0.879473	1	0.5		0	0	0	0.0328701	0	0.345435	0.358354	0.311613	0.350697	0.350265	0.28748	3.7901e-13	3.7901e-13	0.34635	0.28748	0	0.334068	0.293311	3.7901e-13	0.316228
ABO4g		1	1	1	0.987656	1	0.764569	0.680027	0.848627	0.598473	0.594647	0.909091	1	1	0.580073	0.909091	1	0.540185	0.879473	1	0.5		0	0	0	0.0328701	0	0.345435	0.358354	0.311613	0.350697	0.350265	0.28748	3.7901e-13	3.7901e-13	0.34635	0.28748	0	0.334068	0.293311	3.7901e-13	0.316228
ABO5g		1	1	1	0.987656	1	0.764569	0.680027	0.848627	0.598473	0.594647	0.909091	1	1	0.580073	0.909091	1	0.540185	0.879473	1	0.5		0	0	0	0.0328701	0	0.345435	0.358354	0.311613	0.350697	0.350265	0.28748	3.7901e-13	3.7901e-13	0.34635	0.28748	0	0.334068	0.293311	3.7901e-13	0.316228
ABO6g		1	1	1	0.987656	1	0.764569	0.680027	0.848627	0.598473	0.594647	0.909091	1	1	0.580073	0.909091	1	0.540185	0.879473	1	0.5		0	0	0	0.0328701	0	0.345435	0.358354	0.311613	0.350697	0.350265	0.28748	3.7901e-13	3.7901e-13	0.34635	0.28748	0	0.334068	0.293311	3.7901e-13	0.316228
ABO7g		1	1	1	0.987656	1	0.764569	0.680027	0.848627	0.598473	0.594647	0.909091	1	1	0.580073	0.909091	1	0.540185	0.879473	1	0.5		0	0	0	0.0328701	0	0.345435	0.358354	0.311613	0.350697	0.350265	0.28748	3.7901e-13	3.7901e-13	0.34635	0.28748	0	0.334068	0.293311	3.7901e-13	0.316228
ABO8g		1	1	1	0.987656	1	0.764569	0.680027	0.848627	0.598473	0.594647	0.909091	1	1	0.580073	0.909091	1	0.540185	0.879473	1	0.5		0	0	0	0.0328701	0	0.345435	0.358354	0.311613	0.350697	0.350265	0.28748	3.7901e-13	3.7901e-13	0.34635	0.28748	0	0.334068	0.293311	3.7901e-13	0.316228
ABO9g		1	1	1	0.987656	1	0.764569	0.680027	0.848627	0.598473	0.594647	0.909091	1	1	0.580073	0.909091	1	0.540185	0.879473	1	0.5		0	0	0	0.0328701	0	0.345435	0.358354	0.311613	0.350697	0.350265	0.28748	3.7901e-13	3.7901e-13	0.34635	0.28748	0	0.334068	0.293311	3.7901e-13	0.316228
ABTArm		1	1	1	0.987656	1	0.764569	0.680027	0.848468	0.598473	0.594647	0.909091	0.962402	0.963418	0.580073	0.909091	1	0.540185	0.879473	0.963327	0.5		0	0	0	0.0328701	0	0.345435	0.358354	0.311592	0.350697	0.350265	0.28748	0.118896	0.115682	0.34635	0.28748	0	0.334068	0.293311	0.115969	0.316228
ABTD		1	1	1	0.987656	1	0.764569	0.680027	0.848627	0.598473	0.594647	0.909091	0.958199	0.958199	0.580073	0.909091	1	0.540185	0.879473	0.958199	0.5		0	0	0	0.0328701	0	0.345435	0.358354	0.311613	0.350697	0.350265	0.28748	0.132186	0.132186	0.34635	0.28748	0	0.334068	0.293311	0.132186	0.316228
ABTti		1	1	1	0.987656	1	0.764569	0.680027	0.848627	0.598473	0.594647	0.909091	0.958199	0.958199	0.580073	0.909091	1	0.540185	0.879473	0.958199	0.5		0	0	0	0.0328701	0	0.345435	0.358354	0.311613	0.350697	0.350265	0.28748	0.132186	0.132186	0.34635	0.28748	0	0.334068	0.293311	0.132186	0.316228
ABUTD		1	1	1	0.987656	1	0.764569	0.680027	0.84756	0.598473	0.594647	0.909091	0.956961	0.956961	0.580073	0.909091	1	0.540185	0.879473	0.956961	0.5		0	0	0	0.0328701	0	0.345435	0.358354	0.312485	0.350697	0.350265	0.28748	0.1361	0.1361	0.34635	0.28748	0	0.334068	0.293311	0.1361	0.316228
ABUTt2r		1	1	1	0.987656	1	0.764569	0.680027	0.848627	0.598473	0.594647	0.909091	1	1	0.580073	0.909091	1	0.540185	0.879473	1	0.5		0	0	0	0.0328701	0	0.345435	0.358354	0.311613	0.350697	0.350265	0.28748	3.7901e-13	3.7901e-13	0.34635	0.28748	0	0.334068	0.293311	3.7901e-13	0.316228
ABUTt2rL		1	1	1	0.987656	1	0.764569	0.680027	0.848627	0.598473	0.594647	0.909091	1	1	0.580073	0.909091	1	0.540185	0.879473	1	0.5		0	0	0	0.0328701	0	0.345435	0.358354	0.311613	0.350697	0.350265	0.28748	3.7901e-13	3.7901e-13	0.34635	0.28748	0	0.334068	0.293311	3.7901e-13	0.316228
ABUTt4(2)r		1	1	1	0.987656	1	0.764569	0.680027	0.848627	0.598473	0.594647	0.909091	1	1	0.580073	0.909091	1	0.540185	0.879473	1	0.5		0	0	0	0.0328701	0	0.345435	0.358354	0.311613	0.350697	0.350265	0.28748	3.7901e-13	3.7901e-13	0.34635	0.28748	0	0.334068	0.293311	3.7901e-13	0.316228
ACACT1		1	1	1	0.987656	1	0.764569	0.680027	0.848627	0.598473	0.594647	0.909091	1	1	0.580073	0.909091	1	0.540185	0.879473	1	0.5		0	0	0	0.0328701	0	0.345435	0.358354	0.311613	0.350697	0.350265	0.28748	3.7901e-13	3.7901e-13	0.34635	0.28748	0	0.334068	0.293311	3.7901e-13	0.316228
ACACT10m		1	1	1	0.987656	1	0.764569	0.680027	0.848627	0.598473	0.594647	0.909091	1	1	0.580073	0.909091	1	0.540185	0.879473	1	0.5		0	0	0	0.0328701	0	0.345435	0.358354	0.311613	0.350697	0.350265	0.28748	3.7901e-13	3.7901e-13	0.34635	0.28748	0	0.334068	0.293311	3.7901e-13	0.316228
ACACT1r		1	1	1	0.987656	1	0.764569	0.680027	0.848627	0.598473	0.594647	0.909091	0.954545	0.954545	0.580073	0.909091	1	0.540185	0.879473	0.954545	0.5		0	0	0	0.0328701	0	0.345435	0.358354	0.311613	0.350697	0.350265	0.28748	0.14374	0.14374	0.34635	0.28748	0	0.334068	0.293311	0.14374	0.316228
ACACT1rm		1	1	1	0.987656	1	0.764569	0.680027	0.848627	0.598473	0.594647	0.909091	0.954545	0.954545	0.580073	0.909091	1	0.540185	0.879473	0.954545	0.5		0	0	0	0.0328701	0	0.345435	0.358354	0.311613	0.350697	0.350265	0.28748	0.14374	0.14374	0.34635	0.28748	0	0.334068	0.293311	0.14374	0.316228
ACACT1x		1	1	1	0.987656	1	0.764569	0.680027	0.848627	0.598473	0.594647	0.909091	1	1	0.580073	0.909091	1	0.540185	0.879473	1	0.5		0	0	0	0.0328701	0	0.345435	0.358354	0.311613	0.350697	0.350265	0.28748	3.7901e-13	3.7901e-13	0.34635	0.28748	0	0.334068	0.293311	3.7901e-13	0.316228
ACACT4p		1	1	1	0.987656	1	0.764569	0.680027	0.848627	0.598473	0.594647	0.909091	1	1	0.580073	0.909091	1	0.540185	0.879473	1	0.5		0	0	0	0.0328701	0	0.345435	0.358354	0.311613	0.350697	0.350265	0.28748	3.7901e-13	3.7901e-13	0.34635	0.28748	0	0.334068	0.293311	3.7901e-13	0.316228
ACACT5p		1	1	1	0.987656	1	0.764569	0.680027	0.848627	0.598473	0.594647	0.909091	1	1	0.580073	0.909091	1	0.540185	0.879473	1	0.5		0	0	0	0.0328701	0	0.345435	0.358354	0.311613	0.350697	0.350265	0.28748	3.7901e-13	3.7901e-13	0.34635	0.28748	0	0.334068	0.293311	3.7901e-13	0.316228
ACACT6p		1	1	1	0.987656	1	0.764569	0.680027	0.848627	0.598473	0.594647	0.909091	1	1	0.580073	0.909091	1	0.540185	0.879473	1	0.5		0	0	0	0.0328701	0	0.345435	0.358354	0.311613	0.350697	0.350265	0.28748	3.7901e-13	3.7901e-13	0.34635	0.28748	0	0.334068	0.293311	3.7901e-13	0.316228
ACACT7p		1	1	1	0.987656	1	0.764569	0.680027	0.848627	0.598473	0.594647	0.909091	1	1	0.580073	0.909091	1	0.540185	0.879473	1	0.5		0	0	0	0.0328701	0	0.345435	0.358354	0.311613	0.350697	0.350265	0.28748	3.7901e-13	3.7901e-13	0.34635	0.28748	0	0.334068	0.293311	3.7901e-13	0.316228
ACACT8p		1	1	1	0.987656	1	0.764569	0.680027	0.848627	0.598473	0.594647	0.909091	1	1	0.580073	0.909091	1	0.540185	0.879473	1	0.5		0	0	0	0.0328701	0	0.345435	0.358354	0.311613	0.350697	0.350265	0.28748	3.7901e-13	3.7901e-13	0.34635	0.28748	0	0.334068	0.293311	3.7901e-13	0.316228
ACACT9p		1	1	1	0.987656	1	0.764569	0.680027	0.848627	0.598473	0.594647	0.909091	1	1	0.580073	0.909091	1	0.540185	0.879473	1	0.5		0	0	0	0.0328701	0	0.345435	0.358354	0.311613	0.350697	0.350265	0.28748	3.7901e-13	3.7901e-13	0.34635	0.28748	0	0.334068	0.293311	3.7901e-13	0.316228
ACACt2		1	1	1	0.987656	1	0.764569	0.680027	0.848627	0.598473	0.594647	0.909091	0.954545	0.954545	0.580073	0.909091	1	0.540185	0.879473	0.954545	0.5		0	0	0	0.0328701	0	0.345435	0.358354	0.311613	0.350697	0.350265	0.28748	0.14374	0.14374	0.34635	0.28748	0	0.334068	0.293311	0.14374	0.316228
ACACt2m		1	1	1	0.987656	1	0.764569	0.680027	0.846827	0.598473	0.594647	0.909091	0.954545	0.954545	0.580073	0.909091	1	0.540185	0.879473	0.954545	0.5		0	0	0	0.0328701	0	0.345435	0.358354	0.312235	0.350697	0.350265	0.28748	0.14374	0.14374	0.34635	0.28748	0	0.334068	0.293311	0.14374	0.316228
ACACtx		1	1	1	0.987656	1	0.764569	0.680027	0.848627	0.598473	0.594647	0.909091	0.959287	0.959769	0.580073	0.909091	1	0.540185	0.879473	0.959221	0.5		0	0	0	0.0328701	0	0.345435	0.358354	0.311613	0.350697	0.350265	0.28748	0.128746	0.12722	0.34635	0.28748	0	0.334068	0.293311	0.128953	0.316228
ACALDt		1	1	1	0.987656	1	0.764569	0.680027	0.848627	0.598473	0.594647	0.909091	1	1	0.580073	0.909091	1	0.540185	0.879473	1	0.5		0	0	0	0.0328701	0	0.345435	0.358354	0.311613	0.350697	0.350265	0.28748	3.7901e-13	3.7901e-13	0.34635	0.28748	0	0.334068	0.293311	3.7901e-13	0.316228
ACALDtm		1	1	1	0.987656	1	0.764569	0.680027	0.848627	0.598473	0.594647	0.909091	1	1	0.580073	0.909091	1	0.540185	0.879473	1	0.5		0	0	0	0.0328701	0	0.345435	0.358354	0.311613	0.350697	0.350265	0.28748	3.7901e-13	3.7901e-13	0.34635	0.28748	0	0.334068	0.293311	3.7901e-13	0.316228
ACALDtr		1	1	1	0.987656	1	0.764569	0.680027	0.848627	0.598473	0.594647	0.909091	1	1	0.580073	0.909091	1	0.540185	0.879473	1	0.5		0	0	0	0.0328701	0	0.345435	0.358354	0.311613	0.350697	0.350265	0.28748	3.7901e-13	3.7901e-13	0.34635	0.28748	0	0.334068	0.293311	3.7901e-13	0.316228
ACALDtx		1	1	1	0.987656	1	0.764569	0.680027	0.848627	0.598473	0.594647	0.909091	1	1	0.580073	0.909091	1	0.540185	0.879473	1	0.5		0	0	0	0.0328701	0	0.345435	0.358354	0.311613	0.350697	0.350265	0.28748	3.7901e-13	3.7901e-13	0.34635	0.28748	0	0.334068	0.293311	3.7901e-13	0.316228
ACCOAC		1	1	1	0.987656	1	0.764569	0.680027	0.848627	0.598473	0.594647	0.909091	0.954545	0.954545	0.580073	0.909091	1	0.540185	0.879473	0.954545	0.5		0	0	0	0.0328701	0	0.345435	0.358354	0.311613	0.350697	0.350265	0.28748	0.14374	0.14374	0.34635	0.28748	0	0.334068	0.293311	0.14374	0.316228
ACCOACm		1	1	1	0.987656	1	0.764569	0.680027	0.848627	0.598473	0.594647	0.909091	0.954545	0.954545	0.580073	0.909091	1	0.540185	0.879473	0.954545	0.5		0	0	0	0.0328701	0	0.345435	0.358354	0.311613	0.350697	0.350265	0.28748	0.14374	0.14374	0.34635	0.28748	0	0.334068	0.293311	0.14374	0.316228
ACCOAL		1	1	1	0.987656	1	0.764569	0.680027	0.848627	0.598473	0.594647	0.909091	1	1	0.580073	0.909091	1	0.540185	0.879473	1	0.5		0	0	0	0.0328701	0	0.345435	0.358354	0.311613	0.350697	0.350265	0.28748	3.7901e-13	3.7901e-13	0.34635	0.28748	0	0.334068	0.293311	3.7901e-13	0.316228
ACCOALm		1	1	1	0.987656	1	0.764569	0.680027	0.848627	0.598473	0.594647	0.909091	1	1	0.580073	0.909091	1	0.540185	0.879473	1	0.5		0	0	0	0.0328701	0	0.345435	0.358354	0.311613	0.350697	0.350265	0.28748	3.7901e-13	3.7901e-13	0.34635	0.28748	0	0.334068	0.293311	3.7901e-13	0.316228
ACCOAgt		1	1	1	0.987656	1	0.764569	0.680027	0.848627	0.598473	0.594647	0.909091	1	1	0.580073	0.909091	1	0.540185	0.879473	1	0.5		0	0	0	0.0328701	0	0.345435	0.358354	0.311613	0.350697	0.350265	0.28748	3.7901e-13	3.7901e-13	0.34635	0.28748	0	0.334068	0.293311	3.7901e-13	0.316228
ACCOAtn		1	1	1	0.987656	1	0.764569	0.680027	0.848627	0.598473	0.594647	0.909091	1	1	0.580073	0.909091	1	0.540185	0.879473	1	0.5		0	0	0	0.0328701	0	0.345435	0.358354	0.311613	0.350697	0.350265	0.28748	3.7901e-13	3.7901e-13	0.34635	0.28748	0	0.334068	0.293311	3.7901e-13	0.316228
ACCOAtr		1	1	1	0.987656	1	0.764569	0.680027	0.848627	0.598473	0.594647	0.909091	1	1	0.580073	0.909091	1	0.540185	0.879473	1	0.5		0	0	0	0.0328701	0	0.345435	0.358354	0.311613	0.350697	0.350265	0.28748	3.7901e-13	3.7901e-13	0.34635	0.28748	0	0.334068	0.293311	3.7901e-13	0.316228
ACETONEt2		1	1	1	0.987656	1	0.764569	0.680027	0.848627	0.598473	0.594647	0.909091	0.954545	0.954545	0.580073	0.909091	1	0.540185	0.879473	0.954545	0.5		0	0	0	0.0328701	0	0.345435	0.358354	0.311613	0.350697	0.350265	0.28748	0.14374	0.14374	0.34635	0.28748	0	0.334068	0.293311	0.14374	0.316228
ACETONEt2m		1	1	1	0.987656	1	0.764569	0.680027	0.848627	0.598473	0.594647	0.909091	0.954545	0.954545	0.580073	0.909091	1	0.540185	0.879473	0.954545	0.5		0	0	0	0.0328701	0	0.345435	0.358354	0.311613	0.350697	0.350265	0.28748	0.14374	0.14374	0.34635	0.28748	0	0.334068	0.293311	0.14374	0.316228
ACGAGBSIDEtg		1	1	1	0.987656	1	0.764569	0.680027	0.848627	0.598473	0.594647	0.909091	1	1	0.580073	0.909091	1	0.540185	0.879473	1	0.5		0	0	0	0.0328701	0	0.345435	0.358354	0.311613	0.350697	0.350265	0.28748	3.7901e-13	3.7901e-13	0.34635	0.28748	0	0.334068	0.293311	3.7901e-13	0.316228
ACGAGBSIDEtl		1	1	1	0.987656	1	0.764569	0.680027	0.848627	0.598473	0.594647	0.909091	1	1	0.580073	0.909091	1	0.540185	0.879473	1	0.5		0	0	0	0.0328701	0	0.345435	0.358354	0.311613	0.350697	0.350265	0.28748	3.7901e-13	3.7901e-13	0.34635	0.28748	0	0.334068	0.293311	3.7901e-13	0.316228
ACGALFUCGALACGALFUC12GAL14ACGLCGALGLUSIDEte		1	1	1	0.987656	1	0.764569	0.680027	0.848627	0.598473	0.594647	0.909091	1	1	0.580073	0.909091	1	0.540185	0.879473	1	0.5		0	0	0	0.0328701	0	0.345435	0.358354	0.311613	0.350697	0.350265	0.28748	3.7901e-13	3.7901e-13	0.34635	0.28748	0	0.334068	0.293311	3.7901e-13	0.316228
ACGALFUCGALACGALFUC12GAL14ACGLCGALGLUSIDEtg		1	1	1	0.987656	1	0.764569	0.680027	0.848627	0.598473	0.594647	0.909091	1	1	0.580073	0.909091	1	0.540185	0.879473	1	0.5		0	0	0	0.0328701	0	0.345435	0.358354	0.311613	0.350697	0.350265	0.28748	3.7901e-13	3.7901e-13	0.34635	0.28748	0	0.334068	0.293311	3.7901e-13	0.316228
ACGALFUCGALACGALFUCGALACGLCGAL14ACGLCGALGLUSIDEte		1	1	1	0.987656	1	0.764569	0.680027	0.848627	0.598473	0.594647	0.909091	1	1	0.580073	0.909091	1	0.540185	0.879473	1	0.5		0	0	0	0.0328701	0	0.345435	0.358354	0.311613	0.350697	0.350265	0.28748	3.7901e-13	3.7901e-13	0.34635	0.28748	0	0.334068	0.293311	3.7901e-13	0.316228
ACGALFUCGALACGALFUCGALACGLCGAL14ACGLCGALGLUSIDEtg		1	1	1	0.987656	1	0.764569	0.680027	0.848627	0.598473	0.594647	0.909091	1	1	0.580073	0.909091	1	0.540185	0.879473	1	0.5		0	0	0	0.0328701	0	0.345435	0.358354	0.311613	0.350697	0.350265	0.28748	3.7901e-13	3.7901e-13	0.34635	0.28748	0	0.334068	0.293311	3.7901e-13	0.316228
ACGALtly		1	1	1	0.987656	1	0.764569	0.680027	0.848627	0.598473	0.594647	0.909091	1	1	0.580073	0.909091	1	0.540185	0.879473	1	0.5		0	0	0	0.0328701	0	0.345435	0.358354	0.311613	0.350697	0.350265	0.28748	3.7901e-13	3.7901e-13	0.34635	0.28748	0	0.334068	0.293311	3.7901e-13	0.316228
ACGAM2E		1	1	1	0.987656	1	0.764569	0.680027	0.848627	0.598473	0.594647	0.909091	1	1	0.580073	0.909091	1	0.540185	0.879473	1	0.5		0	0	0	0.0328701	0	0.345435	0.358354	0.311613	0.350697	0.350265	0.28748	3.7901e-13	3.7901e-13	0.34635	0.28748	0	0.334068	0.293311	3.7901e-13	0.316228
ACGAM6PSi		1	1	1	0.987656	1	0.764569	0.680027	0.848627	0.598473	0.594647	0.909091	0.959005	0.95929	0.580073	0.909091	1	0.540185	0.879473	0.959005	0.5		0	0	0	0.0328701	0	0.345435	0.358354	0.311613	0.350697	0.350265	0.28748	0.129638	0.128735	0.34635	0.28748	0	0.334068	0.293311	0.129638	0.316228
ACGAMK		1	1	1	0.987656	1	0.764569	0.680027	0.848627	0.598473	0.594647	0.909091	0.954545	0.954545	0.580073	0.909091	1	0.540185	0.879473	0.954545	0.5		0	0	0	0.0328701	0	0.345435	0.358354	0.311613	0.350697	0.350265	0.28748	0.14374	0.14374	0.34635	0.28748	0	0.334068	0.293311	0.14374	0.316228
ACGAMPM		1	1	1	0.987656	1	0.764569	0.680027	0.848627	0.598473	0.594647	0.909091	0.954545	0.954545	0.580073	0.909091	1	0.540185	0.879473	0.954545	0.5		0	0	0	0.0328701	0	0.345435	0.358354	0.311613	0.350697	0.350265	0.28748	0.14374	0.14374	0.34635	0.28748	0	0.334068	0.293311	0.14374	0.316228
ACGAMtly		1	1	1	0.987656	1	0.764569	0.680027	0.848627	0.598473	0.594647	0.909091	0.954545	0.954545	0.580073	0.909091	1	0.540185	0.879473	0.954545	0.5		0	0	0	0.0328701	0	0.345435	0.358354	0.311613	0.350697	0.350265	0.28748	0.14374	0.14374	0.34635	0.28748	0	0.334068	0.293311	0.14374	0.316228
ACGPID		1	1	1	0.987656	1	0.764569	0.680027	0.848627	0.598473	0.594647	0.909091	1	1	0.580073	0.909091	1	0.540185	0.879473	1	0.5		0	0	0	0.0328701	0	0.345435	0.358354	0.311613	0.350697	0.350265	0.28748	3.7901e-13	3.7901e-13	0.34635	0.28748	0	0.334068	0.293311	3.7901e-13	0.316228
ACHEe		1	1	1	0.987656	1	0.764569	0.680027	0.848627	0.598473	0.594647	0.909091	1	1	0.580073	0.909091	1	0.540185	0.879473	1	0.5		0	0	0	0.0328701	0	0.345435	0.358354	0.311613	0.350697	0.350265	0.28748	3.7901e-13	3.7901e-13	0.34635	0.28748	0	0.334068	0.293311	3.7901e-13	0.316228
ACHVESSEC		1	1	1	0.987656	1	0.764569	0.680027	0.848627	0.598473	0.594647	0.909091	1	1	0.580073	0.909091	1	0.540185	0.879473	1	0.5		0	0	0	0.0328701	0	0.345435	0.358354	0.311613	0.350697	0.350265	0.28748	3.7901e-13	3.7901e-13	0.34635	0.28748	0	0.334068	0.293311	3.7901e-13	0.316228
ACITL		1	1	1	0.987656	1	0.764569	0.680027	0.848627	0.598473	0.594647	0.909091	0.954545	0.954545	0.580073	0.909091	1	0.540185	0.879473	0.954545	0.5		0	0	0	0.0328701	0	0.345435	0.358354	0.311613	0.350697	0.350265	0.28748	0.14374	0.14374	0.34635	0.28748	0	0.334068	0.293311	0.14374	0.316228
ACN13ACNGALGBSIDEte		1	1	1	0.987656	1	0.764569	0.680027	0.848627	0.598473	0.594647	0.909091	1	1	0.580073	0.909091	1	0.540185	0.879473	1	0.5		0	0	0	0.0328701	0	0.345435	0.358354	0.311613	0.350697	0.350265	0.28748	3.7901e-13	3.7901e-13	0.34635	0.28748	0	0.334068	0.293311	3.7901e-13	0.316228
ACN13ACNGALGBSIDEtg		1	1	1	0.987656	1	0.764569	0.680027	0.848627	0.598473	0.594647	0.909091	1	1	0.580073	0.909091	1	0.540185	0.879473	1	0.5		0	0	0	0.0328701	0	0.345435	0.358354	0.311613	0.350697	0.350265	0.28748	3.7901e-13	3.7901e-13	0.34635	0.28748	0	0.334068	0.293311	3.7901e-13	0.316228
ACN23ACNGALGBSIDEte		1	1	1	0.987656	1	0.764569	0.680027	0.848627	0.598473	0.594647	0.909091	1	1	0.580073	0.909091	1	0.540185	0.879473	1	0.5		0	0	0	0.0328701	0	0.345435	0.358354	0.311613	0.350697	0.350265	0.28748	3.7901e-13	3.7901e-13	0.34635	0.28748	0	0.334068	0.293311	3.7901e-13	0.316228
ACN23ACNGALGBSIDEtg		1	1	1	0.987656	1	0.764569	0.680027	0.848627	0.598473	0.594647	0.909091	1	1	0.580073	0.909091	1	0.540185	0.879473	1	0.5		0	0	0	0.0328701	0	0.345435	0.358354	0.311613	0.350697	0.350265	0.28748	3.7901e-13	3.7901e-13	0.34635	0.28748	0	0.334068	0.293311	3.7901e-13	0.316228
ACNACNGAL14ACGLCGALGLUSIDEte		1	1	1	0.987656	1	0.764569	0.680027	0.848627	0.598473	0.594647	0.909091	1	1	0.580073	0.909091	1	0.540185	0.879473	1	0.5		0	0	0	0.0328701	0	0.345435	0.358354	0.311613	0.350697	0.350265	0.28748	3.7901e-13	3.7901e-13	0.34635	0.28748	0	0.334068	0.293311	3.7901e-13	0.316228
ACNACNGAL14ACGLCGALGLUSIDEtg		1	1	1	0.987656	1	0.764569	0.680027	0.848627	0.598473	0.594647	0.909091	1	1	0.580073	0.909091	1	0.540185	0.879473	1	0.5		0	0	0	0.0328701	0	0.345435	0.358354	0.311613	0.350697	0.350265	0.28748	3.7901e-13	3.7901e-13	0.34635	0.28748	0	0.334068	0.293311	3.7901e-13	0.316228
ACNACNGALGBSIDEte		1	1	1	0.987656	1	0.764569	0.680027	0.848627	0.598473	0.594647	0.909091	1	1	0.580073	0.909091	1	0.540185	0.879473	1	0.5		0	0	0	0.0328701	0	0.345435	0.358354	0.311613	0.350697	0.350265	0.28748	3.7901e-13	3.7901e-13	0.34635	0.28748	0	0.334068	0.293311	3.7901e-13	0.316228
ACNACNGALGBSIDEtg		1	1	1	0.987656	1	0.764569	0.680027	0.848627	0.598473	0.594647	0.909091	1	1	0.580073	0.909091	1	0.540185	0.879473	1	0.5		0	0	0	0.0328701	0	0.345435	0.358354	0.311613	0.350697	0.350265	0.28748	3.7901e-13	3.7901e-13	0.34635	0.28748	0	0.334068	0.293311	3.7901e-13	0.316228
ACNAM9PL		1	1	1	0.987656	1	0.764569	0.680027	0.848627	0.598473	0.594647	0.909091	0.955035	0.955035	0.580073	0.909091	1	0.540185	0.879473	0.955035	0.5		0	0	0	0.0328701	0	0.345435	0.358354	0.311613	0.350697	0.350265	0.28748	0.142192	0.142192	0.34635	0.28748	0	0.334068	0.293311	0.142192	0.316228
ACNAM9PL2		1	1	1	0.987656	1	0.764569	0.680027	0.848627	0.598473	0.594647	0.909091	0.955628	0.955824	0.580073	0.909091	1	0.540185	0.879473	0.955628	0.5		0	0	0	0.0328701	0	0.345435	0.358354	0.311613	0.350697	0.350265	0.28748	0.140317	0.139697	0.34635	0.28748	0	0.334068	0.293311	0.140317	0.316228
ACNAMPH		1	1	1	0.987656	1	0.764569	0.680027	0.848627	0.598473	0.594647	0.909091	0.955035	0.955035	0.580073	0.909091	1	0.540185	0.879473	0.955035	0.5		0	0	0	0.0328701	0	0.345435	0.358354	0.311613	0.350697	0.350265	0.28748	0.142192	0.142192	0.34635	0.28748	0	0.334068	0.293311	0.142192	0.316228
ACNAMlt		1	1	1	0.987656	1	0.764569	0.680027	0.848627	0.598473	0.594647	0.909091	0.954699	0.954699	0.580073	0.909091	1	0.540185	0.879473	0.954699	0.5		0	0	0	0.0328701	0	0.345435	0.358354	0.311613	0.350697	0.350265	0.28748	0.143255	0.143255	0.34635	0.28748	0	0.334068	0.293311	0.143255	0.316228
ACNAMtn		1	1	1	0.987656	1	0.764569	0.680027	0.848627	0.598473	0.594647	0.909091	0.954695	0.954695	0.580073	0.909091	1	0.540185	0.879473	0.954695	0.5		0	0	0	0.0328701	0	0.345435	0.358354	0.311613	0.350697	0.350265	0.28748	0.143268	0.143268	0.34635	0.28748	0	0.334068	0.293311	0.143268	0.316228
ACNGALACGLCGAL14ACGLCGALGLUSIDEte		1	1	1	0.987656	1	0.764569	0.680027	0.848627	0.598473	0.594647	0.909091	1	1	0.580073	0.909091	1	0.540185	0.879473	1	0.5		0	0	0	0.0328701	0	0.345435	0.358354	0.311613	0.350697	0.350265	0.28748	3.7901e-13	3.7901e-13	0.34635	0.28748	0	0.334068	0.293311	3.7901e-13	0.316228
ACNGALACGLCGAL14ACGLCGALGLUSIDEtg		1	1	1	0.987656	1	0.764569	0.680027	0.848627	0.598473	0.594647	0.909091	1	1	0.580073	0.909091	1	0.540185	0.879473	1	0.5		0	0	0	0.0328701	0	0.345435	0.358354	0.311613	0.350697	0.350265	0.28748	3.7901e-13	3.7901e-13	0.34635	0.28748	0	0.334068	0.293311	3.7901e-13	0.316228
ACNMLr		1	1	1	0.987656	1	0.764569	0.680027	0.848627	0.598473	0.594647	0.909091	0.955035	0.955035	0.580073	0.909091	1	0.540185	0.879473	0.955035	0.5		0	0	0	0.0328701	0	0.345435	0.358354	0.311613	0.350697	0.350265	0.28748	0.142192	0.142192	0.34635	0.28748	0	0.334068	0.293311	0.142192	0.316228
ACOAD10m		1	1	1	0.987656	1	0.764569	0.680027	0.848627	0.598473	0.594647	0.909091	1	1	0.580073	0.909091	1	0.540185	0.879473	1	0.5		0	0	0	0.0328701	0	0.345435	0.358354	0.311613	0.350697	0.350265	0.28748	3.7901e-13	3.7901e-13	0.34635	0.28748	0	0.334068	0.293311	3.7901e-13	0.316228
ACOAD1fm		1	1	1	0.987656	1	0.764569	0.680027	0.848627	0.598473	0.594647	0.909091	1	1	0.580073	0.909091	1	0.540185	0.879473	1	0.5		0	0	0	0.0328701	0	0.345435	0.358354	0.311613	0.350697	0.350265	0.28748	3.7901e-13	3.7901e-13	0.34635	0.28748	0	0.334068	0.293311	3.7901e-13	0.316228
ACOAD8m		1	1	1	0.98475	1	0.764569	0.680027	0.848627	0.598473	0.594647	0.909091	0.954545	0.954545	0.580073	0.909091	1	0.540185	0.879473	0.954545	0.5		0	0	0	0.0377875	0	0.345435	0.358354	0.311613	0.350697	0.350265	0.28748	0.14374	0.14374	0.34635	0.28748	0	0.334068	0.293311	0.14374	0.316228
ACOAD9m		0.968652	0.968652	0.900948	0.942344	0.968652	0.740486	0.638094	0.778399	0.543686	0.586097	0.900541	0.926047	0.926047	0.524362	0.880593	0.968652	0.535012	0.845831	0.926047	0.49715		1.11022e-16	1.11022e-16	0.080977	0.0515983	1.11022e-16	0.334621	0.345666	0.310896	0.327038	0.340514	0.285105	0.134728	0.134728	0.320531	0.278468	1.11022e-16	0.327139	0.288974	0.134728	0.311819
ACOAHi		1	1	1	0.987656	1	0.764569	0.680027	0.848627	0.598473	0.594647	0.909091	0.954545	0.954545	0.580073	0.909091	1	0.540185	0.879473	0.954545	0.5		0	0	0	0.0328701	0	0.345435	0.358354	0.311613	0.350697	0.350265	0.28748	0.14374	0.14374	0.34635	0.28748	0	0.334068	0.293311	0.14374	0.316228
ACOAO7p		1	1	1	0.987656	1	0.764569	0.680027	0.835745	0.598473	0.594647	0.909091	0.954545	0.954545	0.580073	0.909091	1	0.540185	0.879473	0.954545	0.5		0	0	0	0.0328701	0	0.345435	0.358354	0.317345	0.350697	0.350265	0.28748	0.14374	0.14374	0.34635	0.28748	0	0.334068	0.293311	0.14374	0.316228
ACOATA		1	1	1	0.987656	1	0.764569	0.680027	0.848627	0.598473	0.594647	0.909091	1	1	0.580073	0.909091	1	0.540185	0.879473	1	0.5		0	0	0	0.0328701	0	0.345435	0.358354	0.311613	0.350697	0.350265	0.28748	3.7901e-13	3.7901e-13	0.34635	0.28748	0	0.334068	0.293311	3.7901e-13	0.316228
ACODA		1	1	1	0.987656	1	0.764569	0.680027	0.848627	0.598473	0.594647	0.909091	1	1	0.580073	0.909091	1	0.540185	0.879473	1	0.5		0	0	0	0.0328701	0	0.345435	0.358354	0.311613	0.350697	0.350265	0.28748	3.7901e-13	3.7901e-13	0.34635	0.28748	0	0.334068	0.293311	3.7901e-13	0.316228
ACONT		1	1	1	0.987656	1	0.764569	0.680027	0.848627	0.598473	0.594647	0.909091	0.955136	0.955136	0.580073	0.909091	1	0.540185	0.879473	0.955136	0.5		0	0	0	0.0328701	0	0.345435	0.358354	0.311613	0.350697	0.350265	0.28748	0.141874	0.141874	0.34635	0.28748	0	0.334068	0.293311	0.141874	0.316228
ACONTm		1	1	1	0.987656	1	0.764569	0.680027	0.843811	0.598473	0.594647	0.909091	0.954809	0.954853	0.580073	0.909091	1	0.540185	0.879473	0.954545	0.5		0	0	0	0.0328701	0	0.345435	0.358354	0.313451	0.350697	0.350265	0.28748	0.142906	0.142767	0.34635	0.28748	0	0.334068	0.293311	0.14374	0.316228
ACOX22x		1	1	1	0.987656	1	0.764569	0.680027	0.848627	0.598473	0.594647	0.909091	1	1	0.580073	0.909091	1	0.540185	0.879473	1	0.5		0	0	0	0.0328701	0	0.345435	0.358354	0.311613	0.350697	0.350265	0.28748	3.7901e-13	3.7901e-13	0.34635	0.28748	0	0.334068	0.293311	3.7901e-13	0.316228
ACOX2x		1	1	1	0.987656	1	0.764569	0.680027	0.848627	0.598473	0.594647	0.909091	1	1	0.580073	0.909091	1	0.540185	0.879473	1	0.5		0	0	0	0.0328701	0	0.345435	0.358354	0.311613	0.350697	0.350265	0.28748	3.7901e-13	3.7901e-13	0.34635	0.28748	0	0.334068	0.293311	3.7901e-13	0.316228
ACP1(FMN)		1	1	1	0.987656	1	0.764569	0.680027	0.848627	0.598473	0.594647	0.909091	0.954545	0.954545	0.580073	0.909091	1	0.540185	0.879473	0.954545	0.5		0	0	0	0.0328701	0	0.345435	0.358354	0.311613	0.350697	0.350265	0.28748	0.14374	0.14374	0.34635	0.28748	0	0.334068	0.293311	0.14374	0.316228
ACRNtm		1	1	1	0.987656	1	0.764569	0.680027	0.848627	0.598473	0.594647	0.909091	0.954545	0.954545	0.580073	0.909091	1	0.540185	0.879473	0.954545	0.5		0	0	0	0.0328701	0	0.345435	0.358354	0.311613	0.350697	0.350265	0.28748	0.14374	0.14374	0.34635	0.28748	0	0.334068	0.293311	0.14374	0.316228
ACS		1	1	1	0.987656	1	0.764569	0.680027	0.848627	0.598473	0.594647	0.909091	0.954545	0.954545	0.580073	0.909091	1	0.540185	0.879473	0.954545	0.5		0	0	0	0.0328701	0	0.345435	0.358354	0.311613	0.350697	0.350265	0.28748	0.14374	0.14374	0.34635	0.28748	0	0.334068	0.293311	0.14374	0.316228
ACS2		1	1	1	0.987656	1	0.764569	0.680027	0.848627	0.598473	0.594647	0.909091	1	1	0.580073	0.909091	1	0.540185	0.879473	1	0.5		0	0	0	0.0328701	0	0.345435	0.358354	0.311613	0.350697	0.350265	0.28748	3.7901e-13	3.7901e-13	0.34635	0.28748	0	0.334068	0.293311	3.7901e-13	0.316228
ACSm		1	1	1	0.987656	1	0.764569	0.680027	0.848627	0.598473	0.594647	0.909091	0.954545	0.954545	0.580073	0.909091	1	0.540185	0.879473	0.954545	0.5		0	0	0	0.0328701	0	0.345435	0.358354	0.311613	0.350697	0.350265	0.28748	0.14374	0.14374	0.34635	0.28748	0	0.334068	0.293311	0.14374	0.316228
ACTLMO		1	1	1	0.987656	1	0.764569	0.680027	0.835745	0.598473	0.594647	0.909091	0.954545	0.954545	0.580073	0.909091	1	0.540185	0.879473	0.954545	0.5		0	0	0	0.0328701	0	0.345435	0.358354	0.317345	0.350697	0.350265	0.28748	0.14374	0.14374	0.34635	0.28748	0	0.334068	0.293311	0.14374	0.316228
ACTNMO		1	1	1	0.987656	1	0.764569	0.680027	0.848627	0.598473	0.594647	0.909091	0.962818	0.961734	0.580073	0.909091	1	0.540185	0.879473	0.962458	0.5		0	0	0	0.0328701	0	0.345435	0.358354	0.311613	0.350697	0.350265	0.28748	0.117581	0.121009	0.34635	0.28748	0	0.334068	0.293311	0.118717	0.316228
ACYP		1	1	1	0.987656	1	0.764569	0.680027	0.848627	0.598473	0.594647	0.909091	0.954545	0.954545	0.580073	0.909091	1	0.540185	0.879473	0.954545	0.5		0	0	0	0.0328701	0	0.345435	0.358354	0.311613	0.350697	0.350265	0.28748	0.14374	0.14374	0.34635	0.28748	0	0.334068	0.293311	0.14374	0.316228
ACt2m		1	1	1	0.987656	1	0.764569	0.680027	0.848627	0.598473	0.594647	0.909091	0.954545	0.954545	0.580073	0.909091	1	0.540185	0.879473	0.954545	0.5		0	0	0	0.0328701	0	0.345435	0.358354	0.311613	0.350697	0.350265	0.28748	0.14374	0.14374	0.34635	0.28748	0	0.334068	0.293311	0.14374	0.316228
ACt2r		1	1	1	0.987656	1	0.764569	0.680027	0.848627	0.598473	0.594647	0.909091	0.954545	0.954545	0.580073	0.909091	1	0.540185	0.879473	0.954545	0.5		0	0	0	0.0328701	0	0.345435	0.358354	0.311613	0.350697	0.350265	0.28748	0.14374	0.14374	0.34635	0.28748	0	0.334068	0.293311	0.14374	0.316228
ACtg		1	1	1	0.987656	1	0.764569	0.680027	0.848627	0.598473	0.594647	0.909091	1	1	0.580073	0.909091	1	0.540185	0.879473	1	0.5		0	0	0	0.0328701	0	0.345435	0.358354	0.311613	0.350697	0.350265	0.28748	3.7901e-13	3.7901e-13	0.34635	0.28748	0	0.334068	0.293311	3.7901e-13	0.316228
ADA		1	1	1	0.987656	1	0.764569	0.680027	0.848627	0.598473	0.594647	0.909091	0.954785	0.954785	0.580073	0.909091	1	0.540185	0.879473	0.954785	0.5		0	0	0	0.0328701	0	0.345435	0.358354	0.311613	0.350697	0.350265	0.28748	0.142982	0.142982	0.34635	0.28748	0	0.334068	0.293311	0.142982	0.316228
ADAe		1	1	1	0.987656	1	0.764569	0.680027	0.848627	0.598473	0.594647	0.909091	0.954785	0.954785	0.580073	0.909091	1	0.540185	0.879473	0.954785	0.5		0	0	0	0.0328701	0	0.345435	0.358354	0.311613	0.350697	0.350265	0.28748	0.142982	0.142982	0.34635	0.28748	0	0.334068	0.293311	0.142982	0.316228
ADCim		1	1	1	0.987656	1	0.764569	0.680027	0.848627	0.598473	0.594647	0.909091	0.954545	0.954545	0.580073	0.909091	1	0.540185	0.879473	0.954545	0.5		0	0	0	0.0328701	0	0.345435	0.358354	0.311613	0.350697	0.350265	0.28748	0.14374	0.14374	0.34635	0.28748	0	0.334068	0.293311	0.14374	0.316228
ADEt		1	1	1	0.987656	1	0.764569	0.680027	0.815713	0.590283	0.594647	0.909091	0.954545	0.954545	0.571045	0.909091	1	0.540185	0.876902	0.954545	0.5		0	0	0	0.0328701	0	0.345435	0.358354	0.32077	0.348784	0.350265	0.28748	0.14374	0.14374	0.343571	0.28748	0	0.334068	0.295217	0.14374	0.316228
ADEtl		1	1	1	0.987656	1	0.764569	0.680027	0.848627	0.598473	0.594647	0.909091	1	1	0.580073	0.909091	1	0.540185	0.879473	1	0.5		0	0	0	0.0328701	0	0.345435	0.358354	0.311613	0.350697	0.350265	0.28748	3.7901e-13	3.7901e-13	0.34635	0.28748	0	0.334068	0.293311	3.7901e-13	0.316228
ADHAPtx		1	1	1	0.987656	1	0.764569	0.680027	0.848627	0.598473	0.594647	0.909091	1	1	0.580073	0.909091	1	0.540185	0.879473	1	0.5		0	0	0	0.0328701	0	0.345435	0.358354	0.311613	0.350697	0.350265	0.28748	3.7901e-13	3.7901e-13	0.34635	0.28748	0	0.334068	0.293311	3.7901e-13	0.316228
ADK1		1	1	1	0.987656	1	0.764569	0.680027	0.848627	0.598473	0.594647	0.909091	1	1	0.580073	0.909091	1	0.540185	0.879473	1	0.5		0	0	0	0.0328701	0	0.345435	0.358354	0.311613	0.350697	0.350265	0.28748	3.7901e-13	3.7901e-13	0.34635	0.28748	0	0.334068	0.293311	3.7901e-13	0.316228
ADK1m		1	1	1	0.987656	1	0.764569	0.680027	0.848627	0.598473	0.594647	0.909091	1	1	0.580073	0.909091	1	0.540185	0.879473	1	0.5		0	0	0	0.0328701	0	0.345435	0.358354	0.311613	0.350697	0.350265	0.28748	3.7901e-13	3.7901e-13	0.34635	0.28748	0	0.334068	0.293311	3.7901e-13	0.316228
ADK3		1	1	1	0.987656	1	0.764569	0.680027	0.848627	0.598473	0.594647	0.909091	1	1	0.580073	0.909091	1	0.540185	0.879473	1	0.5		0	0	0	0.0328701	0	0.345435	0.358354	0.311613	0.350697	0.350265	0.28748	3.7901e-13	3.7901e-13	0.34635	0.28748	0	0.334068	0.293311	3.7901e-13	0.316228
ADK3m		1	1	1	0.987656	1	0.764569	0.680027	0.848627	0.598473	0.594647	0.909091	1	1	0.580073	0.909091	1	0.540185	0.879473	1	0.5		0	0	0	0.0328701	0	0.345435	0.358354	0.311613	0.350697	0.350265	0.28748	3.7901e-13	3.7901e-13	0.34635	0.28748	0	0.334068	0.293311	3.7901e-13	0.316228
ADKd		1	1	1	0.987656	1	0.764569	0.680027	0.815713	0.590283	0.594647	0.909091	0.954545	0.954545	0.571045	0.909091	1	0.540185	0.876902	0.954545	0.5		0	0	0	0.0328701	0	0.345435	0.358354	0.32077	0.348784	0.350265	0.28748	0.14374	0.14374	0.343571	0.28748	0	0.334068	0.295217	0.14374	0.316228
ADMDC		1	1	1	0.987656	1	0.764569	0.680027	0.848627	0.598473	0.594647	0.909091	1	1	0.580073	0.909091	1	0.540185	0.879473	1	0.5		0	0	0	0.0328701	0	0.345435	0.358354	0.311613	0.350697	0.350265	0.28748	3.7901e-13	3.7901e-13	0.34635	0.28748	0	0.334068	0.293311	3.7901e-13	0.316228
ADNCYC		1	1	1	0.987656	1	0.764569	0.680027	0.848627	0.598473	0.594647	0.909091	0.954545	0.954545	0.580073	0.909091	1	0.540185	0.879473	0.954545	0.5		0	0	0	0.0328701	0	0.345435	0.358354	0.311613	0.350697	0.350265	0.28748	0.14374	0.14374	0.34635	0.28748	0	0.334068	0.293311	0.14374	0.316228
ADNK1		1	1	1	0.987656	1	0.764569	0.680027	0.848627	0.598473	0.594647	0.909091	0.954545	0.954545	0.580073	0.909091	1	0.540185	0.879473	0.954545	0.5		0	0	0	0.0328701	0	0.345435	0.358354	0.311613	0.350697	0.350265	0.28748	0.14374	0.14374	0.34635	0.28748	0	0.334068	0.293311	0.14374	0.316228
ADNK1m		1	1	1	0.987656	1	0.764569	0.680027	0.819951	0.598473	0.594647	0.909091	0.959534	0.959534	0.580073	0.909091	1	0.540185	0.879473	0.959534	0.5		0	0	0	0.0328701	0	0.345435	0.358354	0.321675	0.350697	0.350265	0.28748	0.127965	0.127965	0.34635	0.28748	0	0.334068	0.293311	0.127965	0.316228
ADNt		1	1	1	0.987656	1	0.764569	0.680027	0.848627	0.598473	0.594647	0.909091	1	1	0.580073	0.909091	1	0.540185	0.879473	1	0.5		0	0	0	0.0328701	0	0.345435	0.358354	0.311613	0.350697	0.350265	0.28748	3.7901e-13	3.7901e-13	0.34635	0.28748	0	0.334068	0.293311	3.7901e-13	0.316228
ADNt4		1	1	1	0.987656	1	0.764569	0.680027	0.848627	0.598473	0.594647	0.909091	1	1	0.580073	0.909091	1	0.540185	0.879473	1	0.5		0	0	0	0.0328701	0	0.345435	0.358354	0.311613	0.350697	0.350265	0.28748	3.7901e-13	3.7901e-13	0.34635	0.28748	0	0.334068	0.293311	3.7901e-13	0.316228
ADNt5		1	1	1	0.987656	1	0.764569	0.680027	0.848627	0.598473	0.594647	0.909091	1	1	0.580073	0.909091	1	0.540185	0.879473	1	0.5		0	0	0	0.0328701	0	0.345435	0.358354	0.311613	0.350697	0.350265	0.28748	3.7901e-13	3.7901e-13	0.34635	0.28748	0	0.334068	0.293311	3.7901e-13	0.316228
ADNtl		1	1	1	0.987656	1	0.764569	0.680027	0.848627	0.598473	0.594647	0.909091	1	1	0.580073	0.909091	1	0.540185	0.879473	1	0.5		0	0	0	0.0328701	0	0.345435	0.358354	0.311613	0.350697	0.350265	0.28748	3.7901e-13	3.7901e-13	0.34635	0.28748	0	0.334068	0.293311	3.7901e-13	0.316228
ADNtm		1	1	1	0.987656	1	0.764569	0.680027	0.819951	0.598473	0.594647	0.909091	0.959534	0.959534	0.580073	0.909091	1	0.540185	0.879473	0.959534	0.5		0	0	0	0.0328701	0	0.345435	0.358354	0.321675	0.350697	0.350265	0.28748	0.127965	0.127965	0.34635	0.28748	0	0.334068	0.293311	0.127965	0.316228
ADPGLC		1	1	1	0.987656	1	0.764569	0.680027	0.848627	0.598473	0.594647	0.909091	1	1	0.580073	0.909091	1	0.540185	0.879473	1	0.5		0	0	0	0.0328701	0	0.345435	0.358354	0.311613	0.350697	0.350265	0.28748	3.7901e-13	3.7901e-13	0.34635	0.28748	0	0.334068	0.293311	3.7901e-13	0.316228
ADPMAN		1	1	1	0.987656	1	0.764569	0.680027	0.848627	0.598473	0.594647	0.909091	1	1	0.580073	0.909091	1	0.540185	0.879473	1	0.5		0	0	0	0.0328701	0	0.345435	0.358354	0.311613	0.350697	0.350265	0.28748	3.7901e-13	3.7901e-13	0.34635	0.28748	0	0.334068	0.293311	3.7901e-13	0.316228
ADPRDP		1	1	1	0.987656	1	0.764569	0.680027	0.848627	0.598473	0.594647	0.909091	0.954545	0.954545	0.580073	0.909091	1	0.540185	0.879473	0.954545	0.5		0	0	0	0.0328701	0	0.345435	0.358354	0.311613	0.350697	0.350265	0.28748	0.14374	0.14374	0.34635	0.28748	0	0.334068	0.293311	0.14374	0.316228
ADPRDPm		1	1	1	0.987656	1	0.764569	0.680027	0.848627	0.598473	0.594647	0.909091	1	1	0.580073	0.909091	1	0.540185	0.879473	1	0.5		0	0	0	0.0328701	0	0.345435	0.358354	0.311613	0.350697	0.350265	0.28748	3.7901e-13	3.7901e-13	0.34635	0.28748	0	0.334068	0.293311	3.7901e-13	0.316228
ADPRIBt		1	1	1	0.987656	1	0.764569	0.680027	0.848627	0.598473	0.594647	0.909091	1	1	0.580073	0.909091	1	0.540185	0.879473	1	0.5		0	0	0	0.0328701	0	0.345435	0.358354	0.311613	0.350697	0.350265	0.28748	3.7901e-13	3.7901e-13	0.34635	0.28748	0	0.334068	0.293311	3.7901e-13	0.316228
ADPT		1	1	1	0.987656	1	0.764569	0.680027	0.848627	0.598473	0.594647	0.909091	0.954545	0.954545	0.580073	0.909091	1	0.540185	0.879473	0.954545	0.5		0	0	0	0.0328701	0	0.345435	0.358354	0.311613	0.350697	0.350265	0.28748	0.14374	0.14374	0.34635	0.28748	0	0.334068	0.293311	0.14374	0.316228
ADPtx		1	1	1	0.987656	1	0.764569	0.680027	0.848627	0.598473	0.594647	0.909091	0.956574	0.956474	0.580073	0.909091	1	0.540185	0.879473	0.956569	0.5		0	0	0	0.0328701	0	0.345435	0.358354	0.311613	0.350697	0.350265	0.28748	0.137325	0.13764	0.34635	0.28748	0	0.334068	0.293311	0.13734	0.316228
ADRNCOAtx		1	1	1	0.987656	1	0.764569	0.680027	0.848627	0.598473	0.594647	0.909091	1	1	0.580073	0.909091	1	0.540185	0.879473	1	0.5		0	0	0	0.0328701	0	0.345435	0.358354	0.311613	0.350697	0.350265	0.28748	3.7901e-13	3.7901e-13	0.34635	0.28748	0	0.334068	0.293311	3.7901e-13	0.316228
ADRNCPT1		1	1	1	0.987656	1	0.764569	0.680027	0.848627	0.598473	0.594647	0.909091	1	1	0.580073	0.909091	1	0.540185	0.879473	1	0.5		0	0	0	0.0328701	0	0.345435	0.358354	0.311613	0.350697	0.350265	0.28748	3.7901e-13	3.7901e-13	0.34635	0.28748	0	0.334068	0.293311	3.7901e-13	0.316228
ADRNCPT2		1	1	1	0.987656	1	0.764569	0.680027	0.848627	0.598473	0.594647	0.909091	1	1	0.580073	0.909091	1	0.540185	0.879473	1	0.5		0	0	0	0.0328701	0	0.345435	0.358354	0.311613	0.350697	0.350265	0.28748	3.7901e-13	3.7901e-13	0.34635	0.28748	0	0.334068	0.293311	3.7901e-13	0.316228
ADRNCRNt		1	1	1	0.987656	1	0.764569	0.680027	0.848627	0.598473	0.594647	0.909091	1	1	0.580073	0.909091	1	0.540185	0.879473	1	0.5		0	0	0	0.0328701	0	0.345435	0.358354	0.311613	0.350697	0.350265	0.28748	3.7901e-13	3.7901e-13	0.34635	0.28748	0	0.334068	0.293311	3.7901e-13	0.316228
ADRNLPVESSEC		1	1	1	0.987656	1	0.764569	0.680027	0.848627	0.598473	0.594647	0.909091	1	1	0.580073	0.909091	1	0.540185	0.879473	1	0.5		0	0	0	0.0328701	0	0.345435	0.358354	0.311613	0.350697	0.350265	0.28748	3.7901e-13	3.7901e-13	0.34635	0.28748	0	0.334068	0.293311	3.7901e-13	0.316228
ADRNt		1	1	1	0.987656	1	0.764569	0.680027	0.848627	0.598473	0.594647	0.909091	1	1	0.580073	0.909091	1	0.540185	0.879473	1	0.5		0	0	0	0.0328701	0	0.345435	0.358354	0.311613	0.350697	0.350265	0.28748	3.7901e-13	3.7901e-13	0.34635	0.28748	0	0.334068	0.293311	3.7901e-13	0.316228
ADSELK		1	1	1	0.987656	1	0.764569	0.680027	0.848627	0.598473	0.594647	0.909091	1	1	0.580073	0.909091	1	0.540185	0.879473	1	0.5		0	0	0	0.0328701	0	0.345435	0.358354	0.311613	0.350697	0.350265	0.28748	3.7901e-13	3.7901e-13	0.34635	0.28748	0	0.334068	0.293311	3.7901e-13	0.316228
ADSK		1	1	1	0.987656	1	0.764569	0.680027	0.848627	0.598473	0.594647	0.909091	0.954545	0.954545	0.580073	0.909091	1	0.540185	0.879473	0.954545	0.5		0	0	0	0.0328701	0	0.345435	0.358354	0.311613	0.350697	0.350265	0.28748	0.14374	0.14374	0.34635	0.28748	0	0.334068	0.293311	0.14374	0.316228
ADSL1		0.891749	0.891749	0.939059	0.868745	0.891749	0.681707	0.589181	0.720296	0.503574	0.548965	0.74446	0.856136	0.856136	0.485911	0.810681	0.891749	0.49772	0.779193	0.856136	0.456595		3.37388e-13	0	0.0559263	0.0456758	4.13817e-13	0.308053	0.318287	0.284879	0.302084	0.314299	0.245607	0.11262	0.11262	0.296293	0.25636	4.17134e-13	0.302538	0.265575	0.11262	0.28659
ADSL2		0.859308	0.859308	0.807401	0.837698	0.859308	0.656912	0.568547	0.695785	0.486652	0.528127	0.720452	0.826644	0.826644	0.46969	0.781189	0.859308	0.47887	0.751083	0.826644	0.439486		9.87055e-14	2.22045e-16	0.0620838	0.043184	5.06794e-14	0.296846	0.306741	0.273941	0.291562	0.302752	0.236701	0.103294	0.103294	0.286073	0.247034	6.01418e-14	0.291306	0.255707	0.103294	0.275948
ADSS		0.891749	0.891749	0.939059	0.868745	0.891749	0.681707	0.589181	0.720296	0.503574	0.548965	0.74446	0.856136	0.856136	0.485911	0.810681	0.891749	0.49772	0.779193	0.856136	0.456595		3.19332e-13	0	0.0559263	0.0456758	2.37874e-13	0.308053	0.318287	0.284879	0.302084	0.314299	0.245607	0.11262	0.11262	0.296293	0.25636	4.38061e-13	0.302538	0.265575	0.11262	0.28659
AFLATOXINte		1	1	1	0.987656	1	0.764569	0.680027	0.848627	0.598473	0.594647	0.909091	1	1	0.580073	0.909091	1	0.540185	0.879473	1	0.5		0	0	0	0.0328701	0	0.345435	0.358354	0.311613	0.350697	0.350265	0.28748	3.7901e-13	3.7901e-13	0.34635	0.28748	0	0.334068	0.293311	3.7901e-13	0.316228
AG13T10g		1	1	1	0.987656	1	0.764569	0.680027	0.848627	0.598473	0.594647	0.909091	1	1	0.580073	0.909091	1	0.540185	0.879473	1	0.5		0	0	0	0.0328701	0	0.345435	0.358354	0.311613	0.350697	0.350265	0.28748	3.7901e-13	3.7901e-13	0.34635	0.28748	0	0.334068	0.293311	3.7901e-13	0.316228
AG13T11g		1	1	1	0.987656	1	0.764569	0.680027	0.848627	0.598473	0.594647	0.909091	1	1	0.580073	0.909091	1	0.540185	0.879473	1	0.5		0	0	0	0.0328701	0	0.345435	0.358354	0.311613	0.350697	0.350265	0.28748	3.7901e-13	3.7901e-13	0.34635	0.28748	0	0.334068	0.293311	3.7901e-13	0.316228
AG13T12g		1	1	1	0.987656	1	0.764569	0.680027	0.848627	0.598473	0.594647	0.909091	1	1	0.580073	0.909091	1	0.540185	0.879473	1	0.5		0	0	0	0.0328701	0	0.345435	0.358354	0.311613	0.350697	0.350265	0.28748	3.7901e-13	3.7901e-13	0.34635	0.28748	0	0.334068	0.293311	3.7901e-13	0.316228
AG13T13g		1	1	1	0.987656	1	0.764569	0.680027	0.848627	0.598473	0.594647	0.909091	1	1	0.580073	0.909091	1	0.540185	0.879473	1	0.5		0	0	0	0.0328701	0	0.345435	0.358354	0.311613	0.350697	0.350265	0.28748	3.7901e-13	3.7901e-13	0.34635	0.28748	0	0.334068	0.293311	3.7901e-13	0.316228
AG13T14g		1	1	1	0.987656	1	0.764569	0.680027	0.848627	0.598473	0.594647	0.909091	1	1	0.580073	0.909091	1	0.540185	0.879473	1	0.5		0	0	0	0.0328701	0	0.345435	0.358354	0.311613	0.350697	0.350265	0.28748	3.7901e-13	3.7901e-13	0.34635	0.28748	0	0.334068	0.293311	3.7901e-13	0.316228
AG13T15g		1	1	1	0.987656	1	0.764569	0.680027	0.848627	0.598473	0.594647	0.909091	1	1	0.580073	0.909091	1	0.540185	0.879473	1	0.5		0	0	0	0.0328701	0	0.345435	0.358354	0.311613	0.350697	0.350265	0.28748	3.7901e-13	3.7901e-13	0.34635	0.28748	0	0.334068	0.293311	3.7901e-13	0.316228
AG13T16g		1	1	1	0.987656	1	0.764569	0.680027	0.848627	0.598473	0.594647	0.909091	1	1	0.580073	0.909091	1	0.540185	0.879473	1	0.5		0	0	0	0.0328701	0	0.345435	0.358354	0.311613	0.350697	0.350265	0.28748	3.7901e-13	3.7901e-13	0.34635	0.28748	0	0.334068	0.293311	3.7901e-13	0.316228
AG13T17g		1	1	1	0.987656	1	0.764569	0.680027	0.848627	0.598473	0.594647	0.909091	1	1	0.580073	0.909091	1	0.540185	0.879473	1	0.5		0	0	0	0.0328701	0	0.345435	0.358354	0.311613	0.350697	0.350265	0.28748	3.7901e-13	3.7901e-13	0.34635	0.28748	0	0.334068	0.293311	3.7901e-13	0.316228
AG13T18g		1	1	1	0.987656	1	0.764569	0.680027	0.848627	0.598473	0.594647	0.909091	1	1	0.580073	0.909091	1	0.540185	0.879473	1	0.5		0	0	0	0.0328701	0	0.345435	0.358354	0.311613	0.350697	0.350265	0.28748	3.7901e-13	3.7901e-13	0.34635	0.28748	0	0.334068	0.293311	3.7901e-13	0.316228
AG13T1g		1	1	1	0.987656	1	0.764569	0.680027	0.848627	0.598473	0.594647	0.909091	0.954699	0.954699	0.580073	0.909091	1	0.540185	0.879473	0.954699	0.5		0	0	0	0.0328701	0	0.345435	0.358354	0.311613	0.350697	0.350265	0.28748	0.143255	0.143255	0.34635	0.28748	0	0.334068	0.293311	0.143255	0.316228
AG13T2g		1	1	1	0.987656	1	0.764569	0.680027	0.848627	0.598473	0.594647	0.909091	0.954699	0.954699	0.580073	0.909091	1	0.540185	0.879473	0.954699	0.5		0	0	0	0.0328701	0	0.345435	0.358354	0.311613	0.350697	0.350265	0.28748	0.143255	0.143255	0.34635	0.28748	0	0.334068	0.293311	0.143255	0.316228
AG13T3g		1	1	1	0.987656	1	0.764569	0.680027	0.848627	0.598473	0.594647	0.909091	0.954699	0.954699	0.580073	0.909091	1	0.540185	0.879473	0.954699	0.5		0	0	0	0.0328701	0	0.345435	0.358354	0.311613	0.350697	0.350265	0.28748	0.143255	0.143255	0.34635	0.28748	0	0.334068	0.293311	0.143255	0.316228
AG13T4g		1	1	1	0.987656	1	0.764569	0.680027	0.848627	0.598473	0.594647	0.909091	1	1	0.580073	0.909091	1	0.540185	0.879473	1	0.5		0	0	0	0.0328701	0	0.345435	0.358354	0.311613	0.350697	0.350265	0.28748	3.7901e-13	3.7901e-13	0.34635	0.28748	0	0.334068	0.293311	3.7901e-13	0.316228
AG13T5g		1	1	1	0.987656	1	0.764569	0.680027	0.848627	0.598473	0.594647	0.909091	1	1	0.580073	0.909091	1	0.540185	0.879473	1	0.5		0	0	0	0.0328701	0	0.345435	0.358354	0.311613	0.350697	0.350265	0.28748	3.7901e-13	3.7901e-13	0.34635	0.28748	0	0.334068	0.293311	3.7901e-13	0.316228
AG13T6g		1	1	1	0.987656	1	0.764569	0.680027	0.848627	0.598473	0.594647	0.909091	1	1	0.580073	0.909091	1	0.540185	0.879473	1	0.5		0	0	0	0.0328701	0	0.345435	0.358354	0.311613	0.350697	0.350265	0.28748	3.7901e-13	3.7901e-13	0.34635	0.28748	0	0.334068	0.293311	3.7901e-13	0.316228
AG13T7g		1	1	1	0.987656	1	0.764569	0.680027	0.848627	0.598473	0.594647	0.909091	1	1	0.580073	0.909091	1	0.540185	0.879473	1	0.5		0	0	0	0.0328701	0	0.345435	0.358354	0.311613	0.350697	0.350265	0.28748	3.7901e-13	3.7901e-13	0.34635	0.28748	0	0.334068	0.293311	3.7901e-13	0.316228
AG13T8g		1	1	1	0.987656	1	0.764569	0.680027	0.848627	0.598473	0.594647	0.909091	1	1	0.580073	0.909091	1	0.540185	0.879473	1	0.5		0	0	0	0.0328701	0	0.345435	0.358354	0.311613	0.350697	0.350265	0.28748	3.7901e-13	3.7901e-13	0.34635	0.28748	0	0.334068	0.293311	3.7901e-13	0.316228
AG13T9g		1	1	1	0.987656	1	0.764569	0.680027	0.848627	0.598473	0.594647	0.909091	1	1	0.580073	0.909091	1	0.540185	0.879473	1	0.5		0	0	0	0.0328701	0	0.345435	0.358354	0.311613	0.350697	0.350265	0.28748	3.7901e-13	3.7901e-13	0.34635	0.28748	0	0.334068	0.293311	3.7901e-13	0.316228
AGLPC		1	1	1	0.987656	1	0.764569	0.680027	0.848627	0.598473	0.594647	0.909091	1	1	0.580073	0.909091	1	0.540185	0.879473	1	0.5		0	0	0	0.0328701	0	0.345435	0.358354	0.311613	0.350697	0.350265	0.28748	3.7901e-13	3.7901e-13	0.34635	0.28748	0	0.334068	0.293311	3.7901e-13	0.316228
AGLPED		1	1	1	0.987656	1	0.764569	0.680027	0.848627	0.598473	0.594647	0.909091	1	1	0.580073	0.909091	1	0.540185	0.879473	1	0.5		0	0	0	0.0328701	0	0.345435	0.358354	0.311613	0.350697	0.350265	0.28748	3.7901e-13	3.7901e-13	0.34635	0.28748	0	0.334068	0.293311	3.7901e-13	0.316228
AGLPET		1	1	1	0.987656	1	0.764569	0.680027	0.848627	0.598473	0.594647	0.909091	1	1	0.580073	0.909091	1	0.540185	0.879473	1	0.5		0	0	0	0.0328701	0	0.345435	0.358354	0.311613	0.350697	0.350265	0.28748	3.7901e-13	3.7901e-13	0.34635	0.28748	0	0.334068	0.293311	3.7901e-13	0.316228
AGLPH		1	1	1	0.987656	1	0.764569	0.680027	0.848627	0.598473	0.594647	0.909091	1	1	0.580073	0.909091	1	0.540185	0.879473	1	0.5		0	0	0	0.0328701	0	0.345435	0.358354	0.311613	0.350697	0.350265	0.28748	3.7901e-13	3.7901e-13	0.34635	0.28748	0	0.334068	0.293311	3.7901e-13	0.316228
AGLPR		1	1	1	0.987656	1	0.764569	0.680027	0.848627	0.598473	0.594647	0.909091	1	1	0.580073	0.909091	1	0.540185	0.879473	1	0.5		0	0	0	0.0328701	0	0.345435	0.358354	0.311613	0.350697	0.350265	0.28748	3.7901e-13	3.7901e-13	0.34635	0.28748	0	0.334068	0.293311	3.7901e-13	0.316228
AGLPT		1	1	1	0.987656	1	0.764569	0.680027	0.848627	0.598473	0.594647	0.909091	1	1	0.580073	0.909091	1	0.540185	0.879473	1	0.5		0	0	0	0.0328701	0	0.345435	0.358354	0.311613	0.350697	0.350265	0.28748	3.7901e-13	3.7901e-13	0.34635	0.28748	0	0.334068	0.293311	3.7901e-13	0.316228
AGMTm		1	1	1	0.987656	1	0.764569	0.680027	0.848627	0.598473	0.594647	0.909091	1	1	0.580073	0.909091	1	0.540185	0.879473	1	0.5		0	0	0	0.0328701	0	0.345435	0.358354	0.311613	0.350697	0.350265	0.28748	3.7901e-13	3.7901e-13	0.34635	0.28748	0	0.334068	0.293311	3.7901e-13	0.316228
AGPAT1		1	1	1	0.987656	1	0.764569	0.680027	0.848627	0.598473	0.594647	0.909091	1	1	0.580073	0.909091	1	0.540185	0.879473	1	0.5		0	0	0	0.0328701	0	0.345435	0.358354	0.311613	0.350697	0.350265	0.28748	3.7901e-13	3.7901e-13	0.34635	0.28748	0	0.334068	0.293311	3.7901e-13	0.316228
AGPRim		1	1	1	0.987656	1	0.764569	0.680027	0.848627	0.598473	0.594647	0.909091	1	1	0.580073	0.909091	1	0.540185	0.879473	1	0.5		0	0	0	0.0328701	0	0.345435	0.358354	0.311613	0.350697	0.350265	0.28748	3.7901e-13	3.7901e-13	0.34635	0.28748	0	0.334068	0.293311	3.7901e-13	0.316228
AGPSx		1	1	1	0.987656	1	0.764569	0.680027	0.848627	0.598473	0.594647	0.909091	1	1	0.580073	0.909091	1	0.540185	0.879473	1	0.5		0	0	0	0.0328701	0	0.345435	0.358354	0.311613	0.350697	0.350265	0.28748	3.7901e-13	3.7901e-13	0.34635	0.28748	0	0.334068	0.293311	3.7901e-13	0.316228
AGPex		1	1	1	0.987656	1	0.764569	0.680027	0.848627	0.598473	0.594647	0.909091	1	1	0.580073	0.909091	1	0.540185	0.879473	1	0.5		0	0	0	0.0328701	0	0.345435	0.358354	0.311613	0.350697	0.350265	0.28748	3.7901e-13	3.7901e-13	0.34635	0.28748	0	0.334068	0.293311	3.7901e-13	0.316228
AHANDROSTANGLCte		1	1	1	0.987656	1	0.764569	0.680027	0.848627	0.598473	0.594647	0.909091	1	1	0.580073	0.909091	1	0.540185	0.879473	1	0.5		0	0	0	0.0328701	0	0.345435	0.358354	0.311613	0.350697	0.350265	0.28748	3.7901e-13	3.7901e-13	0.34635	0.28748	0	0.334068	0.293311	3.7901e-13	0.316228
AHANDROSTANGLCtr		1	1	1	0.987656	1	0.764569	0.680027	0.848627	0.598473	0.594647	0.909091	1	1	0.580073	0.909091	1	0.540185	0.879473	1	0.5		0	0	0	0.0328701	0	0.345435	0.358354	0.311613	0.350697	0.350265	0.28748	3.7901e-13	3.7901e-13	0.34635	0.28748	0	0.334068	0.293311	3.7901e-13	0.316228
AHC		0.854756	0.854756	0.803506	0.882002	0.854756	0.653433	0.565652	0.692346	0.484278	0.525203	0.717084	0.822506	0.822506	0.467415	0.777051	0.854756	0.476225	0.747138	0.822506	0.437086		1.11022e-16	1.11022e-16	0.0612973	0.0515221	1.11022e-16	0.295274	0.305121	0.272409	0.290086	0.301132	0.235456	0.101985	0.101985	0.284639	0.245725	1.11022e-16	0.28973	0.254322	0.101985	0.274454
AHCYStn		1	1	1	0.987656	1	0.764569	0.680027	0.848627	0.598473	0.594647	0.909091	1	1	0.580073	0.909091	1	0.540185	0.879473	1	0.5		0	0	0	0.0328701	0	0.345435	0.358354	0.311613	0.350697	0.350265	0.28748	3.7901e-13	3.7901e-13	0.34635	0.28748	0	0.334068	0.293311	3.7901e-13	0.316228
AHCYStr		1	1	1	0.987634	1	0.764569	0.680027	0.848627	0.598473	0.594647	0.909091	0.955224	0.955224	0.580073	0.909091	1	0.540185	0.879473	0.955224	0.5		0	0	0	0.0329055	0	0.345435	0.358354	0.311613	0.350697	0.350265	0.28748	0.141595	0.141595	0.34635	0.28748	0	0.334068	0.293311	0.141595	0.316228
AHEXASE2ly		1	1	1	0.987656	1	0.764569	0.680027	0.848627	0.598473	0.594647	0.909091	0.954545	0.954545	0.580073	0.909091	1	0.540185	0.879473	0.954545	0.5		0	0	0	0.0328701	0	0.345435	0.358354	0.311613	0.350697	0.350265	0.28748	0.14374	0.14374	0.34635	0.28748	0	0.334068	0.293311	0.14374	0.316228
AHEXASEly		1	1	1	0.987656	1	0.764569	0.680027	0.848627	0.598473	0.594647	0.909091	1	1	0.580073	0.909091	1	0.540185	0.879473	1	0.5		0	0	0	0.0328701	0	0.345435	0.358354	0.311613	0.350697	0.350265	0.28748	3.7901e-13	3.7901e-13	0.34635	0.28748	0	0.334068	0.293311	3.7901e-13	0.316228
AICART		0.859308	0.859308	0.807401	0.837698	0.859308	0.656912	0.568547	0.695785	0.486652	0.528127	0.720452	0.826644	0.826644	0.46969	0.781189	0.859308	0.47887	0.751083	0.826644	0.439486		3.82219e-14	3.33067e-16	0.0620838	0.043184	2.23743e-14	0.296846	0.306741	0.273941	0.291562	0.302752	0.236701	0.103294	0.103294	0.286073	0.247034	6.2245e-14	0.291306	0.255707	0.103294	0.275948
AIRCr		0.859308	0.859308	0.807401	0.837698	0.859308	0.656912	0.568547	0.695785	0.486652	0.528127	0.720452	0.826644	0.826644	0.46969	0.781189	0.859308	0.47887	0.751083	0.826644	0.439486		8.40118e-14	1.11022e-16	0.0620838	0.043184	2.8756e-14	0.296846	0.306741	0.273941	0.291562	0.302752	0.236701	0.103294	0.103294	0.286073	0.247034	2.41229e-13	0.291306	0.255707	0.103294	0.275948
AK2LGCHOLt		1	1	1	0.987656	1	0.764569	0.680027	0.848627	0.598473	0.594647	0.909091	0.954545	0.954545	0.580073	0.909091	1	0.540185	0.879473	0.954545	0.5		0	0	0	0.0328701	0	0.345435	0.358354	0.311613	0.350697	0.350265	0.28748	0.14374	0.14374	0.34635	0.28748	0	0.334068	0.293311	0.14374	0.316228
AKGDm		1	1	1	0.987656	1	0.764569	0.680027	0.848627	0.598473	0.594647	0.909091	0.954545	0.954545	0.580073	0.909091	1	0.540185	0.879473	0.954545	0.5		0	0	0	0.0328701	0	0.345435	0.358354	0.311613	0.350697	0.350265	0.28748	0.14374	0.14374	0.34635	0.28748	0	0.334068	0.293311	0.14374	0.316228
AKGMALtm		1	1	1	0.987656	1	0.764569	0.680027	0.848284	0.598473	0.594647	0.909091	0.954545	0.954545	0.580073	0.909091	1	0.540185	0.879473	0.954545	0.5		0	0	0	0.0328701	0	0.345435	0.358354	0.311731	0.350697	0.350265	0.28748	0.14374	0.14374	0.34635	0.28748	0	0.334068	0.293311	0.14374	0.316228
AKGt4_3		1	1	1	0.987656	1	0.764569	0.680027	0.847265	0.598473	0.594647	0.909091	0.954545	0.954545	0.580073	0.909091	1	0.540185	0.879473	0.954545	0.5		0	0	0	0.0328701	0	0.345435	0.358354	0.313401	0.350697	0.350265	0.28748	0.14374	0.14374	0.34635	0.28748	0	0.334068	0.293311	0.14374	0.316228
AKGtp		1	1	1	0.987656	1	0.764569	0.680027	0.848627	0.598473	0.594647	0.909091	1	1	0.580073	0.909091	1	0.540185	0.879473	1	0.5		0	0	0	0.0328701	0	0.345435	0.358354	0.311613	0.350697	0.350265	0.28748	3.7901e-13	3.7901e-13	0.34635	0.28748	0	0.334068	0.293311	3.7901e-13	0.316228
AKR1C41		1	1	1	0.987656	1	0.764569	0.680027	0.848627	0.598473	0.594647	0.909091	1	1	0.580073	0.909091	1	0.540185	0.879473	1	0.5		0	0	0	0.0328701	0	0.345435	0.358354	0.311613	0.350697	0.350265	0.28748	3.7901e-13	3.7901e-13	0.34635	0.28748	0	0.334068	0.293311	3.7901e-13	0.316228
AKR1C42		1	1	1	0.987656	1	0.764569	0.680027	0.848627	0.598473	0.594647	0.909091	1	1	0.580073	0.909091	1	0.540185	0.879473	1	0.5		0	0	0	0.0328701	0	0.345435	0.358354	0.311613	0.350697	0.350265	0.28748	3.7901e-13	3.7901e-13	0.34635	0.28748	0	0.334068	0.293311	3.7901e-13	0.316228
ALAASNNaEx		1	1	1	0.987656	1	0.764569	0.680027	0.848627	0.598473	0.594647	0.909091	1	1	0.580073	0.909091	1	0.540185	0.879473	1	0.5		0	0	0	0.0328701	0	0.345435	0.358354	0.311613	0.350697	0.350265	0.28748	3.7901e-13	3.7901e-13	0.34635	0.28748	0	0.334068	0.293311	3.7901e-13	0.316228
ALACYSNaEx		1	1	1	0.987656	1	0.764569	0.680027	0.848627	0.598473	0.594647	0.909091	1	1	0.580073	0.909091	1	0.540185	0.879473	1	0.5		0	0	0	0.0328701	0	0.345435	0.358354	0.311613	0.350697	0.350265	0.28748	3.7901e-13	3.7901e-13	0.34635	0.28748	0	0.334068	0.293311	3.7901e-13	0.316228
ALADGLNexR		1	1	1	0.987656	1	0.764569	0.680027	0.848627	0.598473	0.594647	0.909091	1	1	0.580073	0.909091	1	0.540185	0.879473	1	0.5		0	0	0	0.0328701	0	0.345435	0.358354	0.311613	0.350697	0.350265	0.28748	3.7901e-13	3.7901e-13	0.34635	0.28748	0	0.334068	0.293311	3.7901e-13	0.316228
ALADGLYexR		1	1	1	0.987656	1	0.764569	0.680027	0.848627	0.598473	0.594647	0.909091	1	1	0.580073	0.909091	1	0.540185	0.879473	1	0.5		0	0	0	0.0328701	0	0.345435	0.358354	0.311613	0.350697	0.350265	0.28748	3.7901e-13	3.7901e-13	0.34635	0.28748	0	0.334068	0.293311	3.7901e-13	0.316228
ALAGLNNaEx		1	1	1	0.987656	1	0.764569	0.680027	0.848627	0.598473	0.594647	0.909091	1	1	0.580073	0.909091	1	0.540185	0.879473	1	0.5		0	0	0	0.0328701	0	0.345435	0.358354	0.311613	0.350697	0.350265	0.28748	3.7901e-13	3.7901e-13	0.34635	0.28748	0	0.334068	0.293311	3.7901e-13	0.316228
ALAGLNexR		1	1	1	0.987656	1	0.764569	0.680027	0.848627	0.598473	0.594647	0.909091	1	1	0.580073	0.909091	1	0.540185	0.879473	1	0.5		0	0	0	0.0328701	0	0.345435	0.358354	0.311613	0.350697	0.350265	0.28748	3.7901e-13	3.7901e-13	0.34635	0.28748	0	0.334068	0.293311	3.7901e-13	0.316228
ALAGLYexR		1	1	1	0.987656	1	0.764569	0.680027	0.848627	0.598473	0.594647	0.909091	1	1	0.580073	0.909091	1	0.540185	0.879473	1	0.5		0	0	0	0.0328701	0	0.345435	0.358354	0.311613	0.350697	0.350265	0.28748	3.7901e-13	3.7901e-13	0.34635	0.28748	0	0.334068	0.293311	3.7901e-13	0.316228
ALAR		1	1	1	0.987656	1	0.764569	0.664845	0.807304	0.570741	0.594647	0.909091	0.954545	0.954545	0.550203	0.909091	1	0.540185	0.874195	0.954545	0.5		0	0	0	0.0328701	0	0.345435	0.357145	0.321724	0.342387	0.350265	0.28748	0.14374	0.14374	0.335157	0.28748	0	0.334068	0.297451	0.14374	0.316228
ALASERNaEx		1	1	1	0.987656	1	0.764569	0.680027	0.848627	0.598473	0.594647	0.909091	1	1	0.580073	0.909091	1	0.540185	0.879473	1	0.5		0	0	0	0.0328701	0	0.345435	0.358354	0.311613	0.350697	0.350265	0.28748	3.7901e-13	3.7901e-13	0.34635	0.28748	0	0.334068	0.293311	3.7901e-13	0.316228
ALASm		1	1	1	0.987656	1	0.764569	0.680027	0.848627	0.598473	0.594647	0.909091	1	1	0.580073	0.909091	1	0.540185	0.879473	1	0.5		0	0	0	0.0328701	0	0.345435	0.358354	0.311613	0.350697	0.350265	0.28748	3.7901e-13	3.7901e-13	0.34635	0.28748	0	0.334068	0.293311	3.7901e-13	0.316228
ALATA_L		1	1	0.941902	0.978055	1	0.764569	0.664845	0.807304	0.570741	0.594647	0.909091	0.954545	0.954545	0.550203	0.909091	1	0.540185	0.874195	0.954545	0.5		0	0	0.0836597	0.0470449	0	0.345435	0.357145	0.321724	0.342387	0.350265	0.28748	0.14374	0.14374	0.335157	0.28748	0	0.334068	0.297451	0.14374	0.316228
ALATHRNaEx		1	1	1	0.987656	1	0.764569	0.680027	0.848627	0.598473	0.594647	0.909091	1	1	0.580073	0.909091	1	0.540185	0.879473	1	0.5		0	0	0	0.0328701	0	0.345435	0.358354	0.311613	0.350697	0.350265	0.28748	3.7901e-13	3.7901e-13	0.34635	0.28748	0	0.334068	0.293311	3.7901e-13	0.316228
ALAt2r		1	1	1	0.987656	1	0.764569	0.680027	0.848627	0.598473	0.594647	0.909091	1	1	0.580073	0.909091	1	0.540185	0.879473	1	0.5		0	0	0	0.0328701	0	0.345435	0.358354	0.311613	0.350697	0.350265	0.28748	3.7901e-13	3.7901e-13	0.34635	0.28748	0	0.334068	0.293311	3.7901e-13	0.316228
ALAt2rL		1	1	1	0.987656	1	0.764569	0.680027	0.848627	0.598473	0.594647	0.909091	1	1	0.580073	0.909091	1	0.540185	0.879473	1	0.5		0	0	0	0.0328701	0	0.345435	0.358354	0.311613	0.350697	0.350265	0.28748	3.7901e-13	3.7901e-13	0.34635	0.28748	0	0.334068	0.293311	3.7901e-13	0.316228
ALAt4		1	1	1	0.987656	1	0.764569	0.680027	0.848627	0.598473	0.594647	0.909091	1	1	0.580073	0.909091	1	0.540185	0.879473	1	0.5		0	0	0	0.0328701	0	0.345435	0.358354	0.311613	0.350697	0.350265	0.28748	3.7901e-13	3.7901e-13	0.34635	0.28748	0	0.334068	0.293311	3.7901e-13	0.316228
ALAtN1		1	1	1	0.987656	1	0.764569	0.680027	0.848627	0.598473	0.594647	0.909091	1	1	0.580073	0.909091	1	0.540185	0.879473	1	0.5		0	0	0	0.0328701	0	0.345435	0.358354	0.311613	0.350697	0.350265	0.28748	3.7901e-13	3.7901e-13	0.34635	0.28748	0	0.334068	0.293311	3.7901e-13	0.316228
ALCD1		1	1	1	0.987656	1	0.764569	0.680027	0.8462	0.598473	0.594647	0.909091	0.954545	0.954545	0.580073	0.909091	1	0.540185	0.879473	0.954545	0.5		0	0	0	0.0328701	0	0.345435	0.358354	0.312493	0.350697	0.350265	0.28748	0.14374	0.14374	0.34635	0.28748	0	0.334068	0.293311	0.14374	0.316228
ALCD21_D		1	1	1	0.987656	1	0.764569	0.680027	0.848627	0.598473	0.594647	0.909091	1	1	0.580073	0.909091	1	0.540185	0.879473	1	0.5		0	0	0	0.0328701	0	0.345435	0.358354	0.311613	0.350697	0.350265	0.28748	3.7901e-13	3.7901e-13	0.34635	0.28748	0	0.334068	0.293311	3.7901e-13	0.316228
ALCD21_L		1	1	1	0.987656	1	0.764569	0.680027	0.848627	0.598473	0.594647	0.909091	1	1	0.580073	0.909091	1	0.540185	0.879473	1	0.5		0	0	0	0.0328701	0	0.345435	0.358354	0.311613	0.350697	0.350265	0.28748	3.7901e-13	3.7901e-13	0.34635	0.28748	0	0.334068	0.293311	3.7901e-13	0.316228
ALCD22_D		1	1	1	0.987656	1	0.764569	0.680027	0.848627	0.598473	0.594647	0.909091	1	1	0.580073	0.909091	1	0.540185	0.879473	1	0.5		0	0	0	0.0328701	0	0.345435	0.358354	0.311613	0.350697	0.350265	0.28748	3.7901e-13	3.7901e-13	0.34635	0.28748	0	0.334068	0.293311	3.7901e-13	0.316228
ALCD22_L		1	1	1	0.987656	1	0.764569	0.680027	0.848627	0.598473	0.594647	0.909091	1	1	0.580073	0.909091	1	0.540185	0.879473	1	0.5		0	0	0	0.0328701	0	0.345435	0.358354	0.311613	0.350697	0.350265	0.28748	3.7901e-13	3.7901e-13	0.34635	0.28748	0	0.334068	0.293311	3.7901e-13	0.316228
ALCD2yf		1	1	1	0.987656	1	0.764569	0.680027	0.848627	0.598473	0.594647	0.909091	1	1	0.580073	0.909091	1	0.540185	0.879473	1	0.5		0	0	0	0.0328701	0	0.345435	0.358354	0.311613	0.350697	0.350265	0.28748	3.7901e-13	3.7901e-13	0.34635	0.28748	0	0.334068	0.293311	3.7901e-13	0.316228
ALDD20x		1	1	1	0.987656	1	0.764569	0.680027	0.848627	0.598473	0.594647	0.909091	1	1	0.580073	0.909091	1	0.540185	0.879473	1	0.5		0	0	0	0.0328701	0	0.345435	0.358354	0.311613	0.350697	0.350265	0.28748	3.7901e-13	3.7901e-13	0.34635	0.28748	0	0.334068	0.293311	3.7901e-13	0.316228
ALDD20xm		1	1	1	0.987656	1	0.764569	0.680027	0.848627	0.598473	0.594647	0.909091	1	1	0.580073	0.909091	1	0.540185	0.879473	1	0.5		0	0	0	0.0328701	0	0.345435	0.358354	0.311613	0.350697	0.350265	0.28748	3.7901e-13	3.7901e-13	0.34635	0.28748	0	0.334068	0.293311	3.7901e-13	0.316228
ALDD21		1	1	1	0.987656	1	0.764569	0.680027	0.848627	0.598473	0.594647	0.909091	1	1	0.580073	0.909091	1	0.540185	0.879473	1	0.5		0	0	0	0.0328701	0	0.345435	0.358354	0.311613	0.350697	0.350265	0.28748	3.7901e-13	3.7901e-13	0.34635	0.28748	0	0.334068	0.293311	3.7901e-13	0.316228
ALDD2x		1	1	1	0.987656	1	0.764569	0.680027	0.848627	0.598473	0.594647	0.909091	1	1	0.580073	0.909091	1	0.540185	0.879473	1	0.5		0	0	0	0.0328701	0	0.345435	0.358354	0.311613	0.350697	0.350265	0.28748	3.7901e-13	3.7901e-13	0.34635	0.28748	0	0.334068	0.293311	3.7901e-13	0.316228
ALDD2xm		1	1	1	0.987656	1	0.764569	0.680027	0.848627	0.598473	0.594647	0.909091	1	1	0.580073	0.909091	1	0.540185	0.879473	1	0.5		0	0	0	0.0328701	0	0.345435	0.358354	0.311613	0.350697	0.350265	0.28748	3.7901e-13	3.7901e-13	0.34635	0.28748	0	0.334068	0.293311	3.7901e-13	0.316228
ALDD2y		1	1	1	0.987656	1	0.764569	0.680027	0.848627	0.598473	0.594647	0.909091	1	1	0.580073	0.909091	1	0.540185	0.879473	1	0.5		0	0	0	0.0328701	0	0.345435	0.358354	0.311613	0.350697	0.350265	0.28748	3.7901e-13	3.7901e-13	0.34635	0.28748	0	0.334068	0.293311	3.7901e-13	0.316228
ALDSTRNte		1	1	1	0.987656	1	0.764569	0.680027	0.848627	0.598473	0.594647	0.909091	1	1	0.580073	0.909091	1	0.540185	0.879473	1	0.5		0	0	0	0.0328701	0	0.345435	0.358354	0.311613	0.350697	0.350265	0.28748	3.7901e-13	3.7901e-13	0.34635	0.28748	0	0.334068	0.293311	3.7901e-13	0.316228
ALKP		1	1	1	0.987656	1	0.764569	0.680027	0.848627	0.598473	0.594647	0.909091	1	1	0.580073	0.909091	1	0.540185	0.879473	1	0.5		0	0	0	0.0328701	0	0.345435	0.358354	0.311613	0.350697	0.350265	0.28748	3.7901e-13	3.7901e-13	0.34635	0.28748	0	0.334068	0.293311	3.7901e-13	0.316228
ALOX12		1	1	1	0.987656	1	0.764569	0.680027	0.848627	0.598473	0.594647	0.909091	1	1	0.580073	0.909091	1	0.540185	0.879473	1	0.5		0	0	0	0.0328701	0	0.345435	0.358354	0.311613	0.350697	0.350265	0.28748	3.7901e-13	3.7901e-13	0.34635	0.28748	0	0.334068	0.293311	3.7901e-13	0.316228
ALOX12R		1	1	1	0.987656	1	0.764569	0.680027	0.848627	0.598473	0.594647	0.909091	1	1	0.580073	0.909091	1	0.540185	0.879473	1	0.5		0	0	0	0.0328701	0	0.345435	0.358354	0.311613	0.350697	0.350265	0.28748	3.7901e-13	3.7901e-13	0.34635	0.28748	0	0.334068	0.293311	3.7901e-13	0.316228
ALOX15		1	1	1	0.987656	1	0.764569	0.680027	0.848627	0.598473	0.594647	0.909091	1	1	0.580073	0.909091	1	0.540185	0.879473	1	0.5		0	0	0	0.0328701	0	0.345435	0.358354	0.311613	0.350697	0.350265	0.28748	3.7901e-13	3.7901e-13	0.34635	0.28748	0	0.334068	0.293311	3.7901e-13	0.316228
ALOX5		1	1	1	0.987656	1	0.764569	0.680027	0.848627	0.598473	0.594647	0.909091	1	1	0.580073	0.909091	1	0.540185	0.879473	1	0.5		0	0	0	0.0328701	0	0.345435	0.358354	0.311613	0.350697	0.350265	0.28748	3.7901e-13	3.7901e-13	0.34635	0.28748	0	0.334068	0.293311	3.7901e-13	0.316228
ALOX52		1	1	1	0.987656	1	0.764569	0.680027	0.848627	0.598473	0.594647	0.909091	1	1	0.580073	0.909091	1	0.540185	0.879473	1	0.5		0	0	0	0.0328701	0	0.345435	0.358354	0.311613	0.350697	0.350265	0.28748	3.7901e-13	3.7901e-13	0.34635	0.28748	0	0.334068	0.293311	3.7901e-13	0.316228
ALR		1	1	1	0.987656	1	0.764569	0.680027	0.848627	0.598473	0.594647	0.909091	0.955035	0.955035	0.580073	0.909091	1	0.540185	0.879473	0.955035	0.5		0	0	0	0.0328701	0	0.345435	0.358354	0.311613	0.350697	0.350265	0.28748	0.142192	0.142192	0.34635	0.28748	0	0.334068	0.293311	0.142192	0.316228
ALR2		1	1	1	0.987656	1	0.764569	0.680027	0.848627	0.598473	0.594647	0.909091	1	1	0.580073	0.909091	1	0.540185	0.879473	1	0.5		0	0	0	0.0328701	0	0.345435	0.358354	0.311613	0.350697	0.350265	0.28748	3.7901e-13	3.7901e-13	0.34635	0.28748	0	0.334068	0.293311	3.7901e-13	0.316228
ALR3		1	1	1	0.987656	1	0.764569	0.680027	0.848627	0.598473	0.594647	0.909091	1	1	0.580073	0.909091	1	0.540185	0.879473	1	0.5		0	0	0	0.0328701	0	0.345435	0.358354	0.311613	0.350697	0.350265	0.28748	3.7901e-13	3.7901e-13	0.34635	0.28748	0	0.334068	0.293311	3.7901e-13	0.316228
AM6SAD		1	1	1	0.987656	1	0.764569	0.680027	0.848627	0.598473	0.594647	0.909091	1	1	0.580073	0.909091	1	0.540185	0.879473	1	0.5		0	0	0	0.0328701	0	0.345435	0.358354	0.311613	0.350697	0.350265	0.28748	3.7901e-13	3.7901e-13	0.34635	0.28748	0	0.334068	0.293311	3.7901e-13	0.316228
AMACR2p		1	1	1	0.987656	1	0.764569	0.680027	0.848627	0.598473	0.594647	0.909091	1	1	0.580073	0.909091	1	0.540185	0.879473	1	0.5		0	0	0	0.0328701	0	0.345435	0.358354	0.311613	0.350697	0.350265	0.28748	3.7901e-13	3.7901e-13	0.34635	0.28748	0	0.334068	0.293311	3.7901e-13	0.316228
AMACR2r		1	1	1	0.987656	1	0.764569	0.680027	0.848627	0.598473	0.594647	0.909091	1	1	0.580073	0.909091	1	0.540185	0.879473	1	0.5		0	0	0	0.0328701	0	0.345435	0.358354	0.311613	0.350697	0.350265	0.28748	3.7901e-13	3.7901e-13	0.34635	0.28748	0	0.334068	0.293311	3.7901e-13	0.316228
AMACRp		1	1	1	0.987656	1	0.764569	0.680027	0.848627	0.598473	0.594647	0.909091	1	1	0.580073	0.909091	1	0.540185	0.879473	1	0.5		0	0	0	0.0328701	0	0.345435	0.358354	0.311613	0.350697	0.350265	0.28748	3.7901e-13	3.7901e-13	0.34635	0.28748	0	0.334068	0.293311	3.7901e-13	0.316228
AMACRr		1	1	1	0.987656	1	0.764569	0.680027	0.848627	0.598473	0.594647	0.909091	1	1	0.580073	0.909091	1	0.540185	0.879473	1	0.5		0	0	0	0.0328701	0	0.345435	0.358354	0.311613	0.350697	0.350265	0.28748	3.7901e-13	3.7901e-13	0.34635	0.28748	0	0.334068	0.293311	3.7901e-13	0.316228
AMANK		1	1	1	0.987656	1	0.764569	0.680027	0.848627	0.598473	0.594647	0.909091	0.955035	0.955035	0.580073	0.909091	1	0.540185	0.879473	0.955035	0.5		0	0	0	0.0328701	0	0.345435	0.358354	0.311613	0.350697	0.350265	0.28748	0.142192	0.142192	0.34635	0.28748	0	0.334068	0.293311	0.142192	0.316228
AMCOXO		1	1	1	0.987656	1	0.764569	0.680027	0.848627	0.598473	0.594647	0.909091	1	1	0.580073	0.909091	1	0.540185	0.879473	1	0.5		0	0	0	0.0328701	0	0.345435	0.358354	0.311613	0.350697	0.350265	0.28748	3.7901e-13	3.7901e-13	0.34635	0.28748	0	0.334068	0.293311	3.7901e-13	0.316228
AMETr		1	1	1	0.987634	1	0.764569	0.680027	0.848627	0.598473	0.594647	0.909091	0.955224	0.955224	0.580073	0.909091	1	0.540185	0.879473	0.955224	0.5		0	0	0	0.0329055	0	0.345435	0.358354	0.311613	0.350697	0.350265	0.28748	0.141595	0.141595	0.34635	0.28748	0	0.334068	0.293311	0.141595	0.316228
AMETt2m		1	1	1	0.987634	1	0.764569	0.680027	0.848627	0.598473	0.594647	0.909091	0.954935	0.954935	0.580073	0.909091	1	0.540185	0.879473	0.954935	0.5		0	0	0	0.0329055	0	0.345435	0.358354	0.311613	0.350697	0.350265	0.28748	0.142508	0.142508	0.34635	0.28748	0	0.334068	0.293311	0.142508	0.316228
AMETtn		1	1	1	0.987656	1	0.764569	0.680027	0.848627	0.598473	0.594647	0.909091	1	1	0.580073	0.909091	1	0.540185	0.879473	1	0.5		0	0	0	0.0328701	0	0.345435	0.358354	0.311613	0.350697	0.350265	0.28748	3.7901e-13	3.7901e-13	0.34635	0.28748	0	0.334068	0.293311	3.7901e-13	0.316228
AMPDA		1	1	1	0.987656	1	0.764569	0.680027	0.848627	0.598473	0.594647	0.909091	0.955611	0.955611	0.580073	0.909091	1	0.540185	0.879473	0.955611	0.5		0	0	0	0.0328701	0	0.345435	0.358354	0.311613	0.350697	0.350265	0.28748	0.140371	0.140371	0.34635	0.28748	0	0.334068	0.293311	0.140371	0.316228
AMPTASECG		1	1	1	0.987656	1	0.764569	0.680027	0.848627	0.598473	0.594647	0.909091	0.954545	0.954545	0.580073	0.909091	1	0.540185	0.879473	0.954545	0.5		0	0	0	0.0328701	0	0.345435	0.358354	0.311613	0.350697	0.350265	0.28748	0.14374	0.14374	0.34635	0.28748	0	0.334068	0.293311	0.14374	0.316228
AMPTASECGe		1	1	1	0.987656	1	0.764569	0.680027	0.848627	0.598473	0.594647	0.909091	0.954545	0.954545	0.580073	0.909091	1	0.540185	0.879473	0.954545	0.5		0	0	0	0.0328701	0	0.345435	0.358354	0.311613	0.350697	0.350265	0.28748	0.14374	0.14374	0.34635	0.28748	0	0.334068	0.293311	0.14374	0.316228
AMPtp		1	1	1	0.987656	1	0.764569	0.680027	0.848627	0.598473	0.594647	0.909091	1	1	0.580073	0.909091	1	0.540185	0.879473	1	0.5		0	0	0	0.0328701	0	0.345435	0.358354	0.311613	0.350697	0.350265	0.28748	3.7901e-13	3.7901e-13	0.34635	0.28748	0	0.334068	0.293311	3.7901e-13	0.316228
AMPtr		1	1	1	0.987656	1	0.764569	0.680027	0.848627	0.598473	0.594647	0.909091	1	1	0.580073	0.909091	1	0.540185	0.879473	1	0.5		0	0	0	0.0328701	0	0.345435	0.358354	0.311613	0.350697	0.350265	0.28748	3.7901e-13	3.7901e-13	0.34635	0.28748	0	0.334068	0.293311	3.7901e-13	0.316228
AMY1e		1	1	1	0.987656	1	0.764569	0.680027	0.848627	0.598473	0.594647	0.909091	1	1	0.580073	0.909091	1	0.540185	0.879473	1	0.5		0	0	0	0.0328701	0	0.345435	0.358354	0.311613	0.350697	0.350265	0.28748	3.7901e-13	3.7901e-13	0.34635	0.28748	0	0.334068	0.293311	3.7901e-13	0.316228
AMY2e		1	1	1	0.987656	1	0.764569	0.680027	0.848627	0.598473	0.594647	0.909091	1	1	0.580073	0.909091	1	0.540185	0.879473	1	0.5		0	0	0	0.0328701	0	0.345435	0.358354	0.311613	0.350697	0.350265	0.28748	3.7901e-13	3.7901e-13	0.34635	0.28748	0	0.334068	0.293311	3.7901e-13	0.316228
ANDRSTRNGLCte		1	1	1	0.987656	1	0.764569	0.680027	0.848627	0.598473	0.594647	0.909091	1	1	0.580073	0.909091	1	0.540185	0.879473	1	0.5		0	0	0	0.0328701	0	0.345435	0.358354	0.311613	0.350697	0.350265	0.28748	3.7901e-13	3.7901e-13	0.34635	0.28748	0	0.334068	0.293311	3.7901e-13	0.316228
ANDRSTRNGLCtr		1	1	1	0.987656	1	0.764569	0.680027	0.848627	0.598473	0.594647	0.909091	1	1	0.580073	0.909091	1	0.540185	0.879473	1	0.5		0	0	0	0.0328701	0	0.345435	0.358354	0.311613	0.350697	0.350265	0.28748	3.7901e-13	3.7901e-13	0.34635	0.28748	0	0.334068	0.293311	3.7901e-13	0.316228
ANDRSTRNte		1	1	1	0.987656	1	0.764569	0.680027	0.848627	0.598473	0.594647	0.909091	1	1	0.580073	0.909091	1	0.540185	0.879473	1	0.5		0	0	0	0.0328701	0	0.345435	0.358354	0.311613	0.350697	0.350265	0.28748	3.7901e-13	3.7901e-13	0.34635	0.28748	0	0.334068	0.293311	3.7901e-13	0.316228
ANDRSTRNtr		1	1	1	0.987656	1	0.764569	0.680027	0.848627	0.598473	0.594647	0.909091	1	1	0.580073	0.909091	1	0.540185	0.879473	1	0.5		0	0	0	0.0328701	0	0.345435	0.358354	0.311613	0.350697	0.350265	0.28748	3.7901e-13	3.7901e-13	0.34635	0.28748	0	0.334068	0.293311	3.7901e-13	0.316228
AP4AH1		1	1	1	0.987656	1	0.764569	0.680027	0.848627	0.598473	0.594647	0.909091	1	1	0.580073	0.909091	1	0.540185	0.879473	1	0.5		0	0	0	0.0328701	0	0.345435	0.358354	0.311613	0.350697	0.350265	0.28748	3.7901e-13	3.7901e-13	0.34635	0.28748	0	0.334068	0.293311	3.7901e-13	0.316228
APAT2rm		1	1	1	0.987656	1	0.764569	0.680027	0.848627	0.598473	0.594647	0.909091	1	1	0.580073	0.909091	1	0.540185	0.879473	1	0.5		0	0	0	0.0328701	0	0.345435	0.358354	0.311613	0.350697	0.350265	0.28748	3.7901e-13	3.7901e-13	0.34635	0.28748	0	0.334068	0.293311	3.7901e-13	0.316228
APRTO2		1	1	1	0.987656	1	0.764569	0.680027	0.848627	0.598473	0.594647	0.909091	1	1	0.580073	0.909091	1	0.540185	0.879473	1	0.5		0	0	0	0.0328701	0	0.345435	0.358354	0.311613	0.350697	0.350265	0.28748	3.7901e-13	3.7901e-13	0.34635	0.28748	0	0.334068	0.293311	3.7901e-13	0.316228
AQCOBALt		1	1	1	0.987656	1	0.764569	0.680027	0.848627	0.598473	0.594647	0.909091	1	1	0.580073	0.909091	1	0.540185	0.879473	1	0.5		0	0	0	0.0328701	0	0.345435	0.358354	0.311613	0.350697	0.350265	0.28748	3.7901e-13	3.7901e-13	0.34635	0.28748	0	0.334068	0.293311	3.7901e-13	0.316228
ARAB-Lt		1	1	1	0.987656	1	0.764569	0.680027	0.848627	0.598473	0.594647	0.909091	1	1	0.580073	0.909091	1	0.540185	0.879473	1	0.5		0	0	0	0.0328701	0	0.345435	0.358354	0.311613	0.350697	0.350265	0.28748	3.7901e-13	3.7901e-13	0.34635	0.28748	0	0.334068	0.293311	3.7901e-13	0.316228
ARABR		1	1	1	0.987656	1	0.764569	0.680027	0.848627	0.598473	0.594647	0.909091	1	1	0.580073	0.909091	1	0.540185	0.879473	1	0.5		0	0	0	0.0328701	0	0.345435	0.358354	0.311613	0.350697	0.350265	0.28748	3.7901e-13	3.7901e-13	0.34635	0.28748	0	0.334068	0.293311	3.7901e-13	0.316228
ARACHCOAtx		1	1	1	0.987656	1	0.764569	0.680027	0.848627	0.598473	0.594647	0.909091	1	1	0.580073	0.909091	1	0.540185	0.879473	1	0.5		0	0	0	0.0328701	0	0.345435	0.358354	0.311613	0.350697	0.350265	0.28748	3.7901e-13	3.7901e-13	0.34635	0.28748	0	0.334068	0.293311	3.7901e-13	0.316228
ARACHCPT1		1	1	1	0.987656	1	0.764569	0.680027	0.848627	0.598473	0.594647	0.909091	1	1	0.580073	0.909091	1	0.540185	0.879473	1	0.5		0	0	0	0.0328701	0	0.345435	0.358354	0.311613	0.350697	0.350265	0.28748	3.7901e-13	3.7901e-13	0.34635	0.28748	0	0.334068	0.293311	3.7901e-13	0.316228
ARACHCPT2		1	1	1	0.987656	1	0.764569	0.680027	0.848627	0.598473	0.594647	0.909091	1	1	0.580073	0.909091	1	0.540185	0.879473	1	0.5		0	0	0	0.0328701	0	0.345435	0.358354	0.311613	0.350697	0.350265	0.28748	3.7901e-13	3.7901e-13	0.34635	0.28748	0	0.334068	0.293311	3.7901e-13	0.316228
ARACHCRNt		1	1	1	0.987656	1	0.764569	0.680027	0.848627	0.598473	0.594647	0.909091	1	1	0.580073	0.909091	1	0.540185	0.879473	1	0.5		0	0	0	0.0328701	0	0.345435	0.358354	0.311613	0.350697	0.350265	0.28748	3.7901e-13	3.7901e-13	0.34635	0.28748	0	0.334068	0.293311	3.7901e-13	0.316228
ARACHDCOAtx		1	1	1	0.987656	1	0.764569	0.680027	0.848627	0.598473	0.594647	0.909091	1	1	0.580073	0.909091	1	0.540185	0.879473	1	0.5		0	0	0	0.0328701	0	0.345435	0.358354	0.311613	0.350697	0.350265	0.28748	3.7901e-13	3.7901e-13	0.34635	0.28748	0	0.334068	0.293311	3.7901e-13	0.316228
ARACHDt2		1	1	1	0.987656	1	0.764569	0.680027	0.848627	0.598473	0.594647	0.909091	1	1	0.580073	0.909091	1	0.540185	0.879473	1	0.5		0	0	0	0.0328701	0	0.345435	0.358354	0.311613	0.350697	0.350265	0.28748	3.7901e-13	3.7901e-13	0.34635	0.28748	0	0.334068	0.293311	3.7901e-13	0.316228
ARACHDtr		1	1	1	0.987656	1	0.764569	0.680027	0.848627	0.598473	0.594647	0.909091	1	1	0.580073	0.909091	1	0.540185	0.879473	1	0.5		0	0	0	0.0328701	0	0.345435	0.358354	0.311613	0.350697	0.350265	0.28748	3.7901e-13	3.7901e-13	0.34635	0.28748	0	0.334068	0.293311	3.7901e-13	0.316228
ARACHt		1	1	1	0.987656	1	0.764569	0.680027	0.848627	0.598473	0.594647	0.909091	1	1	0.580073	0.909091	1	0.540185	0.879473	1	0.5		0	0	0	0.0328701	0	0.345435	0.358354	0.311613	0.350697	0.350265	0.28748	3.7901e-13	3.7901e-13	0.34635	0.28748	0	0.334068	0.293311	3.7901e-13	0.316228
ARGDCm		1	1	1	0.987656	1	0.764569	0.680027	0.848627	0.598473	0.594647	0.909091	1	1	0.580073	0.909091	1	0.540185	0.879473	1	0.5		0	0	0	0.0328701	0	0.345435	0.358354	0.311613	0.350697	0.350265	0.28748	3.7901e-13	3.7901e-13	0.34635	0.28748	0	0.334068	0.293311	3.7901e-13	0.316228
ARGLYSex		1	1	1	0.987656	1	0.764569	0.680027	0.848627	0.598473	0.594647	0.909091	1	1	0.580073	0.909091	1	0.540185	0.879473	1	0.5		0	0	0	0.0328701	0	0.345435	0.358354	0.311613	0.350697	0.350265	0.28748	3.7901e-13	3.7901e-13	0.34635	0.28748	0	0.334068	0.293311	3.7901e-13	0.316228
ARGN		1	1	1	0.987656	1	0.764569	0.680027	0.817307	0.594639	0.594647	0.909091	0.954545	0.954545	0.575182	0.909091	1	0.540185	0.877513	0.954545	0.5		0	0	0	0.0328701	0	0.345435	0.358354	0.320449	0.350252	0.350265	0.28748	0.14374	0.14374	0.344826	0.28748	0	0.334068	0.294745	0.14374	0.316228
ARGNm		1	1	1	0.987656	1	0.764569	0.680027	0.817307	0.594639	0.594647	0.909091	0.954545	0.954545	0.575182	0.909091	1	0.540185	0.877513	0.954545	0.5		0	0	0	0.0328701	0	0.345435	0.358354	0.320449	0.350252	0.350265	0.28748	0.14374	0.14374	0.344826	0.28748	0	0.334068	0.294745	0.14374	0.316228
ARGSL		1	1	1	0.987656	1	0.764569	0.680027	0.837952	0.598473	0.594647	0.909091	0.955593	0.955593	0.580073	0.909091	1	0.540185	0.879473	0.955593	0.5		0	0	0	0.0328701	0	0.345435	0.358354	0.316209	0.350697	0.350265	0.28748	0.140426	0.140426	0.34635	0.28748	0	0.334068	0.293311	0.140426	0.316228
ARGSS		1	1	1	0.987656	1	0.764569	0.680027	0.837952	0.598473	0.594647	0.909091	0.955593	0.955593	0.580073	0.909091	1	0.540185	0.879473	0.955593	0.5		0	0	0	0.0328701	0	0.345435	0.358354	0.316209	0.350697	0.350265	0.28748	0.140426	0.140426	0.34635	0.28748	0	0.334068	0.293311	0.140426	0.316228
ARGt4		1	1	1	0.987656	1	0.764569	0.680027	0.848627	0.598473	0.594647	0.909091	1	1	0.580073	0.909091	1	0.540185	0.879473	1	0.5		0	0	0	0.0328701	0	0.345435	0.358354	0.311613	0.350697	0.350265	0.28748	3.7901e-13	3.7901e-13	0.34635	0.28748	0	0.334068	0.293311	3.7901e-13	0.316228
ARGtiDF		1	1	1	0.987656	1	0.764569	0.680027	0.848627	0.598473	0.594647	0.909091	1	1	0.580073	0.909091	1	0.540185	0.879473	1	0.5		0	0	0	0.0328701	0	0.345435	0.358354	0.311613	0.350697	0.350265	0.28748	3.7901e-13	3.7901e-13	0.34635	0.28748	0	0.334068	0.293311	3.7901e-13	0.316228
ARGtm		1	1	1	0.987656	1	0.764569	0.680027	0.817307	0.594639	0.594647	0.909091	0.954545	0.954545	0.575182	0.909091	1	0.540185	0.877513	0.954545	0.5		0	0	0	0.0328701	0	0.345435	0.358354	0.320449	0.350252	0.350265	0.28748	0.14374	0.14374	0.344826	0.28748	0	0.334068	0.294745	0.14374	0.316228
ARSA		1	1	1	0.987656	1	0.764569	0.680027	0.848627	0.598473	0.594647	0.909091	1	1	0.580073	0.909091	1	0.540185	0.879473	1	0.5		0	0	0	0.0328701	0	0.345435	0.358354	0.311613	0.350697	0.350265	0.28748	3.7901e-13	3.7901e-13	0.34635	0.28748	0	0.334068	0.293311	3.7901e-13	0.316228
ARTCOAL1		1	1	1	0.987656	1	0.764569	0.680027	0.848627	0.598473	0.594647	0.909091	0.954545	0.958338	0.580073	0.909091	1	0.540185	0.879473	0.979304	0.5		0	0	0	0.0328701	0	0.345435	0.358354	0.311613	0.350697	0.350265	0.28748	0.14374	0.131747	0.34635	0.28748	0	0.334068	0.293311	0.0654457	0.316228
ARTCOAL2		1	1	1	0.987656	1	0.764569	0.680027	0.848627	0.598473	0.594647	0.909091	0.954545	0.958338	0.580073	0.909091	1	0.540185	0.879473	0.979304	0.5		0	0	0	0.0328701	0	0.345435	0.358354	0.311613	0.350697	0.350265	0.28748	0.14374	0.131747	0.34635	0.28748	0	0.334068	0.293311	0.0654457	0.316228
ARTCOAL3		1	1	1	0.987656	1	0.764569	0.680027	0.848627	0.598473	0.594647	0.909091	0.954545	0.958338	0.580073	0.909091	1	0.540185	0.879473	0.979304	0.5		0	0	0	0.0328701	0	0.345435	0.358354	0.311613	0.350697	0.350265	0.28748	0.14374	0.131747	0.34635	0.28748	0	0.334068	0.293311	0.0654457	0.316228
ARTFR11		1	1	1	0.987656	1	0.764569	0.680027	0.848627	0.598473	0.594647	0.909091	1	1	0.580073	0.909091	1	0.540185	0.879473	1	0.5		0	0	0	0.0328701	0	0.345435	0.358354	0.311613	0.350697	0.350265	0.28748	3.7901e-13	3.7901e-13	0.34635	0.28748	0	0.334068	0.293311	3.7901e-13	0.316228
ARTFR12		1	1	1	0.987656	1	0.764569	0.680027	0.835745	0.598473	0.594647	0.909091	0.954545	0.954545	0.580073	0.909091	1	0.540185	0.879473	0.954545	0.5		0	0	0	0.0328701	0	0.345435	0.358354	0.317345	0.350697	0.350265	0.28748	0.14374	0.14374	0.34635	0.28748	0	0.334068	0.293311	0.14374	0.316228
ARTFR13		1	1	1	0.987656	1	0.764569	0.680027	0.848627	0.598473	0.594647	0.909091	0.956981	0.955656	0.580073	0.909091	1	0.540185	0.879473	0.956355	0.5		0	0	0	0.0328701	0	0.345435	0.358354	0.311613	0.350697	0.350265	0.28748	0.136037	0.140229	0.34635	0.28748	0	0.334068	0.293311	0.138018	0.316228
ARTFR202		1	1	1	0.987656	1	0.764569	0.680027	0.848627	0.598473	0.594647	0.909091	1	1	0.580073	0.909091	1	0.540185	0.879473	1	0.5		0	0	0	0.0328701	0	0.345435	0.358354	0.311613	0.350697	0.350265	0.28748	3.7901e-13	3.7901e-13	0.34635	0.28748	0	0.334068	0.293311	3.7901e-13	0.316228
ARTFR203		1	1	1	0.987656	1	0.764569	0.680027	0.848627	0.598473	0.594647	0.909091	1	1	0.580073	0.909091	1	0.540185	0.879473	1	0.5		0	0	0	0.0328701	0	0.345435	0.358354	0.311613	0.350697	0.350265	0.28748	3.7901e-13	3.7901e-13	0.34635	0.28748	0	0.334068	0.293311	3.7901e-13	0.316228
ARTFR204		1	1	1	0.987656	1	0.764569	0.680027	0.848627	0.598473	0.594647	0.909091	1	1	0.580073	0.909091	1	0.540185	0.879473	1	0.5		0	0	0	0.0328701	0	0.345435	0.358354	0.311613	0.350697	0.350265	0.28748	3.7901e-13	3.7901e-13	0.34635	0.28748	0	0.334068	0.293311	3.7901e-13	0.316228
ARTFR205		1	1	1	0.987656	1	0.764569	0.680027	0.848627	0.598473	0.594647	0.909091	1	1	0.580073	0.909091	1	0.540185	0.879473	1	0.5		0	0	0	0.0328701	0	0.345435	0.358354	0.311613	0.350697	0.350265	0.28748	3.7901e-13	3.7901e-13	0.34635	0.28748	0	0.334068	0.293311	3.7901e-13	0.316228
ARTFR206		1	1	1	0.987656	1	0.764569	0.680027	0.848627	0.598473	0.594647	0.909091	1	1	0.580073	0.909091	1	0.540185	0.879473	1	0.5		0	0	0	0.0328701	0	0.345435	0.358354	0.311613	0.350697	0.350265	0.28748	3.7901e-13	3.7901e-13	0.34635	0.28748	0	0.334068	0.293311	3.7901e-13	0.316228
ARTFR207		1	1	1	0.987656	1	0.764569	0.680027	0.848627	0.598473	0.594647	0.909091	1	1	0.580073	0.909091	1	0.540185	0.879473	1	0.5		0	0	0	0.0328701	0	0.345435	0.358354	0.311613	0.350697	0.350265	0.28748	3.7901e-13	3.7901e-13	0.34635	0.28748	0	0.334068	0.293311	3.7901e-13	0.316228
ARTFR208		1	1	1	0.987656	1	0.764569	0.680027	0.848627	0.598473	0.594647	0.909091	1	1	0.580073	0.909091	1	0.540185	0.879473	1	0.5		0	0	0	0.0328701	0	0.345435	0.358354	0.311613	0.350697	0.350265	0.28748	3.7901e-13	3.7901e-13	0.34635	0.28748	0	0.334068	0.293311	3.7901e-13	0.316228
ARTFR209		1	1	1	0.987656	1	0.764569	0.680027	0.848627	0.598473	0.594647	0.909091	1	1	0.580073	0.909091	1	0.540185	0.879473	1	0.5		0	0	0	0.0328701	0	0.345435	0.358354	0.311613	0.350697	0.350265	0.28748	3.7901e-13	3.7901e-13	0.34635	0.28748	0	0.334068	0.293311	3.7901e-13	0.316228
ARTFR210		1	1	1	0.987656	1	0.764569	0.680027	0.848627	0.598473	0.594647	0.909091	1	1	0.580073	0.909091	1	0.540185	0.879473	1	0.5		0	0	0	0.0328701	0	0.345435	0.358354	0.311613	0.350697	0.350265	0.28748	3.7901e-13	3.7901e-13	0.34635	0.28748	0	0.334068	0.293311	3.7901e-13	0.316228
ARTFR211		1	1	1	0.987656	1	0.764569	0.680027	0.848627	0.598473	0.594647	0.909091	1	1	0.580073	0.909091	1	0.540185	0.879473	1	0.5		0	0	0	0.0328701	0	0.345435	0.358354	0.311613	0.350697	0.350265	0.28748	3.7901e-13	3.7901e-13	0.34635	0.28748	0	0.334068	0.293311	3.7901e-13	0.316228
ARTFR212		1	1	1	0.987656	1	0.764569	0.680027	0.848627	0.598473	0.594647	0.909091	1	1	0.580073	0.909091	1	0.540185	0.879473	1	0.5		0	0	0	0.0328701	0	0.345435	0.358354	0.311613	0.350697	0.350265	0.28748	3.7901e-13	3.7901e-13	0.34635	0.28748	0	0.334068	0.293311	3.7901e-13	0.316228
ARTFR213		1	1	1	0.987656	1	0.764569	0.680027	0.848627	0.598473	0.594647	0.909091	1	1	0.580073	0.909091	1	0.540185	0.879473	1	0.5		0	0	0	0.0328701	0	0.345435	0.358354	0.311613	0.350697	0.350265	0.28748	3.7901e-13	3.7901e-13	0.34635	0.28748	0	0.334068	0.293311	3.7901e-13	0.316228
ARTFR31		1	1	1	0.987656	1	0.764569	0.680027	0.848627	0.598473	0.594647	0.909091	0.957317	0.955656	0.580073	0.909091	1	0.540185	0.879473	0.956916	0.5		0	0	0	0.0328701	0	0.345435	0.358354	0.311613	0.350697	0.350265	0.28748	0.134974	0.140229	0.34635	0.28748	0	0.334068	0.293311	0.136242	0.316228
ARTFR32		1	1	1	0.987656	1	0.764569	0.680027	0.848627	0.598473	0.594647	0.909091	0.955836	0.955074	0.580073	0.909091	1	0.540185	0.879473	0.955842	0.5		0	0	0	0.0328701	0	0.345435	0.358354	0.311613	0.350697	0.350265	0.28748	0.139659	0.142069	0.34635	0.28748	0	0.334068	0.293311	0.139638	0.316228
ARTFR33		1	1	1	0.987656	1	0.764569	0.680027	0.848627	0.598473	0.594647	0.909091	0.956005	0.955074	0.580073	0.909091	1	0.540185	0.879473	0.955984	0.5		0	0	0	0.0328701	0	0.345435	0.358354	0.311613	0.350697	0.350265	0.28748	0.139124	0.142069	0.34635	0.28748	0	0.334068	0.293311	0.13919	0.316228
ARTFR34		1	1	1	0.987656	1	0.764569	0.680027	0.848627	0.598473	0.594647	0.909091	0.955155	0.954941	0.580073	0.909091	1	0.540185	0.879473	0.955741	0.5		0	0	0	0.0328701	0	0.345435	0.358354	0.311613	0.350697	0.350265	0.28748	0.141811	0.14249	0.34635	0.28748	0	0.334068	0.293311	0.139959	0.316228
ARTFR41		1	1	1	0.987656	1	0.764569	0.680027	0.835745	0.598473	0.594647	0.909091	0.954545	0.954545	0.580073	0.909091	1	0.540185	0.879473	0.954545	0.5		0	0	0	0.0328701	0	0.345435	0.358354	0.317345	0.350697	0.350265	0.28748	0.14374	0.14374	0.34635	0.28748	0	0.334068	0.293311	0.14374	0.316228
ARTFR42		1	1	1	0.987656	1	0.764569	0.680027	0.848627	0.598473	0.594647	0.909091	0.955836	0.955074	0.580073	0.909091	1	0.540185	0.879473	0.955842	0.5		0	0	0	0.0328701	0	0.345435	0.358354	0.311613	0.350697	0.350265	0.28748	0.139659	0.142069	0.34635	0.28748	0	0.334068	0.293311	0.139638	0.316228
ARTFR43		1	1	1	0.987656	1	0.764569	0.680027	0.848627	0.598473	0.594647	0.909091	0.956005	0.955074	0.580073	0.909091	1	0.540185	0.879473	0.955984	0.5		0	0	0	0.0328701	0	0.345435	0.358354	0.311613	0.350697	0.350265	0.28748	0.139124	0.142069	0.34635	0.28748	0	0.334068	0.293311	0.13919	0.316228
ARTFR44		1	1	1	0.987656	1	0.764569	0.680027	0.848627	0.598473	0.594647	0.909091	0.955155	0.954941	0.580073	0.909091	1	0.540185	0.879473	0.955741	0.5		0	0	0	0.0328701	0	0.345435	0.358354	0.311613	0.350697	0.350265	0.28748	0.141811	0.14249	0.34635	0.28748	0	0.334068	0.293311	0.139959	0.316228
ARTFR45		1	1	1	0.987656	1	0.764569	0.680027	0.848627	0.598473	0.594647	0.909091	1	1	0.580073	0.909091	1	0.540185	0.879473	1	0.5		0	0	0	0.0328701	0	0.345435	0.358354	0.311613	0.350697	0.350265	0.28748	3.7901e-13	3.7901e-13	0.34635	0.28748	0	0.334068	0.293311	3.7901e-13	0.316228
ARTFR46		1	1	1	0.987656	1	0.764569	0.680027	0.848627	0.598473	0.594647	0.909091	0.956005	0.955074	0.580073	0.909091	1	0.540185	0.879473	0.955984	0.5		0	0	0	0.0328701	0	0.345435	0.358354	0.311613	0.350697	0.350265	0.28748	0.139124	0.142069	0.34635	0.28748	0	0.334068	0.293311	0.13919	0.316228
ARTFR61		1	1	1	0.987656	1	0.764569	0.680027	0.835745	0.598473	0.594647	0.909091	0.954545	0.954545	0.580073	0.909091	1	0.540185	0.879473	0.954545	0.5		0	0	0	0.0328701	0	0.345435	0.358354	0.317345	0.350697	0.350265	0.28748	0.14374	0.14374	0.34635	0.28748	0	0.334068	0.293311	0.14374	0.316228
ARTPLM1		1	1	1	0.987656	1	0.764569	0.680027	0.848627	0.598473	0.594647	0.909091	0.957317	0.957317	0.580073	0.909091	1	0.540185	0.879473	0.958074	0.5		0	0	0	0.0328701	0	0.345435	0.358354	0.311613	0.350697	0.350265	0.28748	0.134974	0.134974	0.34635	0.28748	0	0.334068	0.293311	0.132583	0.316228
ARTPLM1m		1	1	1	0.987656	1	0.764569	0.680027	0.830634	0.598473	0.594647	0.909091	0.954545	0.954545	0.580073	0.909091	1	0.540185	0.879473	0.954545	0.5		0	0	0	0.0328701	0	0.345435	0.358354	0.320326	0.350697	0.350265	0.28748	0.14374	0.14374	0.34635	0.28748	0	0.334068	0.293311	0.14374	0.316228
ARTPLM2		1	1	1	0.987656	1	0.764569	0.680027	0.848627	0.598473	0.594647	0.909091	0.956981	0.955768	0.580073	0.909091	1	0.540185	0.879473	0.960028	0.5		0	0	0	0.0328701	0	0.345435	0.358354	0.311613	0.350697	0.350265	0.28748	0.136037	0.139872	0.34635	0.28748	0	0.334068	0.293311	0.126402	0.316228
ARTPLM2m		1	1	1	0.987656	1	0.764569	0.680027	0.830634	0.598473	0.594647	0.909091	0.954545	0.954545	0.580073	0.909091	1	0.540185	0.879473	0.954545	0.5		0	0	0	0.0328701	0	0.345435	0.358354	0.320326	0.350697	0.350265	0.28748	0.14374	0.14374	0.34635	0.28748	0	0.334068	0.293311	0.14374	0.316228
ARTPLM3		1	1	1	0.987656	1	0.764569	0.680027	0.848627	0.598473	0.594647	0.909091	0.956981	0.955768	0.580073	0.909091	1	0.540185	0.879473	0.960028	0.5		0	0	0	0.0328701	0	0.345435	0.358354	0.311613	0.350697	0.350265	0.28748	0.136037	0.139872	0.34635	0.28748	0	0.334068	0.293311	0.126402	0.316228
ARTPLM3m		1	1	1	0.987656	1	0.764569	0.680027	0.830634	0.598473	0.594647	0.909091	0.954545	0.954545	0.580073	0.909091	1	0.540185	0.879473	0.954545	0.5		0	0	0	0.0328701	0	0.345435	0.358354	0.320326	0.350697	0.350265	0.28748	0.14374	0.14374	0.34635	0.28748	0	0.334068	0.293311	0.14374	0.316228
ASAH1		1	1	1	0.987656	1	0.764569	0.680027	0.848627	0.598473	0.594647	0.909091	0.954831	0.954822	0.580073	0.909091	1	0.540185	0.879473	0.954822	0.5		0	0	0	0.0328701	0	0.345435	0.358354	0.311613	0.350697	0.350265	0.28748	0.142837	0.142866	0.34635	0.28748	0	0.334068	0.293311	0.142866	0.316228
ASCBOX		1	1	1	0.987656	1	0.764569	0.680027	0.848627	0.598473	0.594647	0.909091	0.954545	0.954545	0.580073	0.909091	1	0.540185	0.879473	0.954545	0.5		0	0	0	0.0328701	0	0.345435	0.358354	0.311613	0.350697	0.350265	0.28748	0.14374	0.14374	0.34635	0.28748	0	0.334068	0.293311	0.14374	0.316228
ASCBt		1	1	1	0.987656	1	0.764569	0.680027	0.848627	0.598473	0.594647	0.909091	1	1	0.580073	0.909091	1	0.540185	0.879473	1	0.5		0	0	0	0.0328701	0	0.345435	0.358354	0.311613	0.350697	0.350265	0.28748	3.7901e-13	3.7901e-13	0.34635	0.28748	0	0.334068	0.293311	3.7901e-13	0.316228
ASCBt4		1	1	1	0.987656	1	0.764569	0.680027	0.848627	0.598473	0.594647	0.909091	1	1	0.580073	0.909091	1	0.540185	0.879473	1	0.5		0	0	0	0.0328701	0	0.345435	0.358354	0.311613	0.350697	0.350265	0.28748	3.7901e-13	3.7901e-13	0.34635	0.28748	0	0.334068	0.293311	3.7901e-13	0.316228
ASNALANaEx		1	1	1	0.987656	1	0.764569	0.680027	0.848627	0.598473	0.594647	0.909091	1	1	0.580073	0.909091	1	0.540185	0.879473	1	0.5		0	0	0	0.0328701	0	0.345435	0.358354	0.311613	0.350697	0.350265	0.28748	3.7901e-13	3.7901e-13	0.34635	0.28748	0	0.334068	0.293311	3.7901e-13	0.316228
ASNCYSNaEx		1	1	1	0.987656	1	0.764569	0.680027	0.848627	0.598473	0.594647	0.909091	1	1	0.580073	0.909091	1	0.540185	0.879473	1	0.5		0	0	0	0.0328701	0	0.345435	0.358354	0.311613	0.350697	0.350265	0.28748	3.7901e-13	3.7901e-13	0.34635	0.28748	0	0.334068	0.293311	3.7901e-13	0.316228
ASNGLNNaEx		1	1	1	0.987656	1	0.764569	0.680027	0.848627	0.598473	0.594647	0.909091	1	1	0.580073	0.909091	1	0.540185	0.879473	1	0.5		0	0	0	0.0328701	0	0.345435	0.358354	0.311613	0.350697	0.350265	0.28748	3.7901e-13	3.7901e-13	0.34635	0.28748	0	0.334068	0.293311	3.7901e-13	0.316228
ASNNm		1	1	1	0.987656	1	0.764569	0.680027	0.848627	0.598473	0.594647	0.909091	0.955595	0.955595	0.580073	0.909091	1	0.540185	0.879473	0.955595	0.5		0	0	0	0.0328701	0	0.345435	0.358354	0.311613	0.350697	0.350265	0.28748	0.140422	0.140422	0.34635	0.28748	0	0.334068	0.293311	0.140422	0.316228
ASNS1		1	1	0.94418	0.982342	1	0.764569	0.670182	0.811122	0.577734	0.594647	0.841907	0.954545	0.954545	0.558215	0.909091	1	0.540185	0.875142	0.954545	0.5		0	0	0.0773628	0.0421121	0	0.345435	0.357477	0.321836	0.344745	0.350265	0.278649	0.14374	0.14374	0.338966	0.28748	0	0.334068	0.296644	0.14374	0.316228
ASNSERNaEx		1	1	1	0.987656	1	0.764569	0.680027	0.848627	0.598473	0.594647	0.909091	1	1	0.580073	0.909091	1	0.540185	0.879473	1	0.5		0	0	0	0.0328701	0	0.345435	0.358354	0.311613	0.350697	0.350265	0.28748	3.7901e-13	3.7901e-13	0.34635	0.28748	0	0.334068	0.293311	3.7901e-13	0.316228
ASNTHRNaEx		1	1	1	0.987656	1	0.764569	0.680027	0.848627	0.598473	0.594647	0.909091	1	1	0.580073	0.909091	1	0.540185	0.879473	1	0.5		0	0	0	0.0328701	0	0.345435	0.358354	0.311613	0.350697	0.350265	0.28748	3.7901e-13	3.7901e-13	0.34635	0.28748	0	0.334068	0.293311	3.7901e-13	0.316228
ASNt4		1	1	1	0.987656	1	0.764569	0.680027	0.848627	0.598473	0.594647	0.909091	1	1	0.580073	0.909091	1	0.540185	0.879473	1	0.5		0	0	0	0.0328701	0	0.345435	0.358354	0.311613	0.350697	0.350265	0.28748	3.7901e-13	3.7901e-13	0.34635	0.28748	0	0.334068	0.293311	3.7901e-13	0.316228
ASNtN1		1	1	1	0.987656	1	0.764569	0.680027	0.848627	0.598473	0.594647	0.909091	1	1	0.580073	0.909091	1	0.540185	0.879473	1	0.5		0	0	0	0.0328701	0	0.345435	0.358354	0.311613	0.350697	0.350265	0.28748	3.7901e-13	3.7901e-13	0.34635	0.28748	0	0.334068	0.293311	3.7901e-13	0.316228
ASNtm		1	1	1	0.987656	1	0.764569	0.680027	0.848627	0.598473	0.594647	0.909091	0.955595	0.955595	0.580073	0.909091	1	0.540185	0.879473	0.955595	0.5		0	0	0	0.0328701	0	0.345435	0.358354	0.311613	0.350697	0.350265	0.28748	0.140422	0.140422	0.34635	0.28748	0	0.334068	0.293311	0.140422	0.316228
ASPCTr		0.848214	0.848214	0.797909	0.827081	0.848214	0.648432	0.561491	0.687403	0.480866	0.521	0.712242	0.816558	0.816558	0.464144	0.771104	0.848214	0.472423	0.74147	0.816558	0.433636		2.08404e-15	2.22045e-16	0.0601669	0.042333	1.79382e-14	0.293014	0.302794	0.270207	0.287965	0.298804	0.233668	0.100105	0.100105	0.282578	0.243844	1.67707e-15	0.287465	0.252333	0.100105	0.272308
ASPDt6		1	1	1	0.987656	1	0.764569	0.680027	0.848627	0.598473	0.594647	0.909091	1	1	0.580073	0.909091	1	0.540185	0.879473	1	0.5		0	0	0	0.0328701	0	0.345435	0.358354	0.311613	0.350697	0.350265	0.28748	3.7901e-13	3.7901e-13	0.34635	0.28748	0	0.334068	0.293311	3.7901e-13	0.316228
ASPDxt		1	1	1	0.987656	1	0.764569	0.680027	0.848627	0.598473	0.594647	0.909091	1	1	0.580073	0.909091	1	0.540185	0.879473	1	0.5		0	0	0	0.0328701	0	0.345435	0.358354	0.311613	0.350697	0.350265	0.28748	3.7901e-13	3.7901e-13	0.34635	0.28748	0	0.334068	0.293311	3.7901e-13	0.316228
ASPGLUm		1	1	1	0.987656	1	0.764569	0.680027	0.848627	0.598473	0.594647	0.909091	0.954545	0.954545	0.580073	0.909091	1	0.540185	0.879473	0.954545	0.5		0	0	0	0.0328701	0	0.345435	0.358354	0.311613	0.350697	0.350265	0.28748	0.14374	0.14374	0.34635	0.28748	0	0.334068	0.293311	0.14374	0.316228
ASPTA		1	1	1	0.987656	1	0.764569	0.680027	0.848627	0.598473	0.594647	0.909091	0.954545	0.954545	0.580073	0.909091	1	0.540185	0.879473	0.954545	0.5		0	0	0	0.0328701	0	0.345435	0.358354	0.311613	0.350697	0.350265	0.28748	0.14374	0.14374	0.34635	0.28748	0	0.334068	0.293311	0.14374	0.316228
ASPTAm		1	1	1	0.987656	1	0.764569	0.680027	0.848627	0.598473	0.594647	0.909091	0.954545	0.954545	0.580073	0.909091	1	0.540185	0.879473	0.954545	0.5		0	0	0	0.0328701	0	0.345435	0.358354	0.311613	0.350697	0.350265	0.28748	0.14374	0.14374	0.34635	0.28748	0	0.334068	0.293311	0.14374	0.316228
ASPt6		1	1	1	0.987656	1	0.764569	0.680027	0.848627	0.598473	0.594647	0.909091	1	1	0.580073	0.909091	1	0.540185	0.879473	1	0.5		0	0	0	0.0328701	0	0.345435	0.358354	0.311613	0.350697	0.350265	0.28748	3.7901e-13	3.7901e-13	0.34635	0.28748	0	0.334068	0.293311	3.7901e-13	0.316228
ATP1ter		1	1	1	0.987656	1	0.764569	0.680027	0.848627	0.598473	0.594647	0.909091	1	1	0.580073	0.909091	1	0.540185	0.879473	1	0.5		0	0	0	0.0328701	0	0.345435	0.358354	0.311613	0.350697	0.350265	0.28748	3.7901e-13	3.7901e-13	0.34635	0.28748	0	0.334068	0.293311	3.7901e-13	0.316228
ATP2ter		1	1	1	0.987656	1	0.764569	0.680027	0.848627	0.598473	0.594647	0.909091	1	1	0.580073	0.909091	1	0.540185	0.879473	1	0.5		0	0	0	0.0328701	0	0.345435	0.358354	0.311613	0.350697	0.350265	0.28748	3.7901e-13	3.7901e-13	0.34635	0.28748	0	0.334068	0.293311	3.7901e-13	0.316228
ATPH1e		1	1	1	0.987656	1	0.764569	0.680027	0.848627	0.598473	0.594647	0.909091	1	1	0.580073	0.909091	1	0.540185	0.879473	1	0.5		0	0	0	0.0328701	0	0.345435	0.358354	0.311613	0.350697	0.350265	0.28748	3.7901e-13	3.7901e-13	0.34635	0.28748	0	0.334068	0.293311	3.7901e-13	0.316228
ATPH2e		1	1	1	0.987656	1	0.764569	0.680027	0.848627	0.598473	0.594647	0.909091	1	1	0.580073	0.909091	1	0.540185	0.879473	1	0.5		0	0	0	0.0328701	0	0.345435	0.358354	0.311613	0.350697	0.350265	0.28748	3.7901e-13	3.7901e-13	0.34635	0.28748	0	0.334068	0.293311	3.7901e-13	0.316228
ATPS4m		1	1	1	0.987656	1	0.764569	0.680027	0.848627	0.598473	0.594647	0.909091	0.954545	0.954545	0.580073	0.909091	1	0.540185	0.879473	0.954545	0.5		0	0	0	0.0328701	0	0.345435	0.358354	0.311613	0.350697	0.350265	0.28748	0.14374	0.14374	0.34635	0.28748	0	0.334068	0.293311	0.14374	0.316228
ATPasel		1	1	1	0.987656	1	0.764569	0.680027	0.848627	0.598473	0.594647	0.909091	0.954545	0.954545	0.580073	0.909091	1	0.540185	0.879473	0.954545	0.5		0	0	0	0.0328701	0	0.345435	0.358354	0.311613	0.350697	0.350265	0.28748	0.14374	0.14374	0.34635	0.28748	0	0.334068	0.293311	0.14374	0.316228
ATPtm		1	1	1	0.987656	1	0.764569	0.680027	0.848627	0.598473	0.594647	0.909091	1	1	0.580073	0.909091	1	0.540185	0.879473	1	0.5		0	0	0	0.0328701	0	0.345435	0.358354	0.311613	0.350697	0.350265	0.28748	3.7901e-13	3.7901e-13	0.34635	0.28748	0	0.334068	0.293311	3.7901e-13	0.316228
ATPtn		1	1	1	0.987656	1	0.764569	0.680027	0.848627	0.598473	0.594647	0.909091	0.954545	0.954545	0.580073	0.909091	1	0.540185	0.879473	0.954545	0.5		0	0	0	0.0328701	0	0.345435	0.358354	0.311613	0.350697	0.350265	0.28748	0.14374	0.14374	0.34635	0.28748	0	0.334068	0.293311	0.14374	0.316228
ATPtx		1	1	1	0.987656	1	0.764569	0.680027	0.848627	0.598473	0.594647	0.909091	0.956574	0.956474	0.580073	0.909091	1	0.540185	0.879473	0.956569	0.5		0	0	0	0.0328701	0	0.345435	0.358354	0.311613	0.350697	0.350265	0.28748	0.137325	0.13764	0.34635	0.28748	0	0.334068	0.293311	0.13734	0.316228
AVITE1t		1	1	1	0.987656	1	0.764569	0.680027	0.848627	0.598473	0.594647	0.909091	1	1	0.580073	0.909091	1	0.540185	0.879473	1	0.5		0	0	0	0.0328701	0	0.345435	0.358354	0.311613	0.350697	0.350265	0.28748	3.7901e-13	3.7901e-13	0.34635	0.28748	0	0.334068	0.293311	3.7901e-13	0.316228
AVITE2t		1	1	1	0.987656	1	0.764569	0.680027	0.848627	0.598473	0.594647	0.909091	1	1	0.580073	0.909091	1	0.540185	0.879473	1	0.5		0	0	0	0.0328701	0	0.345435	0.358354	0.311613	0.350697	0.350265	0.28748	3.7901e-13	3.7901e-13	0.34635	0.28748	0	0.334068	0.293311	3.7901e-13	0.316228
A_MANASE		1	1	1	0.987656	1	0.764569	0.680027	0.848627	0.598473	0.594647	0.909091	1	1	0.580073	0.909091	1	0.540185	0.879473	1	0.5		0	0	0	0.0328701	0	0.345435	0.358354	0.311613	0.350697	0.350265	0.28748	3.7901e-13	3.7901e-13	0.34635	0.28748	0	0.334068	0.293311	3.7901e-13	0.316228
A_MANASEly		1	1	1	0.987656	1	0.764569	0.680027	0.848627	0.598473	0.594647	0.909091	0.954545	0.954545	0.580073	0.909091	1	0.540185	0.879473	0.954545	0.5		0	0	0	0.0328701	0	0.345435	0.358354	0.311613	0.350697	0.350265	0.28748	0.14374	0.14374	0.34635	0.28748	0	0.334068	0.293311	0.14374	0.316228
Asn-X-Ser/Thrtr		1	1	1	0.987656	1	0.764569	0.680027	0.848627	0.598473	0.594647	0.909091	0.954545	0.954545	0.580073	0.909091	1	0.540185	0.879473	0.954545	0.5		0	0	0	0.0328701	0	0.345435	0.358354	0.311613	0.350697	0.350265	0.28748	0.14374	0.14374	0.34635	0.28748	0	0.334068	0.293311	0.14374	0.316228
B3GALT3g		1	1	1	0.987656	1	0.764569	0.680027	0.848627	0.598473	0.594647	0.909091	1	1	0.580073	0.909091	1	0.540185	0.879473	1	0.5		0	0	0	0.0328701	0	0.345435	0.358354	0.311613	0.350697	0.350265	0.28748	3.7901e-13	3.7901e-13	0.34635	0.28748	0	0.334068	0.293311	3.7901e-13	0.316228
B3GALT41g		1	1	1	0.987656	1	0.764569	0.680027	0.848627	0.598473	0.594647	0.909091	1	1	0.580073	0.909091	1	0.540185	0.879473	1	0.5		0	0	0	0.0328701	0	0.345435	0.358354	0.311613	0.350697	0.350265	0.28748	3.7901e-13	3.7901e-13	0.34635	0.28748	0	0.334068	0.293311	3.7901e-13	0.316228
B3GALT42g		1	1	1	0.987656	1	0.764569	0.680027	0.848627	0.598473	0.594647	0.909091	1	1	0.580073	0.909091	1	0.540185	0.879473	1	0.5		0	0	0	0.0328701	0	0.345435	0.358354	0.311613	0.350697	0.350265	0.28748	3.7901e-13	3.7901e-13	0.34635	0.28748	0	0.334068	0.293311	3.7901e-13	0.316228
B3GALT43g		1	1	1	0.987656	1	0.764569	0.680027	0.848627	0.598473	0.594647	0.909091	1	1	0.580073	0.909091	1	0.540185	0.879473	1	0.5		0	0	0	0.0328701	0	0.345435	0.358354	0.311613	0.350697	0.350265	0.28748	3.7901e-13	3.7901e-13	0.34635	0.28748	0	0.334068	0.293311	3.7901e-13	0.316228
B3GALT44g		1	1	1	0.987656	1	0.764569	0.680027	0.848627	0.598473	0.594647	0.909091	1	1	0.580073	0.909091	1	0.540185	0.879473	1	0.5		0	0	0	0.0328701	0	0.345435	0.358354	0.311613	0.350697	0.350265	0.28748	3.7901e-13	3.7901e-13	0.34635	0.28748	0	0.334068	0.293311	3.7901e-13	0.316228
B3GNT11g		1	1	1	0.987656	1	0.764569	0.680027	0.848627	0.598473	0.594647	0.909091	1	1	0.580073	0.909091	1	0.540185	0.879473	1	0.5		0	0	0	0.0328701	0	0.345435	0.358354	0.311613	0.350697	0.350265	0.28748	3.7901e-13	3.7901e-13	0.34635	0.28748	0	0.334068	0.293311	3.7901e-13	0.316228
B3GNT12g		1	1	1	0.987656	1	0.764569	0.680027	0.848627	0.598473	0.594647	0.909091	1	1	0.580073	0.909091	1	0.540185	0.879473	1	0.5		0	0	0	0.0328701	0	0.345435	0.358354	0.311613	0.350697	0.350265	0.28748	3.7901e-13	3.7901e-13	0.34635	0.28748	0	0.334068	0.293311	3.7901e-13	0.316228
B3GNT51g		1	1	1	0.987656	1	0.764569	0.680027	0.848627	0.598473	0.594647	0.909091	1	1	0.580073	0.909091	1	0.540185	0.879473	1	0.5		0	0	0	0.0328701	0	0.345435	0.358354	0.311613	0.350697	0.350265	0.28748	3.7901e-13	3.7901e-13	0.34635	0.28748	0	0.334068	0.293311	3.7901e-13	0.316228
BALAVECSEC		1	1	1	0.987656	1	0.764569	0.680027	0.848627	0.598473	0.594647	0.909091	1	1	0.580073	0.909091	1	0.540185	0.879473	1	0.5		0	0	0	0.0328701	0	0.345435	0.358354	0.311613	0.350697	0.350265	0.28748	3.7901e-13	3.7901e-13	0.34635	0.28748	0	0.334068	0.293311	3.7901e-13	0.316228
BALAtmr		1	1	1	0.987656	1	0.764569	0.680027	0.848627	0.598473	0.594647	0.909091	1	1	0.580073	0.909091	1	0.540185	0.879473	1	0.5		0	0	0	0.0328701	0	0.345435	0.358354	0.311613	0.350697	0.350265	0.28748	3.7901e-13	3.7901e-13	0.34635	0.28748	0	0.334068	0.293311	3.7901e-13	0.316228
BAMPPALDOX		1	1	1	0.987656	1	0.764569	0.680027	0.848627	0.598473	0.594647	0.909091	1	1	0.580073	0.909091	1	0.540185	0.879473	1	0.5		0	0	0	0.0328701	0	0.345435	0.358354	0.311613	0.350697	0.350265	0.28748	3.7901e-13	3.7901e-13	0.34635	0.28748	0	0.334068	0.293311	3.7901e-13	0.316228
BAMPPALDOXm		1	1	1	0.987656	1	0.764569	0.680027	0.848627	0.598473	0.594647	0.909091	1	1	0.580073	0.909091	1	0.540185	0.879473	1	0.5		0	0	0	0.0328701	0	0.345435	0.358354	0.311613	0.350697	0.350265	0.28748	3.7901e-13	3.7901e-13	0.34635	0.28748	0	0.334068	0.293311	3.7901e-13	0.316228
BBHOX		1	1	1	0.987656	1	0.764569	0.680027	0.848627	0.598473	0.594647	0.909091	1	1	0.580073	0.909091	1	0.540185	0.879473	1	0.5		0	0	0	0.0328701	0	0.345435	0.358354	0.311613	0.350697	0.350265	0.28748	3.7901e-13	3.7901e-13	0.34635	0.28748	0	0.334068	0.293311	3.7901e-13	0.316228
BDHm		1	1	1	0.987656	1	0.764569	0.680027	0.848627	0.598473	0.594647	0.909091	0.961995	0.954545	0.580073	0.909091	1	0.540185	0.879473	0.954545	0.5		0	0	0	0.0328701	0	0.345435	0.358354	0.311613	0.350697	0.350265	0.28748	0.120184	0.14374	0.34635	0.28748	0	0.334068	0.293311	0.14374	0.316228
BDMT_L		1	1	1	0.987656	1	0.764569	0.680027	0.848627	0.598473	0.594647	0.909091	0.954545	0.954545	0.580073	0.909091	1	0.540185	0.879473	0.954545	0.5		0	0	0	0.0328701	0	0.345435	0.358354	0.311613	0.350697	0.350265	0.28748	0.14374	0.14374	0.34635	0.28748	0	0.334068	0.293311	0.14374	0.316228
BDMT_U		1	1	1	0.987656	1	0.764569	0.680027	0.848627	0.598473	0.594647	0.909091	0.954545	0.954545	0.580073	0.909091	1	0.540185	0.879473	0.954545	0.5		0	0	0	0.0328701	0	0.345435	0.358354	0.311613	0.350697	0.350265	0.28748	0.14374	0.14374	0.34635	0.28748	0	0.334068	0.293311	0.14374	0.316228
BETALDHx		1	1	1	0.987656	1	0.764569	0.680027	0.848627	0.598473	0.594647	0.909091	1	1	0.580073	0.909091	1	0.540185	0.879473	1	0.5		0	0	0	0.0328701	0	0.345435	0.358354	0.311613	0.350697	0.350265	0.28748	3.7901e-13	3.7901e-13	0.34635	0.28748	0	0.334068	0.293311	3.7901e-13	0.316228
BETALDHxm		1	1	1	0.987656	1	0.764569	0.680027	0.848627	0.598473	0.594647	0.909091	0.954552	0.954552	0.580073	0.909091	1	0.540185	0.879473	0.954552	0.5		0	0	0	0.0328701	0	0.345435	0.358354	0.311613	0.350697	0.350265	0.28748	0.14372	0.14372	0.34635	0.28748	0	0.334068	0.293311	0.14372	0.316228
BHBt		1	1	1	0.987656	1	0.764569	0.680027	0.848627	0.598473	0.594647	0.909091	0.961995	0.954545	0.580073	0.909091	1	0.540185	0.879473	0.954545	0.5		0	0	0	0.0328701	0	0.345435	0.358354	0.311613	0.350697	0.350265	0.28748	0.120184	0.14374	0.34635	0.28748	0	0.334068	0.293311	0.14374	0.316228
BHBtm		1	1	1	0.987656	1	0.764569	0.680027	0.848627	0.598473	0.594647	0.909091	0.961995	0.954545	0.580073	0.909091	1	0.540185	0.879473	0.954545	0.5		0	0	0	0.0328701	0	0.345435	0.358354	0.311613	0.350697	0.350265	0.28748	0.120184	0.14374	0.34635	0.28748	0	0.334068	0.293311	0.14374	0.316228
BILDGLCURt		1	1	1	0.987656	1	0.764569	0.680027	0.848627	0.598473	0.594647	0.909091	0.954545	0.954545	0.580073	0.909091	1	0.540185	0.879473	0.954545	0.5		0	0	0	0.0328701	0	0.345435	0.358354	0.311613	0.350697	0.350265	0.28748	0.14374	0.14374	0.34635	0.28748	0	0.334068	0.293311	0.14374	0.316228
BILDGLCURte		1	1	1	0.987656	1	0.764569	0.680027	0.848627	0.598473	0.594647	0.909091	0.954545	0.954545	0.580073	0.909091	1	0.540185	0.879473	0.954545	0.5		0	0	0	0.0328701	0	0.345435	0.358354	0.311613	0.350697	0.350265	0.28748	0.14374	0.14374	0.34635	0.28748	0	0.334068	0.293311	0.14374	0.316228
BILDGLCURtr		1	1	1	0.987656	1	0.764569	0.680027	0.848627	0.598473	0.594647	0.909091	1	1	0.580073	0.909091	1	0.540185	0.879473	1	0.5		0	0	0	0.0328701	0	0.345435	0.358354	0.311613	0.350697	0.350265	0.28748	3.7901e-13	3.7901e-13	0.34635	0.28748	0	0.334068	0.293311	3.7901e-13	0.316228
BILGLCURt		1	1	1	0.987656	1	0.764569	0.680027	0.848627	0.598473	0.594647	0.909091	0.954545	0.954545	0.580073	0.909091	1	0.540185	0.879473	0.954545	0.5		0	0	0	0.0328701	0	0.345435	0.358354	0.311613	0.350697	0.350265	0.28748	0.14374	0.14374	0.34635	0.28748	0	0.334068	0.293311	0.14374	0.316228
BILGLCURte		1	1	1	0.987656	1	0.764569	0.680027	0.848627	0.598473	0.594647	0.909091	0.954545	0.954545	0.580073	0.909091	1	0.540185	0.879473	0.954545	0.5		0	0	0	0.0328701	0	0.345435	0.358354	0.311613	0.350697	0.350265	0.28748	0.14374	0.14374	0.34635	0.28748	0	0.334068	0.293311	0.14374	0.316228
BILGLCURtr		1	1	1	0.987656	1	0.764569	0.680027	0.848627	0.598473	0.594647	0.909091	1	1	0.580073	0.909091	1	0.540185	0.879473	1	0.5		0	0	0	0.0328701	0	0.345435	0.358354	0.311613	0.350697	0.350265	0.28748	3.7901e-13	3.7901e-13	0.34635	0.28748	0	0.334068	0.293311	3.7901e-13	0.316228
BILIRED		1	1	1	0.987656	1	0.764569	0.680027	0.848627	0.598473	0.594647	0.909091	1	1	0.580073	0.909091	1	0.540185	0.879473	1	0.5		0	0	0	0.0328701	0	0.345435	0.358354	0.311613	0.350697	0.350265	0.28748	3.7901e-13	3.7901e-13	0.34635	0.28748	0	0.334068	0.293311	3.7901e-13	0.316228
BILIRUBt2		1	1	1	0.987656	1	0.764569	0.680027	0.848627	0.598473	0.594647	0.909091	1	1	0.580073	0.909091	1	0.540185	0.879473	1	0.5		0	0	0	0.0328701	0	0.345435	0.358354	0.311613	0.350697	0.350265	0.28748	3.7901e-13	3.7901e-13	0.34635	0.28748	0	0.334068	0.293311	3.7901e-13	0.316228
BILIRUBtr		1	1	1	0.987656	1	0.764569	0.680027	0.848627	0.598473	0.594647	0.909091	1	1	0.580073	0.909091	1	0.540185	0.879473	1	0.5		0	0	0	0.0328701	0	0.345435	0.358354	0.311613	0.350697	0.350265	0.28748	3.7901e-13	3.7901e-13	0.34635	0.28748	0	0.334068	0.293311	3.7901e-13	0.316228
BIOCYTtn		1	1	1	0.987656	1	0.764569	0.680027	0.848627	0.598473	0.594647	0.909091	1	1	0.580073	0.909091	1	0.540185	0.879473	1	0.5		0	0	0	0.0328701	0	0.345435	0.358354	0.311613	0.350697	0.350265	0.28748	3.7901e-13	3.7901e-13	0.34635	0.28748	0	0.334068	0.293311	3.7901e-13	0.316228
BMTer_L		1	1	1	0.987656	1	0.764569	0.680027	0.848627	0.598473	0.594647	0.909091	1	1	0.580073	0.909091	1	0.540185	0.879473	1	0.5		0	0	0	0.0328701	0	0.345435	0.358354	0.311613	0.350697	0.350265	0.28748	3.7901e-13	3.7901e-13	0.34635	0.28748	0	0.334068	0.293311	3.7901e-13	0.316228
BMTer_U		1	1	1	0.987656	1	0.764569	0.680027	0.848627	0.598473	0.594647	0.909091	1	1	0.580073	0.909091	1	0.540185	0.879473	1	0.5		0	0	0	0.0328701	0	0.345435	0.358354	0.311613	0.350697	0.350265	0.28748	3.7901e-13	3.7901e-13	0.34635	0.28748	0	0.334068	0.293311	3.7901e-13	0.316228
BPNT		1	1	1	0.987656	1	0.764569	0.680027	0.848627	0.598473	0.594647	0.909091	0.954545	0.954545	0.580073	0.909091	1	0.540185	0.879473	0.954545	0.5		0	0	0	0.0328701	0	0.345435	0.358354	0.311613	0.350697	0.350265	0.28748	0.14374	0.14374	0.34635	0.28748	0	0.334068	0.293311	0.14374	0.316228
BPNT2		1	1	1	0.987656	1	0.764569	0.680027	0.848627	0.598473	0.594647	0.909091	0.954545	0.954545	0.580073	0.909091	1	0.540185	0.879473	0.954545	0.5		0	0	0	0.0328701	0	0.345435	0.358354	0.311613	0.350697	0.350265	0.28748	0.14374	0.14374	0.34635	0.28748	0	0.334068	0.293311	0.14374	0.316228
BTND1		1	1	1	0.987656	1	0.764569	0.680027	0.848627	0.598473	0.594647	0.909091	1	1	0.580073	0.909091	1	0.540185	0.879473	1	0.5		0	0	0	0.0328701	0	0.345435	0.358354	0.311613	0.350697	0.350265	0.28748	3.7901e-13	3.7901e-13	0.34635	0.28748	0	0.334068	0.293311	3.7901e-13	0.316228
BTND1n		1	1	1	0.987656	1	0.764569	0.680027	0.848627	0.598473	0.594647	0.909091	1	1	0.580073	0.909091	1	0.540185	0.879473	1	0.5		0	0	0	0.0328701	0	0.345435	0.358354	0.311613	0.350697	0.350265	0.28748	3.7901e-13	3.7901e-13	0.34635	0.28748	0	0.334068	0.293311	3.7901e-13	0.316228
BTNDe		1	1	1	0.987656	1	0.764569	0.680027	0.848627	0.598473	0.594647	0.909091	1	1	0.580073	0.909091	1	0.540185	0.879473	1	0.5		0	0	0	0.0328701	0	0.345435	0.358354	0.311613	0.350697	0.350265	0.28748	3.7901e-13	3.7901e-13	0.34635	0.28748	0	0.334068	0.293311	3.7901e-13	0.316228
BTNDm		1	1	1	0.987656	1	0.764569	0.680027	0.848627	0.598473	0.594647	0.909091	1	1	0.580073	0.909091	1	0.540185	0.879473	1	0.5		0	0	0	0.0328701	0	0.345435	0.358354	0.311613	0.350697	0.350265	0.28748	3.7901e-13	3.7901e-13	0.34635	0.28748	0	0.334068	0.293311	3.7901e-13	0.316228
BTNPL		1	1	1	0.987656	1	0.764569	0.680027	0.848627	0.598473	0.594647	0.909091	1	1	0.580073	0.909091	1	0.540185	0.879473	1	0.5		0	0	0	0.0328701	0	0.345435	0.358354	0.311613	0.350697	0.350265	0.28748	3.7901e-13	3.7901e-13	0.34635	0.28748	0	0.334068	0.293311	3.7901e-13	0.316228
BTNPLm		1	1	1	0.987656	1	0.764569	0.680027	0.848627	0.598473	0.594647	0.909091	1	1	0.580073	0.909091	1	0.540185	0.879473	1	0.5		0	0	0	0.0328701	0	0.345435	0.358354	0.311613	0.350697	0.350265	0.28748	3.7901e-13	3.7901e-13	0.34635	0.28748	0	0.334068	0.293311	3.7901e-13	0.316228
BTNt2		1	1	1	0.987656	1	0.764569	0.680027	0.848627	0.598473	0.594647	0.909091	1	1	0.580073	0.909091	1	0.540185	0.879473	1	0.5		0	0	0	0.0328701	0	0.345435	0.358354	0.311613	0.350697	0.350265	0.28748	3.7901e-13	3.7901e-13	0.34635	0.28748	0	0.334068	0.293311	3.7901e-13	0.316228
BTNt2m		1	1	1	0.987656	1	0.764569	0.680027	0.848627	0.598473	0.594647	0.909091	1	1	0.580073	0.909091	1	0.540185	0.879473	1	0.5		0	0	0	0.0328701	0	0.345435	0.358354	0.311613	0.350697	0.350265	0.28748	3.7901e-13	3.7901e-13	0.34635	0.28748	0	0.334068	0.293311	3.7901e-13	0.316228
BTNt3i		1	1	1	0.987656	1	0.764569	0.680027	0.848627	0.598473	0.594647	0.909091	0.954545	0.954545	0.580073	0.909091	1	0.540185	0.879473	0.954545	0.5		0	0	0	0.0328701	0	0.345435	0.358354	0.311613	0.350697	0.350265	0.28748	0.14374	0.14374	0.34635	0.28748	0	0.334068	0.293311	0.14374	0.316228
BTNt4i		1	1	1	0.987656	1	0.764569	0.680027	0.848627	0.598473	0.594647	0.909091	1	1	0.580073	0.909091	1	0.540185	0.879473	1	0.5		0	0	0	0.0328701	0	0.345435	0.358354	0.311613	0.350697	0.350265	0.28748	3.7901e-13	3.7901e-13	0.34635	0.28748	0	0.334068	0.293311	3.7901e-13	0.316228
BTNtn		1	1	1	0.987656	1	0.764569	0.680027	0.848627	0.598473	0.594647	0.909091	1	1	0.580073	0.909091	1	0.540185	0.879473	1	0.5		0	0	0	0.0328701	0	0.345435	0.358354	0.311613	0.350697	0.350265	0.28748	3.7901e-13	3.7901e-13	0.34635	0.28748	0	0.334068	0.293311	3.7901e-13	0.316228
BUTt2m		1	1	1	0.987656	1	0.764569	0.680027	0.848627	0.598473	0.594647	0.909091	1	1	0.580073	0.909091	1	0.540185	0.879473	1	0.5		0	0	0	0.0328701	0	0.345435	0.358354	0.311613	0.350697	0.350265	0.28748	3.7901e-13	3.7901e-13	0.34635	0.28748	0	0.334068	0.293311	3.7901e-13	0.316228
BUTt2r		1	1	1	0.987656	1	0.764569	0.680027	0.848627	0.598473	0.594647	0.909091	1	1	0.580073	0.909091	1	0.540185	0.879473	1	0.5		0	0	0	0.0328701	0	0.345435	0.358354	0.311613	0.350697	0.350265	0.28748	3.7901e-13	3.7901e-13	0.34635	0.28748	0	0.334068	0.293311	3.7901e-13	0.316228
BVITEt		1	1	1	0.987656	1	0.764569	0.680027	0.848627	0.598473	0.594647	0.909091	1	1	0.580073	0.909091	1	0.540185	0.879473	1	0.5		0	0	0	0.0328701	0	0.345435	0.358354	0.311613	0.350697	0.350265	0.28748	3.7901e-13	3.7901e-13	0.34635	0.28748	0	0.334068	0.293311	3.7901e-13	0.316228
BZt		1	1	1	0.987656	1	0.764569	0.680027	0.848627	0.598473	0.594647	0.909091	1	1	0.580073	0.909091	1	0.540185	0.879473	1	0.5		0	0	0	0.0328701	0	0.345435	0.358354	0.311613	0.350697	0.350265	0.28748	3.7901e-13	3.7901e-13	0.34635	0.28748	0	0.334068	0.293311	3.7901e-13	0.316228
BZtr		1	1	1	0.987656	1	0.764569	0.680027	0.848627	0.598473	0.594647	0.909091	1	1	0.580073	0.909091	1	0.540185	0.879473	1	0.5		0	0	0	0.0328701	0	0.345435	0.358354	0.311613	0.350697	0.350265	0.28748	3.7901e-13	3.7901e-13	0.34635	0.28748	0	0.334068	0.293311	3.7901e-13	0.316228
B_MANNASEly		1	1	1	0.987656	1	0.764569	0.680027	0.848627	0.598473	0.594647	0.909091	0.954545	0.954545	0.580073	0.909091	1	0.540185	0.879473	0.954545	0.5		0	0	0	0.0328701	0	0.345435	0.358354	0.311613	0.350697	0.350265	0.28748	0.14374	0.14374	0.34635	0.28748	0	0.334068	0.293311	0.14374	0.316228
C14STRr		1	1	1	0.987656	1	0.764569	0.680027	0.848627	0.598473	0.594647	0.909091	0.956574	0.956474	0.580073	0.909091	1	0.540185	0.879473	0.956569	0.5		0	0	0	0.0328701	0	0.345435	0.358354	0.311613	0.350697	0.350265	0.28748	0.137325	0.13764	0.34635	0.28748	0	0.334068	0.293311	0.13734	0.316228
C160CPT1		1	1	1	0.987656	1	0.764569	0.680027	0.848627	0.598473	0.594647	0.909091	1	1	0.580073	0.909091	1	0.540185	0.879473	1	0.5		0	0	0	0.0328701	0	0.345435	0.358354	0.311613	0.350697	0.350265	0.28748	3.7901e-13	3.7901e-13	0.34635	0.28748	0	0.334068	0.293311	3.7901e-13	0.316228
C160CPT2		1	1	1	0.987656	1	0.764569	0.680027	0.848627	0.598473	0.594647	0.909091	1	1	0.580073	0.909091	1	0.540185	0.879473	1	0.5		0	0	0	0.0328701	0	0.345435	0.358354	0.311613	0.350697	0.350265	0.28748	3.7901e-13	3.7901e-13	0.34635	0.28748	0	0.334068	0.293311	3.7901e-13	0.316228
C160CRNt		1	1	1	0.987656	1	0.764569	0.680027	0.848627	0.598473	0.594647	0.909091	1	1	0.580073	0.909091	1	0.540185	0.879473	1	0.5		0	0	0	0.0328701	0	0.345435	0.358354	0.311613	0.350697	0.350265	0.28748	3.7901e-13	3.7901e-13	0.34635	0.28748	0	0.334068	0.293311	3.7901e-13	0.316228
C161CPT1		1	1	1	0.987656	1	0.764569	0.680027	0.848627	0.598473	0.594647	0.909091	1	1	0.580073	0.909091	1	0.540185	0.879473	1	0.5		0	0	0	0.0328701	0	0.345435	0.358354	0.311613	0.350697	0.350265	0.28748	3.7901e-13	3.7901e-13	0.34635	0.28748	0	0.334068	0.293311	3.7901e-13	0.316228
C161CPT12		1	1	1	0.987656	1	0.764569	0.680027	0.848627	0.598473	0.594647	0.909091	1	1	0.580073	0.909091	1	0.540185	0.879473	1	0.5		0	0	0	0.0328701	0	0.345435	0.358354	0.311613	0.350697	0.350265	0.28748	3.7901e-13	3.7901e-13	0.34635	0.28748	0	0.334068	0.293311	3.7901e-13	0.316228
C161CPT2		1	1	1	0.987656	1	0.764569	0.680027	0.848627	0.598473	0.594647	0.909091	1	1	0.580073	0.909091	1	0.540185	0.879473	1	0.5		0	0	0	0.0328701	0	0.345435	0.358354	0.311613	0.350697	0.350265	0.28748	3.7901e-13	3.7901e-13	0.34635	0.28748	0	0.334068	0.293311	3.7901e-13	0.316228
C161CPT22		1	1	1	0.987656	1	0.764569	0.680027	0.848627	0.598473	0.594647	0.909091	1	1	0.580073	0.909091	1	0.540185	0.879473	1	0.5		0	0	0	0.0328701	0	0.345435	0.358354	0.311613	0.350697	0.350265	0.28748	3.7901e-13	3.7901e-13	0.34635	0.28748	0	0.334068	0.293311	3.7901e-13	0.316228
C161CRN2t		1	1	1	0.987656	1	0.764569	0.680027	0.848627	0.598473	0.594647	0.909091	1	1	0.580073	0.909091	1	0.540185	0.879473	1	0.5		0	0	0	0.0328701	0	0.345435	0.358354	0.311613	0.350697	0.350265	0.28748	3.7901e-13	3.7901e-13	0.34635	0.28748	0	0.334068	0.293311	3.7901e-13	0.316228
C161CRNt		1	1	1	0.987656	1	0.764569	0.680027	0.848627	0.598473	0.594647	0.909091	1	1	0.580073	0.909091	1	0.540185	0.879473	1	0.5		0	0	0	0.0328701	0	0.345435	0.358354	0.311613	0.350697	0.350265	0.28748	3.7901e-13	3.7901e-13	0.34635	0.28748	0	0.334068	0.293311	3.7901e-13	0.316228
C180CPT1		1	1	1	0.987656	1	0.764569	0.680027	0.830634	0.598473	0.594647	0.909091	0.954545	0.954545	0.580073	0.909091	1	0.540185	0.879473	0.954545	0.5		0	0	0	0.0328701	0	0.345435	0.358354	0.320326	0.350697	0.350265	0.28748	0.14374	0.14374	0.34635	0.28748	0	0.334068	0.293311	0.14374	0.316228
C180CPT2		1	1	1	0.987656	1	0.764569	0.680027	0.830634	0.598473	0.594647	0.909091	0.954545	0.954545	0.580073	0.909091	1	0.540185	0.879473	0.954545	0.5		0	0	0	0.0328701	0	0.345435	0.358354	0.320326	0.350697	0.350265	0.28748	0.14374	0.14374	0.34635	0.28748	0	0.334068	0.293311	0.14374	0.316228
C180CRNt		1	1	1	0.987656	1	0.764569	0.680027	0.830634	0.598473	0.594647	0.909091	0.954545	0.954545	0.580073	0.909091	1	0.540185	0.879473	0.954545	0.5		0	0	0	0.0328701	0	0.345435	0.358354	0.320326	0.350697	0.350265	0.28748	0.14374	0.14374	0.34635	0.28748	0	0.334068	0.293311	0.14374	0.316228
C181CPT1		1	1	1	0.987656	1	0.764569	0.680027	0.830689	0.598473	0.594647	0.909091	0.954545	0.954545	0.580073	0.909091	1	0.540185	0.879473	0.954545	0.5		0	0	0	0.0328701	0	0.345435	0.358354	0.320291	0.350697	0.350265	0.28748	0.14374	0.14374	0.34635	0.28748	0	0.334068	0.293311	0.14374	0.316228
C181CPT2		1	1	1	0.987656	1	0.764569	0.680027	0.830689	0.598473	0.594647	0.909091	0.954545	0.954545	0.580073	0.909091	1	0.540185	0.879473	0.954545	0.5		0	0	0	0.0328701	0	0.345435	0.358354	0.320291	0.350697	0.350265	0.28748	0.14374	0.14374	0.34635	0.28748	0	0.334068	0.293311	0.14374	0.316228
C181CRNt		1	1	1	0.987656	1	0.764569	0.680027	0.830689	0.598473	0.594647	0.909091	0.954545	0.954545	0.580073	0.909091	1	0.540185	0.879473	0.954545	0.5		0	0	0	0.0328701	0	0.345435	0.358354	0.320291	0.350697	0.350265	0.28748	0.14374	0.14374	0.34635	0.28748	0	0.334068	0.293311	0.14374	0.316228
C204CPT1		1	1	1	0.987656	1	0.764569	0.680027	0.848627	0.598473	0.594647	0.909091	1	1	0.580073	0.909091	1	0.540185	0.879473	1	0.5		0	0	0	0.0328701	0	0.345435	0.358354	0.311613	0.350697	0.350265	0.28748	3.7901e-13	3.7901e-13	0.34635	0.28748	0	0.334068	0.293311	3.7901e-13	0.316228
C204CPT2		1	1	1	0.987656	1	0.764569	0.680027	0.848627	0.598473	0.594647	0.909091	1	1	0.580073	0.909091	1	0.540185	0.879473	1	0.5		0	0	0	0.0328701	0	0.345435	0.358354	0.311613	0.350697	0.350265	0.28748	3.7901e-13	3.7901e-13	0.34635	0.28748	0	0.334068	0.293311	3.7901e-13	0.316228
C204CRNt		1	1	1	0.987656	1	0.764569	0.680027	0.848627	0.598473	0.594647	0.909091	1	1	0.580073	0.909091	1	0.540185	0.879473	1	0.5		0	0	0	0.0328701	0	0.345435	0.358354	0.311613	0.350697	0.350265	0.28748	3.7901e-13	3.7901e-13	0.34635	0.28748	0	0.334068	0.293311	3.7901e-13	0.316228
C226COAtx		1	1	1	0.987656	1	0.764569	0.680027	0.848627	0.598473	0.594647	0.909091	1	1	0.580073	0.909091	1	0.540185	0.879473	1	0.5		0	0	0	0.0328701	0	0.345435	0.358354	0.311613	0.350697	0.350265	0.28748	3.7901e-13	3.7901e-13	0.34635	0.28748	0	0.334068	0.293311	3.7901e-13	0.316228
C226CPT1		1	1	1	0.987656	1	0.764569	0.680027	0.848627	0.598473	0.594647	0.909091	1	1	0.580073	0.909091	1	0.540185	0.879473	1	0.5		0	0	0	0.0328701	0	0.345435	0.358354	0.311613	0.350697	0.350265	0.28748	3.7901e-13	3.7901e-13	0.34635	0.28748	0	0.334068	0.293311	3.7901e-13	0.316228
C226CPT2		1	1	1	0.987656	1	0.764569	0.680027	0.848627	0.598473	0.594647	0.909091	1	1	0.580073	0.909091	1	0.540185	0.879473	1	0.5		0	0	0	0.0328701	0	0.345435	0.358354	0.311613	0.350697	0.350265	0.28748	3.7901e-13	3.7901e-13	0.34635	0.28748	0	0.334068	0.293311	3.7901e-13	0.316228
C226CRNt		1	1	1	0.987656	1	0.764569	0.680027	0.848627	0.598473	0.594647	0.909091	1	1	0.580073	0.909091	1	0.540185	0.879473	1	0.5		0	0	0	0.0328701	0	0.345435	0.358354	0.311613	0.350697	0.350265	0.28748	3.7901e-13	3.7901e-13	0.34635	0.28748	0	0.334068	0.293311	3.7901e-13	0.316228
C2M26DCOAHLm		1	1	1	0.987656	1	0.764569	0.680027	0.848627	0.598473	0.594647	0.909091	1	1	0.580073	0.909091	1	0.540185	0.879473	1	0.5		0	0	0	0.0328701	0	0.345435	0.358354	0.311613	0.350697	0.350265	0.28748	3.7901e-13	3.7901e-13	0.34635	0.28748	0	0.334068	0.293311	3.7901e-13	0.316228
C2M26DCOAHLx		1	1	1	0.987656	1	0.764569	0.680027	0.848627	0.598473	0.594647	0.909091	1	1	0.580073	0.909091	1	0.540185	0.879473	1	0.5		0	0	0	0.0328701	0	0.345435	0.358354	0.311613	0.350697	0.350265	0.28748	3.7901e-13	3.7901e-13	0.34635	0.28748	0	0.334068	0.293311	3.7901e-13	0.316228
C3STDH1Pr		1	1	1	0.987656	1	0.764569	0.680027	0.848627	0.598473	0.594647	0.909091	0.956574	0.956474	0.580073	0.909091	1	0.540185	0.879473	0.956569	0.5		0	0	0	0.0328701	0	0.345435	0.358354	0.311613	0.350697	0.350265	0.28748	0.137325	0.13764	0.34635	0.28748	0	0.334068	0.293311	0.13734	0.316228
C3STDH1r		1	1	1	0.987656	1	0.764569	0.680027	0.848627	0.598473	0.594647	0.909091	0.956574	0.956474	0.580073	0.909091	1	0.540185	0.879473	0.956569	0.5		0	0	0	0.0328701	0	0.345435	0.358354	0.311613	0.350697	0.350265	0.28748	0.137325	0.13764	0.34635	0.28748	0	0.334068	0.293311	0.13734	0.316228
C3STKR2r		1	1	1	0.987656	1	0.764569	0.680027	0.848627	0.598473	0.594647	0.909091	0.956574	0.956474	0.580073	0.909091	1	0.540185	0.879473	0.956569	0.5		0	0	0	0.0328701	0	0.345435	0.358354	0.311613	0.350697	0.350265	0.28748	0.137325	0.13764	0.34635	0.28748	0	0.334068	0.293311	0.13734	0.316228
C4STMO1r		1	1	1	0.987656	1	0.764569	0.680027	0.848627	0.598473	0.594647	0.909091	0.956574	0.956474	0.580073	0.909091	1	0.540185	0.879473	0.956569	0.5		0	0	0	0.0328701	0	0.345435	0.358354	0.311613	0.350697	0.350265	0.28748	0.137325	0.13764	0.34635	0.28748	0	0.334068	0.293311	0.13734	0.316228
C4STMO2Pr		1	1	1	0.987656	1	0.764569	0.680027	0.848627	0.598473	0.594647	0.909091	0.956574	0.956474	0.580073	0.909091	1	0.540185	0.879473	0.956569	0.5		0	0	0	0.0328701	0	0.345435	0.358354	0.311613	0.350697	0.350265	0.28748	0.137325	0.13764	0.34635	0.28748	0	0.334068	0.293311	0.13734	0.316228
C4STMO2r		1	1	1	0.987656	1	0.764569	0.680027	0.848627	0.598473	0.594647	0.909091	0.956574	0.956474	0.580073	0.909091	1	0.540185	0.879473	0.956569	0.5		0	0	0	0.0328701	0	0.345435	0.358354	0.311613	0.350697	0.350265	0.28748	0.137325	0.13764	0.34635	0.28748	0	0.334068	0.293311	0.13734	0.316228
CAATPS		1	1	1	0.987656	1	0.764569	0.680027	0.848627	0.598473	0.594647	0.909091	0.954545	0.954545	0.580073	0.909091	1	0.540185	0.879473	0.954545	0.5		0	0	0	0.0328701	0	0.345435	0.358354	0.311613	0.350697	0.350265	0.28748	0.14374	0.14374	0.34635	0.28748	0	0.334068	0.293311	0.14374	0.316228
CAMPt		1	1	1	0.987656	1	0.764569	0.680027	0.815713	0.590283	0.594647	0.909091	0.954545	0.954545	0.571045	0.909091	1	0.540185	0.876902	0.954545	0.5		0	0	0	0.0328701	0	0.345435	0.358354	0.32077	0.348784	0.350265	0.28748	0.14374	0.14374	0.343571	0.28748	0	0.334068	0.295217	0.14374	0.316228
CAT2p		1	1	1	0.987656	1	0.764569	0.680027	0.848627	0.598473	0.594647	0.909091	1	1	0.580073	0.909091	1	0.540185	0.879473	1	0.5		0	0	0	0.0328701	0	0.345435	0.358354	0.311613	0.350697	0.350265	0.28748	3.7901e-13	3.7901e-13	0.34635	0.28748	0	0.334068	0.293311	3.7901e-13	0.316228
CATm		1	1	1	0.987656	1	0.764569	0.680027	0.848627	0.598473	0.594647	0.909091	0.954545	0.954545	0.580073	0.909091	1	0.540185	0.879473	0.954545	0.5		0	0	0	0.0328701	0	0.345435	0.358354	0.311613	0.350697	0.350265	0.28748	0.14374	0.14374	0.34635	0.28748	0	0.334068	0.293311	0.14374	0.316228
CATp		1	1	1	0.987656	1	0.764569	0.680027	0.848627	0.598473	0.594647	0.909091	0.954545	0.954545	0.580073	0.909091	1	0.540185	0.879473	0.954545	0.5		0	0	0	0.0328701	0	0.345435	0.358354	0.311613	0.350697	0.350265	0.28748	0.14374	0.14374	0.34635	0.28748	0	0.334068	0.293311	0.14374	0.316228
CAt7r		1	1	1	0.987656	1	0.764569	0.680027	0.848627	0.598473	0.594647	0.909091	1	1	0.580073	0.909091	1	0.540185	0.879473	1	0.5		0	0	0	0.0328701	0	0.345435	0.358354	0.311613	0.350697	0.350265	0.28748	3.7901e-13	3.7901e-13	0.34635	0.28748	0	0.334068	0.293311	3.7901e-13	0.316228
CBL2OR		1	1	1	0.987656	1	0.764569	0.680027	0.848627	0.598473	0.594647	0.909091	1	1	0.580073	0.909091	1	0.540185	0.879473	1	0.5		0	0	0	0.0328701	0	0.345435	0.358354	0.311613	0.350697	0.350265	0.28748	3.7901e-13	3.7901e-13	0.34635	0.28748	0	0.334068	0.293311	3.7901e-13	0.316228
CBL2tm		1	1	1	0.987656	1	0.764569	0.680027	0.848627	0.598473	0.594647	0.909091	1	1	0.580073	0.909091	1	0.540185	0.879473	1	0.5		0	0	0	0.0328701	0	0.345435	0.358354	0.311613	0.350697	0.350265	0.28748	3.7901e-13	3.7901e-13	0.34635	0.28748	0	0.334068	0.293311	3.7901e-13	0.316228
CBLATm		1	1	1	0.987656	1	0.764569	0.680027	0.848627	0.598473	0.594647	0.909091	1	1	0.580073	0.909091	1	0.540185	0.879473	1	0.5		0	0	0	0.0328701	0	0.345435	0.358354	0.311613	0.350697	0.350265	0.28748	3.7901e-13	3.7901e-13	0.34635	0.28748	0	0.334068	0.293311	3.7901e-13	0.316228
CBPPer		1	1	1	0.987656	1	0.764569	0.680027	0.848627	0.598473	0.594647	0.909091	1	1	0.580073	0.909091	1	0.540185	0.879473	1	0.5		0	0	0	0.0328701	0	0.345435	0.358354	0.311613	0.350697	0.350265	0.28748	3.7901e-13	3.7901e-13	0.34635	0.28748	0	0.334068	0.293311	3.7901e-13	0.316228
CBPS		0.848214	0.848214	0.797909	0.827081	0.848214	0.648432	0.561491	0.687403	0.480866	0.521	0.712242	0.816558	0.816558	0.464144	0.771104	0.848214	0.472423	0.74147	0.816558	0.433636		2.03782e-15	3.33067e-16	0.0601669	0.042333	4.73401e-16	0.293014	0.302794	0.270207	0.287965	0.298804	0.233668	0.100105	0.100105	0.282578	0.243844	1.06647e-15	0.287465	0.252333	0.100105	0.272308
CBPSam		1	1	1	0.987656	1	0.764569	0.680027	0.815713	0.590283	0.594647	0.909091	0.954545	0.954545	0.571045	0.909091	1	0.540185	0.876902	0.954545	0.5		0	0	0	0.0328701	0	0.345435	0.358354	0.32077	0.348784	0.350265	0.28748	0.14374	0.14374	0.343571	0.28748	0	0.334068	0.295217	0.14374	0.316228
CBPter		1	1	1	0.987656	1	0.764569	0.680027	0.848627	0.598473	0.594647	0.909091	1	1	0.580073	0.909091	1	0.540185	0.879473	1	0.5		0	0	0	0.0328701	0	0.345435	0.358354	0.311613	0.350697	0.350265	0.28748	3.7901e-13	3.7901e-13	0.34635	0.28748	0	0.334068	0.293311	3.7901e-13	0.316228
CBR1		1	1	1	0.987656	1	0.764569	0.680027	0.848627	0.598473	0.594647	0.909091	1	1	0.580073	0.909091	1	0.540185	0.879473	1	0.5		0	0	0	0.0328701	0	0.345435	0.358354	0.311613	0.350697	0.350265	0.28748	3.7901e-13	3.7901e-13	0.34635	0.28748	0	0.334068	0.293311	3.7901e-13	0.316228
CBR2		1	1	1	0.987656	1	0.764569	0.680027	0.848627	0.598473	0.594647	0.909091	1	1	0.580073	0.909091	1	0.540185	0.879473	1	0.5		0	0	0	0.0328701	0	0.345435	0.358354	0.311613	0.350697	0.350265	0.28748	3.7901e-13	3.7901e-13	0.34635	0.28748	0	0.334068	0.293311	3.7901e-13	0.316228
CCA_D3t		1	1	1	0.987656	1	0.764569	0.680027	0.848627	0.598473	0.594647	0.909091	1	1	0.580073	0.909091	1	0.540185	0.879473	1	0.5		0	0	0	0.0328701	0	0.345435	0.358354	0.311613	0.350697	0.350265	0.28748	3.7901e-13	3.7901e-13	0.34635	0.28748	0	0.334068	0.293311	3.7901e-13	0.316228
CDIPTr		1	1	1	0.987656	1	0.764569	0.680027	0.848627	0.598473	0.594647	0.909091	0.954545	0.954545	0.580073	0.909091	1	0.540185	0.879473	0.954545	0.5		0	0	0	0.0328701	0	0.345435	0.358354	0.311613	0.350697	0.350265	0.28748	0.14374	0.14374	0.34635	0.28748	0	0.334068	0.293311	0.14374	0.316228
CDPDAGtm		1	1	1	0.987634	1	0.764569	0.680027	0.848627	0.598473	0.594647	0.909091	0.954929	0.954929	0.580073	0.909091	1	0.540185	0.879473	0.954929	0.5		0	0	0	0.0329055	0	0.345435	0.358354	0.311613	0.350697	0.350265	0.28748	0.142528	0.142528	0.34635	0.28748	0	0.334068	0.293311	0.142528	0.316228
CDS		1	1	1	0.987656	1	0.764569	0.680027	0.848627	0.598473	0.594647	0.909091	0.954545	0.954545	0.580073	0.909091	1	0.540185	0.879473	0.954545	0.5		0	0	0	0.0328701	0	0.345435	0.358354	0.311613	0.350697	0.350265	0.28748	0.14374	0.14374	0.34635	0.28748	0	0.334068	0.293311	0.14374	0.316228
CDSm		1	1	1	0.987634	1	0.764569	0.680027	0.848627	0.598473	0.594647	0.909091	0.954929	0.954929	0.580073	0.909091	1	0.540185	0.879473	0.954929	0.5		0	0	0	0.0329055	0	0.345435	0.358354	0.311613	0.350697	0.350265	0.28748	0.142528	0.142528	0.34635	0.28748	0	0.334068	0.293311	0.142528	0.316228
CEPTC		1	1	1	0.987656	1	0.764569	0.680027	0.848627	0.598473	0.594647	0.909091	0.954545	0.954545	0.580073	0.909091	1	0.540185	0.879473	0.954545	0.5		0	0	0	0.0328701	0	0.345435	0.358354	0.311613	0.350697	0.350265	0.28748	0.14374	0.14374	0.34635	0.28748	0	0.334068	0.293311	0.14374	0.316228
CEPTE		1	1	1	0.987656	1	0.764569	0.680027	0.848627	0.598473	0.594647	0.909091	0.954545	0.954545	0.580073	0.909091	1	0.540185	0.879473	0.954545	0.5		0	0	0	0.0328701	0	0.345435	0.358354	0.311613	0.350697	0.350265	0.28748	0.14374	0.14374	0.34635	0.28748	0	0.334068	0.293311	0.14374	0.316228
CERK		1	1	1	0.987656	1	0.764569	0.680027	0.84814	0.598473	0.594647	0.909091	0.954544	0.973925	0.580073	0.909091	1	0.540185	0.879473	0.971685	0.5		0	0	0	0.0328701	0	0.345435	0.358354	0.31138	0.350697	0.350265	0.28748	0.143744	0.0824559	0.34635	0.28748	0	0.334068	0.293311	0.0895394	0.316228
CERT1gt		1	1	1	0.987656	1	0.764569	0.680027	0.848627	0.598473	0.594647	0.909091	0.954545	0.954545	0.580073	0.909091	1	0.540185	0.879473	0.954545	0.5		0	0	0	0.0328701	0	0.345435	0.358354	0.311613	0.350697	0.350265	0.28748	0.14374	0.14374	0.34635	0.28748	0	0.334068	0.293311	0.14374	0.316228
CERT1rt		1	1	1	0.987656	1	0.764569	0.680027	0.848627	0.598473	0.594647	0.909091	0.954545	0.954545	0.580073	0.909091	1	0.540185	0.879473	0.954545	0.5		0	0	0	0.0328701	0	0.345435	0.358354	0.311613	0.350697	0.350265	0.28748	0.14374	0.14374	0.34635	0.28748	0	0.334068	0.293311	0.14374	0.316228
CERT2gt		1	1	1	0.987656	1	0.764569	0.680027	0.848627	0.598473	0.594647	0.909091	1	1	0.580073	0.909091	1	0.540185	0.879473	1	0.5		0	0	0	0.0328701	0	0.345435	0.358354	0.311613	0.350697	0.350265	0.28748	3.7901e-13	3.7901e-13	0.34635	0.28748	0	0.334068	0.293311	3.7901e-13	0.316228
CERT2rt		1	1	1	0.987656	1	0.764569	0.680027	0.848627	0.598473	0.594647	0.909091	0.954545	0.954545	0.580073	0.909091	1	0.540185	0.879473	0.954545	0.5		0	0	0	0.0328701	0	0.345435	0.358354	0.311613	0.350697	0.350265	0.28748	0.14374	0.14374	0.34635	0.28748	0	0.334068	0.293311	0.14374	0.316228
CGLYt3(2)		1	1	1	0.987656	1	0.764569	0.680027	0.848627	0.598473	0.594647	0.909091	0.954545	0.954545	0.580073	0.909091	1	0.540185	0.879473	0.954545	0.5		0	0	0	0.0328701	0	0.345435	0.358354	0.311613	0.350697	0.350265	0.28748	0.14374	0.14374	0.34635	0.28748	0	0.334068	0.293311	0.14374	0.316228
CGMPt		1	1	1	0.987656	1	0.764569	0.680027	0.815713	0.590283	0.594647	0.909091	0.954545	0.954545	0.571045	0.909091	1	0.540185	0.876902	0.954545	0.5		0	0	0	0.0328701	0	0.345435	0.358354	0.32077	0.348784	0.350265	0.28748	0.14374	0.14374	0.343571	0.28748	0	0.334068	0.295217	0.14374	0.316228
CHLP		1	1	1	0.987656	1	0.764569	0.680027	0.848627	0.598473	0.594647	0.909091	0.954545	0.954545	0.580073	0.909091	1	0.540185	0.879473	0.954545	0.5		0	0	0	0.0328701	0	0.345435	0.358354	0.311613	0.350697	0.350265	0.28748	0.14374	0.14374	0.34635	0.28748	0	0.334068	0.293311	0.14374	0.316228
CHLPCTD		1	1	1	0.987656	1	0.764569	0.680027	0.848627	0.598473	0.594647	0.909091	0.954545	0.954545	0.580073	0.909091	1	0.540185	0.879473	0.954545	0.5		0	0	0	0.0328701	0	0.345435	0.358354	0.311613	0.350697	0.350265	0.28748	0.14374	0.14374	0.34635	0.28748	0	0.334068	0.293311	0.14374	0.316228
CHLtm		1	1	1	0.987634	1	0.764569	0.680027	0.848627	0.598473	0.594647	0.909091	0.954552	0.954552	0.580073	0.909091	1	0.540185	0.879473	0.954552	0.5		0	0	0	0.0329055	0	0.345435	0.358354	0.311613	0.350697	0.350265	0.28748	0.14372	0.14372	0.34635	0.28748	0	0.334068	0.293311	0.14372	0.316228
CHOLATEt		1	1	1	0.987656	1	0.764569	0.680027	0.848627	0.598473	0.594647	0.909091	1	1	0.580073	0.909091	1	0.540185	0.879473	1	0.5		0	0	0	0.0328701	0	0.345435	0.358354	0.311613	0.350697	0.350265	0.28748	3.7901e-13	3.7901e-13	0.34635	0.28748	0	0.334068	0.293311	3.7901e-13	0.316228
CHOLATEt2		1	1	1	0.987656	1	0.764569	0.680027	0.848627	0.598473	0.594647	0.909091	1	1	0.580073	0.909091	1	0.540185	0.879473	1	0.5		0	0	0	0.0328701	0	0.345435	0.358354	0.311613	0.350697	0.350265	0.28748	3.7901e-13	3.7901e-13	0.34635	0.28748	0	0.334068	0.293311	3.7901e-13	0.316228
CHOLD2m		1	1	1	0.987656	1	0.764569	0.680027	0.848627	0.598473	0.594647	0.909091	0.954552	0.954552	0.580073	0.909091	1	0.540185	0.879473	0.954552	0.5		0	0	0	0.0328701	0	0.345435	0.358354	0.311613	0.350697	0.350265	0.28748	0.14372	0.14372	0.34635	0.28748	0	0.334068	0.293311	0.14372	0.316228
CHOLK		1	1	1	0.987656	1	0.764569	0.680027	0.848627	0.598473	0.594647	0.909091	0.954545	0.954545	0.580073	0.909091	1	0.540185	0.879473	0.954545	0.5		0	0	0	0.0328701	0	0.345435	0.358354	0.311613	0.350697	0.350265	0.28748	0.14374	0.14374	0.34635	0.28748	0	0.334068	0.293311	0.14374	0.316228
CHOLPtg		1	1	1	0.987656	1	0.764569	0.680027	0.848627	0.598473	0.594647	0.909091	0.954545	0.954545	0.580073	0.909091	1	0.540185	0.879473	0.954545	0.5		0	0	0	0.0328701	0	0.345435	0.358354	0.311613	0.350697	0.350265	0.28748	0.14374	0.14374	0.34635	0.28748	0	0.334068	0.293311	0.14374	0.316228
CHOLPtl		1	1	1	0.987656	1	0.764569	0.680027	0.848627	0.598473	0.594647	0.909091	0.954831	0.954822	0.580073	0.909091	1	0.540185	0.879473	0.954822	0.5		0	0	0	0.0328701	0	0.345435	0.358354	0.311613	0.350697	0.350265	0.28748	0.142837	0.142866	0.34635	0.28748	0	0.334068	0.293311	0.142866	0.316228
CHOLt4		1	1	1	0.987656	1	0.764569	0.680027	0.848627	0.598473	0.594647	0.909091	1	1	0.580073	0.909091	1	0.540185	0.879473	1	0.5		0	0	0	0.0328701	0	0.345435	0.358354	0.311613	0.350697	0.350265	0.28748	3.7901e-13	3.7901e-13	0.34635	0.28748	0	0.334068	0.293311	3.7901e-13	0.316228
CHOLtg		1	1	1	0.987656	1	0.764569	0.680027	0.848627	0.598473	0.594647	0.909091	0.954545	0.954545	0.580073	0.909091	1	0.540185	0.879473	0.954545	0.5		0	0	0	0.0328701	0	0.345435	0.358354	0.311613	0.350697	0.350265	0.28748	0.14374	0.14374	0.34635	0.28748	0	0.334068	0.293311	0.14374	0.316228
CHOLtn		1	1	1	0.987656	1	0.764569	0.680027	0.848627	0.598473	0.594647	0.909091	1	1	0.580073	0.909091	1	0.540185	0.879473	1	0.5		0	0	0	0.0328701	0	0.345435	0.358354	0.311613	0.350697	0.350265	0.28748	3.7901e-13	3.7901e-13	0.34635	0.28748	0	0.334068	0.293311	3.7901e-13	0.316228
CHOLtr		1	1	1	0.987656	1	0.764569	0.680027	0.848627	0.598473	0.594647	0.909091	0.954545	0.954545	0.580073	0.909091	1	0.540185	0.879473	0.954545	0.5		0	0	0	0.0328701	0	0.345435	0.358354	0.311613	0.350697	0.350265	0.28748	0.14374	0.14374	0.34635	0.28748	0	0.334068	0.293311	0.14374	0.316228
CHOLtu		1	1	1	0.987656	1	0.764569	0.680027	0.848627	0.598473	0.594647	0.909091	1	1	0.580073	0.909091	1	0.540185	0.879473	1	0.5		0	0	0	0.0328701	0	0.345435	0.358354	0.311613	0.350697	0.350265	0.28748	3.7901e-13	3.7901e-13	0.34635	0.28748	0	0.334068	0.293311	3.7901e-13	0.316228
CHSTEROLSULT		1	1	1	0.987656	1	0.764569	0.680027	0.848627	0.598473	0.594647	0.909091	0.954545	0.954545	0.580073	0.909091	1	0.540185	0.879473	0.954545	0.5		0	0	0	0.0328701	0	0.345435	0.358354	0.311613	0.350697	0.350265	0.28748	0.14374	0.14374	0.34635	0.28748	0	0.334068	0.293311	0.14374	0.316228
CHSTEROLt		1	1	1	0.987656	1	0.764569	0.680027	0.848627	0.598473	0.594647	0.909091	0.956559	0.956448	0.580073	0.909091	1	0.540185	0.879473	0.956554	0.5		0	0	0	0.0328701	0	0.345435	0.358354	0.311613	0.350697	0.350265	0.28748	0.137372	0.137722	0.34635	0.28748	0	0.334068	0.293311	0.137387	0.316228
CHSTEROLt1		1	1	1	0.987656	1	0.764569	0.680027	0.848627	0.598473	0.594647	0.909091	1	1	0.580073	0.909091	1	0.540185	0.879473	1	0.5		0	0	0	0.0328701	0	0.345435	0.358354	0.311613	0.350697	0.350265	0.28748	3.7901e-13	3.7901e-13	0.34635	0.28748	0	0.334068	0.293311	3.7901e-13	0.316228
CHSTEROLt2		1	1	1	0.987656	1	0.764569	0.680027	0.848627	0.598473	0.594647	0.909091	0.956559	0.956448	0.580073	0.909091	1	0.540185	0.879473	0.956554	0.5		0	0	0	0.0328701	0	0.345435	0.358354	0.311613	0.350697	0.350265	0.28748	0.137372	0.137722	0.34635	0.28748	0	0.334068	0.293311	0.137387	0.316228
CHSTEROLt3		1	1	1	0.987656	1	0.764569	0.680027	0.848627	0.598473	0.594647	0.909091	0.956559	0.956448	0.580073	0.909091	1	0.540185	0.879473	0.956554	0.5		0	0	0	0.0328701	0	0.345435	0.358354	0.311613	0.350697	0.350265	0.28748	0.137372	0.137722	0.34635	0.28748	0	0.334068	0.293311	0.137387	0.316228
CHSTEROLtg		1	1	1	0.987656	1	0.764569	0.680027	0.848627	0.598473	0.594647	0.909091	1	1	0.580073	0.909091	1	0.540185	0.879473	1	0.5		0	0	0	0.0328701	0	0.345435	0.358354	0.311613	0.350697	0.350265	0.28748	3.7901e-13	3.7901e-13	0.34635	0.28748	0	0.334068	0.293311	3.7901e-13	0.316228
CHTNASE		1	1	1	0.987656	1	0.764569	0.680027	0.848627	0.598473	0.594647	0.909091	1	1	0.580073	0.909091	1	0.540185	0.879473	1	0.5		0	0	0	0.0328701	0	0.345435	0.358354	0.311613	0.350697	0.350265	0.28748	3.7901e-13	3.7901e-13	0.34635	0.28748	0	0.334068	0.293311	3.7901e-13	0.316228
CHTNASEe		1	1	1	0.987656	1	0.764569	0.680027	0.848627	0.598473	0.594647	0.909091	1	1	0.580073	0.909091	1	0.540185	0.879473	1	0.5		0	0	0	0.0328701	0	0.345435	0.358354	0.311613	0.350697	0.350265	0.28748	3.7901e-13	3.7901e-13	0.34635	0.28748	0	0.334068	0.293311	3.7901e-13	0.316228
CITL		1	1	1	0.987656	1	0.764569	0.680027	0.848627	0.598473	0.594647	0.909091	0.954545	0.954545	0.580073	0.909091	1	0.540185	0.879473	0.954545	0.5		0	0	0	0.0328701	0	0.345435	0.358354	0.311613	0.350697	0.350265	0.28748	0.14374	0.14374	0.34635	0.28748	0	0.334068	0.293311	0.14374	0.316228
CITRtm		1	1	1	0.987656	1	0.764569	0.680027	0.848627	0.598473	0.594647	0.909091	1	1	0.580073	0.909091	1	0.540185	0.879473	1	0.5		0	0	0	0.0328701	0	0.345435	0.358354	0.311613	0.350697	0.350265	0.28748	3.7901e-13	3.7901e-13	0.34635	0.28748	0	0.334068	0.293311	3.7901e-13	0.316228
CITt4_2		1	1	1	0.987656	1	0.764569	0.680027	0.848627	0.598473	0.594647	0.909091	1	1	0.580073	0.909091	1	0.540185	0.879473	1	0.5		0	0	0	0.0328701	0	0.345435	0.358354	0.311613	0.350697	0.350265	0.28748	3.7901e-13	3.7901e-13	0.34635	0.28748	0	0.334068	0.293311	3.7901e-13	0.316228
CITt4_4		1	1	1	0.987656	1	0.764569	0.680027	0.848627	0.598473	0.594647	0.909091	1	1	0.580073	0.909091	1	0.540185	0.879473	1	0.5		0	0	0	0.0328701	0	0.345435	0.358354	0.311613	0.350697	0.350265	0.28748	3.7901e-13	3.7901e-13	0.34635	0.28748	0	0.334068	0.293311	3.7901e-13	0.316228
CITtam		1	1	1	0.987656	1	0.764569	0.680027	0.848627	0.598473	0.594647	0.909091	0.957507	0.957709	0.580073	0.909091	1	0.540185	0.879473	0.957507	0.5		0	0	0	0.0328701	0	0.345435	0.358354	0.311613	0.350697	0.350265	0.28748	0.134375	0.133737	0.34635	0.28748	0	0.334068	0.293311	0.134375	0.316228
CITtbm		1	1	1	0.987656	1	0.764569	0.680027	0.820227	0.598473	0.594647	0.909091	0.954545	0.954545	0.580073	0.909091	1	0.540185	0.878633	0.954545	0.5		0	0	0	0.0328701	0	0.345435	0.358354	0.319929	0.350697	0.350265	0.28748	0.14374	0.14374	0.34635	0.28748	0	0.334068	0.293911	0.14374	0.316228
CK		1	1	1	0.987656	1	0.764569	0.680027	0.848627	0.598473	0.594647	0.909091	1	1	0.580073	0.909091	1	0.540185	0.879473	1	0.5		0	0	0	0.0328701	0	0.345435	0.358354	0.311613	0.350697	0.350265	0.28748	3.7901e-13	3.7901e-13	0.34635	0.28748	0	0.334068	0.293311	3.7901e-13	0.316228
CKc		1	1	1	0.987656	1	0.764569	0.680027	0.848627	0.598473	0.594647	0.909091	1	1	0.580073	0.909091	1	0.540185	0.879473	1	0.5		0	0	0	0.0328701	0	0.345435	0.358354	0.311613	0.350697	0.350265	0.28748	3.7901e-13	3.7901e-13	0.34635	0.28748	0	0.334068	0.293311	3.7901e-13	0.316228
CLFORtex		1	1	1	0.987656	1	0.764569	0.680027	0.848627	0.598473	0.594647	0.909091	0.956115	0.956072	0.580073	0.909091	1	0.540185	0.879473	0.95611	0.5		0	0	0	0.0328701	0	0.345435	0.358354	0.311613	0.350697	0.350265	0.28748	0.138778	0.138912	0.34635	0.28748	0	0.334068	0.293311	0.138793	0.316228
CLFORtex2		1	1	1	0.987656	1	0.764569	0.680027	0.848627	0.598473	0.594647	0.909091	0.956115	0.956072	0.580073	0.909091	1	0.540185	0.879473	0.95611	0.5		0	0	0	0.0328701	0	0.345435	0.358354	0.311613	0.350697	0.350265	0.28748	0.138778	0.138912	0.34635	0.28748	0	0.334068	0.293311	0.138793	0.316228
CLHCO3tex2		1	1	1	0.987656	1	0.764569	0.680027	0.848627	0.598473	0.594647	0.909091	1	1	0.580073	0.909091	1	0.540185	0.879473	1	0.5		0	0	0	0.0328701	0	0.345435	0.358354	0.311613	0.350697	0.350265	0.28748	3.7901e-13	3.7901e-13	0.34635	0.28748	0	0.334068	0.293311	3.7901e-13	0.316228
CLHCOtex		1	1	1	0.987656	1	0.764569	0.680027	0.848627	0.598473	0.594647	0.909091	1	1	0.580073	0.909091	1	0.540185	0.879473	1	0.5		0	0	0	0.0328701	0	0.345435	0.358354	0.311613	0.350697	0.350265	0.28748	3.7901e-13	3.7901e-13	0.34635	0.28748	0	0.334068	0.293311	3.7901e-13	0.316228
CLI2tex		1	1	1	0.987656	1	0.764569	0.680027	0.848627	0.598473	0.594647	0.909091	1	1	0.580073	0.909091	1	0.540185	0.879473	1	0.5		0	0	0	0.0328701	0	0.345435	0.358354	0.311613	0.350697	0.350265	0.28748	3.7901e-13	3.7901e-13	0.34635	0.28748	0	0.334068	0.293311	3.7901e-13	0.316228
CLOHtex2		1	1	1	0.987656	1	0.764569	0.680027	0.848627	0.598473	0.594647	0.909091	1	1	0.580073	0.909091	1	0.540185	0.879473	1	0.5		0	0	0	0.0328701	0	0.345435	0.358354	0.311613	0.350697	0.350265	0.28748	3.7901e-13	3.7901e-13	0.34635	0.28748	0	0.334068	0.293311	3.7901e-13	0.316228
CLOXAtex2		1	1	1	0.987656	1	0.764569	0.680027	0.848627	0.598473	0.594647	0.909091	1	1	0.580073	0.909091	1	0.540185	0.879473	1	0.5		0	0	0	0.0328701	0	0.345435	0.358354	0.311613	0.350697	0.350265	0.28748	3.7901e-13	3.7901e-13	0.34635	0.28748	0	0.334068	0.293311	3.7901e-13	0.316228
CLPNDCOAtx		1	1	1	0.987656	1	0.764569	0.680027	0.848627	0.598473	0.594647	0.909091	1	1	0.580073	0.909091	1	0.540185	0.879473	1	0.5		0	0	0	0.0328701	0	0.345435	0.358354	0.311613	0.350697	0.350265	0.28748	3.7901e-13	3.7901e-13	0.34635	0.28748	0	0.334068	0.293311	3.7901e-13	0.316228
CLPNDCPT1		1	1	1	0.987656	1	0.764569	0.680027	0.848627	0.598473	0.594647	0.909091	1	1	0.580073	0.909091	1	0.540185	0.879473	1	0.5		0	0	0	0.0328701	0	0.345435	0.358354	0.311613	0.350697	0.350265	0.28748	3.7901e-13	3.7901e-13	0.34635	0.28748	0	0.334068	0.293311	3.7901e-13	0.316228
CLPNDCPT2		1	1	1	0.987656	1	0.764569	0.680027	0.848627	0.598473	0.594647	0.909091	1	1	0.580073	0.909091	1	0.540185	0.879473	1	0.5		0	0	0	0.0328701	0	0.345435	0.358354	0.311613	0.350697	0.350265	0.28748	3.7901e-13	3.7901e-13	0.34635	0.28748	0	0.334068	0.293311	3.7901e-13	0.316228
CLPNDCRNt		1	1	1	0.987656	1	0.764569	0.680027	0.848627	0.598473	0.594647	0.909091	1	1	0.580073	0.909091	1	0.540185	0.879473	1	0.5		0	0	0	0.0328701	0	0.345435	0.358354	0.311613	0.350697	0.350265	0.28748	3.7901e-13	3.7901e-13	0.34635	0.28748	0	0.334068	0.293311	3.7901e-13	0.316228
CLPNDt		1	1	1	0.987656	1	0.764569	0.680027	0.848627	0.598473	0.594647	0.909091	1	1	0.580073	0.909091	1	0.540185	0.879473	1	0.5		0	0	0	0.0328701	0	0.345435	0.358354	0.311613	0.350697	0.350265	0.28748	3.7901e-13	3.7901e-13	0.34635	0.28748	0	0.334068	0.293311	3.7901e-13	0.316228
CLS_hs		1	1	1	0.987656	1	0.764569	0.680027	0.848627	0.598473	0.594647	0.909091	1	1	0.580073	0.909091	1	0.540185	0.879473	1	0.5		0	0	0	0.0328701	0	0.345435	0.358354	0.311613	0.350697	0.350265	0.28748	3.7901e-13	3.7901e-13	0.34635	0.28748	0	0.334068	0.293311	3.7901e-13	0.316228
CMPACNAtg		1	1	1	0.987656	1	0.764569	0.680027	0.848627	0.598473	0.594647	0.909091	0.954699	0.954699	0.580073	0.909091	1	0.540185	0.879473	0.954699	0.5		0	0	0	0.0328701	0	0.345435	0.358354	0.311613	0.350697	0.350265	0.28748	0.143255	0.143255	0.34635	0.28748	0	0.334068	0.293311	0.143255	0.316228
CMPACNAtn		1	1	1	0.987656	1	0.764569	0.680027	0.848627	0.598473	0.594647	0.909091	0.954695	0.954695	0.580073	0.909091	1	0.540185	0.879473	0.954695	0.5		0	0	0	0.0328701	0	0.345435	0.358354	0.311613	0.350697	0.350265	0.28748	0.143268	0.143268	0.34635	0.28748	0	0.334068	0.293311	0.143268	0.316228
CMPSAS		1	1	1	0.987656	1	0.764569	0.680027	0.848627	0.598473	0.594647	0.909091	0.954699	0.954699	0.580073	0.909091	1	0.540185	0.879473	0.954699	0.5		0	0	0	0.0328701	0	0.345435	0.358354	0.311613	0.350697	0.350265	0.28748	0.143255	0.143255	0.34635	0.28748	0	0.334068	0.293311	0.143255	0.316228
CMPSASn		1	1	1	0.987656	1	0.764569	0.680027	0.848627	0.598473	0.594647	0.909091	0.954695	0.954695	0.580073	0.909091	1	0.540185	0.879473	0.954695	0.5		0	0	0	0.0328701	0	0.345435	0.358354	0.311613	0.350697	0.350265	0.28748	0.143268	0.143268	0.34635	0.28748	0	0.334068	0.293311	0.143268	0.316228
CO2t		1	1	1	0.987656	1	0.764569	0.680027	0.848627	0.598473	0.594647	0.90897	0.955885	0.954648	0.580073	0.909091	1	0.540185	0.879473	0.957292	0.5		0	0	0	0.0328701	0	0.345435	0.358354	0.311613	0.350697	0.350265	0.287442	0.139505	0.143415	0.34635	0.28748	0	0.334068	0.293311	0.135055	0.316228
CO2ter		1	1	1	0.987656	1	0.764569	0.680027	0.848627	0.598473	0.594647	0.909091	0.956574	0.956474	0.580073	0.909091	1	0.540185	0.879473	0.956569	0.5		0	0	0	0.0328701	0	0.345435	0.358354	0.311613	0.350697	0.350265	0.28748	0.137325	0.13764	0.34635	0.28748	0	0.334068	0.293311	0.13734	0.316228
CO2tg		1	1	1	0.987656	1	0.764569	0.680027	0.848627	0.598473	0.594647	0.909091	1	1	0.580073	0.909091	1	0.540185	0.879473	1	0.5		0	0	0	0.0328701	0	0.345435	0.358354	0.311613	0.350697	0.350265	0.28748	3.7901e-13	3.7901e-13	0.34635	0.28748	0	0.334068	0.293311	3.7901e-13	0.316228
CO2tm		1	1	1	0.987656	1	0.764569	0.680027	0.848627	0.598473	0.594647	0.909091	0.954667	0.954667	0.580073	0.909091	1	0.540185	0.879473	0.954667	0.5		0	0	0	0.0328701	0	0.345435	0.358354	0.311613	0.350697	0.350265	0.28748	0.143356	0.143356	0.34635	0.28748	0	0.334068	0.293311	0.143356	0.316228
CO2tn		1	1	1	0.987656	1	0.764569	0.680027	0.848627	0.598473	0.594647	0.909091	1	1	0.580073	0.909091	1	0.540185	0.879473	1	0.5		0	0	0	0.0328701	0	0.345435	0.358354	0.311613	0.350697	0.350265	0.28748	3.7901e-13	3.7901e-13	0.34635	0.28748	0	0.334068	0.293311	3.7901e-13	0.316228
CO2tp		1	1	1	0.987656	1	0.764569	0.680027	0.848627	0.598473	0.594647	0.909091	0.956574	0.956474	0.580073	0.909091	1	0.540185	0.879473	0.956569	0.5		0	0	0	0.0328701	0	0.345435	0.358354	0.311613	0.350697	0.350265	0.28748	0.137325	0.13764	0.34635	0.28748	0	0.334068	0.293311	0.13734	0.316228
COAtg		1	1	1	0.987656	1	0.764569	0.680027	0.848627	0.598473	0.594647	0.909091	1	1	0.580073	0.909091	1	0.540185	0.879473	1	0.5		0	0	0	0.0328701	0	0.345435	0.358354	0.311613	0.350697	0.350265	0.28748	3.7901e-13	3.7901e-13	0.34635	0.28748	0	0.334068	0.293311	3.7901e-13	0.316228
COAtl		1	1	1	0.987656	1	0.764569	0.680027	0.848627	0.598473	0.594647	0.909091	1	1	0.580073	0.909091	1	0.540185	0.879473	1	0.5		0	0	0	0.0328701	0	0.345435	0.358354	0.311613	0.350697	0.350265	0.28748	3.7901e-13	3.7901e-13	0.34635	0.28748	0	0.334068	0.293311	3.7901e-13	0.316228
COAtm		1	1	1	0.987656	1	0.764569	0.680027	0.848627	0.598473	0.594647	0.909091	0.954545	0.954545	0.580073	0.909091	1	0.540185	0.879473	0.954545	0.5		0	0	0	0.0328701	0	0.345435	0.358354	0.311613	0.350697	0.350265	0.28748	0.14374	0.14374	0.34635	0.28748	0	0.334068	0.293311	0.14374	0.316228
COAtn		1	1	1	0.987656	1	0.764569	0.680027	0.848627	0.598473	0.594647	0.909091	1	1	0.580073	0.909091	1	0.540185	0.879473	1	0.5		0	0	0	0.0328701	0	0.345435	0.358354	0.311613	0.350697	0.350265	0.28748	3.7901e-13	3.7901e-13	0.34635	0.28748	0	0.334068	0.293311	3.7901e-13	0.316228
COAtp		1	1	1	0.987656	1	0.764569	0.680027	0.848627	0.598473	0.594647	0.909091	0.959287	0.959769	0.580073	0.909091	1	0.540185	0.879473	0.959221	0.5		0	0	0	0.0328701	0	0.345435	0.358354	0.311613	0.350697	0.350265	0.28748	0.128746	0.12722	0.34635	0.28748	0	0.334068	0.293311	0.128953	0.316228
COAtr		1	1	1	0.987656	1	0.764569	0.680027	0.848627	0.598473	0.594647	0.909091	1	1	0.580073	0.909091	1	0.540185	0.879473	1	0.5		0	0	0	0.0328701	0	0.345435	0.358354	0.311613	0.350697	0.350265	0.28748	3.7901e-13	3.7901e-13	0.34635	0.28748	0	0.334068	0.293311	3.7901e-13	0.316228
COKECBESr		1	1	1	0.987656	1	0.764569	0.680027	0.848627	0.598473	0.594647	0.909091	1	1	0.580073	0.909091	1	0.540185	0.879473	1	0.5		0	0	0	0.0328701	0	0.345435	0.358354	0.311613	0.350697	0.350265	0.28748	3.7901e-13	3.7901e-13	0.34635	0.28748	0	0.334068	0.293311	3.7901e-13	0.316228
COQ3m		1	1	1	0.987656	1	0.764569	0.680027	0.848627	0.598473	0.594647	0.909091	1	1	0.580073	0.909091	1	0.540185	0.879473	1	0.5		0	0	0	0.0328701	0	0.345435	0.358354	0.311613	0.350697	0.350265	0.28748	3.7901e-13	3.7901e-13	0.34635	0.28748	0	0.334068	0.293311	3.7901e-13	0.316228
COQ5m		1	1	1	0.987656	1	0.764569	0.680027	0.848627	0.598473	0.594647	0.909091	1	1	0.580073	0.909091	1	0.540185	0.879473	1	0.5		0	0	0	0.0328701	0	0.345435	0.358354	0.311613	0.350697	0.350265	0.28748	3.7901e-13	3.7901e-13	0.34635	0.28748	0	0.334068	0.293311	3.7901e-13	0.316228
COQ6m		1	1	1	0.987656	1	0.764569	0.680027	0.848627	0.598473	0.594647	0.909091	1	1	0.580073	0.909091	1	0.540185	0.879473	1	0.5		0	0	0	0.0328701	0	0.345435	0.358354	0.311613	0.350697	0.350265	0.28748	3.7901e-13	3.7901e-13	0.34635	0.28748	0	0.334068	0.293311	3.7901e-13	0.316228
COQ7m		1	1	1	0.987656	1	0.764569	0.680027	0.848627	0.598473	0.594647	0.909091	1	1	0.580073	0.909091	1	0.540185	0.879473	1	0.5		0	0	0	0.0328701	0	0.345435	0.358354	0.311613	0.350697	0.350265	0.28748	3.7901e-13	3.7901e-13	0.34635	0.28748	0	0.334068	0.293311	3.7901e-13	0.316228
CORE2GTg		1	1	1	0.987656	1	0.764569	0.680027	0.848627	0.598473	0.594647	0.909091	0.954699	0.954699	0.580073	0.909091	1	0.540185	0.879473	0.954699	0.5		0	0	0	0.0328701	0	0.345435	0.358354	0.311613	0.350697	0.350265	0.28748	0.143255	0.143255	0.34635	0.28748	0	0.334068	0.293311	0.143255	0.316228
CORE6GTg		1	1	1	0.987656	1	0.764569	0.680027	0.848627	0.598473	0.594647	0.909091	1	1	0.580073	0.909091	1	0.540185	0.879473	1	0.5		0	0	0	0.0328701	0	0.345435	0.358354	0.311613	0.350697	0.350265	0.28748	3.7901e-13	3.7901e-13	0.34635	0.28748	0	0.334068	0.293311	3.7901e-13	0.316228
COUCOAFm		1	1	1	0.987656	1	0.764569	0.680027	0.848627	0.598473	0.594647	0.909091	1	1	0.580073	0.909091	1	0.540185	0.879473	1	0.5		0	0	0	0.0328701	0	0.345435	0.358354	0.311613	0.350697	0.350265	0.28748	3.7901e-13	3.7901e-13	0.34635	0.28748	0	0.334068	0.293311	3.7901e-13	0.316228
COUMARINte		1	1	1	0.987656	1	0.764569	0.680027	0.848627	0.598473	0.594647	0.909091	1	1	0.580073	0.909091	1	0.540185	0.879473	1	0.5		0	0	0	0.0328701	0	0.345435	0.358354	0.311613	0.350697	0.350265	0.28748	3.7901e-13	3.7901e-13	0.34635	0.28748	0	0.334068	0.293311	3.7901e-13	0.316228
COt		1	1	1	0.987656	1	0.764569	0.680027	0.848627	0.598473	0.594647	0.909091	1	1	0.580073	0.909091	1	0.540185	0.879473	1	0.5		0	0	0	0.0328701	0	0.345435	0.358354	0.311613	0.350697	0.350265	0.28748	3.7901e-13	3.7901e-13	0.34635	0.28748	0	0.334068	0.293311	3.7901e-13	0.316228
CPCTDTX		1	1	1	0.987656	1	0.764569	0.680027	0.848627	0.598473	0.594647	0.909091	1	1	0.580073	0.909091	1	0.540185	0.879473	1	0.5		0	0	0	0.0328701	0	0.345435	0.358354	0.311613	0.350697	0.350265	0.28748	3.7901e-13	3.7901e-13	0.34635	0.28748	0	0.334068	0.293311	3.7901e-13	0.316228
CPPPGO		1	1	1	0.987656	1	0.764569	0.680027	0.848627	0.598473	0.594647	0.909091	1	1	0.580073	0.909091	1	0.540185	0.879473	1	0.5		0	0	0	0.0328701	0	0.345435	0.358354	0.311613	0.350697	0.350265	0.28748	3.7901e-13	3.7901e-13	0.34635	0.28748	0	0.334068	0.293311	3.7901e-13	0.316228
CREATt4(2)r		1	1	1	0.987656	1	0.764569	0.680027	0.817652	0.595384	0.594647	0.909091	0.954545	0.954545	0.576078	0.909091	1	0.540185	0.877646	0.954545	0.5		0	0	0	0.0328701	0	0.345435	0.358354	0.320383	0.350345	0.350265	0.28748	0.14374	0.14374	0.345102	0.28748	0	0.334068	0.294644	0.14374	0.316228
CREATtmdiffir		1	1	1	0.987656	1	0.764569	0.680027	0.848627	0.598473	0.594647	0.909091	1	1	0.580073	0.909091	1	0.540185	0.879473	1	0.5		0	0	0	0.0328701	0	0.345435	0.358354	0.311613	0.350697	0.350265	0.28748	3.7901e-13	3.7901e-13	0.34635	0.28748	0	0.334068	0.293311	3.7901e-13	0.316228
CRMPte		1	1	1	0.987656	1	0.764569	0.680027	0.84814	0.598473	0.594647	0.909091	0.954545	0.973925	0.580073	0.909091	1	0.540185	0.879473	0.971685	0.5		0	0	0	0.0328701	0	0.345435	0.358354	0.31138	0.350697	0.350265	0.28748	0.14374	0.0824559	0.34635	0.28748	0	0.334068	0.293311	0.0895394	0.316228
CRNCAR3tp		1	1	1	0.987656	1	0.764569	0.680027	0.848627	0.598473	0.594647	0.909091	1	1	0.580073	0.909091	1	0.540185	0.879473	1	0.5		0	0	0	0.0328701	0	0.345435	0.358354	0.311613	0.350697	0.350265	0.28748	3.7901e-13	3.7901e-13	0.34635	0.28748	0	0.334068	0.293311	3.7901e-13	0.316228
CRNCARtp		1	1	1	0.987656	1	0.764569	0.680027	0.848627	0.598473	0.594647	0.909091	0.959287	0.959769	0.580073	0.909091	1	0.540185	0.879473	0.959221	0.5		0	0	0	0.0328701	0	0.345435	0.358354	0.311613	0.350697	0.350265	0.28748	0.128746	0.12722	0.34635	0.28748	0	0.334068	0.293311	0.128953	0.316228
CRNt		1	1	1	0.987656	1	0.764569	0.680027	0.848627	0.598473	0.594647	0.909091	1	1	0.580073	0.909091	1	0.540185	0.879473	1	0.5		0	0	0	0.0328701	0	0.345435	0.358354	0.311613	0.350697	0.350265	0.28748	3.7901e-13	3.7901e-13	0.34635	0.28748	0	0.334068	0.293311	3.7901e-13	0.316228
CRNtHa		1	1	1	0.987656	1	0.764569	0.680027	0.848627	0.598473	0.594647	0.909091	1	1	0.580073	0.909091	1	0.540185	0.879473	1	0.5		0	0	0	0.0328701	0	0.345435	0.358354	0.311613	0.350697	0.350265	0.28748	3.7901e-13	3.7901e-13	0.34635	0.28748	0	0.334068	0.293311	3.7901e-13	0.316228
CRNtim		1	1	1	0.987656	1	0.764569	0.680027	0.848627	0.598473	0.594647	0.909091	0.954545	0.954545	0.580073	0.909091	1	0.540185	0.879473	0.954545	0.5		0	0	0	0.0328701	0	0.345435	0.358354	0.311613	0.350697	0.350265	0.28748	0.14374	0.14374	0.34635	0.28748	0	0.334068	0.293311	0.14374	0.316228
CRNtuIR		1	1	1	0.987656	1	0.764569	0.680027	0.848627	0.598473	0.594647	0.909091	1	1	0.580073	0.909091	1	0.540185	0.879473	1	0.5		0	0	0	0.0328701	0	0.345435	0.358354	0.311613	0.350697	0.350265	0.28748	3.7901e-13	3.7901e-13	0.34635	0.28748	0	0.334068	0.293311	3.7901e-13	0.316228
CRNtuNa		1	1	1	0.987656	1	0.764569	0.680027	0.848627	0.598473	0.594647	0.909091	1	1	0.580073	0.909091	1	0.540185	0.879473	1	0.5		0	0	0	0.0328701	0	0.345435	0.358354	0.311613	0.350697	0.350265	0.28748	3.7901e-13	3.7901e-13	0.34635	0.28748	0	0.334068	0.293311	3.7901e-13	0.316228
CRNtx		1	1	1	0.987656	1	0.764569	0.680027	0.848627	0.598473	0.594647	0.909091	1	1	0.580073	0.909091	1	0.540185	0.879473	1	0.5		0	0	0	0.0328701	0	0.345435	0.358354	0.311613	0.350697	0.350265	0.28748	3.7901e-13	3.7901e-13	0.34635	0.28748	0	0.334068	0.293311	3.7901e-13	0.316228
CRTSLt		1	1	1	0.987656	1	0.764569	0.680027	0.848627	0.598473	0.594647	0.909091	1	1	0.580073	0.909091	1	0.540185	0.879473	1	0.5		0	0	0	0.0328701	0	0.345435	0.358354	0.311613	0.350697	0.350265	0.28748	3.7901e-13	3.7901e-13	0.34635	0.28748	0	0.334068	0.293311	3.7901e-13	0.316228
CRTSLtm		1	1	1	0.987656	1	0.764569	0.680027	0.848627	0.598473	0.594647	0.909091	1	1	0.580073	0.909091	1	0.540185	0.879473	1	0.5		0	0	0	0.0328701	0	0.345435	0.358354	0.311613	0.350697	0.350265	0.28748	3.7901e-13	3.7901e-13	0.34635	0.28748	0	0.334068	0.293311	3.7901e-13	0.316228
CRTSLtr		1	1	1	0.987656	1	0.764569	0.680027	0.848627	0.598473	0.594647	0.909091	1	1	0.580073	0.909091	1	0.540185	0.879473	1	0.5		0	0	0	0.0328701	0	0.345435	0.358354	0.311613	0.350697	0.350265	0.28748	3.7901e-13	3.7901e-13	0.34635	0.28748	0	0.334068	0.293311	3.7901e-13	0.316228
CRTSTRNt		1	1	1	0.987656	1	0.764569	0.680027	0.848627	0.598473	0.594647	0.909091	1	1	0.580073	0.909091	1	0.540185	0.879473	1	0.5		0	0	0	0.0328701	0	0.345435	0.358354	0.311613	0.350697	0.350265	0.28748	3.7901e-13	3.7901e-13	0.34635	0.28748	0	0.334068	0.293311	3.7901e-13	0.316228
CRTSTRNtm		1	1	1	0.987656	1	0.764569	0.680027	0.848627	0.598473	0.594647	0.909091	1	1	0.580073	0.909091	1	0.540185	0.879473	1	0.5		0	0	0	0.0328701	0	0.345435	0.358354	0.311613	0.350697	0.350265	0.28748	3.7901e-13	3.7901e-13	0.34635	0.28748	0	0.334068	0.293311	3.7901e-13	0.316228
CRTSTRNtr		1	1	1	0.987656	1	0.764569	0.680027	0.848627	0.598473	0.594647	0.909091	1	1	0.580073	0.909091	1	0.540185	0.879473	1	0.5		0	0	0	0.0328701	0	0.345435	0.358354	0.311613	0.350697	0.350265	0.28748	3.7901e-13	3.7901e-13	0.34635	0.28748	0	0.334068	0.293311	3.7901e-13	0.316228
CRVNCtr		1	1	1	0.987656	1	0.764569	0.680027	0.848627	0.598473	0.594647	0.909091	1	1	0.580073	0.909091	1	0.540185	0.879473	1	0.5		0	0	0	0.0328701	0	0.345435	0.358354	0.311613	0.350697	0.350265	0.28748	3.7901e-13	3.7901e-13	0.34635	0.28748	0	0.334068	0.293311	3.7901e-13	0.316228
CSNAT		1	1	1	0.987656	1	0.764569	0.680027	0.848627	0.598473	0.594647	0.909091	1	1	0.580073	0.909091	1	0.540185	0.879473	1	0.5		0	0	0	0.0328701	0	0.345435	0.358354	0.311613	0.350697	0.350265	0.28748	3.7901e-13	3.7901e-13	0.34635	0.28748	0	0.334068	0.293311	3.7901e-13	0.316228
CSNAT2m		1	1	1	0.987656	1	0.764569	0.680027	0.848627	0.598473	0.594647	0.909091	1	1	0.580073	0.909091	1	0.540185	0.879473	1	0.5		0	0	0	0.0328701	0	0.345435	0.358354	0.311613	0.350697	0.350265	0.28748	3.7901e-13	3.7901e-13	0.34635	0.28748	0	0.334068	0.293311	3.7901e-13	0.316228
CSNAT2x		1	1	1	0.987656	1	0.764569	0.680027	0.848627	0.598473	0.594647	0.909091	1	1	0.580073	0.909091	1	0.540185	0.879473	1	0.5		0	0	0	0.0328701	0	0.345435	0.358354	0.311613	0.350697	0.350265	0.28748	3.7901e-13	3.7901e-13	0.34635	0.28748	0	0.334068	0.293311	3.7901e-13	0.316228
CSNAT3x		1	1	1	0.987656	1	0.764569	0.680027	0.848627	0.598473	0.594647	0.909091	1	1	0.580073	0.909091	1	0.540185	0.879473	1	0.5		0	0	0	0.0328701	0	0.345435	0.358354	0.311613	0.350697	0.350265	0.28748	3.7901e-13	3.7901e-13	0.34635	0.28748	0	0.334068	0.293311	3.7901e-13	0.316228
CSNATer		1	1	1	0.987656	1	0.764569	0.680027	0.848627	0.598473	0.594647	0.909091	1	1	0.580073	0.909091	1	0.540185	0.879473	1	0.5		0	0	0	0.0328701	0	0.345435	0.358354	0.311613	0.350697	0.350265	0.28748	3.7901e-13	3.7901e-13	0.34635	0.28748	0	0.334068	0.293311	3.7901e-13	0.316228
CSNATm		1	1	1	0.987656	1	0.764569	0.680027	0.848627	0.598473	0.594647	0.909091	0.954545	0.954545	0.580073	0.909091	1	0.540185	0.879473	0.954545	0.5		0	0	0	0.0328701	0	0.345435	0.358354	0.311613	0.350697	0.350265	0.28748	0.14374	0.14374	0.34635	0.28748	0	0.334068	0.293311	0.14374	0.316228
CSNATp		1	1	1	0.987656	1	0.764569	0.680027	0.848627	0.598473	0.594647	0.909091	0.959287	0.959769	0.580073	0.909091	1	0.540185	0.879473	0.959221	0.5		0	0	0	0.0328701	0	0.345435	0.358354	0.311613	0.350697	0.350265	0.28748	0.128746	0.12722	0.34635	0.28748	0	0.334068	0.293311	0.128953	0.316228
CSNATr		1	1	1	0.987656	1	0.764569	0.680027	0.848627	0.598473	0.594647	0.909091	0.954545	0.954545	0.580073	0.909091	1	0.540185	0.879473	0.954545	0.5		0	0	0	0.0328701	0	0.345435	0.358354	0.311613	0.350697	0.350265	0.28748	0.14374	0.14374	0.34635	0.28748	0	0.334068	0.293311	0.14374	0.316228
CSNt		1	1	1	0.987656	1	0.764569	0.680027	0.848627	0.598473	0.594647	0.909091	1	1	0.580073	0.909091	1	0.540185	0.879473	1	0.5		0	0	0	0.0328701	0	0.345435	0.358354	0.311613	0.350697	0.350265	0.28748	3.7901e-13	3.7901e-13	0.34635	0.28748	0	0.334068	0.293311	3.7901e-13	0.316228
CSPG_At		1	1	1	0.987656	1	0.764569	0.680027	0.848627	0.598473	0.594647	0.909091	1	1	0.580073	0.909091	1	0.540185	0.879473	1	0.5		0	0	0	0.0328701	0	0.345435	0.358354	0.311613	0.350697	0.350265	0.28748	3.7901e-13	3.7901e-13	0.34635	0.28748	0	0.334068	0.293311	3.7901e-13	0.316228
CSPG_Atly		1	1	1	0.987656	1	0.764569	0.680027	0.848627	0.598473	0.594647	0.909091	1	1	0.580073	0.909091	1	0.540185	0.879473	1	0.5		0	0	0	0.0328701	0	0.345435	0.358354	0.311613	0.350697	0.350265	0.28748	3.7901e-13	3.7901e-13	0.34635	0.28748	0	0.334068	0.293311	3.7901e-13	0.316228
CSPG_Bt		1	1	1	0.987656	1	0.764569	0.680027	0.848627	0.598473	0.594647	0.909091	1	1	0.580073	0.909091	1	0.540185	0.879473	1	0.5		0	0	0	0.0328701	0	0.345435	0.358354	0.311613	0.350697	0.350265	0.28748	3.7901e-13	3.7901e-13	0.34635	0.28748	0	0.334068	0.293311	3.7901e-13	0.316228
CSPG_Btly		1	1	1	0.987656	1	0.764569	0.680027	0.848627	0.598473	0.594647	0.909091	1	1	0.580073	0.909091	1	0.540185	0.879473	1	0.5		0	0	0	0.0328701	0	0.345435	0.358354	0.311613	0.350697	0.350265	0.28748	3.7901e-13	3.7901e-13	0.34635	0.28748	0	0.334068	0.293311	3.7901e-13	0.316228
CSPG_Ct		1	1	1	0.987656	1	0.764569	0.680027	0.848627	0.598473	0.594647	0.909091	1	1	0.580073	0.909091	1	0.540185	0.879473	1	0.5		0	0	0	0.0328701	0	0.345435	0.358354	0.311613	0.350697	0.350265	0.28748	3.7901e-13	3.7901e-13	0.34635	0.28748	0	0.334068	0.293311	3.7901e-13	0.316228
CSPG_Ctly		1	1	1	0.987656	1	0.764569	0.680027	0.848627	0.598473	0.594647	0.909091	1	1	0.580073	0.909091	1	0.540185	0.879473	1	0.5		0	0	0	0.0328701	0	0.345435	0.358354	0.311613	0.350697	0.350265	0.28748	3.7901e-13	3.7901e-13	0.34635	0.28748	0	0.334068	0.293311	3.7901e-13	0.316228
CSPG_Dt		1	1	1	0.987656	1	0.764569	0.680027	0.848627	0.598473	0.594647	0.909091	1	1	0.580073	0.909091	1	0.540185	0.879473	1	0.5		0	0	0	0.0328701	0	0.345435	0.358354	0.311613	0.350697	0.350265	0.28748	3.7901e-13	3.7901e-13	0.34635	0.28748	0	0.334068	0.293311	3.7901e-13	0.316228
CSPG_Dtly		1	1	1	0.987656	1	0.764569	0.680027	0.848627	0.598473	0.594647	0.909091	1	1	0.580073	0.909091	1	0.540185	0.879473	1	0.5		0	0	0	0.0328701	0	0.345435	0.358354	0.311613	0.350697	0.350265	0.28748	3.7901e-13	3.7901e-13	0.34635	0.28748	0	0.334068	0.293311	3.7901e-13	0.316228
CSPG_Et		1	1	1	0.987656	1	0.764569	0.680027	0.848627	0.598473	0.594647	0.909091	1	1	0.580073	0.909091	1	0.540185	0.879473	1	0.5		0	0	0	0.0328701	0	0.345435	0.358354	0.311613	0.350697	0.350265	0.28748	3.7901e-13	3.7901e-13	0.34635	0.28748	0	0.334068	0.293311	3.7901e-13	0.316228
CSPG_Etly		1	1	1	0.987656	1	0.764569	0.680027	0.848627	0.598473	0.594647	0.909091	1	1	0.580073	0.909091	1	0.540185	0.879473	1	0.5		0	0	0	0.0328701	0	0.345435	0.358354	0.311613	0.350697	0.350265	0.28748	3.7901e-13	3.7901e-13	0.34635	0.28748	0	0.334068	0.293311	3.7901e-13	0.316228
CSm		1	1	1	0.987656	1	0.764569	0.680027	0.848627	0.598473	0.594647	0.909091	0.954545	0.954545	0.580073	0.909091	1	0.540185	0.879473	0.954545	0.5		0	0	0	0.0328701	0	0.345435	0.358354	0.311613	0.350697	0.350265	0.28748	0.14374	0.14374	0.34635	0.28748	0	0.334068	0.293311	0.14374	0.316228
CTPS1		0.736199	0.736199	0.783512	0.719879	0.736199	0.562817	0.490246	0.602771	0.422439	0.449047	0.724253	0.714727	0.714727	0.408136	0.669272	0.736199	0.407337	0.644407	0.714727	0.374563		1.65758e-15	0	0.0653493	0.033783	2.22725e-15	0.254316	0.262956	0.232706	0.251663	0.258959	0.23967	0.0679026	0.0679026	0.247316	0.211642	2.67314e-15	0.248695	0.218282	0.0679026	0.235565
CTPS2		1	1	1	0.987656	1	0.764569	0.680027	0.848627	0.598473	0.594647	0.909091	1	1	0.580073	0.909091	1	0.540185	0.879473	1	0.5		0	0	0	0.0328701	0	0.345435	0.358354	0.311613	0.350697	0.350265	0.28748	3.7901e-13	3.7901e-13	0.34635	0.28748	0	0.334068	0.293311	3.7901e-13	0.316228
CTPtn		1	1	1	0.987656	1	0.764569	0.680027	0.848627	0.598473	0.594647	0.909091	0.954695	0.954695	0.580073	0.909091	1	0.540185	0.879473	0.954695	0.5		0	0	0	0.0328701	0	0.345435	0.358354	0.311613	0.350697	0.350265	0.28748	0.143268	0.143268	0.34635	0.28748	0	0.334068	0.293311	0.143268	0.316228
CYANSTm		1	1	1	0.987656	1	0.764569	0.680027	0.848627	0.598473	0.594647	0.909091	1	1	0.580073	0.909091	1	0.540185	0.879473	1	0.5		0	0	0	0.0328701	0	0.345435	0.358354	0.311613	0.350697	0.350265	0.28748	3.7901e-13	3.7901e-13	0.34635	0.28748	0	0.334068	0.293311	3.7901e-13	0.316228
CYANt		1	1	1	0.987656	1	0.764569	0.680027	0.848627	0.598473	0.594647	0.909091	1	1	0.580073	0.909091	1	0.540185	0.879473	1	0.5		0	0	0	0.0328701	0	0.345435	0.358354	0.311613	0.350697	0.350265	0.28748	3.7901e-13	3.7901e-13	0.34635	0.28748	0	0.334068	0.293311	3.7901e-13	0.316228
CYANtm		1	1	1	0.987656	1	0.764569	0.680027	0.848627	0.598473	0.594647	0.909091	1	1	0.580073	0.909091	1	0.540185	0.879473	1	0.5		0	0	0	0.0328701	0	0.345435	0.358354	0.311613	0.350697	0.350265	0.28748	3.7901e-13	3.7901e-13	0.34635	0.28748	0	0.334068	0.293311	3.7901e-13	0.316228
CYOOm2		1	1	1	0.987656	1	0.764569	0.680027	0.848627	0.598473	0.594647	0.905467	0.954545	0.954545	0.580073	0.909091	1	0.540185	0.879473	0.954545	0.5		0	0	0	0.0328701	0	0.345435	0.358354	0.311613	0.350697	0.350265	0.286561	0.14374	0.14374	0.34635	0.28748	0	0.334068	0.293311	0.14374	0.316228
CYOOm3		1	1	1	0.987656	1	0.764569	0.680027	0.848627	0.598473	0.594647	0.909091	1	1	0.580073	0.909091	1	0.540185	0.879473	1	0.5		0	0	0	0.0328701	0	0.345435	0.358354	0.311613	0.350697	0.350265	0.28748	3.7901e-13	3.7901e-13	0.34635	0.28748	0	0.334068	0.293311	3.7901e-13	0.316228
CYOR-u10m		1	1	1	0.987656	1	0.744562	0.634804	0.786388	0.528917	0.577742	0.905467	0.954545	0.954545	0.494907	0.909091	1	0.516448	0.865658	0.954545	0.467292		0	0	0	0.0328701	0	0.358786	0.372043	0.331131	0.349137	0.357204	0.286561	0.14374	0.14374	0.326516	0.28748	0	0.339659	0.305961	0.14374	0.317855
CYSALANaEx		1	1	1	0.987656	1	0.764569	0.680027	0.848627	0.598473	0.594647	0.909091	1	1	0.580073	0.909091	1	0.540185	0.879473	1	0.5		0	0	0	0.0328701	0	0.345435	0.358354	0.311613	0.350697	0.350265	0.28748	3.7901e-13	3.7901e-13	0.34635	0.28748	0	0.334068	0.293311	3.7901e-13	0.316228
CYSAMO		0.933124	0.933124	0.975682	0.945098	0.933124	0.713331	0.615497	0.751556	0.525155	0.575543	0.890852	0.893749	0.893749	0.506598	0.848295	0.933124	0.521761	0.815045	0.893749	0.478414		6.35134e-16	0	0.0321703	0.0326296	0	0.322347	0.333016	0.298862	0.315508	0.329028	0.283224	0.124514	0.124514	0.309332	0.268254	2.505e-16	0.316864	0.278163	0.124514	0.300164
CYSASNNaEx		1	1	1	0.987656	1	0.764569	0.680027	0.848627	0.598473	0.594647	0.909091	1	1	0.580073	0.909091	1	0.540185	0.879473	1	0.5		0	0	0	0.0328701	0	0.345435	0.358354	0.311613	0.350697	0.350265	0.28748	3.7901e-13	3.7901e-13	0.34635	0.28748	0	0.334068	0.293311	3.7901e-13	0.316228
CYSGLNNaEx		1	1	1	0.987656	1	0.764569	0.680027	0.848627	0.598473	0.594647	0.909091	1	1	0.580073	0.909091	1	0.540185	0.879473	1	0.5		0	0	0	0.0328701	0	0.345435	0.358354	0.311613	0.350697	0.350265	0.28748	3.7901e-13	3.7901e-13	0.34635	0.28748	0	0.334068	0.293311	3.7901e-13	0.316228
CYSGLUexR		1	1	1	0.987656	1	0.764569	0.680027	0.848627	0.598473	0.594647	0.909091	1	1	0.580073	0.909091	1	0.540185	0.879473	1	0.5		0	0	0	0.0328701	0	0.345435	0.358354	0.311613	0.350697	0.350265	0.28748	3.7901e-13	3.7901e-13	0.34635	0.28748	0	0.334068	0.293311	3.7901e-13	0.316228
CYSGLYex		1	1	1	0.987656	1	0.764569	0.680027	0.848627	0.598473	0.594647	0.909091	1	1	0.580073	0.909091	1	0.540185	0.879473	1	0.5		0	0	0	0.0328701	0	0.345435	0.358354	0.311613	0.350697	0.350265	0.28748	3.7901e-13	3.7901e-13	0.34635	0.28748	0	0.334068	0.293311	3.7901e-13	0.316228
CYSGLYexR		1	1	1	0.987656	1	0.764569	0.680027	0.848627	0.598473	0.594647	0.909091	1	1	0.580073	0.909091	1	0.540185	0.879473	1	0.5		0	0	0	0.0328701	0	0.345435	0.358354	0.311613	0.350697	0.350265	0.28748	3.7901e-13	3.7901e-13	0.34635	0.28748	0	0.334068	0.293311	3.7901e-13	0.316228
CYSSERNaEx		1	1	1	0.987656	1	0.764569	0.680027	0.848627	0.598473	0.594647	0.909091	1	1	0.580073	0.909091	1	0.540185	0.879473	1	0.5		0	0	0	0.0328701	0	0.345435	0.358354	0.311613	0.350697	0.350265	0.28748	3.7901e-13	3.7901e-13	0.34635	0.28748	0	0.334068	0.293311	3.7901e-13	0.316228
CYSTA		0.933124	0.933124	0.969602	0.908343	0.933124	0.713331	0.615497	0.751556	0.525155	0.575543	0.890852	0.893749	0.893749	0.506598	0.848295	0.933124	0.521761	0.815045	0.893749	0.478414		0	0	0.0332994	0.0488598	0	0.322347	0.333016	0.298862	0.315508	0.329028	0.283224	0.124514	0.124514	0.309332	0.268254	0	0.316864	0.278163	0.124514	0.300164
CYSTAm		1	1	1	0.987656	1	0.764569	0.680027	0.848627	0.598473	0.594647	0.909091	1	1	0.580073	0.909091	1	0.540185	0.879473	1	0.5		0	0	0	0.0328701	0	0.345435	0.358354	0.311613	0.350697	0.350265	0.28748	3.7901e-13	3.7901e-13	0.34635	0.28748	0	0.334068	0.293311	3.7901e-13	0.316228
CYSTGL		0.854756	0.854756	0.803506	0.878493	0.854756	0.653433	0.565652	0.692346	0.484278	0.525203	0.717084	0.822506	0.822506	0.467415	0.777051	0.854756	0.476225	0.747138	0.822506	0.437086		1.11022e-16	1.11022e-16	0.0612973	0.0484044	1.11022e-16	0.295274	0.305121	0.272409	0.290086	0.301132	0.235456	0.101985	0.101985	0.284639	0.245725	1.11022e-16	0.28973	0.254322	0.101985	0.274454
CYSTGLUex		1	1	1	0.987656	1	0.764569	0.680027	0.848627	0.598473	0.594647	0.909091	1	1	0.580073	0.909091	1	0.540185	0.879473	1	0.5		0	0	0	0.0328701	0	0.345435	0.358354	0.311613	0.350697	0.350265	0.28748	3.7901e-13	3.7901e-13	0.34635	0.28748	0	0.334068	0.293311	3.7901e-13	0.316228
CYSTHRNaEx		1	1	1	0.987656	1	0.764569	0.680027	0.848627	0.598473	0.594647	0.909091	1	1	0.580073	0.909091	1	0.540185	0.879473	1	0.5		0	0	0	0.0328701	0	0.345435	0.358354	0.311613	0.350697	0.350265	0.28748	3.7901e-13	3.7901e-13	0.34635	0.28748	0	0.334068	0.293311	3.7901e-13	0.316228
CYSTS		0.854756	0.854756	0.803506	0.878493	0.854756	0.653433	0.565652	0.692346	0.484278	0.525203	0.717084	0.822506	0.822506	0.467415	0.777051	0.854756	0.476225	0.747138	0.822506	0.437086		1.11022e-16	1.11022e-16	0.0612973	0.0484044	1.11022e-16	0.295274	0.305121	0.272409	0.290086	0.301132	0.235456	0.101985	0.101985	0.284639	0.245725	1.11022e-16	0.28973	0.254322	0.101985	0.274454
CYSTSERex		1	1	1	0.987656	1	0.764569	0.680027	0.848627	0.598473	0.594647	0.909091	1	1	0.580073	0.909091	1	0.540185	0.879473	1	0.5		0	0	0	0.0328701	0	0.345435	0.358354	0.311613	0.350697	0.350265	0.28748	3.7901e-13	3.7901e-13	0.34635	0.28748	0	0.334068	0.293311	3.7901e-13	0.316228
CYSt4		1	1	1	0.987656	1	0.764569	0.680027	0.848627	0.598473	0.594647	0.909091	1	1	0.580073	0.909091	1	0.540185	0.879473	1	0.5		0	0	0	0.0328701	0	0.345435	0.358354	0.311613	0.350697	0.350265	0.28748	3.7901e-13	3.7901e-13	0.34635	0.28748	0	0.334068	0.293311	3.7901e-13	0.316228
CYStec		1	1	1	0.987656	1	0.764569	0.680027	0.848627	0.598473	0.594647	0.909091	1	1	0.580073	0.909091	1	0.540185	0.879473	1	0.5		0	0	0	0.0328701	0	0.345435	0.358354	0.311613	0.350697	0.350265	0.28748	3.7901e-13	3.7901e-13	0.34635	0.28748	0	0.334068	0.293311	3.7901e-13	0.316228
CYTD		1	1	1	0.987656	1	0.764569	0.680027	0.848627	0.598473	0.594647	0.909091	0.954545	0.954545	0.580073	0.909091	1	0.540185	0.879473	0.954545	0.5		0	0	0	0.0328701	0	0.345435	0.358354	0.311613	0.350697	0.350265	0.28748	0.14374	0.14374	0.34635	0.28748	0	0.334068	0.293311	0.14374	0.316228
CYTDK1		1	1	1	0.987656	1	0.764569	0.680027	0.848627	0.598473	0.594647	0.909091	0.954545	0.954545	0.580073	0.909091	1	0.540185	0.879473	0.954545	0.5		0	0	0	0.0328701	0	0.345435	0.358354	0.311613	0.350697	0.350265	0.28748	0.14374	0.14374	0.34635	0.28748	0	0.334068	0.293311	0.14374	0.316228
CYTDK2m		1	1	1	0.987634	1	0.764569	0.680027	0.848627	0.598473	0.594647	0.909091	0.954929	0.954929	0.580073	0.909091	1	0.540185	0.879473	0.954929	0.5		0	0	0	0.0329055	0	0.345435	0.358354	0.311613	0.350697	0.350265	0.28748	0.142528	0.142528	0.34635	0.28748	0	0.334068	0.293311	0.142528	0.316228
CYTDn		1	1	1	0.987656	1	0.764569	0.680027	0.848627	0.598473	0.594647	0.909091	0.954545	0.954545	0.580073	0.909091	1	0.540185	0.879473	0.954545	0.5		0	0	0	0.0328701	0	0.345435	0.358354	0.311613	0.350697	0.350265	0.28748	0.14374	0.14374	0.34635	0.28748	0	0.334068	0.293311	0.14374	0.316228
CYTDt		1	1	1	0.987656	1	0.764569	0.680027	0.848627	0.598473	0.594647	0.909091	1	1	0.580073	0.909091	1	0.540185	0.879473	1	0.5		0	0	0	0.0328701	0	0.345435	0.358354	0.311613	0.350697	0.350265	0.28748	3.7901e-13	3.7901e-13	0.34635	0.28748	0	0.334068	0.293311	3.7901e-13	0.316228
CYTDt4		1	1	1	0.987656	1	0.764569	0.680027	0.848627	0.598473	0.594647	0.909091	1	1	0.580073	0.909091	1	0.540185	0.879473	1	0.5		0	0	0	0.0328701	0	0.345435	0.358354	0.311613	0.350697	0.350265	0.28748	3.7901e-13	3.7901e-13	0.34635	0.28748	0	0.334068	0.293311	3.7901e-13	0.316228
CYTDt5		1	1	1	0.987656	1	0.764569	0.680027	0.848627	0.598473	0.594647	0.909091	1	1	0.580073	0.909091	1	0.540185	0.879473	1	0.5		0	0	0	0.0328701	0	0.345435	0.358354	0.311613	0.350697	0.350265	0.28748	3.7901e-13	3.7901e-13	0.34635	0.28748	0	0.334068	0.293311	3.7901e-13	0.316228
CYTDtl		1	1	1	0.987656	1	0.764569	0.680027	0.848627	0.598473	0.594647	0.909091	1	1	0.580073	0.909091	1	0.540185	0.879473	1	0.5		0	0	0	0.0328701	0	0.345435	0.358354	0.311613	0.350697	0.350265	0.28748	3.7901e-13	3.7901e-13	0.34635	0.28748	0	0.334068	0.293311	3.7901e-13	0.316228
CYTDtm		1	1	1	0.987634	1	0.764569	0.680027	0.848627	0.598473	0.594647	0.909091	0.954929	0.954929	0.580073	0.909091	1	0.540185	0.879473	0.954929	0.5		0	0	0	0.0329055	0	0.345435	0.358354	0.311613	0.350697	0.350265	0.28748	0.142528	0.142528	0.34635	0.28748	0	0.334068	0.293311	0.142528	0.316228
CYTDtn		1	1	1	0.987656	1	0.764569	0.680027	0.848627	0.598473	0.594647	0.909091	0.954545	0.954545	0.580073	0.909091	1	0.540185	0.879473	0.954545	0.5		0	0	0	0.0328701	0	0.345435	0.358354	0.311613	0.350697	0.350265	0.28748	0.14374	0.14374	0.34635	0.28748	0	0.334068	0.293311	0.14374	0.316228
CYTK1		1	1	1	0.987656	1	0.764569	0.680027	0.848627	0.598473	0.594647	0.909091	1	1	0.580073	0.909091	1	0.540185	0.879473	1	0.5		0	0	0	0.0328701	0	0.345435	0.358354	0.311613	0.350697	0.350265	0.28748	3.7901e-13	3.7901e-13	0.34635	0.28748	0	0.334068	0.293311	3.7901e-13	0.316228
CYTK10		1	1	1	0.987656	1	0.764569	0.680027	0.848627	0.598473	0.594647	0.909091	1	1	0.580073	0.909091	1	0.540185	0.879473	1	0.5		0	0	0	0.0328701	0	0.345435	0.358354	0.311613	0.350697	0.350265	0.28748	3.7901e-13	3.7901e-13	0.34635	0.28748	0	0.334068	0.293311	3.7901e-13	0.316228
CYTK10n		1	1	1	0.987656	1	0.764569	0.680027	0.848627	0.598473	0.594647	0.909091	1	1	0.580073	0.909091	1	0.540185	0.879473	1	0.5		0	0	0	0.0328701	0	0.345435	0.358354	0.311613	0.350697	0.350265	0.28748	3.7901e-13	3.7901e-13	0.34635	0.28748	0	0.334068	0.293311	3.7901e-13	0.316228
CYTK11		1	1	1	0.987656	1	0.764569	0.680027	0.848627	0.598473	0.594647	0.909091	1	1	0.580073	0.909091	1	0.540185	0.879473	1	0.5		0	0	0	0.0328701	0	0.345435	0.358354	0.311613	0.350697	0.350265	0.28748	3.7901e-13	3.7901e-13	0.34635	0.28748	0	0.334068	0.293311	3.7901e-13	0.316228
CYTK11n		1	1	1	0.987656	1	0.764569	0.680027	0.848627	0.598473	0.594647	0.909091	1	1	0.580073	0.909091	1	0.540185	0.879473	1	0.5		0	0	0	0.0328701	0	0.345435	0.358354	0.311613	0.350697	0.350265	0.28748	3.7901e-13	3.7901e-13	0.34635	0.28748	0	0.334068	0.293311	3.7901e-13	0.316228
CYTK12		1	1	1	0.987656	1	0.764569	0.680027	0.848627	0.598473	0.594647	0.909091	1	1	0.580073	0.909091	1	0.540185	0.879473	1	0.5		0	0	0	0.0328701	0	0.345435	0.358354	0.311613	0.350697	0.350265	0.28748	3.7901e-13	3.7901e-13	0.34635	0.28748	0	0.334068	0.293311	3.7901e-13	0.316228
CYTK12n		1	1	1	0.987656	1	0.764569	0.680027	0.848627	0.598473	0.594647	0.909091	1	1	0.580073	0.909091	1	0.540185	0.879473	1	0.5		0	0	0	0.0328701	0	0.345435	0.358354	0.311613	0.350697	0.350265	0.28748	3.7901e-13	3.7901e-13	0.34635	0.28748	0	0.334068	0.293311	3.7901e-13	0.316228
CYTK13		1	1	1	0.987656	1	0.764569	0.680027	0.848627	0.598473	0.594647	0.909091	1	1	0.580073	0.909091	1	0.540185	0.879473	1	0.5		0	0	0	0.0328701	0	0.345435	0.358354	0.311613	0.350697	0.350265	0.28748	3.7901e-13	3.7901e-13	0.34635	0.28748	0	0.334068	0.293311	3.7901e-13	0.316228
CYTK13n		1	1	1	0.987656	1	0.764569	0.680027	0.848627	0.598473	0.594647	0.909091	1	1	0.580073	0.909091	1	0.540185	0.879473	1	0.5		0	0	0	0.0328701	0	0.345435	0.358354	0.311613	0.350697	0.350265	0.28748	3.7901e-13	3.7901e-13	0.34635	0.28748	0	0.334068	0.293311	3.7901e-13	0.316228
CYTK14		1	1	1	0.987656	1	0.764569	0.680027	0.848627	0.598473	0.594647	0.909091	1	1	0.580073	0.909091	1	0.540185	0.879473	1	0.5		0	0	0	0.0328701	0	0.345435	0.358354	0.311613	0.350697	0.350265	0.28748	3.7901e-13	3.7901e-13	0.34635	0.28748	0	0.334068	0.293311	3.7901e-13	0.316228
CYTK14n		1	1	1	0.987656	1	0.764569	0.680027	0.848627	0.598473	0.594647	0.909091	1	1	0.580073	0.909091	1	0.540185	0.879473	1	0.5		0	0	0	0.0328701	0	0.345435	0.358354	0.311613	0.350697	0.350265	0.28748	3.7901e-13	3.7901e-13	0.34635	0.28748	0	0.334068	0.293311	3.7901e-13	0.316228
CYTK1m		1	1	1	0.987634	1	0.764569	0.680027	0.848627	0.598473	0.594647	0.909091	0.954929	0.954929	0.580073	0.909091	1	0.540185	0.879473	0.954929	0.5		0	0	0	0.0329055	0	0.345435	0.358354	0.311613	0.350697	0.350265	0.28748	0.142528	0.142528	0.34635	0.28748	0	0.334068	0.293311	0.142528	0.316228
CYTK1n		1	1	1	0.987656	1	0.764569	0.680027	0.848627	0.598473	0.594647	0.909091	1	1	0.580073	0.909091	1	0.540185	0.879473	1	0.5		0	0	0	0.0328701	0	0.345435	0.358354	0.311613	0.350697	0.350265	0.28748	3.7901e-13	3.7901e-13	0.34635	0.28748	0	0.334068	0.293311	3.7901e-13	0.316228
CYTK2		1	1	1	0.987656	1	0.764569	0.680027	0.848627	0.598473	0.594647	0.909091	1	1	0.580073	0.909091	1	0.540185	0.879473	1	0.5		0	0	0	0.0328701	0	0.345435	0.358354	0.311613	0.350697	0.350265	0.28748	3.7901e-13	3.7901e-13	0.34635	0.28748	0	0.334068	0.293311	3.7901e-13	0.316228
CYTK2n		1	1	1	0.987656	1	0.764569	0.680027	0.848627	0.598473	0.594647	0.909091	1	1	0.580073	0.909091	1	0.540185	0.879473	1	0.5		0	0	0	0.0328701	0	0.345435	0.358354	0.311613	0.350697	0.350265	0.28748	3.7901e-13	3.7901e-13	0.34635	0.28748	0	0.334068	0.293311	3.7901e-13	0.316228
CYTK3		1	1	1	0.987656	1	0.764569	0.680027	0.848627	0.598473	0.594647	0.909091	1	1	0.580073	0.909091	1	0.540185	0.879473	1	0.5		0	0	0	0.0328701	0	0.345435	0.358354	0.311613	0.350697	0.350265	0.28748	3.7901e-13	3.7901e-13	0.34635	0.28748	0	0.334068	0.293311	3.7901e-13	0.316228
CYTK3n		1	1	1	0.987656	1	0.764569	0.680027	0.848627	0.598473	0.594647	0.909091	1	1	0.580073	0.909091	1	0.540185	0.879473	1	0.5		0	0	0	0.0328701	0	0.345435	0.358354	0.311613	0.350697	0.350265	0.28748	3.7901e-13	3.7901e-13	0.34635	0.28748	0	0.334068	0.293311	3.7901e-13	0.316228
CYTK4		1	1	1	0.987656	1	0.764569	0.680027	0.848627	0.598473	0.594647	0.909091	1	1	0.580073	0.909091	1	0.540185	0.879473	1	0.5		0	0	0	0.0328701	0	0.345435	0.358354	0.311613	0.350697	0.350265	0.28748	3.7901e-13	3.7901e-13	0.34635	0.28748	0	0.334068	0.293311	3.7901e-13	0.316228
CYTK4n		1	1	1	0.987656	1	0.764569	0.680027	0.848627	0.598473	0.594647	0.909091	1	1	0.580073	0.909091	1	0.540185	0.879473	1	0.5		0	0	0	0.0328701	0	0.345435	0.358354	0.311613	0.350697	0.350265	0.28748	3.7901e-13	3.7901e-13	0.34635	0.28748	0	0.334068	0.293311	3.7901e-13	0.316228
CYTK5		1	1	1	0.987656	1	0.764569	0.680027	0.848627	0.598473	0.594647	0.909091	1	1	0.580073	0.909091	1	0.540185	0.879473	1	0.5		0	0	0	0.0328701	0	0.345435	0.358354	0.311613	0.350697	0.350265	0.28748	3.7901e-13	3.7901e-13	0.34635	0.28748	0	0.334068	0.293311	3.7901e-13	0.316228
CYTK5n		1	1	1	0.987656	1	0.764569	0.680027	0.848627	0.598473	0.594647	0.909091	1	1	0.580073	0.909091	1	0.540185	0.879473	1	0.5		0	0	0	0.0328701	0	0.345435	0.358354	0.311613	0.350697	0.350265	0.28748	3.7901e-13	3.7901e-13	0.34635	0.28748	0	0.334068	0.293311	3.7901e-13	0.316228
CYTK6		1	1	1	0.987656	1	0.764569	0.680027	0.848627	0.598473	0.594647	0.909091	1	1	0.580073	0.909091	1	0.540185	0.879473	1	0.5		0	0	0	0.0328701	0	0.345435	0.358354	0.311613	0.350697	0.350265	0.28748	3.7901e-13	3.7901e-13	0.34635	0.28748	0	0.334068	0.293311	3.7901e-13	0.316228
CYTK6n		1	1	1	0.987656	1	0.764569	0.680027	0.848627	0.598473	0.594647	0.909091	1	1	0.580073	0.909091	1	0.540185	0.879473	1	0.5		0	0	0	0.0328701	0	0.345435	0.358354	0.311613	0.350697	0.350265	0.28748	3.7901e-13	3.7901e-13	0.34635	0.28748	0	0.334068	0.293311	3.7901e-13	0.316228
CYTK7		1	1	1	0.987656	1	0.764569	0.680027	0.848627	0.598473	0.594647	0.909091	1	1	0.580073	0.909091	1	0.540185	0.879473	1	0.5		0	0	0	0.0328701	0	0.345435	0.358354	0.311613	0.350697	0.350265	0.28748	3.7901e-13	3.7901e-13	0.34635	0.28748	0	0.334068	0.293311	3.7901e-13	0.316228
CYTK7n		1	1	1	0.987656	1	0.764569	0.680027	0.848627	0.598473	0.594647	0.909091	1	1	0.580073	0.909091	1	0.540185	0.879473	1	0.5		0	0	0	0.0328701	0	0.345435	0.358354	0.311613	0.350697	0.350265	0.28748	3.7901e-13	3.7901e-13	0.34635	0.28748	0	0.334068	0.293311	3.7901e-13	0.316228
CYTK8		1	1	1	0.987656	1	0.764569	0.680027	0.848627	0.598473	0.594647	0.909091	1	1	0.580073	0.909091	1	0.540185	0.879473	1	0.5		0	0	0	0.0328701	0	0.345435	0.358354	0.311613	0.350697	0.350265	0.28748	3.7901e-13	3.7901e-13	0.34635	0.28748	0	0.334068	0.293311	3.7901e-13	0.316228
CYTK8n		1	1	1	0.987656	1	0.764569	0.680027	0.848627	0.598473	0.594647	0.909091	1	1	0.580073	0.909091	1	0.540185	0.879473	1	0.5		0	0	0	0.0328701	0	0.345435	0.358354	0.311613	0.350697	0.350265	0.28748	3.7901e-13	3.7901e-13	0.34635	0.28748	0	0.334068	0.293311	3.7901e-13	0.316228
CYTK9		1	1	1	0.987656	1	0.764569	0.680027	0.848627	0.598473	0.594647	0.909091	1	1	0.580073	0.909091	1	0.540185	0.879473	1	0.5		0	0	0	0.0328701	0	0.345435	0.358354	0.311613	0.350697	0.350265	0.28748	3.7901e-13	3.7901e-13	0.34635	0.28748	0	0.334068	0.293311	3.7901e-13	0.316228
CYTK9n		1	1	1	0.987656	1	0.764569	0.680027	0.848627	0.598473	0.594647	0.909091	1	1	0.580073	0.909091	1	0.540185	0.879473	1	0.5		0	0	0	0.0328701	0	0.345435	0.358354	0.311613	0.350697	0.350265	0.28748	3.7901e-13	3.7901e-13	0.34635	0.28748	0	0.334068	0.293311	3.7901e-13	0.316228
CytOxe-		1	1	1	0.987656	1	0.764569	0.680027	0.848627	0.598473	0.594647	0.909091	0.954545	0.954545	0.580073	0.909091	1	0.540185	0.879473	0.954545	0.5		0	0	0	0.0328701	0	0.345435	0.358354	0.311613	0.350697	0.350265	0.28748	0.14374	0.14374	0.34635	0.28748	0	0.334068	0.293311	0.14374	0.316228
D-LACt2		1	1	1	0.987656	1	0.764569	0.680027	0.848627	0.598473	0.594647	0.909091	0.956831	0.956785	0.580073	0.909091	1	0.540185	0.879473	0.956831	0.5		0	0	0	0.0328701	0	0.345435	0.358354	0.311613	0.350697	0.350265	0.28748	0.136512	0.136658	0.34635	0.28748	0	0.334068	0.293311	0.136512	0.316228
D-LACtm		1	1	1	0.987656	1	0.764569	0.680027	0.848627	0.598473	0.594647	0.909091	1	1	0.580073	0.909091	1	0.540185	0.879473	1	0.5		0	0	0	0.0328701	0	0.345435	0.358354	0.311613	0.350697	0.350265	0.28748	3.7901e-13	3.7901e-13	0.34635	0.28748	0	0.334068	0.293311	3.7901e-13	0.316228
DADA		1	1	1	0.987656	1	0.764569	0.680027	0.848627	0.598473	0.594647	0.909091	0.954785	0.954785	0.580073	0.909091	1	0.540185	0.879473	0.954785	0.5		0	0	0	0.0328701	0	0.345435	0.358354	0.311613	0.350697	0.350265	0.28748	0.142982	0.142982	0.34635	0.28748	0	0.334068	0.293311	0.142982	0.316228
DADAe		1	1	1	0.987656	1	0.764569	0.680027	0.848627	0.598473	0.594647	0.909091	0.954785	0.954785	0.580073	0.909091	1	0.540185	0.879473	0.954785	0.5		0	0	0	0.0328701	0	0.345435	0.358354	0.311613	0.350697	0.350265	0.28748	0.142982	0.142982	0.34635	0.28748	0	0.334068	0.293311	0.142982	0.316228
DADNK		1	1	1	0.987656	1	0.764569	0.680027	0.848627	0.598473	0.594647	0.909091	0.954545	0.954545	0.580073	0.909091	1	0.540185	0.879473	0.954545	0.5		0	0	0	0.0328701	0	0.345435	0.358354	0.311613	0.350697	0.350265	0.28748	0.14374	0.14374	0.34635	0.28748	0	0.334068	0.293311	0.14374	0.316228
DADNt4		1	1	1	0.987656	1	0.764569	0.680027	0.848627	0.598473	0.594647	0.909091	0.954785	0.954785	0.580073	0.909091	1	0.540185	0.879473	0.954785	0.5		0	0	0	0.0328701	0	0.345435	0.358354	0.311613	0.350697	0.350265	0.28748	0.142982	0.142982	0.34635	0.28748	0	0.334068	0.293311	0.142982	0.316228
DAGK_hs		1	1	1	0.987656	1	0.764569	0.680027	0.848627	0.598473	0.594647	0.909091	0.954545	0.954545	0.580073	0.909091	1	0.540185	0.879473	0.954545	0.5		0	0	0	0.0328701	0	0.345435	0.358354	0.311613	0.350697	0.350265	0.28748	0.14374	0.14374	0.34635	0.28748	0	0.334068	0.293311	0.14374	0.316228
DAGKn_hs		1	1	1	0.987656	1	0.764569	0.680027	0.848627	0.598473	0.594647	0.909091	1	1	0.580073	0.909091	1	0.540185	0.879473	1	0.5		0	0	0	0.0328701	0	0.345435	0.358354	0.311613	0.350697	0.350265	0.28748	3.7901e-13	3.7901e-13	0.34635	0.28748	0	0.334068	0.293311	3.7901e-13	0.316228
DAG_HSter		1	1	1	0.987656	1	0.764569	0.680027	0.848627	0.598473	0.594647	0.909091	1	1	0.580073	0.909091	1	0.540185	0.879473	1	0.5		0	0	0	0.0328701	0	0.345435	0.358354	0.311613	0.350697	0.350265	0.28748	3.7901e-13	3.7901e-13	0.34635	0.28748	0	0.334068	0.293311	3.7901e-13	0.316228
DAGt		1	1	1	0.987656	1	0.764569	0.680027	0.848627	0.598473	0.594647	0.909091	1	1	0.580073	0.909091	1	0.540185	0.879473	1	0.5		0	0	0	0.0328701	0	0.345435	0.358354	0.311613	0.350697	0.350265	0.28748	3.7901e-13	3.7901e-13	0.34635	0.28748	0	0.334068	0.293311	3.7901e-13	0.316228
DALAOXx		1	1	1	0.987656	1	0.764569	0.664845	0.808653	0.570985	0.594647	0.909091	0.954545	0.954545	0.552715	0.909091	1	0.540185	0.874195	0.954545	0.5		0	0	0	0.0328701	0	0.345435	0.357145	0.322497	0.342693	0.350265	0.28748	0.14374	0.14374	0.3384	0.28748	0	0.334068	0.297451	0.14374	0.316228
DALAt2r		1	1	1	0.987656	1	0.764569	0.680027	0.848627	0.598473	0.594647	0.909091	1	1	0.580073	0.909091	1	0.540185	0.879473	1	0.5		0	0	0	0.0328701	0	0.345435	0.358354	0.311613	0.350697	0.350265	0.28748	3.7901e-13	3.7901e-13	0.34635	0.28748	0	0.334068	0.293311	3.7901e-13	0.316228
DALAt2rL		1	1	1	0.987656	1	0.764569	0.680027	0.848627	0.598473	0.594647	0.909091	1	1	0.580073	0.909091	1	0.540185	0.879473	1	0.5		0	0	0	0.0328701	0	0.345435	0.358354	0.311613	0.350697	0.350265	0.28748	3.7901e-13	3.7901e-13	0.34635	0.28748	0	0.334068	0.293311	3.7901e-13	0.316228
DALAxt		1	1	1	0.987656	1	0.764569	0.664845	0.808653	0.570985	0.594647	0.909091	0.954545	0.954545	0.552715	0.909091	1	0.540185	0.874195	0.954545	0.5		0	0	0	0.0328701	0	0.345435	0.357145	0.322497	0.342693	0.350265	0.28748	0.14374	0.14374	0.3384	0.28748	0	0.334068	0.297451	0.14374	0.316228
DASCBH		1	1	1	0.987656	1	0.764569	0.680027	0.848627	0.598473	0.594647	0.909091	1	1	0.580073	0.909091	1	0.540185	0.879473	1	0.5		0	0	0	0.0328701	0	0.345435	0.358354	0.311613	0.350697	0.350265	0.28748	3.7901e-13	3.7901e-13	0.34635	0.28748	0	0.334068	0.293311	3.7901e-13	0.316228
DASCBR		1	1	1	0.987656	1	0.764569	0.680027	0.848627	0.598473	0.594647	0.909091	0.954545	0.954545	0.580073	0.909091	1	0.540185	0.879473	0.954545	0.5		0	0	0	0.0328701	0	0.345435	0.358354	0.311613	0.350697	0.350265	0.28748	0.14374	0.14374	0.34635	0.28748	0	0.334068	0.293311	0.14374	0.316228
DASPO1p		1	1	1	0.987656	1	0.764569	0.680027	0.848627	0.598473	0.594647	0.909091	1	1	0.580073	0.909091	1	0.540185	0.879473	1	0.5		0	0	0	0.0328701	0	0.345435	0.358354	0.311613	0.350697	0.350265	0.28748	3.7901e-13	3.7901e-13	0.34635	0.28748	0	0.334068	0.293311	3.7901e-13	0.316228
DATPtn		1	1	1	0.987656	1	0.764569	0.680027	0.815713	0.590283	0.594647	0.909091	0.954545	0.954545	0.571045	0.909091	1	0.540185	0.876902	0.954545	0.5		0	0	0	0.0328701	0	0.345435	0.358354	0.32077	0.348784	0.350265	0.28748	0.14374	0.14374	0.343571	0.28748	0	0.334068	0.295217	0.14374	0.316228
DCK1n		1	1	1	0.987656	1	0.764569	0.680027	0.848627	0.598473	0.594647	0.909091	1	1	0.580073	0.909091	1	0.540185	0.879473	1	0.5		0	0	0	0.0328701	0	0.345435	0.358354	0.311613	0.350697	0.350265	0.28748	3.7901e-13	3.7901e-13	0.34635	0.28748	0	0.334068	0.293311	3.7901e-13	0.316228
DCK2n		1	1	1	0.987656	1	0.764569	0.680027	0.848627	0.598473	0.594647	0.909091	1	1	0.580073	0.909091	1	0.540185	0.879473	1	0.5		0	0	0	0.0328701	0	0.345435	0.358354	0.311613	0.350697	0.350265	0.28748	3.7901e-13	3.7901e-13	0.34635	0.28748	0	0.334068	0.293311	3.7901e-13	0.316228
DCMPDA		1	1	1	0.987656	1	0.764569	0.680027	0.848627	0.598473	0.594647	0.909091	0.954545	0.954545	0.580073	0.909091	1	0.540185	0.879473	0.954545	0.5		0	0	0	0.0328701	0	0.345435	0.358354	0.311613	0.350697	0.350265	0.28748	0.14374	0.14374	0.34635	0.28748	0	0.334068	0.293311	0.14374	0.316228
DCSPTN1COAtx		1	1	1	0.987656	1	0.764569	0.680027	0.848627	0.598473	0.594647	0.909091	1	1	0.580073	0.909091	1	0.540185	0.879473	1	0.5		0	0	0	0.0328701	0	0.345435	0.358354	0.311613	0.350697	0.350265	0.28748	3.7901e-13	3.7901e-13	0.34635	0.28748	0	0.334068	0.293311	3.7901e-13	0.316228
DCSPTN1CPT1		1	1	1	0.987656	1	0.764569	0.680027	0.848627	0.598473	0.594647	0.909091	1	1	0.580073	0.909091	1	0.540185	0.879473	1	0.5		0	0	0	0.0328701	0	0.345435	0.358354	0.311613	0.350697	0.350265	0.28748	3.7901e-13	3.7901e-13	0.34635	0.28748	0	0.334068	0.293311	3.7901e-13	0.316228
DCSPTN1CPT2		1	1	1	0.987656	1	0.764569	0.680027	0.848627	0.598473	0.594647	0.909091	1	1	0.580073	0.909091	1	0.540185	0.879473	1	0.5		0	0	0	0.0328701	0	0.345435	0.358354	0.311613	0.350697	0.350265	0.28748	3.7901e-13	3.7901e-13	0.34635	0.28748	0	0.334068	0.293311	3.7901e-13	0.316228
DCSPTN1CRNt		1	1	1	0.987656	1	0.764569	0.680027	0.848627	0.598473	0.594647	0.909091	1	1	0.580073	0.909091	1	0.540185	0.879473	1	0.5		0	0	0	0.0328701	0	0.345435	0.358354	0.311613	0.350697	0.350265	0.28748	3.7901e-13	3.7901e-13	0.34635	0.28748	0	0.334068	0.293311	3.7901e-13	0.316228
DCSPTN1t		1	1	1	0.987656	1	0.764569	0.680027	0.848627	0.598473	0.594647	0.909091	1	1	0.580073	0.909091	1	0.540185	0.879473	1	0.5		0	0	0	0.0328701	0	0.345435	0.358354	0.311613	0.350697	0.350265	0.28748	3.7901e-13	3.7901e-13	0.34635	0.28748	0	0.334068	0.293311	3.7901e-13	0.316228
DCTPtn		1	1	1	0.987656	1	0.764569	0.680027	0.815713	0.590283	0.594647	0.909091	0.954545	0.954545	0.571045	0.909091	1	0.540185	0.876902	0.954545	0.5		0	0	0	0.0328701	0	0.345435	0.358354	0.32077	0.348784	0.350265	0.28748	0.14374	0.14374	0.343571	0.28748	0	0.334068	0.295217	0.14374	0.316228
DCYTD		1	1	1	0.987656	1	0.764569	0.680027	0.848627	0.598473	0.594647	0.909091	0.954545	0.954545	0.580073	0.909091	1	0.540185	0.879473	0.954545	0.5		0	0	0	0.0328701	0	0.345435	0.358354	0.311613	0.350697	0.350265	0.28748	0.14374	0.14374	0.34635	0.28748	0	0.334068	0.293311	0.14374	0.316228
DCYTt		1	1	1	0.987656	1	0.764569	0.680027	0.815713	0.590283	0.594647	0.909091	0.954545	0.954545	0.571045	0.909091	1	0.540185	0.876902	0.954545	0.5		0	0	0	0.0328701	0	0.345435	0.358354	0.32077	0.348784	0.350265	0.28748	0.14374	0.14374	0.343571	0.28748	0	0.334068	0.295217	0.14374	0.316228
DEBRISOQUINEt		1	1	1	0.987656	1	0.764569	0.680027	0.848627	0.598473	0.594647	0.909091	1	1	0.580073	0.909091	1	0.540185	0.879473	1	0.5		0	0	0	0.0328701	0	0.345435	0.358354	0.311613	0.350697	0.350265	0.28748	3.7901e-13	3.7901e-13	0.34635	0.28748	0	0.334068	0.293311	3.7901e-13	0.316228
DEDOLP1_L		1	1	1	0.987656	1	0.764569	0.680027	0.848627	0.598473	0.594647	0.909091	1	1	0.580073	0.909091	1	0.540185	0.879473	1	0.5		0	0	0	0.0328701	0	0.345435	0.358354	0.311613	0.350697	0.350265	0.28748	3.7901e-13	3.7901e-13	0.34635	0.28748	0	0.334068	0.293311	3.7901e-13	0.316228
DEDOLP1_U		1	1	1	0.987656	1	0.764569	0.680027	0.848627	0.598473	0.594647	0.909091	1	1	0.580073	0.909091	1	0.540185	0.879473	1	0.5		0	0	0	0.0328701	0	0.345435	0.358354	0.311613	0.350697	0.350265	0.28748	3.7901e-13	3.7901e-13	0.34635	0.28748	0	0.334068	0.293311	3.7901e-13	0.316228
DEDOLP2_L		1	1	1	0.987656	1	0.764569	0.680027	0.848627	0.598473	0.594647	0.909091	1	1	0.580073	0.909091	1	0.540185	0.879473	1	0.5		0	0	0	0.0328701	0	0.345435	0.358354	0.311613	0.350697	0.350265	0.28748	3.7901e-13	3.7901e-13	0.34635	0.28748	0	0.334068	0.293311	3.7901e-13	0.316228
DEDOLP2_U		1	1	1	0.987656	1	0.764569	0.680027	0.848627	0.598473	0.594647	0.909091	1	1	0.580073	0.909091	1	0.540185	0.879473	1	0.5		0	0	0	0.0328701	0	0.345435	0.358354	0.311613	0.350697	0.350265	0.28748	3.7901e-13	3.7901e-13	0.34635	0.28748	0	0.334068	0.293311	3.7901e-13	0.316228
DEDOLR_L		1	1	1	0.987656	1	0.764569	0.680027	0.848627	0.598473	0.594647	0.909091	1	1	0.580073	0.909091	1	0.540185	0.879473	1	0.5		0	0	0	0.0328701	0	0.345435	0.358354	0.311613	0.350697	0.350265	0.28748	3.7901e-13	3.7901e-13	0.34635	0.28748	0	0.334068	0.293311	3.7901e-13	0.316228
DEDOLR_U		1	1	1	0.987656	1	0.764569	0.680027	0.848627	0.598473	0.594647	0.909091	1	1	0.580073	0.909091	1	0.540185	0.879473	1	0.5		0	0	0	0.0328701	0	0.345435	0.358354	0.311613	0.350697	0.350265	0.28748	3.7901e-13	3.7901e-13	0.34635	0.28748	0	0.334068	0.293311	3.7901e-13	0.316228
DESAT16_2		1	1	1	0.987656	1	0.764569	0.680027	0.835602	0.598473	0.594647	0.909091	0.954545	0.954545	0.580073	0.909091	1	0.540185	0.879473	0.954545	0.5		0	0	0	0.0328701	0	0.345435	0.358354	0.317423	0.350697	0.350265	0.28748	0.14374	0.14374	0.34635	0.28748	0	0.334068	0.293311	0.14374	0.316228
DESAT18_10		1	1	1	0.987656	1	0.764569	0.680027	0.848627	0.598473	0.594647	0.909091	1	1	0.580073	0.909091	1	0.540185	0.879473	1	0.5		0	0	0	0.0328701	0	0.345435	0.358354	0.311613	0.350697	0.350265	0.28748	3.7901e-13	3.7901e-13	0.34635	0.28748	0	0.334068	0.293311	3.7901e-13	0.316228
DESAT18_3		1	1	1	0.987656	1	0.764569	0.680027	0.848627	0.598473	0.594647	0.909091	0.964421	0.965183	0.580073	0.909091	1	0.540185	0.879473	0.958366	0.5		0	0	0	0.0328701	0	0.345435	0.358354	0.311613	0.350697	0.350265	0.28748	0.11251	0.110101	0.34635	0.28748	0	0.334068	0.293311	0.13166	0.316228
DESAT18_4		1	1	1	0.987656	1	0.764569	0.680027	0.844333	0.598473	0.594647	0.909091	0.957249	0.980306	0.580073	0.909091	1	0.540185	0.879473	0.957977	0.5		0	0	0	0.0328701	0	0.345435	0.358354	0.317417	0.350697	0.350265	0.28748	0.135192	0.0622777	0.34635	0.28748	0	0.334068	0.293311	0.132888	0.316228
DESAT18_5		1	1	1	0.987656	1	0.764569	0.680027	0.844333	0.598473	0.594647	0.909091	0.957249	0.980306	0.580073	0.909091	1	0.540185	0.879473	0.957977	0.5		0	0	0	0.0328701	0	0.345435	0.358354	0.317417	0.350697	0.350265	0.28748	0.135192	0.0622777	0.34635	0.28748	0	0.334068	0.293311	0.132888	0.316228
DESAT18_6		1	1	1	0.987656	1	0.764569	0.680027	0.844483	0.598473	0.594647	0.909091	0.988893	0.993039	0.580073	0.909091	1	0.540185	0.879473	0.983447	0.5		0	0	0	0.0328701	0	0.345435	0.358354	0.317206	0.350697	0.350265	0.28748	0.0351224	0.0220129	0.34635	0.28748	0	0.334068	0.293311	0.0523454	0.316228
DESAT18_7		1	1	1	0.987656	1	0.764569	0.680027	0.844333	0.598473	0.594647	0.909091	0.98813	0.993039	0.580073	0.909091	1	0.540185	0.879473	0.978988	0.5		0	0	0	0.0328701	0	0.345435	0.358354	0.317417	0.350697	0.350265	0.28748	0.0375353	0.0220129	0.34635	0.28748	0	0.334068	0.293311	0.0664447	0.316228
DESAT18_8		1	1	1	0.987656	1	0.764569	0.680027	0.844333	0.598473	0.594647	0.909091	0.98813	0.993039	0.580073	0.909091	1	0.540185	0.879473	0.978988	0.5		0	0	0	0.0328701	0	0.345435	0.358354	0.317417	0.350697	0.350265	0.28748	0.0375353	0.0220129	0.34635	0.28748	0	0.334068	0.293311	0.0664447	0.316228
DESAT18_9		1	1	1	0.987656	1	0.764569	0.680027	0.848627	0.598473	0.594647	0.909091	1	1	0.580073	0.909091	1	0.540185	0.879473	1	0.5		0	0	0	0.0328701	0	0.345435	0.358354	0.311613	0.350697	0.350265	0.28748	3.7901e-13	3.7901e-13	0.34635	0.28748	0	0.334068	0.293311	3.7901e-13	0.316228
DESAT20_1		1	1	1	0.987656	1	0.764569	0.680027	0.848627	0.598473	0.594647	0.909091	1	1	0.580073	0.909091	1	0.540185	0.879473	1	0.5		0	0	0	0.0328701	0	0.345435	0.358354	0.311613	0.350697	0.350265	0.28748	3.7901e-13	3.7901e-13	0.34635	0.28748	0	0.334068	0.293311	3.7901e-13	0.316228
DESAT20_2		1	1	1	0.987656	1	0.764569	0.680027	0.848627	0.598473	0.594647	0.909091	1	1	0.580073	0.909091	1	0.540185	0.879473	1	0.5		0	0	0	0.0328701	0	0.345435	0.358354	0.311613	0.350697	0.350265	0.28748	3.7901e-13	3.7901e-13	0.34635	0.28748	0	0.334068	0.293311	3.7901e-13	0.316228
DESAT22_1p		1	1	1	0.987656	1	0.764569	0.680027	0.848627	0.598473	0.594647	0.909091	1	1	0.580073	0.909091	1	0.540185	0.879473	1	0.5		0	0	0	0.0328701	0	0.345435	0.358354	0.311613	0.350697	0.350265	0.28748	3.7901e-13	3.7901e-13	0.34635	0.28748	0	0.334068	0.293311	3.7901e-13	0.316228
DESAT22_2p		1	1	1	0.987656	1	0.764569	0.680027	0.848627	0.598473	0.594647	0.909091	1	1	0.580073	0.909091	1	0.540185	0.879473	1	0.5		0	0	0	0.0328701	0	0.345435	0.358354	0.311613	0.350697	0.350265	0.28748	3.7901e-13	3.7901e-13	0.34635	0.28748	0	0.334068	0.293311	3.7901e-13	0.316228
DESAT24_1		1	1	1	0.987656	1	0.764569	0.680027	0.848627	0.598473	0.594647	0.909091	1	1	0.580073	0.909091	1	0.540185	0.879473	1	0.5		0	0	0	0.0328701	0	0.345435	0.358354	0.311613	0.350697	0.350265	0.28748	3.7901e-13	3.7901e-13	0.34635	0.28748	0	0.334068	0.293311	3.7901e-13	0.316228
DGAT		1	1	1	0.987656	1	0.764569	0.680027	0.848627	0.598473	0.594647	0.909091	1	1	0.580073	0.909091	1	0.540185	0.879473	1	0.5		0	0	0	0.0328701	0	0.345435	0.358354	0.311613	0.350697	0.350265	0.28748	3.7901e-13	3.7901e-13	0.34635	0.28748	0	0.334068	0.293311	3.7901e-13	0.316228
DGCHOLte		1	1	1	0.987656	1	0.764569	0.680027	0.848627	0.598473	0.594647	0.909091	1	1	0.580073	0.909091	1	0.540185	0.879473	1	0.5		0	0	0	0.0328701	0	0.345435	0.358354	0.311613	0.350697	0.350265	0.28748	3.7901e-13	3.7901e-13	0.34635	0.28748	0	0.334068	0.293311	3.7901e-13	0.316228
DGK1		1	1	1	0.987656	1	0.764569	0.680027	0.848627	0.598473	0.594647	0.909091	0.955539	0.955724	0.580073	0.909091	1	0.540185	0.879473	0.955539	0.5		0	0	0	0.0328701	0	0.345435	0.358354	0.311613	0.350697	0.350265	0.28748	0.140597	0.140014	0.34635	0.28748	0	0.334068	0.293311	0.140597	0.316228
DGK2m		1	1	1	0.987656	1	0.764569	0.680027	0.82005	0.598473	0.594647	0.909091	0.959534	0.959534	0.580073	0.909091	1	0.540185	0.879473	0.959534	0.5		0	0	0	0.0328701	0	0.345435	0.358354	0.321693	0.350697	0.350265	0.28748	0.127965	0.127965	0.34635	0.28748	0	0.334068	0.293311	0.127965	0.316228
DGNSKm		1	1	1	0.987656	1	0.764569	0.680027	0.82005	0.598473	0.594647	0.909091	0.959534	0.959534	0.580073	0.909091	1	0.540185	0.879473	0.959534	0.5		0	0	0	0.0328701	0	0.345435	0.358354	0.321693	0.350697	0.350265	0.28748	0.127965	0.127965	0.34635	0.28748	0	0.334068	0.293311	0.127965	0.316228
DGSNt		1	1	1	0.987656	1	0.764569	0.680027	0.815713	0.590283	0.594647	0.909091	0.954545	0.954545	0.571045	0.909091	1	0.540185	0.876902	0.954545	0.5		0	0	0	0.0328701	0	0.345435	0.358354	0.32077	0.348784	0.350265	0.28748	0.14374	0.14374	0.343571	0.28748	0	0.334068	0.295217	0.14374	0.316228
DGSNtm		1	1	1	0.987656	1	0.764569	0.680027	0.82005	0.598473	0.594647	0.909091	0.959534	0.959534	0.580073	0.909091	1	0.540185	0.879473	0.959534	0.5		0	0	0	0.0328701	0	0.345435	0.358354	0.321693	0.350697	0.350265	0.28748	0.127965	0.127965	0.34635	0.28748	0	0.334068	0.293311	0.127965	0.316228
DGTPtn		1	1	1	0.987656	1	0.764569	0.680027	0.815713	0.590283	0.594647	0.909091	0.954545	0.954545	0.571045	0.909091	1	0.540185	0.876902	0.954545	0.5		0	0	0	0.0328701	0	0.345435	0.358354	0.32077	0.348784	0.350265	0.28748	0.14374	0.14374	0.343571	0.28748	0	0.334068	0.295217	0.14374	0.316228
DGULND		1	1	1	0.987656	1	0.764569	0.680027	0.848627	0.598473	0.594647	0.909091	0.954545	0.954545	0.580073	0.909091	1	0.540185	0.879473	0.954545	0.5		0	0	0	0.0328701	0	0.345435	0.358354	0.311613	0.350697	0.350265	0.28748	0.14374	0.14374	0.34635	0.28748	0	0.334068	0.293311	0.14374	0.316228
DHAAt1r		1	1	1	0.987656	1	0.764569	0.680027	0.848627	0.598473	0.594647	0.909091	1	1	0.580073	0.909091	1	0.540185	0.879473	1	0.5		0	0	0	0.0328701	0	0.345435	0.358354	0.311613	0.350697	0.350265	0.28748	3.7901e-13	3.7901e-13	0.34635	0.28748	0	0.334068	0.293311	3.7901e-13	0.316228
DHAPA		1	1	1	0.987656	1	0.764569	0.680027	0.848627	0.598473	0.594647	0.909091	1	1	0.580073	0.909091	1	0.540185	0.879473	1	0.5		0	0	0	0.0328701	0	0.345435	0.358354	0.311613	0.350697	0.350265	0.28748	3.7901e-13	3.7901e-13	0.34635	0.28748	0	0.334068	0.293311	3.7901e-13	0.316228
DHAPAx		1	1	1	0.987656	1	0.764569	0.680027	0.848627	0.598473	0.594647	0.909091	1	1	0.580073	0.909091	1	0.540185	0.879473	1	0.5		0	0	0	0.0328701	0	0.345435	0.358354	0.311613	0.350697	0.350265	0.28748	3.7901e-13	3.7901e-13	0.34635	0.28748	0	0.334068	0.293311	3.7901e-13	0.316228
DHCHOLESTANATEtm		1	1	1	0.987656	1	0.764569	0.680027	0.848627	0.598473	0.594647	0.909091	1	1	0.580073	0.909091	1	0.540185	0.879473	1	0.5		0	0	0	0.0328701	0	0.345435	0.358354	0.311613	0.350697	0.350265	0.28748	3.7901e-13	3.7901e-13	0.34635	0.28748	0	0.334068	0.293311	3.7901e-13	0.316228
DHCR241r		1	1	1	0.987656	1	0.764569	0.680027	0.848627	0.598473	0.594647	0.909091	0.956574	0.956474	0.580073	0.909091	1	0.540185	0.879473	0.956569	0.5		0	0	0	0.0328701	0	0.345435	0.358354	0.311613	0.350697	0.350265	0.28748	0.137325	0.13764	0.34635	0.28748	0	0.334068	0.293311	0.13734	0.316228
DHCR242r		1	1	1	0.987656	1	0.764569	0.680027	0.848627	0.598473	0.594647	0.909091	0.956574	0.956474	0.580073	0.909091	1	0.540185	0.879473	0.956569	0.5		0	0	0	0.0328701	0	0.345435	0.358354	0.311613	0.350697	0.350265	0.28748	0.137325	0.13764	0.34635	0.28748	0	0.334068	0.293311	0.13734	0.316228
DHCR243r		1	1	1	0.987656	1	0.764569	0.680027	0.848627	0.598473	0.594647	0.909091	0.956559	0.956448	0.580073	0.909091	1	0.540185	0.879473	0.956554	0.5		0	0	0	0.0328701	0	0.345435	0.358354	0.311613	0.350697	0.350265	0.28748	0.137372	0.137722	0.34635	0.28748	0	0.334068	0.293311	0.137387	0.316228
DHCR71r		1	1	1	0.987656	1	0.764569	0.680027	0.848627	0.598473	0.594647	0.909091	0.956559	0.956448	0.580073	0.909091	1	0.540185	0.879473	0.956554	0.5		0	0	0	0.0328701	0	0.345435	0.358354	0.311613	0.350697	0.350265	0.28748	0.137372	0.137722	0.34635	0.28748	0	0.334068	0.293311	0.137387	0.316228
DHCR72r		1	1	1	0.987656	1	0.764569	0.680027	0.848627	0.598473	0.594647	0.909091	0.956559	0.956448	0.580073	0.909091	1	0.540185	0.879473	0.956554	0.5		0	0	0	0.0328701	0	0.345435	0.358354	0.311613	0.350697	0.350265	0.28748	0.137372	0.137722	0.34635	0.28748	0	0.334068	0.293311	0.137387	0.316228
DHCRD1		1	1	1	0.987571	1	0.764569	0.680027	0.819412	0.598473	0.594647	0.909091	0.957331	0.957455	0.580073	0.909091	1	0.540185	0.879473	0.957455	0.5		0	0	0	0.0330071	0	0.345435	0.358354	0.321479	0.350697	0.350265	0.28748	0.134933	0.13454	0.34635	0.28748	0	0.334068	0.293311	0.13454	0.316228
DHCRD2		1	1	1	0.987571	1	0.764569	0.680027	0.848627	0.598473	0.594647	0.909091	0.954957	0.955087	0.580073	0.909091	1	0.540185	0.879473	0.955	0.5		0	0	0	0.0330071	0	0.345435	0.358354	0.311613	0.350697	0.350265	0.28748	0.14244	0.142026	0.34635	0.28748	0	0.334068	0.293311	0.142304	0.316228
DHDPBMTm		1	1	1	0.987656	1	0.764569	0.680027	0.848627	0.598473	0.594647	0.909091	1	1	0.580073	0.909091	1	0.540185	0.879473	1	0.5		0	0	0	0.0328701	0	0.345435	0.358354	0.311613	0.350697	0.350265	0.28748	3.7901e-13	3.7901e-13	0.34635	0.28748	0	0.334068	0.293311	3.7901e-13	0.316228
DHEASt		1	1	1	0.987656	1	0.764569	0.680027	0.848627	0.598473	0.594647	0.909091	1	1	0.580073	0.909091	1	0.540185	0.879473	1	0.5		0	0	0	0.0328701	0	0.345435	0.358354	0.311613	0.350697	0.350265	0.28748	3.7901e-13	3.7901e-13	0.34635	0.28748	0	0.334068	0.293311	3.7901e-13	0.316228
DHEAStr		1	1	1	0.987656	1	0.764569	0.680027	0.848627	0.598473	0.594647	0.909091	1	1	0.580073	0.909091	1	0.540185	0.879473	1	0.5		0	0	0	0.0328701	0	0.345435	0.358354	0.311613	0.350697	0.350265	0.28748	3.7901e-13	3.7901e-13	0.34635	0.28748	0	0.334068	0.293311	3.7901e-13	0.316228
DHEAtr		1	1	1	0.987656	1	0.764569	0.680027	0.848627	0.598473	0.594647	0.909091	1	1	0.580073	0.909091	1	0.540185	0.879473	1	0.5		0	0	0	0.0328701	0	0.345435	0.358354	0.311613	0.350697	0.350265	0.28748	3.7901e-13	3.7901e-13	0.34635	0.28748	0	0.334068	0.293311	3.7901e-13	0.316228
DHFR		1	1	1	0.98714	1	0.764569	0.679143	0.815268	0.589065	0.594647	0.909091	0.954545	0.954545	0.569888	0.909091	1	0.540185	0.876732	0.954545	0.5		0	0	0	0.0337123	0	0.345435	0.358261	0.320864	0.34838	0.350265	0.28748	0.14374	0.14374	0.343226	0.28748	0	0.334068	0.295351	0.14374	0.316228
DHFtl		1	1	1	0.987656	1	0.764569	0.680027	0.848627	0.598473	0.594647	0.909091	0.954545	0.954545	0.580073	0.909091	1	0.540185	0.879473	0.954545	0.5		0	0	0	0.0328701	0	0.345435	0.358354	0.311613	0.350697	0.350265	0.28748	0.14374	0.14374	0.34635	0.28748	0	0.334068	0.293311	0.14374	0.316228
DHFtm		1	1	1	0.987656	1	0.764569	0.680027	0.848627	0.598473	0.594647	0.909091	0.954545	0.954545	0.580073	0.909091	1	0.540185	0.879473	0.954545	0.5		0	0	0	0.0328701	0	0.345435	0.358354	0.311613	0.350697	0.350265	0.28748	0.14374	0.14374	0.34635	0.28748	0	0.334068	0.293311	0.14374	0.316228
DHORD9		0.848214	0.848214	0.797909	0.827081	0.848214	0.648432	0.561491	0.687403	0.480866	0.521	0.712242	0.816558	0.816558	0.464144	0.771104	0.848214	0.472423	0.74147	0.816558	0.433636		2.12108e-15	3.33067e-16	0.0601669	0.042333	3.83133e-16	0.293014	0.302794	0.270207	0.287965	0.298804	0.233668	0.100105	0.100105	0.282578	0.243844	9.90754e-16	0.287465	0.252333	0.100105	0.272308
DHORTS		0.848214	0.848214	0.797909	0.827081	0.848214	0.648432	0.561491	0.687403	0.480866	0.521	0.712242	0.816558	0.816558	0.464144	0.771104	0.848214	0.472423	0.74147	0.816558	0.433636		2.12108e-15	3.33067e-16	0.0601669	0.042333	3.83133e-16	0.293014	0.302794	0.270207	0.287965	0.298804	0.233668	0.100105	0.100105	0.282578	0.243844	9.90754e-16	0.287465	0.252333	0.100105	0.272308
DHPM1		1	1	1	0.987656	1	0.764569	0.680027	0.848627	0.598473	0.594647	0.909091	1	1	0.580073	0.909091	1	0.540185	0.879473	1	0.5		0	0	0	0.0328701	0	0.345435	0.358354	0.311613	0.350697	0.350265	0.28748	3.7901e-13	3.7901e-13	0.34635	0.28748	0	0.334068	0.293311	3.7901e-13	0.316228
DHPR		1	1	1	0.987656	1	0.764569	0.680027	0.837701	0.598473	0.594647	0.909091	0.954545	0.954545	0.580073	0.909091	1	0.540185	0.879473	0.954545	0.5		0	0	0	0.0328701	0	0.345435	0.358354	0.316308	0.350697	0.350265	0.28748	0.14374	0.14374	0.34635	0.28748	0	0.334068	0.293311	0.14374	0.316228
DHPR2		1	1	1	0.987656	1	0.764569	0.680027	0.837701	0.598473	0.594647	0.909091	0.954545	0.954545	0.580073	0.909091	1	0.540185	0.879473	0.954545	0.5		0	0	0	0.0328701	0	0.345435	0.358354	0.316308	0.350697	0.350265	0.28748	0.14374	0.14374	0.34635	0.28748	0	0.334068	0.293311	0.14374	0.316228
DIDPtn		1	1	1	0.987656	1	0.764569	0.680027	0.848627	0.598473	0.594647	0.909091	1	1	0.580073	0.909091	1	0.540185	0.879473	1	0.5		0	0	0	0.0328701	0	0.345435	0.358354	0.311613	0.350697	0.350265	0.28748	3.7901e-13	3.7901e-13	0.34635	0.28748	0	0.334068	0.293311	3.7901e-13	0.316228
DIGALSGALSIDEte		1	1	1	0.987656	1	0.764569	0.680027	0.848627	0.598473	0.594647	0.909091	1	1	0.580073	0.909091	1	0.540185	0.879473	1	0.5		0	0	0	0.0328701	0	0.345435	0.358354	0.311613	0.350697	0.350265	0.28748	3.7901e-13	3.7901e-13	0.34635	0.28748	0	0.334068	0.293311	3.7901e-13	0.316228
DIGALSIDEtl		1	1	1	0.987656	1	0.764569	0.680027	0.848627	0.598473	0.594647	0.909091	1	1	0.580073	0.909091	1	0.540185	0.879473	1	0.5		0	0	0	0.0328701	0	0.345435	0.358354	0.311613	0.350697	0.350265	0.28748	3.7901e-13	3.7901e-13	0.34635	0.28748	0	0.334068	0.293311	3.7901e-13	0.316228
DINt		1	1	1	0.987656	1	0.764569	0.680027	0.815713	0.590283	0.594647	0.909091	0.954545	0.954545	0.571045	0.909091	1	0.540185	0.876902	0.954545	0.5		0	0	0	0.0328701	0	0.345435	0.358354	0.32077	0.348784	0.350265	0.28748	0.14374	0.14374	0.343571	0.28748	0	0.334068	0.295217	0.14374	0.316228
DITPtn		1	1	1	0.987656	1	0.764569	0.680027	0.848627	0.598473	0.594647	0.909091	1	1	0.580073	0.909091	1	0.540185	0.879473	1	0.5		0	0	0	0.0328701	0	0.345435	0.358354	0.311613	0.350697	0.350265	0.28748	3.7901e-13	3.7901e-13	0.34635	0.28748	0	0.334068	0.293311	3.7901e-13	0.316228
DLNLCGCPT1		1	1	1	0.987656	1	0.764569	0.680027	0.848627	0.598473	0.594647	0.909091	1	1	0.580073	0.909091	1	0.540185	0.879473	1	0.5		0	0	0	0.0328701	0	0.345435	0.358354	0.311613	0.350697	0.350265	0.28748	3.7901e-13	3.7901e-13	0.34635	0.28748	0	0.334068	0.293311	3.7901e-13	0.316228
DLNLCGCPT2		1	1	1	0.987656	1	0.764569	0.680027	0.848627	0.598473	0.594647	0.909091	1	1	0.580073	0.909091	1	0.540185	0.879473	1	0.5		0	0	0	0.0328701	0	0.345435	0.358354	0.311613	0.350697	0.350265	0.28748	3.7901e-13	3.7901e-13	0.34635	0.28748	0	0.334068	0.293311	3.7901e-13	0.316228
DLNLCGCRNt		1	1	1	0.987656	1	0.764569	0.680027	0.848627	0.598473	0.594647	0.909091	1	1	0.580073	0.909091	1	0.540185	0.879473	1	0.5		0	0	0	0.0328701	0	0.345435	0.358354	0.311613	0.350697	0.350265	0.28748	3.7901e-13	3.7901e-13	0.34635	0.28748	0	0.334068	0.293311	3.7901e-13	0.316228
DLNLCGt		1	1	1	0.987656	1	0.764569	0.680027	0.848627	0.598473	0.594647	0.909091	1	1	0.580073	0.909091	1	0.540185	0.879473	1	0.5		0	0	0	0.0328701	0	0.345435	0.358354	0.311613	0.350697	0.350265	0.28748	3.7901e-13	3.7901e-13	0.34635	0.28748	0	0.334068	0.293311	3.7901e-13	0.316228
DMATT		1	1	1	0.987656	1	0.764569	0.680027	0.848627	0.598473	0.594647	0.909091	1	1	0.580073	0.909091	1	0.540185	0.879473	1	0.5		0	0	0	0.0328701	0	0.345435	0.358354	0.311613	0.350697	0.350265	0.28748	3.7901e-13	3.7901e-13	0.34635	0.28748	0	0.334068	0.293311	3.7901e-13	0.316228
DMATTx		1	1	1	0.987656	1	0.764569	0.680027	0.848627	0.598473	0.594647	0.909091	0.956574	0.956474	0.580073	0.909091	1	0.540185	0.879473	0.956569	0.5		0	0	0	0.0328701	0	0.345435	0.358354	0.311613	0.350697	0.350265	0.28748	0.137325	0.13764	0.34635	0.28748	0	0.334068	0.293311	0.13734	0.316228
DMHPTCRNCPT1		1	1	1	0.987656	1	0.764569	0.680027	0.848627	0.598473	0.594647	0.909091	1	1	0.580073	0.909091	1	0.540185	0.879473	1	0.5		0	0	0	0.0328701	0	0.345435	0.358354	0.311613	0.350697	0.350265	0.28748	3.7901e-13	3.7901e-13	0.34635	0.28748	0	0.334068	0.293311	3.7901e-13	0.316228
DMHPTCRNCPT2		1	1	1	0.987656	1	0.764569	0.680027	0.848627	0.598473	0.594647	0.909091	1	1	0.580073	0.909091	1	0.540185	0.879473	1	0.5		0	0	0	0.0328701	0	0.345435	0.358354	0.311613	0.350697	0.350265	0.28748	3.7901e-13	3.7901e-13	0.34635	0.28748	0	0.334068	0.293311	3.7901e-13	0.316228
DMHPTCRNt		1	1	1	0.987656	1	0.764569	0.680027	0.848627	0.598473	0.594647	0.909091	1	1	0.580073	0.909091	1	0.540185	0.879473	1	0.5		0	0	0	0.0328701	0	0.345435	0.358354	0.311613	0.350697	0.350265	0.28748	3.7901e-13	3.7901e-13	0.34635	0.28748	0	0.334068	0.293311	3.7901e-13	0.316228
DMHPTCRNte		1	1	1	0.987656	1	0.764569	0.680027	0.848627	0.598473	0.594647	0.909091	1	1	0.580073	0.909091	1	0.540185	0.879473	1	0.5		0	0	0	0.0328701	0	0.345435	0.358354	0.311613	0.350697	0.350265	0.28748	3.7901e-13	3.7901e-13	0.34635	0.28748	0	0.334068	0.293311	3.7901e-13	0.316228
DMNONCRNCPT2		1	1	1	0.987656	1	0.764569	0.680027	0.848627	0.598473	0.594647	0.909091	1	1	0.580073	0.909091	1	0.540185	0.879473	1	0.5		0	0	0	0.0328701	0	0.345435	0.358354	0.311613	0.350697	0.350265	0.28748	3.7901e-13	3.7901e-13	0.34635	0.28748	0	0.334068	0.293311	3.7901e-13	0.316228
DMNONCRNt		1	1	1	0.987656	1	0.764569	0.680027	0.848627	0.598473	0.594647	0.909091	1	1	0.580073	0.909091	1	0.540185	0.879473	1	0.5		0	0	0	0.0328701	0	0.345435	0.358354	0.311613	0.350697	0.350265	0.28748	3.7901e-13	3.7901e-13	0.34635	0.28748	0	0.334068	0.293311	3.7901e-13	0.316228
DM_13-cis-oretn(n)		1	1	1	0.987656	1	0.764569	0.680027	0.848627	0.598473	0.594647	0.909091	1	1	0.580073	0.909091	1	0.540185	0.879473	1	0.5		0	0	0	0.0328701	0	0.345435	0.358354	0.311613	0.350697	0.350265	0.28748	3.7901e-13	3.7901e-13	0.34635	0.28748	0	0.334068	0.293311	3.7901e-13	0.316228
DM_13-cis-retn(n)		1	1	1	0.987656	1	0.764569	0.680027	0.848627	0.598473	0.594647	0.909091	1	1	0.580073	0.909091	1	0.540185	0.879473	1	0.5		0	0	0	0.0328701	0	0.345435	0.358354	0.311613	0.350697	0.350265	0.28748	3.7901e-13	3.7901e-13	0.34635	0.28748	0	0.334068	0.293311	3.7901e-13	0.316228
DM_Asn-X-Ser/Thr(ly)		1	1	1	0.987656	1	0.764569	0.680027	0.848627	0.598473	0.594647	0.909091	1	1	0.580073	0.909091	1	0.540185	0.879473	1	0.5		0	0	0	0.0328701	0	0.345435	0.358354	0.311613	0.350697	0.350265	0.28748	3.7901e-13	3.7901e-13	0.34635	0.28748	0	0.334068	0.293311	3.7901e-13	0.316228
DM_Ser-Gly/Ala-X-Gly(ly)		1	1	1	0.987656	1	0.764569	0.680027	0.848627	0.598473	0.594647	0.909091	1	1	0.580073	0.909091	1	0.540185	0.879473	1	0.5		0	0	0	0.0328701	0	0.345435	0.358354	0.311613	0.350697	0.350265	0.28748	3.7901e-13	3.7901e-13	0.34635	0.28748	0	0.334068	0.293311	3.7901e-13	0.316228
DM_Ser/Thr(ly)		1	1	1	0.987656	1	0.764569	0.680027	0.848627	0.598473	0.594647	0.909091	1	1	0.580073	0.909091	1	0.540185	0.879473	1	0.5		0	0	0	0.0328701	0	0.345435	0.358354	0.311613	0.350697	0.350265	0.28748	3.7901e-13	3.7901e-13	0.34635	0.28748	0	0.334068	0.293311	3.7901e-13	0.316228
DM_T_antigen(g)		1	1	1	0.987656	1	0.764569	0.680027	0.848627	0.598473	0.594647	0.909091	1	1	0.580073	0.909091	1	0.540185	0.879473	1	0.5		0	0	0	0.0328701	0	0.345435	0.358354	0.311613	0.350697	0.350265	0.28748	3.7901e-13	3.7901e-13	0.34635	0.28748	0	0.334068	0.293311	3.7901e-13	0.316228
DM_atp(c)		1	1	1	0.987656	1	0.764569	0.680027	0.848627	0.598473	0.594647	0.909091	0.954545	0.954545	0.580073	0.909091	1	0.540185	0.879473	0.954545	0.5		0	0	0	0.0328701	0	0.345435	0.358354	0.311613	0.350697	0.350265	0.28748	0.14374	0.14374	0.34635	0.28748	0	0.334068	0.293311	0.14374	0.316228
DM_avite1(c)		1	1	1	0.987656	1	0.764569	0.680027	0.848627	0.598473	0.594647	0.909091	1	1	0.580073	0.909091	1	0.540185	0.879473	1	0.5		0	0	0	0.0328701	0	0.345435	0.358354	0.311613	0.350697	0.350265	0.28748	3.7901e-13	3.7901e-13	0.34635	0.28748	0	0.334068	0.293311	3.7901e-13	0.316228
DM_avite2(c)		1	1	1	0.987656	1	0.764569	0.680027	0.848627	0.598473	0.594647	0.909091	1	1	0.580073	0.909091	1	0.540185	0.879473	1	0.5		0	0	0	0.0328701	0	0.345435	0.358354	0.311613	0.350697	0.350265	0.28748	3.7901e-13	3.7901e-13	0.34635	0.28748	0	0.334068	0.293311	3.7901e-13	0.316228
DM_bvite(c)		1	1	1	0.987656	1	0.764569	0.680027	0.848627	0.598473	0.594647	0.909091	1	1	0.580073	0.909091	1	0.540185	0.879473	1	0.5		0	0	0	0.0328701	0	0.345435	0.358354	0.311613	0.350697	0.350265	0.28748	3.7901e-13	3.7901e-13	0.34635	0.28748	0	0.334068	0.293311	3.7901e-13	0.316228
DM_datp(m)		1	1	1	0.987656	1	0.764569	0.680027	0.815713	0.590283	0.594647	0.909091	0.954545	0.954545	0.571045	0.909091	1	0.540185	0.876902	0.954545	0.5		0	0	0	0.0328701	0	0.345435	0.358354	0.32077	0.348784	0.350265	0.28748	0.14374	0.14374	0.343571	0.28748	0	0.334068	0.295217	0.14374	0.316228
DM_datp(n)		1	1	1	0.987656	1	0.764569	0.680027	0.815713	0.590283	0.594647	0.909091	0.954545	0.954545	0.571045	0.909091	1	0.540185	0.876902	0.954545	0.5		0	0	0	0.0328701	0	0.345435	0.358354	0.32077	0.348784	0.350265	0.28748	0.14374	0.14374	0.343571	0.28748	0	0.334068	0.295217	0.14374	0.316228
DM_dctp(m)		1	1	1	0.987656	1	0.764569	0.680027	0.815713	0.590831	0.594647	0.909091	0.954545	0.954545	0.571045	0.909091	1	0.540185	0.876902	0.954545	0.5		0	0	0	0.0328701	0	0.345435	0.358354	0.32077	0.349415	0.350265	0.28748	0.14374	0.14374	0.343571	0.28748	0	0.334068	0.295217	0.14374	0.316228
DM_dctp(n)		1	1	1	0.987656	1	0.764569	0.680027	0.815713	0.590283	0.594647	0.909091	0.954545	0.954545	0.571045	0.909091	1	0.540185	0.876902	0.954545	0.5		0	0	0	0.0328701	0	0.345435	0.358354	0.32077	0.348784	0.350265	0.28748	0.14374	0.14374	0.343571	0.28748	0	0.334068	0.295217	0.14374	0.316228
DM_dgtp(m)		1	1	1	0.987656	1	0.764569	0.680027	0.815713	0.590283	0.594647	0.909091	0.954545	0.954545	0.571045	0.909091	1	0.540185	0.876902	0.954545	0.5		0	0	0	0.0328701	0	0.345435	0.358354	0.32077	0.348784	0.350265	0.28748	0.14374	0.14374	0.343571	0.28748	0	0.334068	0.295217	0.14374	0.316228
DM_dgtp(n)		1	1	1	0.987656	1	0.764569	0.680027	0.815713	0.590283	0.594647	0.909091	0.954545	0.954545	0.571045	0.909091	1	0.540185	0.876902	0.954545	0.5		0	0	0	0.0328701	0	0.345435	0.358354	0.32077	0.348784	0.350265	0.28748	0.14374	0.14374	0.343571	0.28748	0	0.334068	0.295217	0.14374	0.316228
DM_dsT_antigen(g)		1	1	1	0.987656	1	0.764569	0.680027	0.848627	0.598473	0.594647	0.909091	1	1	0.580073	0.909091	1	0.540185	0.879473	1	0.5		0	0	0	0.0328701	0	0.345435	0.358354	0.311613	0.350697	0.350265	0.28748	3.7901e-13	3.7901e-13	0.34635	0.28748	0	0.334068	0.293311	3.7901e-13	0.316228
DM_dttp(m)		1	1	1	0.987656	1	0.764569	0.680027	0.820081	0.598473	0.594647	0.909091	0.959534	0.959534	0.580073	0.909091	1	0.540185	0.879473	0.959534	0.5		0	0	0	0.0328701	0	0.345435	0.358354	0.321724	0.350697	0.350265	0.28748	0.127965	0.127965	0.34635	0.28748	0	0.334068	0.293311	0.127965	0.316228
DM_dttp(n)		1	1	1	0.987656	1	0.764569	0.680027	0.816536	0.598473	0.594647	0.909091	0.954976	0.954976	0.578872	0.909091	1	0.540185	0.879473	0.954976	0.5		0	0	0	0.0328701	0	0.345435	0.358354	0.321004	0.350697	0.350265	0.28748	0.142378	0.142378	0.347453	0.28748	0	0.334068	0.293311	0.142378	0.316228
DM_ethamp(r)		1	1	1	0.987656	1	0.764569	0.680027	0.819485	0.598473	0.594647	0.909091	0.957331	0.957455	0.580073	0.909091	1	0.540185	0.879473	0.957455	0.5		0	0	0	0.0328701	0	0.345435	0.358354	0.321468	0.350697	0.350265	0.28748	0.134933	0.13454	0.34635	0.28748	0	0.334068	0.293311	0.13454	0.316228
DM_gpi_sig(er)		1	1	1	0.987656	1	0.764569	0.680027	0.848627	0.598473	0.594647	0.909091	1	1	0.580073	0.909091	1	0.540185	0.879473	1	0.5		0	0	0	0.0328701	0	0.345435	0.358354	0.311613	0.350697	0.350265	0.28748	3.7901e-13	3.7901e-13	0.34635	0.28748	0	0.334068	0.293311	3.7901e-13	0.316228
DM_kdn(c)		1	1	1	0.987656	1	0.764569	0.680027	0.848627	0.598473	0.594647	0.909091	0.955628	0.955824	0.580073	0.909091	1	0.540185	0.879473	0.955628	0.5		0	0	0	0.0328701	0	0.345435	0.358354	0.311613	0.350697	0.350265	0.28748	0.140317	0.139697	0.34635	0.28748	0	0.334068	0.293311	0.140317	0.316228
DM_m(em)3gacpail_prot_hs(r)		1	1	1	0.987656	1	0.764569	0.680027	0.848627	0.598473	0.594647	0.909091	1	1	0.580073	0.909091	1	0.540185	0.879473	1	0.5		0	0	0	0.0328701	0	0.345435	0.358354	0.311613	0.350697	0.350265	0.28748	3.7901e-13	3.7901e-13	0.34635	0.28748	0	0.334068	0.293311	3.7901e-13	0.316228
DM_mem2emgacpail_prot_hs(r)		1	1	1	0.987656	1	0.764569	0.680027	0.848627	0.598473	0.594647	0.909091	1	1	0.580073	0.909091	1	0.540185	0.879473	1	0.5		0	0	0	0.0328701	0	0.345435	0.358354	0.311613	0.350697	0.350265	0.28748	3.7901e-13	3.7901e-13	0.34635	0.28748	0	0.334068	0.293311	3.7901e-13	0.316228
DM_n5m2masn(g)		1	1	1	0.987656	1	0.764569	0.680027	0.848627	0.598473	0.594647	0.909091	1	1	0.580073	0.909091	1	0.540185	0.879473	1	0.5		0	0	0	0.0328701	0	0.345435	0.358354	0.311613	0.350697	0.350265	0.28748	3.7901e-13	3.7901e-13	0.34635	0.28748	0	0.334068	0.293311	3.7901e-13	0.316228
DM_oretn(n)		1	1	1	0.987656	1	0.764569	0.680027	0.848627	0.598473	0.594647	0.909091	1	1	0.580073	0.909091	1	0.540185	0.879473	1	0.5		0	0	0	0.0328701	0	0.345435	0.358354	0.311613	0.350697	0.350265	0.28748	3.7901e-13	3.7901e-13	0.34635	0.28748	0	0.334068	0.293311	3.7901e-13	0.316228
DM_sTn_antigen(g)		1	1	1	0.987656	1	0.764569	0.680027	0.848627	0.598473	0.594647	0.909091	1	1	0.580073	0.909091	1	0.540185	0.879473	1	0.5		0	0	0	0.0328701	0	0.345435	0.358354	0.311613	0.350697	0.350265	0.28748	3.7901e-13	3.7901e-13	0.34635	0.28748	0	0.334068	0.293311	3.7901e-13	0.316228
DM_sprm(c)		1	1	1	0.987656	1	0.764569	0.680027	0.848627	0.598473	0.594647	0.909091	1	1	0.580073	0.909091	1	0.540185	0.879473	1	0.5		0	0	0	0.0328701	0	0.345435	0.358354	0.311613	0.350697	0.350265	0.28748	3.7901e-13	3.7901e-13	0.34635	0.28748	0	0.334068	0.293311	3.7901e-13	0.316228
DM_yvite(c)		1	1	1	0.987656	1	0.764569	0.680027	0.848627	0.598473	0.594647	0.909091	1	1	0.580073	0.909091	1	0.540185	0.879473	1	0.5		0	0	0	0.0328701	0	0.345435	0.358354	0.311613	0.350697	0.350265	0.28748	3.7901e-13	3.7901e-13	0.34635	0.28748	0	0.334068	0.293311	3.7901e-13	0.316228
DNADDP		1	1	1	0.987656	1	0.764569	0.680027	0.848627	0.598473	0.594647	0.909091	0.954545	0.954545	0.580073	0.909091	1	0.540185	0.879473	0.954545	0.5		0	0	0	0.0328701	0	0.345435	0.358354	0.311613	0.350697	0.350265	0.28748	0.14374	0.14374	0.34635	0.28748	0	0.334068	0.293311	0.14374	0.316228
DNADtn		1	1	1	0.987656	1	0.764569	0.680027	0.848627	0.598473	0.594647	0.909091	0.954545	0.954545	0.580073	0.909091	1	0.540185	0.879473	0.954545	0.5		0	0	0	0.0328701	0	0.345435	0.358354	0.311613	0.350697	0.350265	0.28748	0.14374	0.14374	0.34635	0.28748	0	0.334068	0.293311	0.14374	0.316228
DNAMTSEn		1	1	1	0.987656	1	0.764569	0.680027	0.848627	0.598473	0.594647	0.909091	1	1	0.580073	0.909091	1	0.540185	0.879473	1	0.5		0	0	0	0.0328701	0	0.345435	0.358354	0.311613	0.350697	0.350265	0.28748	3.7901e-13	3.7901e-13	0.34635	0.28748	0	0.334068	0.293311	3.7901e-13	0.316228
DNAMTn		1	1	1	0.987656	1	0.764569	0.680027	0.848627	0.598473	0.594647	0.909091	1	1	0.580073	0.909091	1	0.540185	0.879473	1	0.5		0	0	0	0.0328701	0	0.345435	0.358354	0.311613	0.350697	0.350265	0.28748	3.7901e-13	3.7901e-13	0.34635	0.28748	0	0.334068	0.293311	3.7901e-13	0.316228
DNDPt10m		1	1	1	0.987656	1	0.764569	0.680027	0.848627	0.598473	0.594647	0.909091	1	1	0.580073	0.909091	1	0.540185	0.879473	1	0.5		0	0	0	0.0328701	0	0.345435	0.358354	0.311613	0.350697	0.350265	0.28748	3.7901e-13	3.7901e-13	0.34635	0.28748	0	0.334068	0.293311	3.7901e-13	0.316228
DNDPt11m		1	1	1	0.987656	1	0.764569	0.680027	0.848627	0.598473	0.594647	0.909091	1	1	0.580073	0.909091	1	0.540185	0.879473	1	0.5		0	0	0	0.0328701	0	0.345435	0.358354	0.311613	0.350697	0.350265	0.28748	3.7901e-13	3.7901e-13	0.34635	0.28748	0	0.334068	0.293311	3.7901e-13	0.316228
DNDPt12m		1	1	1	0.987656	1	0.764569	0.680027	0.819951	0.598473	0.594647	0.909091	0.959534	0.959534	0.580073	0.909091	1	0.540185	0.879473	0.959534	0.5		0	0	0	0.0328701	0	0.345435	0.358354	0.321675	0.350697	0.350265	0.28748	0.127965	0.127965	0.34635	0.28748	0	0.334068	0.293311	0.127965	0.316228
DNDPt13m		1	1	1	0.987656	1	0.764569	0.680027	0.819951	0.598473	0.594647	0.909091	0.959534	0.959534	0.580073	0.909091	1	0.540185	0.879473	0.959534	0.5		0	0	0	0.0328701	0	0.345435	0.358354	0.321675	0.350697	0.350265	0.28748	0.127965	0.127965	0.34635	0.28748	0	0.334068	0.293311	0.127965	0.316228
DNDPt14m		1	1	1	0.987656	1	0.764569	0.680027	0.848627	0.598473	0.594647	0.909091	1	1	0.580073	0.909091	1	0.540185	0.879473	1	0.5		0	0	0	0.0328701	0	0.345435	0.358354	0.311613	0.350697	0.350265	0.28748	3.7901e-13	3.7901e-13	0.34635	0.28748	0	0.334068	0.293311	3.7901e-13	0.316228
DNDPt15m		1	1	1	0.987656	1	0.764569	0.680027	0.848627	0.598473	0.594647	0.909091	1	1	0.580073	0.909091	1	0.540185	0.879473	1	0.5		0	0	0	0.0328701	0	0.345435	0.358354	0.311613	0.350697	0.350265	0.28748	3.7901e-13	3.7901e-13	0.34635	0.28748	0	0.334068	0.293311	3.7901e-13	0.316228
DNDPt16m		1	1	1	0.987656	1	0.764569	0.680027	0.848627	0.598473	0.594647	0.909091	1	1	0.580073	0.909091	1	0.540185	0.879473	1	0.5		0	0	0	0.0328701	0	0.345435	0.358354	0.311613	0.350697	0.350265	0.28748	3.7901e-13	3.7901e-13	0.34635	0.28748	0	0.334068	0.293311	3.7901e-13	0.316228
DNDPt17m		1	1	1	0.987656	1	0.764569	0.680027	0.848627	0.598473	0.594647	0.909091	1	1	0.580073	0.909091	1	0.540185	0.879473	1	0.5		0	0	0	0.0328701	0	0.345435	0.358354	0.311613	0.350697	0.350265	0.28748	3.7901e-13	3.7901e-13	0.34635	0.28748	0	0.334068	0.293311	3.7901e-13	0.316228
DNDPt18m		1	1	1	0.987656	1	0.764569	0.680027	0.819951	0.598473	0.594647	0.909091	0.959534	0.959534	0.580073	0.909091	1	0.540185	0.879473	0.959534	0.5		0	0	0	0.0328701	0	0.345435	0.358354	0.321675	0.350697	0.350265	0.28748	0.127965	0.127965	0.34635	0.28748	0	0.334068	0.293311	0.127965	0.316228
DNDPt19m		1	1	1	0.987656	1	0.764569	0.680027	0.819951	0.598473	0.594647	0.909091	0.959534	0.959534	0.580073	0.909091	1	0.540185	0.879473	0.959534	0.5		0	0	0	0.0328701	0	0.345435	0.358354	0.321675	0.350697	0.350265	0.28748	0.127965	0.127965	0.34635	0.28748	0	0.334068	0.293311	0.127965	0.316228
DNDPt1m		1	1	1	0.987656	1	0.764569	0.680027	0.819951	0.598473	0.594647	0.909091	0.959534	0.959534	0.580073	0.909091	1	0.540185	0.879473	0.959534	0.5		0	0	0	0.0328701	0	0.345435	0.358354	0.321675	0.350697	0.350265	0.28748	0.127965	0.127965	0.34635	0.28748	0	0.334068	0.293311	0.127965	0.316228
DNDPt20m		1	1	1	0.987656	1	0.764569	0.680027	0.819951	0.598473	0.594647	0.909091	0.959534	0.959534	0.580073	0.909091	1	0.540185	0.879473	0.959534	0.5		0	0	0	0.0328701	0	0.345435	0.358354	0.321675	0.350697	0.350265	0.28748	0.127965	0.127965	0.34635	0.28748	0	0.334068	0.293311	0.127965	0.316228
DNDPt21m		1	1	1	0.987656	1	0.764569	0.680027	0.819951	0.598473	0.594647	0.909091	0.959534	0.959534	0.580073	0.909091	1	0.540185	0.879473	0.959534	0.5		0	0	0	0.0328701	0	0.345435	0.358354	0.321675	0.350697	0.350265	0.28748	0.127965	0.127965	0.34635	0.28748	0	0.334068	0.293311	0.127965	0.316228
DNDPt22m		1	1	1	0.987656	1	0.764569	0.680027	0.848627	0.598473	0.594647	0.909091	1	1	0.580073	0.909091	1	0.540185	0.879473	1	0.5		0	0	0	0.0328701	0	0.345435	0.358354	0.311613	0.350697	0.350265	0.28748	3.7901e-13	3.7901e-13	0.34635	0.28748	0	0.334068	0.293311	3.7901e-13	0.316228
DNDPt23m		1	1	1	0.987656	1	0.764569	0.680027	0.848627	0.598473	0.594647	0.909091	1	1	0.580073	0.909091	1	0.540185	0.879473	1	0.5		0	0	0	0.0328701	0	0.345435	0.358354	0.311613	0.350697	0.350265	0.28748	3.7901e-13	3.7901e-13	0.34635	0.28748	0	0.334068	0.293311	3.7901e-13	0.316228
DNDPt24m		1	1	1	0.987656	1	0.764569	0.680027	0.848627	0.598473	0.594647	0.909091	1	1	0.580073	0.909091	1	0.540185	0.879473	1	0.5		0	0	0	0.0328701	0	0.345435	0.358354	0.311613	0.350697	0.350265	0.28748	3.7901e-13	3.7901e-13	0.34635	0.28748	0	0.334068	0.293311	3.7901e-13	0.316228
DNDPt25m		1	1	1	0.987656	1	0.764569	0.680027	0.848627	0.598473	0.594647	0.909091	1	1	0.580073	0.909091	1	0.540185	0.879473	1	0.5		0	0	0	0.0328701	0	0.345435	0.358354	0.311613	0.350697	0.350265	0.28748	3.7901e-13	3.7901e-13	0.34635	0.28748	0	0.334068	0.293311	3.7901e-13	0.316228
DNDPt26m		1	1	1	0.987656	1	0.764569	0.680027	0.848627	0.598473	0.594647	0.909091	1	1	0.580073	0.909091	1	0.540185	0.879473	1	0.5		0	0	0	0.0328701	0	0.345435	0.358354	0.311613	0.350697	0.350265	0.28748	3.7901e-13	3.7901e-13	0.34635	0.28748	0	0.334068	0.293311	3.7901e-13	0.316228
DNDPt27m		1	1	1	0.987656	1	0.764569	0.680027	0.848627	0.598473	0.594647	0.909091	1	1	0.580073	0.909091	1	0.540185	0.879473	1	0.5		0	0	0	0.0328701	0	0.345435	0.358354	0.311613	0.350697	0.350265	0.28748	3.7901e-13	3.7901e-13	0.34635	0.28748	0	0.334068	0.293311	3.7901e-13	0.316228
DNDPt28m		1	1	1	0.987656	1	0.764569	0.680027	0.848627	0.598473	0.594647	0.909091	1	1	0.580073	0.909091	1	0.540185	0.879473	1	0.5		0	0	0	0.0328701	0	0.345435	0.358354	0.311613	0.350697	0.350265	0.28748	3.7901e-13	3.7901e-13	0.34635	0.28748	0	0.334068	0.293311	3.7901e-13	0.316228
DNDPt29m		1	1	1	0.987656	1	0.764569	0.680027	0.848627	0.598473	0.594647	0.909091	1	1	0.580073	0.909091	1	0.540185	0.879473	1	0.5		0	0	0	0.0328701	0	0.345435	0.358354	0.311613	0.350697	0.350265	0.28748	3.7901e-13	3.7901e-13	0.34635	0.28748	0	0.334068	0.293311	3.7901e-13	0.316228
DNDPt2m		1	1	1	0.987656	1	0.764569	0.680027	0.819951	0.598473	0.594647	0.909091	0.959534	0.959534	0.580073	0.909091	1	0.540185	0.879473	0.959534	0.5		0	0	0	0.0328701	0	0.345435	0.358354	0.321675	0.350697	0.350265	0.28748	0.127965	0.127965	0.34635	0.28748	0	0.334068	0.293311	0.127965	0.316228
DNDPt30m		1	1	1	0.987656	1	0.764569	0.680027	0.819951	0.598473	0.594647	0.909091	0.959534	0.959534	0.580073	0.909091	1	0.540185	0.879473	0.959534	0.5		0	0	0	0.0328701	0	0.345435	0.358354	0.321675	0.350697	0.350265	0.28748	0.127965	0.127965	0.34635	0.28748	0	0.334068	0.293311	0.127965	0.316228
DNDPt31m		1	1	1	0.987656	1	0.764569	0.680027	0.819951	0.598473	0.594647	0.909091	0.959534	0.959534	0.580073	0.909091	1	0.540185	0.879473	0.959534	0.5		0	0	0	0.0328701	0	0.345435	0.358354	0.321675	0.350697	0.350265	0.28748	0.127965	0.127965	0.34635	0.28748	0	0.334068	0.293311	0.127965	0.316228
DNDPt32m		1	1	1	0.987656	1	0.764569	0.680027	0.819951	0.598473	0.594647	0.909091	0.959534	0.959534	0.580073	0.909091	1	0.540185	0.879473	0.959534	0.5		0	0	0	0.0328701	0	0.345435	0.358354	0.321675	0.350697	0.350265	0.28748	0.127965	0.127965	0.34635	0.28748	0	0.334068	0.293311	0.127965	0.316228
DNDPt33m		1	1	1	0.987656	1	0.764569	0.680027	0.848627	0.598473	0.594647	0.909091	1	1	0.580073	0.909091	1	0.540185	0.879473	1	0.5		0	0	0	0.0328701	0	0.345435	0.358354	0.311613	0.350697	0.350265	0.28748	3.7901e-13	3.7901e-13	0.34635	0.28748	0	0.334068	0.293311	3.7901e-13	0.316228
DNDPt34m		1	1	1	0.987656	1	0.764569	0.680027	0.848627	0.598473	0.594647	0.909091	1	1	0.580073	0.909091	1	0.540185	0.879473	1	0.5		0	0	0	0.0328701	0	0.345435	0.358354	0.311613	0.350697	0.350265	0.28748	3.7901e-13	3.7901e-13	0.34635	0.28748	0	0.334068	0.293311	3.7901e-13	0.316228
DNDPt35m		1	1	1	0.987656	1	0.764569	0.680027	0.848627	0.598473	0.594647	0.909091	1	1	0.580073	0.909091	1	0.540185	0.879473	1	0.5		0	0	0	0.0328701	0	0.345435	0.358354	0.311613	0.350697	0.350265	0.28748	3.7901e-13	3.7901e-13	0.34635	0.28748	0	0.334068	0.293311	3.7901e-13	0.316228
DNDPt36m		1	1	1	0.987656	1	0.764569	0.680027	0.848627	0.598473	0.594647	0.909091	1	1	0.580073	0.909091	1	0.540185	0.879473	1	0.5		0	0	0	0.0328701	0	0.345435	0.358354	0.311613	0.350697	0.350265	0.28748	3.7901e-13	3.7901e-13	0.34635	0.28748	0	0.334068	0.293311	3.7901e-13	0.316228
DNDPt37m		1	1	1	0.987656	1	0.764569	0.680027	0.848627	0.598473	0.594647	0.909091	1	1	0.580073	0.909091	1	0.540185	0.879473	1	0.5		0	0	0	0.0328701	0	0.345435	0.358354	0.311613	0.350697	0.350265	0.28748	3.7901e-13	3.7901e-13	0.34635	0.28748	0	0.334068	0.293311	3.7901e-13	0.316228
DNDPt38m		1	1	1	0.987656	1	0.764569	0.680027	0.848627	0.598473	0.594647	0.909091	1	1	0.580073	0.909091	1	0.540185	0.879473	1	0.5		0	0	0	0.0328701	0	0.345435	0.358354	0.311613	0.350697	0.350265	0.28748	3.7901e-13	3.7901e-13	0.34635	0.28748	0	0.334068	0.293311	3.7901e-13	0.316228
DNDPt39m		1	1	1	0.987656	1	0.764569	0.680027	0.848627	0.598473	0.594647	0.909091	1	1	0.580073	0.909091	1	0.540185	0.879473	1	0.5		0	0	0	0.0328701	0	0.345435	0.358354	0.311613	0.350697	0.350265	0.28748	3.7901e-13	3.7901e-13	0.34635	0.28748	0	0.334068	0.293311	3.7901e-13	0.316228
DNDPt3m		1	1	1	0.987656	1	0.764569	0.680027	0.848627	0.598473	0.594647	0.909091	1	1	0.580073	0.909091	1	0.540185	0.879473	1	0.5		0	0	0	0.0328701	0	0.345435	0.358354	0.311613	0.350697	0.350265	0.28748	3.7901e-13	3.7901e-13	0.34635	0.28748	0	0.334068	0.293311	3.7901e-13	0.316228
DNDPt40m		1	1	1	0.987656	1	0.764569	0.680027	0.848627	0.598473	0.594647	0.909091	1	1	0.580073	0.909091	1	0.540185	0.879473	1	0.5		0	0	0	0.0328701	0	0.345435	0.358354	0.311613	0.350697	0.350265	0.28748	3.7901e-13	3.7901e-13	0.34635	0.28748	0	0.334068	0.293311	3.7901e-13	0.316228
DNDPt41m		1	1	1	0.987656	1	0.764569	0.680027	0.848627	0.598473	0.594647	0.909091	1	1	0.580073	0.909091	1	0.540185	0.879473	1	0.5		0	0	0	0.0328701	0	0.345435	0.358354	0.311613	0.350697	0.350265	0.28748	3.7901e-13	3.7901e-13	0.34635	0.28748	0	0.334068	0.293311	3.7901e-13	0.316228
DNDPt42m		1	1	1	0.987656	1	0.764569	0.680027	0.819951	0.598473	0.594647	0.909091	0.959534	0.959534	0.580073	0.909091	1	0.540185	0.879473	0.959534	0.5		0	0	0	0.0328701	0	0.345435	0.358354	0.321675	0.350697	0.350265	0.28748	0.127965	0.127965	0.34635	0.28748	0	0.334068	0.293311	0.127965	0.316228
DNDPt43m		1	1	1	0.987656	1	0.764569	0.680027	0.819951	0.598473	0.594647	0.909091	0.959534	0.959534	0.580073	0.909091	1	0.540185	0.879473	0.959534	0.5		0	0	0	0.0328701	0	0.345435	0.358354	0.321675	0.350697	0.350265	0.28748	0.127965	0.127965	0.34635	0.28748	0	0.334068	0.293311	0.127965	0.316228
DNDPt44m		1	1	1	0.987656	1	0.764569	0.680027	0.819951	0.598473	0.594647	0.909091	0.959534	0.959534	0.580073	0.909091	1	0.540185	0.879473	0.959534	0.5		0	0	0	0.0328701	0	0.345435	0.358354	0.321675	0.350697	0.350265	0.28748	0.127965	0.127965	0.34635	0.28748	0	0.334068	0.293311	0.127965	0.316228
DNDPt45m		1	1	1	0.987656	1	0.764569	0.680027	0.819951	0.598473	0.594647	0.909091	0.959534	0.959534	0.580073	0.909091	1	0.540185	0.879473	0.959534	0.5		0	0	0	0.0328701	0	0.345435	0.358354	0.321675	0.350697	0.350265	0.28748	0.127965	0.127965	0.34635	0.28748	0	0.334068	0.293311	0.127965	0.316228
DNDPt46m		1	1	1	0.987656	1	0.764569	0.680027	0.848627	0.598473	0.594647	0.909091	1	1	0.580073	0.909091	1	0.540185	0.879473	1	0.5		0	0	0	0.0328701	0	0.345435	0.358354	0.311613	0.350697	0.350265	0.28748	3.7901e-13	3.7901e-13	0.34635	0.28748	0	0.334068	0.293311	3.7901e-13	0.316228
DNDPt47m		1	1	1	0.987656	1	0.764569	0.680027	0.848627	0.598473	0.594647	0.909091	1	1	0.580073	0.909091	1	0.540185	0.879473	1	0.5		0	0	0	0.0328701	0	0.345435	0.358354	0.311613	0.350697	0.350265	0.28748	3.7901e-13	3.7901e-13	0.34635	0.28748	0	0.334068	0.293311	3.7901e-13	0.316228
DNDPt48m		1	1	1	0.987656	1	0.764569	0.680027	0.848627	0.598473	0.594647	0.909091	1	1	0.580073	0.909091	1	0.540185	0.879473	1	0.5		0	0	0	0.0328701	0	0.345435	0.358354	0.311613	0.350697	0.350265	0.28748	3.7901e-13	3.7901e-13	0.34635	0.28748	0	0.334068	0.293311	3.7901e-13	0.316228
DNDPt49m		1	1	1	0.987656	1	0.764569	0.680027	0.848627	0.598473	0.594647	0.909091	1	1	0.580073	0.909091	1	0.540185	0.879473	1	0.5		0	0	0	0.0328701	0	0.345435	0.358354	0.311613	0.350697	0.350265	0.28748	3.7901e-13	3.7901e-13	0.34635	0.28748	0	0.334068	0.293311	3.7901e-13	0.316228
DNDPt4m		1	1	1	0.987656	1	0.764569	0.680027	0.848627	0.598473	0.594647	0.909091	1	1	0.580073	0.909091	1	0.540185	0.879473	1	0.5		0	0	0	0.0328701	0	0.345435	0.358354	0.311613	0.350697	0.350265	0.28748	3.7901e-13	3.7901e-13	0.34635	0.28748	0	0.334068	0.293311	3.7901e-13	0.316228
DNDPt50m		1	1	1	0.987656	1	0.764569	0.680027	0.848627	0.598473	0.594647	0.909091	1	1	0.580073	0.909091	1	0.540185	0.879473	1	0.5		0	0	0	0.0328701	0	0.345435	0.358354	0.311613	0.350697	0.350265	0.28748	3.7901e-13	3.7901e-13	0.34635	0.28748	0	0.334068	0.293311	3.7901e-13	0.316228
DNDPt51m		1	1	1	0.987656	1	0.764569	0.680027	0.848627	0.598473	0.594647	0.909091	1	1	0.580073	0.909091	1	0.540185	0.879473	1	0.5		0	0	0	0.0328701	0	0.345435	0.358354	0.311613	0.350697	0.350265	0.28748	3.7901e-13	3.7901e-13	0.34635	0.28748	0	0.334068	0.293311	3.7901e-13	0.316228
DNDPt52m		1	1	1	0.987656	1	0.764569	0.680027	0.848627	0.598473	0.594647	0.909091	1	1	0.580073	0.909091	1	0.540185	0.879473	1	0.5		0	0	0	0.0328701	0	0.345435	0.358354	0.311613	0.350697	0.350265	0.28748	3.7901e-13	3.7901e-13	0.34635	0.28748	0	0.334068	0.293311	3.7901e-13	0.316228
DNDPt53m		1	1	1	0.987656	1	0.764569	0.680027	0.848627	0.598473	0.594647	0.909091	1	1	0.580073	0.909091	1	0.540185	0.879473	1	0.5		0	0	0	0.0328701	0	0.345435	0.358354	0.311613	0.350697	0.350265	0.28748	3.7901e-13	3.7901e-13	0.34635	0.28748	0	0.334068	0.293311	3.7901e-13	0.316228
DNDPt54m		1	1	1	0.987656	1	0.764569	0.680027	0.848627	0.598473	0.594647	0.909091	1	1	0.580073	0.909091	1	0.540185	0.879473	1	0.5		0	0	0	0.0328701	0	0.345435	0.358354	0.311613	0.350697	0.350265	0.28748	3.7901e-13	3.7901e-13	0.34635	0.28748	0	0.334068	0.293311	3.7901e-13	0.316228
DNDPt55m		1	1	1	0.987656	1	0.764569	0.680027	0.819951	0.598473	0.594647	0.909091	0.959534	0.959534	0.580073	0.909091	1	0.540185	0.879473	0.959534	0.5		0	0	0	0.0328701	0	0.345435	0.358354	0.321675	0.350697	0.350265	0.28748	0.127965	0.127965	0.34635	0.28748	0	0.334068	0.293311	0.127965	0.316228
DNDPt56m		1	1	1	0.987656	1	0.764569	0.680027	0.819951	0.598473	0.594647	0.909091	0.959534	0.959534	0.580073	0.909091	1	0.540185	0.879473	0.959534	0.5		0	0	0	0.0328701	0	0.345435	0.358354	0.321675	0.350697	0.350265	0.28748	0.127965	0.127965	0.34635	0.28748	0	0.334068	0.293311	0.127965	0.316228
DNDPt57m		1	1	1	0.987656	1	0.764569	0.680027	0.819951	0.598473	0.594647	0.909091	0.959534	0.959534	0.580073	0.909091	1	0.540185	0.879473	0.959534	0.5		0	0	0	0.0328701	0	0.345435	0.358354	0.321675	0.350697	0.350265	0.28748	0.127965	0.127965	0.34635	0.28748	0	0.334068	0.293311	0.127965	0.316228
DNDPt58m		1	1	1	0.987656	1	0.764569	0.680027	0.819951	0.598473	0.594647	0.909091	0.959534	0.959534	0.580073	0.909091	1	0.540185	0.879473	0.959534	0.5		0	0	0	0.0328701	0	0.345435	0.358354	0.321675	0.350697	0.350265	0.28748	0.127965	0.127965	0.34635	0.28748	0	0.334068	0.293311	0.127965	0.316228
DNDPt59m		1	1	1	0.987656	1	0.764569	0.680027	0.848627	0.598473	0.594647	0.909091	1	1	0.580073	0.909091	1	0.540185	0.879473	1	0.5		0	0	0	0.0328701	0	0.345435	0.358354	0.311613	0.350697	0.350265	0.28748	3.7901e-13	3.7901e-13	0.34635	0.28748	0	0.334068	0.293311	3.7901e-13	0.316228
DNDPt5m		1	1	1	0.987656	1	0.764569	0.680027	0.848627	0.598473	0.594647	0.909091	1	1	0.580073	0.909091	1	0.540185	0.879473	1	0.5		0	0	0	0.0328701	0	0.345435	0.358354	0.311613	0.350697	0.350265	0.28748	3.7901e-13	3.7901e-13	0.34635	0.28748	0	0.334068	0.293311	3.7901e-13	0.316228
DNDPt60m		1	1	1	0.987656	1	0.764569	0.680027	0.848627	0.598473	0.594647	0.909091	1	1	0.580073	0.909091	1	0.540185	0.879473	1	0.5		0	0	0	0.0328701	0	0.345435	0.358354	0.311613	0.350697	0.350265	0.28748	3.7901e-13	3.7901e-13	0.34635	0.28748	0	0.334068	0.293311	3.7901e-13	0.316228
DNDPt61m		1	1	1	0.987656	1	0.764569	0.680027	0.848627	0.598473	0.594647	0.909091	1	1	0.580073	0.909091	1	0.540185	0.879473	1	0.5		0	0	0	0.0328701	0	0.345435	0.358354	0.311613	0.350697	0.350265	0.28748	3.7901e-13	3.7901e-13	0.34635	0.28748	0	0.334068	0.293311	3.7901e-13	0.316228
DNDPt62m		1	1	1	0.987656	1	0.764569	0.680027	0.848627	0.598473	0.594647	0.909091	1	1	0.580073	0.909091	1	0.540185	0.879473	1	0.5		0	0	0	0.0328701	0	0.345435	0.358354	0.311613	0.350697	0.350265	0.28748	3.7901e-13	3.7901e-13	0.34635	0.28748	0	0.334068	0.293311	3.7901e-13	0.316228
DNDPt63m		1	1	1	0.987656	1	0.764569	0.680027	0.848627	0.598473	0.594647	0.909091	1	1	0.580073	0.909091	1	0.540185	0.879473	1	0.5		0	0	0	0.0328701	0	0.345435	0.358354	0.311613	0.350697	0.350265	0.28748	3.7901e-13	3.7901e-13	0.34635	0.28748	0	0.334068	0.293311	3.7901e-13	0.316228
DNDPt6m		1	1	1	0.987656	1	0.764569	0.680027	0.848627	0.598473	0.594647	0.909091	1	1	0.580073	0.909091	1	0.540185	0.879473	1	0.5		0	0	0	0.0328701	0	0.345435	0.358354	0.311613	0.350697	0.350265	0.28748	3.7901e-13	3.7901e-13	0.34635	0.28748	0	0.334068	0.293311	3.7901e-13	0.316228
DNDPt7m		1	1	1	0.987656	1	0.764569	0.680027	0.848627	0.598473	0.594647	0.909091	1	1	0.580073	0.909091	1	0.540185	0.879473	1	0.5		0	0	0	0.0328701	0	0.345435	0.358354	0.311613	0.350697	0.350265	0.28748	3.7901e-13	3.7901e-13	0.34635	0.28748	0	0.334068	0.293311	3.7901e-13	0.316228
DNDPt8m		1	1	1	0.987656	1	0.764569	0.680027	0.848627	0.598473	0.594647	0.909091	1	1	0.580073	0.909091	1	0.540185	0.879473	1	0.5		0	0	0	0.0328701	0	0.345435	0.358354	0.311613	0.350697	0.350265	0.28748	3.7901e-13	3.7901e-13	0.34635	0.28748	0	0.334068	0.293311	3.7901e-13	0.316228
DNDPt9m		1	1	1	0.987656	1	0.764569	0.680027	0.848627	0.598473	0.594647	0.909091	1	1	0.580073	0.909091	1	0.540185	0.879473	1	0.5		0	0	0	0.0328701	0	0.345435	0.358354	0.311613	0.350697	0.350265	0.28748	3.7901e-13	3.7901e-13	0.34635	0.28748	0	0.334068	0.293311	3.7901e-13	0.316228
DOGULND1		1	1	1	0.987656	1	0.764569	0.680027	0.848627	0.598473	0.594647	0.909091	1	1	0.580073	0.909091	1	0.540185	0.879473	1	0.5		0	0	0	0.0328701	0	0.345435	0.358354	0.311613	0.350697	0.350265	0.28748	3.7901e-13	3.7901e-13	0.34635	0.28748	0	0.334068	0.293311	3.7901e-13	0.316228
DOGULND2		1	1	1	0.987656	1	0.764569	0.680027	0.848627	0.598473	0.594647	0.909091	1	1	0.580073	0.909091	1	0.540185	0.879473	1	0.5		0	0	0	0.0328701	0	0.345435	0.358354	0.311613	0.350697	0.350265	0.28748	3.7901e-13	3.7901e-13	0.34635	0.28748	0	0.334068	0.293311	3.7901e-13	0.316228
DOGULNO1		1	1	1	0.987656	1	0.764569	0.680027	0.848627	0.598473	0.594647	0.909091	1	1	0.580073	0.909091	1	0.540185	0.879473	1	0.5		0	0	0	0.0328701	0	0.345435	0.358354	0.311613	0.350697	0.350265	0.28748	3.7901e-13	3.7901e-13	0.34635	0.28748	0	0.334068	0.293311	3.7901e-13	0.316228
DOGULNO2		1	1	1	0.987656	1	0.764569	0.680027	0.848627	0.598473	0.594647	0.909091	1	1	0.580073	0.909091	1	0.540185	0.879473	1	0.5		0	0	0	0.0328701	0	0.345435	0.358354	0.311613	0.350697	0.350265	0.28748	3.7901e-13	3.7901e-13	0.34635	0.28748	0	0.334068	0.293311	3.7901e-13	0.316228
DOLASNT_Ler		1	1	1	0.987656	1	0.764569	0.680027	0.848627	0.598473	0.594647	0.909091	0.954545	0.954545	0.580073	0.909091	1	0.540185	0.879473	0.954545	0.5		0	0	0	0.0328701	0	0.345435	0.358354	0.311613	0.350697	0.350265	0.28748	0.14374	0.14374	0.34635	0.28748	0	0.334068	0.293311	0.14374	0.316228
DOLASNT_Uer		1	1	1	0.987656	1	0.764569	0.680027	0.848627	0.598473	0.594647	0.909091	0.954545	0.954545	0.580073	0.909091	1	0.540185	0.879473	0.954545	0.5		0	0	0	0.0328701	0	0.345435	0.358354	0.311613	0.350697	0.350265	0.28748	0.14374	0.14374	0.34635	0.28748	0	0.334068	0.293311	0.14374	0.316228
DOLDPP_Ler		1	1	1	0.987656	1	0.764569	0.680027	0.848627	0.598473	0.594647	0.909091	0.954545	0.954545	0.580073	0.909091	1	0.540185	0.879473	0.954545	0.5		0	0	0	0.0328701	0	0.345435	0.358354	0.311613	0.350697	0.350265	0.28748	0.14374	0.14374	0.34635	0.28748	0	0.334068	0.293311	0.14374	0.316228
DOLDPP_Uer		1	1	1	0.987656	1	0.764569	0.680027	0.848627	0.598473	0.594647	0.909091	0.954545	0.954545	0.580073	0.909091	1	0.540185	0.879473	0.954545	0.5		0	0	0	0.0328701	0	0.345435	0.358354	0.311613	0.350697	0.350265	0.28748	0.14374	0.14374	0.34635	0.28748	0	0.334068	0.293311	0.14374	0.316228
DOLGLCP_Lter		1	1	1	0.987656	1	0.764569	0.680027	0.848627	0.598473	0.594647	0.909091	0.954545	0.954545	0.580073	0.909091	1	0.540185	0.879473	0.954545	0.5		0	0	0	0.0328701	0	0.345435	0.358354	0.311613	0.350697	0.350265	0.28748	0.14374	0.14374	0.34635	0.28748	0	0.334068	0.293311	0.14374	0.316228
DOLGLCP_Uter		1	1	1	0.987656	1	0.764569	0.680027	0.848627	0.598473	0.594647	0.909091	0.954545	0.954545	0.580073	0.909091	1	0.540185	0.879473	0.954545	0.5		0	0	0	0.0328701	0	0.345435	0.358354	0.311613	0.350697	0.350265	0.28748	0.14374	0.14374	0.34635	0.28748	0	0.334068	0.293311	0.14374	0.316228
DOLGPP_Ler		1	1	1	0.987656	1	0.764569	0.680027	0.848627	0.598473	0.594647	0.909091	0.954545	0.954545	0.580073	0.909091	1	0.540185	0.879473	0.954545	0.5		0	0	0	0.0328701	0	0.345435	0.358354	0.311613	0.350697	0.350265	0.28748	0.14374	0.14374	0.34635	0.28748	0	0.334068	0.293311	0.14374	0.316228
DOLGPP_Uer		1	1	1	0.987656	1	0.764569	0.680027	0.848627	0.598473	0.594647	0.909091	0.954545	0.954545	0.580073	0.909091	1	0.540185	0.879473	0.954545	0.5		0	0	0	0.0328701	0	0.345435	0.358354	0.311613	0.350697	0.350265	0.28748	0.14374	0.14374	0.34635	0.28748	0	0.334068	0.293311	0.14374	0.316228
DOLICHOL_Lter		1	1	1	0.987656	1	0.764569	0.680027	0.848627	0.598473	0.594647	0.909091	0.954545	0.954545	0.580073	0.909091	1	0.540185	0.879473	0.954545	0.5		0	0	0	0.0328701	0	0.345435	0.358354	0.311613	0.350697	0.350265	0.28748	0.14374	0.14374	0.34635	0.28748	0	0.334068	0.293311	0.14374	0.316228
DOLICHOL_Uter		1	1	1	0.987656	1	0.764569	0.680027	0.848627	0.598473	0.594647	0.909091	0.954545	0.954545	0.580073	0.909091	1	0.540185	0.879473	0.954545	0.5		0	0	0	0.0328701	0	0.345435	0.358354	0.311613	0.350697	0.350265	0.28748	0.14374	0.14374	0.34635	0.28748	0	0.334068	0.293311	0.14374	0.316228
DOLK_L		1	1	1	0.987656	1	0.764569	0.680027	0.848627	0.598473	0.594647	0.909091	0.954545	0.954545	0.580073	0.909091	1	0.540185	0.879473	0.954545	0.5		0	0	0	0.0328701	0	0.345435	0.358354	0.311613	0.350697	0.350265	0.28748	0.14374	0.14374	0.34635	0.28748	0	0.334068	0.293311	0.14374	0.316228
DOLK_U		1	1	1	0.987656	1	0.764569	0.680027	0.848627	0.598473	0.594647	0.909091	0.954545	0.954545	0.580073	0.909091	1	0.540185	0.879473	0.954545	0.5		0	0	0	0.0328701	0	0.345435	0.358354	0.311613	0.350697	0.350265	0.28748	0.14374	0.14374	0.34635	0.28748	0	0.334068	0.293311	0.14374	0.316228
DOLMANP_Lter		1	1	1	0.987656	1	0.764569	0.680027	0.848627	0.598473	0.594647	0.909091	0.954545	0.954545	0.580073	0.909091	1	0.540185	0.879473	0.954545	0.5		0	0	0	0.0328701	0	0.345435	0.358354	0.311613	0.350697	0.350265	0.28748	0.14374	0.14374	0.34635	0.28748	0	0.334068	0.293311	0.14374	0.316228
DOLMANP_Uter		1	1	1	0.987656	1	0.764569	0.680027	0.848627	0.598473	0.594647	0.909091	0.954545	0.954545	0.580073	0.909091	1	0.540185	0.879473	0.954545	0.5		0	0	0	0.0328701	0	0.345435	0.358354	0.311613	0.350697	0.350265	0.28748	0.14374	0.14374	0.34635	0.28748	0	0.334068	0.293311	0.14374	0.316228
DOLPGT1_Ler		1	1	1	0.987656	1	0.764569	0.680027	0.848627	0.598473	0.594647	0.909091	0.954545	0.954545	0.580073	0.909091	1	0.540185	0.879473	0.954545	0.5		0	0	0	0.0328701	0	0.345435	0.358354	0.311613	0.350697	0.350265	0.28748	0.14374	0.14374	0.34635	0.28748	0	0.334068	0.293311	0.14374	0.316228
DOLPGT1_Uer		1	1	1	0.987656	1	0.764569	0.680027	0.848627	0.598473	0.594647	0.909091	0.954545	0.954545	0.580073	0.909091	1	0.540185	0.879473	0.954545	0.5		0	0	0	0.0328701	0	0.345435	0.358354	0.311613	0.350697	0.350265	0.28748	0.14374	0.14374	0.34635	0.28748	0	0.334068	0.293311	0.14374	0.316228
DOLPGT2_Ler		1	1	1	0.987656	1	0.764569	0.680027	0.848627	0.598473	0.594647	0.909091	0.954545	0.954545	0.580073	0.909091	1	0.540185	0.879473	0.954545	0.5		0	0	0	0.0328701	0	0.345435	0.358354	0.311613	0.350697	0.350265	0.28748	0.14374	0.14374	0.34635	0.28748	0	0.334068	0.293311	0.14374	0.316228
DOLPGT2_Uer		1	1	1	0.987656	1	0.764569	0.680027	0.848627	0.598473	0.594647	0.909091	0.954545	0.954545	0.580073	0.909091	1	0.540185	0.879473	0.954545	0.5		0	0	0	0.0328701	0	0.345435	0.358354	0.311613	0.350697	0.350265	0.28748	0.14374	0.14374	0.34635	0.28748	0	0.334068	0.293311	0.14374	0.316228
DOLPGT3_Ler		1	1	1	0.987656	1	0.764569	0.680027	0.848627	0.598473	0.594647	0.909091	0.954545	0.954545	0.580073	0.909091	1	0.540185	0.879473	0.954545	0.5		0	0	0	0.0328701	0	0.345435	0.358354	0.311613	0.350697	0.350265	0.28748	0.14374	0.14374	0.34635	0.28748	0	0.334068	0.293311	0.14374	0.316228
DOLPGT3_Uer		1	1	1	0.987656	1	0.764569	0.680027	0.848627	0.598473	0.594647	0.909091	0.954545	0.954545	0.580073	0.909091	1	0.540185	0.879473	0.954545	0.5		0	0	0	0.0328701	0	0.345435	0.358354	0.311613	0.350697	0.350265	0.28748	0.14374	0.14374	0.34635	0.28748	0	0.334068	0.293311	0.14374	0.316228
DOLPH_Ler		1	1	1	0.987656	1	0.764569	0.680027	0.848627	0.598473	0.594647	0.909091	0.954545	0.954545	0.580073	0.909091	1	0.540185	0.879473	0.954545	0.5		0	0	0	0.0328701	0	0.345435	0.358354	0.311613	0.350697	0.350265	0.28748	0.14374	0.14374	0.34635	0.28748	0	0.334068	0.293311	0.14374	0.316228
DOLPH_Uer		1	1	1	0.987656	1	0.764569	0.680027	0.848627	0.598473	0.594647	0.909091	0.954545	0.954545	0.580073	0.909091	1	0.540185	0.879473	0.954545	0.5		0	0	0	0.0328701	0	0.345435	0.358354	0.311613	0.350697	0.350265	0.28748	0.14374	0.14374	0.34635	0.28748	0	0.334068	0.293311	0.14374	0.316228
DOLPMT1_Ler		1	1	1	0.987656	1	0.764569	0.680027	0.848627	0.598473	0.594647	0.909091	0.954545	0.954545	0.580073	0.909091	1	0.540185	0.879473	0.954545	0.5		0	0	0	0.0328701	0	0.345435	0.358354	0.311613	0.350697	0.350265	0.28748	0.14374	0.14374	0.34635	0.28748	0	0.334068	0.293311	0.14374	0.316228
DOLPMT1_Uer		1	1	1	0.987656	1	0.764569	0.680027	0.848627	0.598473	0.594647	0.909091	0.954545	0.954545	0.580073	0.909091	1	0.540185	0.879473	0.954545	0.5		0	0	0	0.0328701	0	0.345435	0.358354	0.311613	0.350697	0.350265	0.28748	0.14374	0.14374	0.34635	0.28748	0	0.334068	0.293311	0.14374	0.316228
DOLPMT2_Ler		1	1	1	0.987656	1	0.764569	0.680027	0.848627	0.598473	0.594647	0.909091	0.954545	0.954545	0.580073	0.909091	1	0.540185	0.879473	0.954545	0.5		0	0	0	0.0328701	0	0.345435	0.358354	0.311613	0.350697	0.350265	0.28748	0.14374	0.14374	0.34635	0.28748	0	0.334068	0.293311	0.14374	0.316228
DOLPMT2_Uer		1	1	1	0.987656	1	0.764569	0.680027	0.848627	0.598473	0.594647	0.909091	0.954545	0.954545	0.580073	0.909091	1	0.540185	0.879473	0.954545	0.5		0	0	0	0.0328701	0	0.345435	0.358354	0.311613	0.350697	0.350265	0.28748	0.14374	0.14374	0.34635	0.28748	0	0.334068	0.293311	0.14374	0.316228
DOLPMT3_Ler		1	1	1	0.987656	1	0.764569	0.680027	0.848627	0.598473	0.594647	0.909091	0.954545	0.954545	0.580073	0.909091	1	0.540185	0.879473	0.954545	0.5		0	0	0	0.0328701	0	0.345435	0.358354	0.311613	0.350697	0.350265	0.28748	0.14374	0.14374	0.34635	0.28748	0	0.334068	0.293311	0.14374	0.316228
DOLPMT3_Uer		1	1	1	0.987656	1	0.764569	0.680027	0.848627	0.598473	0.594647	0.909091	0.954545	0.954545	0.580073	0.909091	1	0.540185	0.879473	0.954545	0.5		0	0	0	0.0328701	0	0.345435	0.358354	0.311613	0.350697	0.350265	0.28748	0.14374	0.14374	0.34635	0.28748	0	0.334068	0.293311	0.14374	0.316228
DOLPMT4_Ler		1	1	1	0.987656	1	0.764569	0.680027	0.848627	0.598473	0.594647	0.909091	0.954545	0.954545	0.580073	0.909091	1	0.540185	0.879473	0.954545	0.5		0	0	0	0.0328701	0	0.345435	0.358354	0.311613	0.350697	0.350265	0.28748	0.14374	0.14374	0.34635	0.28748	0	0.334068	0.293311	0.14374	0.316228
DOLPMT4_Uer		1	1	1	0.987656	1	0.764569	0.680027	0.848627	0.598473	0.594647	0.909091	0.954545	0.954545	0.580073	0.909091	1	0.540185	0.879473	0.954545	0.5		0	0	0	0.0328701	0	0.345435	0.358354	0.311613	0.350697	0.350265	0.28748	0.14374	0.14374	0.34635	0.28748	0	0.334068	0.293311	0.14374	0.316228
DOLPMT_L		1	1	1	0.987656	1	0.764569	0.680027	0.848627	0.598473	0.594647	0.909091	0.954545	0.954545	0.580073	0.909091	1	0.540185	0.879473	0.954545	0.5		0	0	0	0.0328701	0	0.345435	0.358354	0.311613	0.350697	0.350265	0.28748	0.14374	0.14374	0.34635	0.28748	0	0.334068	0.293311	0.14374	0.316228
DOLPMT_U		1	1	1	0.987656	1	0.764569	0.680027	0.848627	0.598473	0.594647	0.909091	0.954545	0.954545	0.580073	0.909091	1	0.540185	0.879473	0.954545	0.5		0	0	0	0.0328701	0	0.345435	0.358354	0.311613	0.350697	0.350265	0.28748	0.14374	0.14374	0.34635	0.28748	0	0.334068	0.293311	0.14374	0.316228
DOLP_Lter		1	1	1	0.987656	1	0.764569	0.680027	0.848627	0.598473	0.594647	0.909091	0.954545	0.954545	0.580073	0.909091	1	0.540185	0.879473	0.954545	0.5		0	0	0	0.0328701	0	0.345435	0.358354	0.311613	0.350697	0.350265	0.28748	0.14374	0.14374	0.34635	0.28748	0	0.334068	0.293311	0.14374	0.316228
DOLP_Uter		1	1	1	0.987656	1	0.764569	0.680027	0.848627	0.598473	0.594647	0.909091	0.954545	0.954545	0.580073	0.909091	1	0.540185	0.879473	0.954545	0.5		0	0	0	0.0328701	0	0.345435	0.358354	0.311613	0.350697	0.350265	0.28748	0.14374	0.14374	0.34635	0.28748	0	0.334068	0.293311	0.14374	0.316228
DOPABMO		1	1	1	0.987656	1	0.764569	0.680027	0.848627	0.598473	0.594647	0.909091	1	1	0.580073	0.909091	1	0.540185	0.879473	1	0.5		0	0	0	0.0328701	0	0.345435	0.358354	0.311613	0.350697	0.350265	0.28748	3.7901e-13	3.7901e-13	0.34635	0.28748	0	0.334068	0.293311	3.7901e-13	0.316228
DOPAMT		1	1	1	0.987656	1	0.764569	0.680027	0.848627	0.598473	0.594647	0.909091	1	1	0.580073	0.909091	1	0.540185	0.879473	1	0.5		0	0	0	0.0328701	0	0.345435	0.358354	0.311613	0.350697	0.350265	0.28748	3.7901e-13	3.7901e-13	0.34635	0.28748	0	0.334068	0.293311	3.7901e-13	0.316228
DOPASFt		1	1	1	0.987656	1	0.764569	0.680027	0.848627	0.598473	0.594647	0.909091	1	1	0.580073	0.909091	1	0.540185	0.879473	1	0.5		0	0	0	0.0328701	0	0.345435	0.358354	0.311613	0.350697	0.350265	0.28748	3.7901e-13	3.7901e-13	0.34635	0.28748	0	0.334068	0.293311	3.7901e-13	0.316228
DOPASULT		1	1	1	0.987656	1	0.764569	0.680027	0.848627	0.598473	0.594647	0.909091	1	1	0.580073	0.909091	1	0.540185	0.879473	1	0.5		0	0	0	0.0328701	0	0.345435	0.358354	0.311613	0.350697	0.350265	0.28748	3.7901e-13	3.7901e-13	0.34635	0.28748	0	0.334068	0.293311	3.7901e-13	0.316228
DOPAVESSEC		1	1	1	0.987656	1	0.764569	0.680027	0.848627	0.598473	0.594647	0.909091	0.954545	0.954545	0.580073	0.909091	1	0.540185	0.879473	0.954545	0.5		0	0	0	0.0328701	0	0.345435	0.358354	0.311613	0.350697	0.350265	0.28748	0.14374	0.14374	0.34635	0.28748	0	0.334068	0.293311	0.14374	0.316228
DOPAt4(2)r		1	1	1	0.987656	1	0.764569	0.680027	0.848627	0.598473	0.594647	0.909091	1	1	0.580073	0.909091	1	0.540185	0.879473	1	0.5		0	0	0	0.0328701	0	0.345435	0.358354	0.311613	0.350697	0.350265	0.28748	3.7901e-13	3.7901e-13	0.34635	0.28748	0	0.334068	0.293311	3.7901e-13	0.316228
DOPAtu		1	1	1	0.987656	1	0.764569	0.680027	0.848627	0.598473	0.594647	0.909091	1	1	0.580073	0.909091	1	0.540185	0.879473	1	0.5		0	0	0	0.0328701	0	0.345435	0.358354	0.311613	0.350697	0.350265	0.28748	3.7901e-13	3.7901e-13	0.34635	0.28748	0	0.334068	0.293311	3.7901e-13	0.316228
DPCOAK		1	1	1	0.987656	1	0.764569	0.680027	0.848627	0.598473	0.594647	0.909091	1	1	0.580073	0.909091	1	0.540185	0.879473	1	0.5		0	0	0	0.0328701	0	0.345435	0.358354	0.311613	0.350697	0.350265	0.28748	3.7901e-13	3.7901e-13	0.34635	0.28748	0	0.334068	0.293311	3.7901e-13	0.316228
DPCOAPP		1	1	1	0.987656	1	0.764569	0.680027	0.848627	0.598473	0.594647	0.909091	0.954545	0.954545	0.580073	0.909091	1	0.540185	0.879473	0.954545	0.5		0	0	0	0.0328701	0	0.345435	0.358354	0.311613	0.350697	0.350265	0.28748	0.14374	0.14374	0.34635	0.28748	0	0.334068	0.293311	0.14374	0.316228
DPCOAtl		1	1	1	0.987656	1	0.764569	0.680027	0.848627	0.598473	0.594647	0.909091	1	1	0.580073	0.909091	1	0.540185	0.879473	1	0.5		0	0	0	0.0328701	0	0.345435	0.358354	0.311613	0.350697	0.350265	0.28748	3.7901e-13	3.7901e-13	0.34635	0.28748	0	0.334068	0.293311	3.7901e-13	0.316228
DPHMBDCm		1	1	1	0.987656	1	0.764569	0.680027	0.848627	0.598473	0.594647	0.909091	1	1	0.580073	0.909091	1	0.540185	0.879473	1	0.5		0	0	0	0.0328701	0	0.345435	0.358354	0.311613	0.350697	0.350265	0.28748	3.7901e-13	3.7901e-13	0.34635	0.28748	0	0.334068	0.293311	3.7901e-13	0.316228
DPMVDx		1	1	1	0.987656	1	0.764569	0.680027	0.848627	0.598473	0.594647	0.909091	0.956574	0.956474	0.580073	0.909091	1	0.540185	0.879473	0.956569	0.5		0	0	0	0.0328701	0	0.345435	0.358354	0.311613	0.350697	0.350265	0.28748	0.137325	0.13764	0.34635	0.28748	0	0.334068	0.293311	0.13734	0.316228
DRIBt		1	1	1	0.987656	1	0.764569	0.680027	0.848627	0.598473	0.594647	0.909091	0.955539	0.955724	0.580073	0.909091	1	0.540185	0.879473	0.955539	0.5		0	0	0	0.0328701	0	0.345435	0.358354	0.311613	0.350697	0.350265	0.28748	0.140597	0.140014	0.34635	0.28748	0	0.334068	0.293311	0.140597	0.316228
DRPA		1	1	1	0.987656	1	0.764569	0.680027	0.848627	0.598473	0.594647	0.909091	1	1	0.580073	0.909091	1	0.540185	0.879473	1	0.5		0	0	0	0.0328701	0	0.345435	0.358354	0.311613	0.350697	0.350265	0.28748	3.7901e-13	3.7901e-13	0.34635	0.28748	0	0.334068	0.293311	3.7901e-13	0.316228
DSAT		1	1	1	0.987571	1	0.764569	0.680027	0.819412	0.598473	0.594647	0.909091	0.957331	0.957455	0.580073	0.909091	1	0.540185	0.879473	0.957455	0.5		0	0	0	0.0330071	0	0.345435	0.358354	0.321479	0.350697	0.350265	0.28748	0.134933	0.13454	0.34635	0.28748	0	0.334068	0.293311	0.13454	0.316228
DTDPtn		1	1	1	0.987656	1	0.764569	0.680027	0.848627	0.598473	0.594647	0.909091	1	1	0.580073	0.909091	1	0.540185	0.879473	1	0.5		0	0	0	0.0328701	0	0.345435	0.358354	0.311613	0.350697	0.350265	0.28748	3.7901e-13	3.7901e-13	0.34635	0.28748	0	0.334068	0.293311	3.7901e-13	0.316228
DTMPK		1	1	1	0.987656	1	0.764569	0.680027	0.816536	0.598473	0.594647	0.909091	0.954976	0.954976	0.578872	0.909091	1	0.540185	0.879473	0.954976	0.5		0	0	0	0.0328701	0	0.345435	0.358354	0.321004	0.350697	0.350265	0.28748	0.142378	0.142378	0.347453	0.28748	0	0.334068	0.293311	0.142378	0.316228
DTTPtn		1	1	1	0.987656	1	0.764569	0.680027	0.848627	0.598473	0.594647	0.909091	1	1	0.580073	0.909091	1	0.540185	0.879473	1	0.5		0	0	0	0.0328701	0	0.345435	0.358354	0.311613	0.350697	0.350265	0.28748	3.7901e-13	3.7901e-13	0.34635	0.28748	0	0.334068	0.293311	3.7901e-13	0.316228
DUDPtn		1	1	1	0.987656	1	0.764569	0.680027	0.848627	0.598473	0.594647	0.909091	1	1	0.580073	0.909091	1	0.540185	0.879473	1	0.5		0	0	0	0.0328701	0	0.345435	0.358354	0.311613	0.350697	0.350265	0.28748	3.7901e-13	3.7901e-13	0.34635	0.28748	0	0.334068	0.293311	3.7901e-13	0.316228
DUMPtn		1	1	1	0.987656	1	0.764569	0.680027	0.848627	0.598473	0.594647	0.909091	1	1	0.580073	0.909091	1	0.540185	0.879473	1	0.5		0	0	0	0.0328701	0	0.345435	0.358354	0.311613	0.350697	0.350265	0.28748	3.7901e-13	3.7901e-13	0.34635	0.28748	0	0.334068	0.293311	3.7901e-13	0.316228
DURAD		1	1	1	0.987656	1	0.764569	0.680027	0.848627	0.598473	0.594647	0.909091	1	1	0.580073	0.909091	1	0.540185	0.879473	1	0.5		0	0	0	0.0328701	0	0.345435	0.358354	0.311613	0.350697	0.350265	0.28748	3.7901e-13	3.7901e-13	0.34635	0.28748	0	0.334068	0.293311	3.7901e-13	0.316228
DURAD2		1	1	1	0.987656	1	0.764569	0.680027	0.848627	0.598473	0.594647	0.909091	1	1	0.580073	0.909091	1	0.540185	0.879473	1	0.5		0	0	0	0.0328701	0	0.345435	0.358354	0.311613	0.350697	0.350265	0.28748	3.7901e-13	3.7901e-13	0.34635	0.28748	0	0.334068	0.293311	3.7901e-13	0.316228
DURIK1		1	1	1	0.987656	1	0.764569	0.680027	0.848627	0.598473	0.594647	0.909091	0.954545	0.954545	0.580073	0.909091	1	0.540185	0.879473	0.954545	0.5		0	0	0	0.0328701	0	0.345435	0.358354	0.311613	0.350697	0.350265	0.28748	0.14374	0.14374	0.34635	0.28748	0	0.334068	0.293311	0.14374	0.316228
DURIK1m		1	1	1	0.987656	1	0.764569	0.680027	0.848627	0.598473	0.594647	0.909091	0.954545	0.954545	0.580073	0.909091	1	0.540185	0.879473	0.954545	0.5		0	0	0	0.0328701	0	0.345435	0.358354	0.311613	0.350697	0.350265	0.28748	0.14374	0.14374	0.34635	0.28748	0	0.334068	0.293311	0.14374	0.316228
DURIPP		1	1	1	0.986782	1	0.764569	0.678474	0.814958	0.588219	0.594647	0.909091	0.954545	0.954545	0.569084	0.909091	1	0.540185	0.876613	0.954545	0.5		0	0	0	0.034306	0	0.345435	0.358193	0.320931	0.3481	0.350265	0.28748	0.14374	0.14374	0.342987	0.28748	0	0.334068	0.295445	0.14374	0.316228
DURIt		1	1	1	0.987656	1	0.764569	0.680027	0.815713	0.591851	0.594647	0.909091	0.954545	0.954545	0.572632	0.909091	1	0.540185	0.876902	0.954545	0.5		0	0	0	0.0328701	0	0.345435	0.358354	0.32077	0.3504	0.350265	0.28748	0.14374	0.14374	0.34536	0.28748	0	0.334068	0.295217	0.14374	0.316228
DURItn		1	1	1	0.987656	1	0.764569	0.680027	0.848627	0.598473	0.594647	0.909091	1	1	0.580073	0.909091	1	0.540185	0.879473	1	0.5		0	0	0	0.0328701	0	0.345435	0.358354	0.311613	0.350697	0.350265	0.28748	3.7901e-13	3.7901e-13	0.34635	0.28748	0	0.334068	0.293311	3.7901e-13	0.316228
DUTPDPm		1	1	1	0.987656	1	0.764569	0.680027	0.848627	0.598473	0.594647	0.909091	0.954545	0.954545	0.580073	0.909091	1	0.540185	0.879473	0.954545	0.5		0	0	0	0.0328701	0	0.345435	0.358354	0.311613	0.350697	0.350265	0.28748	0.14374	0.14374	0.34635	0.28748	0	0.334068	0.293311	0.14374	0.316228
DUTPDPn		1	1	1	0.987656	1	0.764569	0.680027	0.848627	0.598473	0.594647	0.909091	1	1	0.580073	0.909091	1	0.540185	0.879473	1	0.5		0	0	0	0.0328701	0	0.345435	0.358354	0.311613	0.350697	0.350265	0.28748	3.7901e-13	3.7901e-13	0.34635	0.28748	0	0.334068	0.293311	3.7901e-13	0.316228
EAFLATOXINte		1	1	1	0.987656	1	0.764569	0.680027	0.848627	0.598473	0.594647	0.909091	1	1	0.580073	0.909091	1	0.540185	0.879473	1	0.5		0	0	0	0.0328701	0	0.345435	0.358354	0.311613	0.350697	0.350265	0.28748	3.7901e-13	3.7901e-13	0.34635	0.28748	0	0.334068	0.293311	3.7901e-13	0.316228
EBASTINEOHte		1	1	1	0.987656	1	0.764569	0.680027	0.848627	0.598473	0.594647	0.909091	1	1	0.580073	0.909091	1	0.540185	0.879473	1	0.5		0	0	0	0.0328701	0	0.345435	0.358354	0.311613	0.350697	0.350265	0.28748	3.7901e-13	3.7901e-13	0.34635	0.28748	0	0.334068	0.293311	3.7901e-13	0.316228
EBASTINEte		1	1	1	0.987656	1	0.764569	0.680027	0.848627	0.598473	0.594647	0.909091	1	1	0.580073	0.909091	1	0.540185	0.879473	1	0.5		0	0	0	0.0328701	0	0.345435	0.358354	0.311613	0.350697	0.350265	0.28748	3.7901e-13	3.7901e-13	0.34635	0.28748	0	0.334068	0.293311	3.7901e-13	0.316228
EBP1r		1	1	1	0.987656	1	0.764569	0.680027	0.848627	0.598473	0.594647	0.909091	0.956574	0.956474	0.580073	0.909091	1	0.540185	0.879473	0.956569	0.5		0	0	0	0.0328701	0	0.345435	0.358354	0.311613	0.350697	0.350265	0.28748	0.137325	0.13764	0.34635	0.28748	0	0.334068	0.293311	0.13734	0.316228
EBP2r		1	1	1	0.987656	1	0.764569	0.680027	0.848627	0.598473	0.594647	0.909091	0.956574	0.956474	0.580073	0.909091	1	0.540185	0.879473	0.956569	0.5		0	0	0	0.0328701	0	0.345435	0.358354	0.311613	0.350697	0.350265	0.28748	0.137325	0.13764	0.34635	0.28748	0	0.334068	0.293311	0.13734	0.316228
ECOAH12m		0.968652	0.968652	0.900948	0.942344	0.968652	0.740486	0.638094	0.778399	0.543686	0.586097	0.897168	0.926047	0.926047	0.524362	0.880593	0.968652	0.535012	0.845831	0.926047	0.49715		1.11022e-16	1.11022e-16	0.080977	0.0515983	1.11022e-16	0.334621	0.345666	0.310896	0.327038	0.340514	0.284126	0.134728	0.134728	0.320531	0.278468	1.11022e-16	0.327139	0.288974	0.134728	0.311819
ECOAH1m		1	1	1	0.987656	1	0.764569	0.680027	0.848627	0.598473	0.594647	0.909091	1	1	0.580073	0.909091	1	0.540185	0.879473	1	0.5		0	0	0	0.0328701	0	0.345435	0.358354	0.311613	0.350697	0.350265	0.28748	3.7901e-13	3.7901e-13	0.34635	0.28748	0	0.334068	0.293311	3.7901e-13	0.316228
ECOAH1x		1	1	1	0.987656	1	0.764569	0.680027	0.848627	0.598473	0.594647	0.909091	1	1	0.580073	0.909091	1	0.540185	0.879473	1	0.5		0	0	0	0.0328701	0	0.345435	0.358354	0.311613	0.350697	0.350265	0.28748	3.7901e-13	3.7901e-13	0.34635	0.28748	0	0.334068	0.293311	3.7901e-13	0.316228
ECOAH9m		1	1	1	0.987656	1	0.764569	0.680027	0.848627	0.598473	0.594647	0.909091	1	1	0.580073	0.909091	1	0.540185	0.879473	1	0.5		0	0	0	0.0328701	0	0.345435	0.358354	0.311613	0.350697	0.350265	0.28748	3.7901e-13	3.7901e-13	0.34635	0.28748	0	0.334068	0.293311	3.7901e-13	0.316228
EGMESTr		1	1	1	0.987656	1	0.764569	0.680027	0.848627	0.598473	0.594647	0.909091	1	1	0.580073	0.909091	1	0.540185	0.879473	1	0.5		0	0	0	0.0328701	0	0.345435	0.358354	0.311613	0.350697	0.350265	0.28748	3.7901e-13	3.7901e-13	0.34635	0.28748	0	0.334068	0.293311	3.7901e-13	0.316228
EHGLAT		1	1	1	0.987656	1	0.764569	0.680027	0.848627	0.598473	0.594647	0.909091	1	1	0.580073	0.909091	1	0.540185	0.879473	1	0.5		0	0	0	0.0328701	0	0.345435	0.358354	0.311613	0.350697	0.350265	0.28748	3.7901e-13	3.7901e-13	0.34635	0.28748	0	0.334068	0.293311	3.7901e-13	0.316228
EHGLAT2m		1	1	1	0.987656	1	0.764569	0.680027	0.848627	0.598473	0.594647	0.909091	1	1	0.580073	0.909091	1	0.540185	0.879473	1	0.5		0	0	0	0.0328701	0	0.345435	0.358354	0.311613	0.350697	0.350265	0.28748	3.7901e-13	3.7901e-13	0.34635	0.28748	0	0.334068	0.293311	3.7901e-13	0.316228
EHGLATm		1	1	1	0.987656	1	0.764569	0.680027	0.848627	0.598473	0.594647	0.909091	1	1	0.580073	0.909091	1	0.540185	0.879473	1	0.5		0	0	0	0.0328701	0	0.345435	0.358354	0.311613	0.350697	0.350265	0.28748	3.7901e-13	3.7901e-13	0.34635	0.28748	0	0.334068	0.293311	3.7901e-13	0.316228
EICOSTETCPT1		1	1	1	0.987656	1	0.764569	0.680027	0.848627	0.598473	0.594647	0.909091	1	1	0.580073	0.909091	1	0.540185	0.879473	1	0.5		0	0	0	0.0328701	0	0.345435	0.358354	0.311613	0.350697	0.350265	0.28748	3.7901e-13	3.7901e-13	0.34635	0.28748	0	0.334068	0.293311	3.7901e-13	0.316228
EICOSTETCPT2		1	1	1	0.987656	1	0.764569	0.680027	0.848627	0.598473	0.594647	0.909091	1	1	0.580073	0.909091	1	0.540185	0.879473	1	0.5		0	0	0	0.0328701	0	0.345435	0.358354	0.311613	0.350697	0.350265	0.28748	3.7901e-13	3.7901e-13	0.34635	0.28748	0	0.334068	0.293311	3.7901e-13	0.316228
EICOSTETCRNt		1	1	1	0.987656	1	0.764569	0.680027	0.848627	0.598473	0.594647	0.909091	1	1	0.580073	0.909091	1	0.540185	0.879473	1	0.5		0	0	0	0.0328701	0	0.345435	0.358354	0.311613	0.350697	0.350265	0.28748	3.7901e-13	3.7901e-13	0.34635	0.28748	0	0.334068	0.293311	3.7901e-13	0.316228
EICOSTETt		1	1	1	0.987656	1	0.764569	0.680027	0.848627	0.598473	0.594647	0.909091	1	1	0.580073	0.909091	1	0.540185	0.879473	1	0.5		0	0	0	0.0328701	0	0.345435	0.358354	0.311613	0.350697	0.350265	0.28748	3.7901e-13	3.7901e-13	0.34635	0.28748	0	0.334068	0.293311	3.7901e-13	0.316228
ELAIDCPT1		1	1	1	0.987656	1	0.764569	0.680027	0.848627	0.598473	0.594647	0.909091	1	1	0.580073	0.909091	1	0.540185	0.879473	1	0.5		0	0	0	0.0328701	0	0.345435	0.358354	0.311613	0.350697	0.350265	0.28748	3.7901e-13	3.7901e-13	0.34635	0.28748	0	0.334068	0.293311	3.7901e-13	0.316228
ELAIDCPT2		1	1	1	0.987656	1	0.764569	0.680027	0.848627	0.598473	0.594647	0.909091	1	1	0.580073	0.909091	1	0.540185	0.879473	1	0.5		0	0	0	0.0328701	0	0.345435	0.358354	0.311613	0.350697	0.350265	0.28748	3.7901e-13	3.7901e-13	0.34635	0.28748	0	0.334068	0.293311	3.7901e-13	0.316228
ELAIDCRNt		1	1	1	0.987656	1	0.764569	0.680027	0.848627	0.598473	0.594647	0.909091	1	1	0.580073	0.909091	1	0.540185	0.879473	1	0.5		0	0	0	0.0328701	0	0.345435	0.358354	0.311613	0.350697	0.350265	0.28748	3.7901e-13	3.7901e-13	0.34635	0.28748	0	0.334068	0.293311	3.7901e-13	0.316228
ELAIDt		1	1	1	0.987656	1	0.764569	0.680027	0.848627	0.598473	0.594647	0.909091	0.970258	0.968698	0.580073	0.909091	1	0.540185	0.879473	0.970834	0.5		0	0	0	0.0328701	0	0.345435	0.358354	0.311613	0.350697	0.350265	0.28748	0.0940509	0.0989848	0.34635	0.28748	0	0.334068	0.293311	0.0922295	0.316228
ENGASE		1	1	1	0.987656	1	0.764569	0.680027	0.848627	0.598473	0.594647	0.909091	1	1	0.580073	0.909091	1	0.540185	0.879473	1	0.5		0	0	0	0.0328701	0	0.345435	0.358354	0.311613	0.350697	0.350265	0.28748	3.7901e-13	3.7901e-13	0.34635	0.28748	0	0.334068	0.293311	3.7901e-13	0.316228
ENGASE2		1	1	1	0.987656	1	0.764569	0.680027	0.848627	0.598473	0.594647	0.909091	1	1	0.580073	0.909091	1	0.540185	0.879473	1	0.5		0	0	0	0.0328701	0	0.345435	0.358354	0.311613	0.350697	0.350265	0.28748	3.7901e-13	3.7901e-13	0.34635	0.28748	0	0.334068	0.293311	3.7901e-13	0.316228
ENGASE2ly		1	1	1	0.987656	1	0.764569	0.680027	0.848627	0.598473	0.594647	0.909091	0.954545	0.954545	0.580073	0.909091	1	0.540185	0.879473	0.954545	0.5		0	0	0	0.0328701	0	0.345435	0.358354	0.311613	0.350697	0.350265	0.28748	0.14374	0.14374	0.34635	0.28748	0	0.334068	0.293311	0.14374	0.316228
ENMAN1g		1	1	1	0.987656	1	0.764569	0.680027	0.848627	0.598473	0.594647	0.909091	1	1	0.580073	0.909091	1	0.540185	0.879473	1	0.5		0	0	0	0.0328701	0	0.345435	0.358354	0.311613	0.350697	0.350265	0.28748	3.7901e-13	3.7901e-13	0.34635	0.28748	0	0.334068	0.293311	3.7901e-13	0.316228
ENMAN2g		1	1	1	0.987656	1	0.764569	0.680027	0.848627	0.598473	0.594647	0.909091	1	1	0.580073	0.909091	1	0.540185	0.879473	1	0.5		0	0	0	0.0328701	0	0.345435	0.358354	0.311613	0.350697	0.350265	0.28748	3.7901e-13	3.7901e-13	0.34635	0.28748	0	0.334068	0.293311	3.7901e-13	0.316228
ENMAN3g		1	1	1	0.987656	1	0.764569	0.680027	0.848627	0.598473	0.594647	0.909091	1	1	0.580073	0.909091	1	0.540185	0.879473	1	0.5		0	0	0	0.0328701	0	0.345435	0.358354	0.311613	0.350697	0.350265	0.28748	3.7901e-13	3.7901e-13	0.34635	0.28748	0	0.334068	0.293311	3.7901e-13	0.316228
ENMAN4g		1	1	1	0.987656	1	0.764569	0.680027	0.848627	0.598473	0.594647	0.909091	1	1	0.580073	0.909091	1	0.540185	0.879473	1	0.5		0	0	0	0.0328701	0	0.345435	0.358354	0.311613	0.350697	0.350265	0.28748	3.7901e-13	3.7901e-13	0.34635	0.28748	0	0.334068	0.293311	3.7901e-13	0.316228
ENMAN5g		1	1	1	0.987656	1	0.764569	0.680027	0.848627	0.598473	0.594647	0.909091	1	1	0.580073	0.909091	1	0.540185	0.879473	1	0.5		0	0	0	0.0328701	0	0.345435	0.358354	0.311613	0.350697	0.350265	0.28748	3.7901e-13	3.7901e-13	0.34635	0.28748	0	0.334068	0.293311	3.7901e-13	0.316228
ENMAN6g		1	1	1	0.987656	1	0.764569	0.680027	0.848627	0.598473	0.594647	0.909091	1	1	0.580073	0.909091	1	0.540185	0.879473	1	0.5		0	0	0	0.0328701	0	0.345435	0.358354	0.311613	0.350697	0.350265	0.28748	3.7901e-13	3.7901e-13	0.34635	0.28748	0	0.334068	0.293311	3.7901e-13	0.316228
ENO		1	1	1	0.987656	1	0.764569	0.680027	0.837254	0.598473	0.594647	0.905241	0.954545	0.954545	0.580073	0.909091	1	0.540185	0.879473	0.954545	0.5		0	0	0	0.0328701	0	0.345435	0.358354	0.321357	0.350697	0.350265	0.286519	0.14374	0.14374	0.34635	0.28748	0	0.334068	0.293311	0.14374	0.316228
ESTRADIOLGLCt		1	1	1	0.987656	1	0.764569	0.680027	0.848627	0.598473	0.594647	0.909091	0.954545	0.954545	0.580073	0.909091	1	0.540185	0.879473	0.954545	0.5		0	0	0	0.0328701	0	0.345435	0.358354	0.311613	0.350697	0.350265	0.28748	0.14374	0.14374	0.34635	0.28748	0	0.334068	0.293311	0.14374	0.316228
ESTRADIOLGLCt2		1	1	1	0.987656	1	0.764569	0.680027	0.848627	0.598473	0.594647	0.909091	0.954545	0.954545	0.580073	0.909091	1	0.540185	0.879473	0.954545	0.5		0	0	0	0.0328701	0	0.345435	0.358354	0.311613	0.350697	0.350265	0.28748	0.14374	0.14374	0.34635	0.28748	0	0.334068	0.293311	0.14374	0.316228
ESTRADIOLGLCtr		1	1	1	0.987656	1	0.764569	0.680027	0.848627	0.598473	0.594647	0.909091	1	1	0.580073	0.909091	1	0.540185	0.879473	1	0.5		0	0	0	0.0328701	0	0.345435	0.358354	0.311613	0.350697	0.350265	0.28748	3.7901e-13	3.7901e-13	0.34635	0.28748	0	0.334068	0.293311	3.7901e-13	0.316228
ESTRADIOLt		1	1	1	0.987656	1	0.764569	0.680027	0.848627	0.598473	0.594647	0.909091	1	1	0.580073	0.909091	1	0.540185	0.879473	1	0.5		0	0	0	0.0328701	0	0.345435	0.358354	0.311613	0.350697	0.350265	0.28748	3.7901e-13	3.7901e-13	0.34635	0.28748	0	0.334068	0.293311	3.7901e-13	0.316228
ESTRADIOLtr		1	1	1	0.987656	1	0.764569	0.680027	0.848627	0.598473	0.594647	0.909091	1	1	0.580073	0.909091	1	0.540185	0.879473	1	0.5		0	0	0	0.0328701	0	0.345435	0.358354	0.311613	0.350697	0.350265	0.28748	3.7901e-13	3.7901e-13	0.34635	0.28748	0	0.334068	0.293311	3.7901e-13	0.316228
ESTRIOLGLCte		1	1	1	0.987656	1	0.764569	0.680027	0.848627	0.598473	0.594647	0.909091	1	1	0.580073	0.909091	1	0.540185	0.879473	1	0.5		0	0	0	0.0328701	0	0.345435	0.358354	0.311613	0.350697	0.350265	0.28748	3.7901e-13	3.7901e-13	0.34635	0.28748	0	0.334068	0.293311	3.7901e-13	0.316228
ESTRIOLGLCtr		1	1	1	0.987656	1	0.764569	0.680027	0.848627	0.598473	0.594647	0.909091	1	1	0.580073	0.909091	1	0.540185	0.879473	1	0.5		0	0	0	0.0328701	0	0.345435	0.358354	0.311613	0.350697	0.350265	0.28748	3.7901e-13	3.7901e-13	0.34635	0.28748	0	0.334068	0.293311	3.7901e-13	0.316228
ESTRONEGLCt		1	1	1	0.987656	1	0.764569	0.680027	0.848627	0.598473	0.594647	0.909091	1	1	0.580073	0.909091	1	0.540185	0.879473	1	0.5		0	0	0	0.0328701	0	0.345435	0.358354	0.311613	0.350697	0.350265	0.28748	3.7901e-13	3.7901e-13	0.34635	0.28748	0	0.334068	0.293311	3.7901e-13	0.316228
ESTRONEGLCtr		1	1	1	0.987656	1	0.764569	0.680027	0.848627	0.598473	0.594647	0.909091	1	1	0.580073	0.909091	1	0.540185	0.879473	1	0.5		0	0	0	0.0328701	0	0.345435	0.358354	0.311613	0.350697	0.350265	0.28748	3.7901e-13	3.7901e-13	0.34635	0.28748	0	0.334068	0.293311	3.7901e-13	0.316228
ESTRONESt		1	1	1	0.987656	1	0.764569	0.680027	0.848627	0.598473	0.594647	0.909091	1	1	0.580073	0.909091	1	0.540185	0.879473	1	0.5		0	0	0	0.0328701	0	0.345435	0.358354	0.311613	0.350697	0.350265	0.28748	3.7901e-13	3.7901e-13	0.34635	0.28748	0	0.334068	0.293311	3.7901e-13	0.316228
ESTRONESt2		1	1	1	0.987656	1	0.764569	0.680027	0.848627	0.598473	0.594647	0.909091	1	1	0.580073	0.909091	1	0.540185	0.879473	1	0.5		0	0	0	0.0328701	0	0.345435	0.358354	0.311613	0.350697	0.350265	0.28748	3.7901e-13	3.7901e-13	0.34635	0.28748	0	0.334068	0.293311	3.7901e-13	0.316228
ESTRONEtr		1	1	1	0.987656	1	0.764569	0.680027	0.848627	0.598473	0.594647	0.909091	1	1	0.580073	0.909091	1	0.540185	0.879473	1	0.5		0	0	0	0.0328701	0	0.345435	0.358354	0.311613	0.350697	0.350265	0.28748	3.7901e-13	3.7901e-13	0.34635	0.28748	0	0.334068	0.293311	3.7901e-13	0.316228
ESTSULT		1	1	1	0.987656	1	0.764569	0.680027	0.848627	0.598473	0.594647	0.909091	0.954545	0.954545	0.580073	0.909091	1	0.540185	0.879473	0.954545	0.5		0	0	0	0.0328701	0	0.345435	0.358354	0.311613	0.350697	0.350265	0.28748	0.14374	0.14374	0.34635	0.28748	0	0.334068	0.293311	0.14374	0.316228
ETF		1	1	1	0.987656	1	0.764569	0.680027	0.835745	0.598473	0.594647	0.909091	0.954545	0.954545	0.580073	0.909091	1	0.540185	0.879473	0.954545	0.5		0	0	0	0.0328701	0	0.345435	0.358354	0.317345	0.350697	0.350265	0.28748	0.14374	0.14374	0.34635	0.28748	0	0.334068	0.293311	0.14374	0.316228
ETFQO		1	1	1	0.987656	1	0.764569	0.680027	0.835745	0.598473	0.594647	0.909091	0.954545	0.954545	0.580073	0.909091	1	0.540185	0.879473	0.954545	0.5		0	0	0	0.0328701	0	0.345435	0.358354	0.317345	0.350697	0.350265	0.28748	0.14374	0.14374	0.34635	0.28748	0	0.334068	0.293311	0.14374	0.316228
ETHAK		1	1	1	0.987656	1	0.764569	0.680027	0.848627	0.598473	0.594647	0.909091	0.954545	0.954545	0.580073	0.909091	1	0.540185	0.879473	0.954545	0.5		0	0	0	0.0328701	0	0.345435	0.358354	0.311613	0.350697	0.350265	0.28748	0.14374	0.14374	0.34635	0.28748	0	0.334068	0.293311	0.14374	0.316228
ETHP		1	1	1	0.987656	1	0.764569	0.680027	0.848627	0.598473	0.594647	0.909091	0.954545	0.954545	0.580073	0.909091	1	0.540185	0.879473	0.954545	0.5		0	0	0	0.0328701	0	0.345435	0.358354	0.311613	0.350697	0.350265	0.28748	0.14374	0.14374	0.34635	0.28748	0	0.334068	0.293311	0.14374	0.316228
ETOHMO		1	1	1	0.987656	1	0.764569	0.680027	0.848627	0.598473	0.594647	0.909091	1	1	0.580073	0.909091	1	0.540185	0.879473	1	0.5		0	0	0	0.0328701	0	0.345435	0.358354	0.311613	0.350697	0.350265	0.28748	3.7901e-13	3.7901e-13	0.34635	0.28748	0	0.334068	0.293311	3.7901e-13	0.316228
ETOHt		1	1	1	0.987656	1	0.764569	0.680027	0.848627	0.598473	0.594647	0.909091	1	1	0.580073	0.909091	1	0.540185	0.879473	1	0.5		0	0	0	0.0328701	0	0.345435	0.358354	0.311613	0.350697	0.350265	0.28748	3.7901e-13	3.7901e-13	0.34635	0.28748	0	0.334068	0.293311	3.7901e-13	0.316228
ETOHtx		1	1	1	0.987656	1	0.764569	0.680027	0.848627	0.598473	0.594647	0.909091	1	1	0.580073	0.909091	1	0.540185	0.879473	1	0.5		0	0	0	0.0328701	0	0.345435	0.358354	0.311613	0.350697	0.350265	0.28748	3.7901e-13	3.7901e-13	0.34635	0.28748	0	0.334068	0.293311	3.7901e-13	0.316228
EX_10fthf(e)		1	1	1	0.987656	1	0.764569	0.680027	0.848627	0.598473	0.594647	0.909091	1	1	0.580073	0.909091	1	0.540185	0.879473	1	0.5		0	0	0	0.0328701	0	0.345435	0.358354	0.311613	0.350697	0.350265	0.28748	3.7901e-13	3.7901e-13	0.34635	0.28748	0	0.334068	0.293311	3.7901e-13	0.316228
EX_10fthf5glu(e)		1	1	1	0.987656	1	0.764569	0.680027	0.848627	0.598473	0.594647	0.909091	1	1	0.580073	0.909091	1	0.540185	0.879473	1	0.5		0	0	0	0.0328701	0	0.345435	0.358354	0.311613	0.350697	0.350265	0.28748	3.7901e-13	3.7901e-13	0.34635	0.28748	0	0.334068	0.293311	3.7901e-13	0.316228
EX_10fthf6glu(e)		1	1	1	0.987656	1	0.764569	0.680027	0.848627	0.598473	0.594647	0.909091	1	1	0.580073	0.909091	1	0.540185	0.879473	1	0.5		0	0	0	0.0328701	0	0.345435	0.358354	0.311613	0.350697	0.350265	0.28748	3.7901e-13	3.7901e-13	0.34635	0.28748	0	0.334068	0.293311	3.7901e-13	0.316228
EX_10fthf7glu(e)		1	1	1	0.987656	1	0.764569	0.680027	0.848627	0.598473	0.594647	0.909091	1	1	0.580073	0.909091	1	0.540185	0.879473	1	0.5		0	0	0	0.0328701	0	0.345435	0.358354	0.311613	0.350697	0.350265	0.28748	3.7901e-13	3.7901e-13	0.34635	0.28748	0	0.334068	0.293311	3.7901e-13	0.316228
EX_11-cis-retfa(e)		1	1	1	0.987656	1	0.764569	0.680027	0.848627	0.598473	0.594647	0.909091	1	1	0.580073	0.909091	1	0.540185	0.879473	1	0.5		0	0	0	0.0328701	0	0.345435	0.358354	0.311613	0.350697	0.350265	0.28748	3.7901e-13	3.7901e-13	0.34635	0.28748	0	0.334068	0.293311	3.7901e-13	0.316228
EX_13-cis-retnglc(e)		1	1	1	0.987656	1	0.764569	0.680027	0.848627	0.598473	0.594647	0.909091	1	1	0.580073	0.909091	1	0.540185	0.879473	1	0.5		0	0	0	0.0328701	0	0.345435	0.358354	0.311613	0.350697	0.350265	0.28748	3.7901e-13	3.7901e-13	0.34635	0.28748	0	0.334068	0.293311	3.7901e-13	0.316228
EX_1glyc_hs(e)		1	1	1	0.987656	1	0.764569	0.680027	0.848627	0.598473	0.594647	0.909091	0.957467	0.967458	0.580073	0.909091	1	0.540185	0.879473	0.954545	0.5		0	0	0	0.0328701	0	0.345435	0.358354	0.311613	0.350697	0.350265	0.28748	0.134502	0.102906	0.34635	0.28748	0	0.334068	0.293311	0.14374	0.316228
EX_1mncam(e)		1	1	1	0.987656	1	0.764569	0.680027	0.848627	0.598473	0.594647	0.909091	1	1	0.580073	0.909091	1	0.540185	0.879473	1	0.5		0	0	0	0.0328701	0	0.345435	0.358354	0.311613	0.350697	0.350265	0.28748	3.7901e-13	3.7901e-13	0.34635	0.28748	0	0.334068	0.293311	3.7901e-13	0.316228
EX_2425dhvitd2(e)		1	1	1	0.987656	1	0.764569	0.680027	0.848627	0.598473	0.594647	0.909091	1	1	0.580073	0.909091	1	0.540185	0.879473	1	0.5		0	0	0	0.0328701	0	0.345435	0.358354	0.311613	0.350697	0.350265	0.28748	3.7901e-13	3.7901e-13	0.34635	0.28748	0	0.334068	0.293311	3.7901e-13	0.316228
EX_2425dhvitd3(e)		1	1	1	0.987656	1	0.764569	0.680027	0.848627	0.598473	0.594647	0.909091	0.956761	0.956593	0.580073	0.909091	1	0.540185	0.879473	0.956761	0.5		0	0	0	0.0328701	0	0.345435	0.358354	0.311613	0.350697	0.350265	0.28748	0.136735	0.137266	0.34635	0.28748	0	0.334068	0.293311	0.136735	0.316228
EX_24nph(e)		1	1	1	0.987656	1	0.764569	0.680027	0.848627	0.598473	0.594647	0.909091	1	1	0.580073	0.909091	1	0.540185	0.879473	1	0.5		0	0	0	0.0328701	0	0.345435	0.358354	0.311613	0.350697	0.350265	0.28748	3.7901e-13	3.7901e-13	0.34635	0.28748	0	0.334068	0.293311	3.7901e-13	0.316228
EX_25hvitd2(e)		1	1	1	0.987656	1	0.764569	0.680027	0.848627	0.598473	0.594647	0.909091	1	1	0.580073	0.909091	1	0.540185	0.879473	1	0.5		0	0	0	0.0328701	0	0.345435	0.358354	0.311613	0.350697	0.350265	0.28748	3.7901e-13	3.7901e-13	0.34635	0.28748	0	0.334068	0.293311	3.7901e-13	0.316228
EX_25hvitd3(e)		1	1	1	0.987656	1	0.764569	0.680027	0.848627	0.598473	0.594647	0.909091	0.956664	0.956536	0.580073	0.909091	1	0.540185	0.879473	0.956664	0.5		0	0	0	0.0328701	0	0.345435	0.358354	0.311613	0.350697	0.350265	0.28748	0.137039	0.137445	0.34635	0.28748	0	0.334068	0.293311	0.137039	0.316228
EX_2hb(e)		0.976989	0.976989	0.989541	0.950323	0.976989	0.746858	0.643397	0.784698	0.548035	0.588371	0.902815	0.933627	0.933627	0.528531	0.888172	0.976989	0.536528	0.853055	0.933627	0.497908		2.22045e-16	2.22045e-16	0.0114576	0.0522415	2.14341e-16	0.337501	0.348635	0.313723	0.329744	0.343079	0.285672	0.137125	0.137125	0.32316	0.280865	2.14341e-16	0.329145	0.291512	0.137125	0.312973
EX_2mcit(e)		0.976989	0.976989	0.989541	0.950323	0.976989	0.746858	0.643397	0.784698	0.548035	0.588371	0.902815	0.933627	0.933627	0.528531	0.888172	0.976989	0.536528	0.853055	0.933627	0.497908		2.22045e-16	2.22045e-16	0.0114576	0.0522415	2.14341e-16	0.337501	0.348635	0.313723	0.329744	0.343079	0.285672	0.137125	0.137125	0.32316	0.280865	2.22045e-16	0.329145	0.291512	0.137125	0.312973
EX_35cgmp(e)		1	1	1	0.987656	1	0.764569	0.680027	0.815713	0.590283	0.594647	0.909091	0.954545	0.954545	0.571045	0.909091	1	0.540185	0.876902	0.954545	0.5		0	0	0	0.0328701	0	0.345435	0.358354	0.32077	0.348784	0.350265	0.28748	0.14374	0.14374	0.343571	0.28748	0	0.334068	0.295217	0.14374	0.316228
EX_3aib(e)		0.968652	0.968652	0.985751	0.965202	0.968652	0.740486	0.638094	0.778399	0.543686	0.586097	0.900541	0.926047	0.926047	0.524362	0.880593	0.968652	0.535012	0.845831	0.926047	0.49715		1.11022e-16	1.11022e-16	0.0156091	0.0267638	1.11022e-16	0.334621	0.345666	0.310896	0.327038	0.340514	0.285105	0.134728	0.134728	0.320531	0.278468	1.11022e-16	0.327139	0.288974	0.134728	0.311819
EX_3mlda(e)		1	1	1	0.987656	1	0.764569	0.658227	0.802201	0.56028	0.594647	0.909091	0.954545	0.954545	0.540267	0.909091	1	0.540185	0.873021	0.954545	0.5		0	0	0	0.0328701	0	0.345435	0.356873	0.321534	0.33733	0.350265	0.28748	0.14374	0.14374	0.330521	0.28748	0	0.334068	0.298491	0.14374	0.316228
EX_4abut(e)		1	1	1	0.987656	1	0.764569	0.680027	0.815713	0.594896	0.594647	0.909091	0.954545	0.954545	0.574997	0.909091	1	0.540185	0.877224	0.954545	0.5		0	0	0	0.0328701	0	0.345435	0.358354	0.32077	0.35218	0.350265	0.28748	0.14374	0.14374	0.347278	0.28748	0	0.334068	0.294967	0.14374	0.316228
EX_4hdebrisoquine(e)		1	1	1	0.987656	1	0.764569	0.680027	0.848627	0.598473	0.594647	0.909091	1	1	0.580073	0.909091	1	0.540185	0.879473	1	0.5		0	0	0	0.0328701	0	0.345435	0.358354	0.311613	0.350697	0.350265	0.28748	3.7901e-13	3.7901e-13	0.34635	0.28748	0	0.334068	0.293311	3.7901e-13	0.316228
EX_4hphac(e)		1	1	1	0.987444	1	0.764569	0.680027	0.81919	0.598473	0.594647	0.909091	0.954545	0.954545	0.580073	0.909091	1	0.540185	0.878236	0.954545	0.5		0	0	0	0.0332146	0	0.345435	0.358354	0.320104	0.350697	0.350265	0.28748	0.14374	0.14374	0.34635	0.28748	0	0.334068	0.294202	0.14374	0.316228
EX_4mptnl(e)		1	1	1	0.987656	1	0.764569	0.680027	0.848627	0.598473	0.594647	0.909091	1	1	0.580073	0.909091	1	0.540185	0.879473	1	0.5		0	0	0	0.0328701	0	0.345435	0.358354	0.311613	0.350697	0.350265	0.28748	3.7901e-13	3.7901e-13	0.34635	0.28748	0	0.334068	0.293311	3.7901e-13	0.316228
EX_4nph(e)		1	1	1	0.987656	1	0.764569	0.680027	0.848627	0.598473	0.594647	0.909091	1	1	0.580073	0.909091	1	0.540185	0.879473	1	0.5		0	0	0	0.0328701	0	0.345435	0.358354	0.311613	0.350697	0.350265	0.28748	3.7901e-13	3.7901e-13	0.34635	0.28748	0	0.334068	0.293311	3.7901e-13	0.316228
EX_4nphsf(e)		1	1	1	0.987656	1	0.764569	0.680027	0.848627	0.598473	0.594647	0.909091	1	1	0.580073	0.909091	1	0.540185	0.879473	1	0.5		0	0	0	0.0328701	0	0.345435	0.358354	0.311613	0.350697	0.350265	0.28748	3.7901e-13	3.7901e-13	0.34635	0.28748	0	0.334068	0.293311	3.7901e-13	0.316228
EX_4pyrdx(e)		1	1	1	0.987656	1	0.764569	0.680027	0.848627	0.598473	0.594647	0.909091	1	1	0.580073	0.909091	1	0.540185	0.879473	1	0.5		0	0	0	0.0328701	0	0.345435	0.358354	0.311613	0.350697	0.350265	0.28748	3.7901e-13	3.7901e-13	0.34635	0.28748	0	0.334068	0.293311	3.7901e-13	0.316228
EX_5adtststerone(e)		1	1	1	0.987656	1	0.764569	0.680027	0.848627	0.598473	0.594647	0.909091	1	1	0.580073	0.909091	1	0.540185	0.879473	1	0.5		0	0	0	0.0328701	0	0.345435	0.358354	0.311613	0.350697	0.350265	0.28748	3.7901e-13	3.7901e-13	0.34635	0.28748	0	0.334068	0.293311	3.7901e-13	0.316228
EX_5adtststeroneglc(e)		1	1	1	0.987656	1	0.764569	0.680027	0.848627	0.598473	0.594647	0.909091	1	1	0.580073	0.909091	1	0.540185	0.879473	1	0.5		0	0	0	0.0328701	0	0.345435	0.358354	0.311613	0.350697	0.350265	0.28748	3.7901e-13	3.7901e-13	0.34635	0.28748	0	0.334068	0.293311	3.7901e-13	0.316228
EX_5dhf(e)		1	1	1	0.987656	1	0.764569	0.680027	0.848627	0.598473	0.594647	0.909091	1	1	0.580073	0.909091	1	0.540185	0.879473	1	0.5		0	0	0	0.0328701	0	0.345435	0.358354	0.311613	0.350697	0.350265	0.28748	3.7901e-13	3.7901e-13	0.34635	0.28748	0	0.334068	0.293311	3.7901e-13	0.316228
EX_5fthf(e)		1	1	1	0.987656	1	0.764569	0.680027	0.848627	0.598473	0.594647	0.909091	1	1	0.580073	0.909091	1	0.540185	0.879473	1	0.5		0	0	0	0.0328701	0	0.345435	0.358354	0.311613	0.350697	0.350265	0.28748	3.7901e-13	3.7901e-13	0.34635	0.28748	0	0.334068	0.293311	3.7901e-13	0.316228
EX_5htrp(e)		1	1	1	0.987656	1	0.764569	0.680027	0.822418	0.598473	0.594647	0.909091	0.954545	0.954545	0.580073	0.909091	1	0.540185	0.879473	0.954545	0.5		0	0	0	0.0328701	0	0.345435	0.358354	0.319595	0.350697	0.350265	0.28748	0.14374	0.14374	0.34635	0.28748	0	0.334068	0.293311	0.14374	0.316228
EX_5mthf(e)		1	1	1	0.987656	1	0.764569	0.680027	0.848627	0.598473	0.594647	0.909091	1	1	0.580073	0.909091	1	0.540185	0.879473	1	0.5		0	0	0	0.0328701	0	0.345435	0.358354	0.311613	0.350697	0.350265	0.28748	3.7901e-13	3.7901e-13	0.34635	0.28748	0	0.334068	0.293311	3.7901e-13	0.316228
EX_5thf(e)		1	1	1	0.987656	1	0.764569	0.680027	0.848627	0.598473	0.594647	0.909091	1	1	0.580073	0.909091	1	0.540185	0.879473	1	0.5		0	0	0	0.0328701	0	0.345435	0.358354	0.311613	0.350697	0.350265	0.28748	3.7901e-13	3.7901e-13	0.34635	0.28748	0	0.334068	0.293311	3.7901e-13	0.316228
EX_6dhf(e)		1	1	1	0.987656	1	0.764569	0.680027	0.848627	0.598473	0.594647	0.909091	1	1	0.580073	0.909091	1	0.540185	0.879473	1	0.5		0	0	0	0.0328701	0	0.345435	0.358354	0.311613	0.350697	0.350265	0.28748	3.7901e-13	3.7901e-13	0.34635	0.28748	0	0.334068	0.293311	3.7901e-13	0.316228
EX_6htststerone(e)		1	1	1	0.987656	1	0.764569	0.680027	0.848627	0.598473	0.594647	0.909091	1	1	0.580073	0.909091	1	0.540185	0.879473	1	0.5		0	0	0	0.0328701	0	0.345435	0.358354	0.311613	0.350697	0.350265	0.28748	3.7901e-13	3.7901e-13	0.34635	0.28748	0	0.334068	0.293311	3.7901e-13	0.316228
EX_6thf(e)		1	1	1	0.987656	1	0.764569	0.680027	0.848627	0.598473	0.594647	0.909091	1	1	0.580073	0.909091	1	0.540185	0.879473	1	0.5		0	0	0	0.0328701	0	0.345435	0.358354	0.311613	0.350697	0.350265	0.28748	3.7901e-13	3.7901e-13	0.34635	0.28748	0	0.334068	0.293311	3.7901e-13	0.316228
EX_7dhf(e)		1	1	1	0.987656	1	0.764569	0.680027	0.848627	0.598473	0.594647	0.909091	1	1	0.580073	0.909091	1	0.540185	0.879473	1	0.5		0	0	0	0.0328701	0	0.345435	0.358354	0.311613	0.350697	0.350265	0.28748	3.7901e-13	3.7901e-13	0.34635	0.28748	0	0.334068	0.293311	3.7901e-13	0.316228
EX_7thf(e)		1	1	1	0.987656	1	0.764569	0.680027	0.848627	0.598473	0.594647	0.909091	1	1	0.580073	0.909091	1	0.540185	0.879473	1	0.5		0	0	0	0.0328701	0	0.345435	0.358354	0.311613	0.350697	0.350265	0.28748	3.7901e-13	3.7901e-13	0.34635	0.28748	0	0.334068	0.293311	3.7901e-13	0.316228
EX_9-cis-retfa(e)		1	1	1	0.987656	1	0.764569	0.680027	0.848627	0.598473	0.594647	0.909091	1	1	0.580073	0.909091	1	0.540185	0.879473	1	0.5		0	0	0	0.0328701	0	0.345435	0.358354	0.311613	0.350697	0.350265	0.28748	3.7901e-13	3.7901e-13	0.34635	0.28748	0	0.334068	0.293311	3.7901e-13	0.316228
EX_CLPND(e)		1	1	1	0.987656	1	0.764569	0.680027	0.848627	0.598473	0.594647	0.909091	1	1	0.580073	0.909091	1	0.540185	0.879473	1	0.5		0	0	0	0.0328701	0	0.345435	0.358354	0.311613	0.350697	0.350265	0.28748	3.7901e-13	3.7901e-13	0.34635	0.28748	0	0.334068	0.293311	3.7901e-13	0.316228
EX_Lcystin(e)		1	1	1	0.987656	1	0.764569	0.680027	0.848627	0.598473	0.594647	0.909091	1	1	0.580073	0.909091	1	0.540185	0.879473	1	0.5		0	0	0	0.0328701	0	0.345435	0.358354	0.311613	0.350697	0.350265	0.28748	3.7901e-13	3.7901e-13	0.34635	0.28748	0	0.334068	0.293311	3.7901e-13	0.316228
EX_Rtotal(e)		1	1	1	0.987656	1	0.764569	0.680027	0.848627	0.598473	0.594647	0.909091	0.954545	0.958338	0.580073	0.909091	1	0.540185	0.879473	0.979304	0.5		0	0	0	0.0328701	0	0.345435	0.358354	0.311613	0.350697	0.350265	0.28748	0.14374	0.131747	0.34635	0.28748	0	0.334068	0.293311	0.0654457	0.316228
EX_Rtotal2(e)		1	1	1	0.987656	1	0.764569	0.680027	0.848627	0.598473	0.594647	0.909091	0.954545	0.958338	0.580073	0.909091	1	0.540185	0.879473	0.979304	0.5		0	0	0	0.0328701	0	0.345435	0.358354	0.311613	0.350697	0.350265	0.28748	0.14374	0.131747	0.34635	0.28748	0	0.334068	0.293311	0.0654457	0.316228
EX_Rtotal3(e)		1	1	1	0.987656	1	0.764569	0.680027	0.848627	0.598473	0.594647	0.909091	0.954545	0.958338	0.580073	0.909091	1	0.540185	0.879473	0.979304	0.5		0	0	0	0.0328701	0	0.345435	0.358354	0.311613	0.350697	0.350265	0.28748	0.14374	0.131747	0.34635	0.28748	0	0.334068	0.293311	0.0654457	0.316228
EX_Tyr-ggn(e)		1	1	1	0.987656	1	0.764569	0.680027	0.848627	0.598473	0.594647	0.909091	1	1	0.580073	0.909091	1	0.540185	0.879473	1	0.5		0	0	0	0.0328701	0	0.345435	0.358354	0.311613	0.350697	0.350265	0.28748	3.7901e-13	3.7901e-13	0.34635	0.28748	0	0.334068	0.293311	3.7901e-13	0.316228
EX_abt(e)		1	1	1	0.987656	1	0.764569	0.680027	0.848627	0.598473	0.594647	0.909091	0.958199	0.958199	0.580073	0.909091	1	0.540185	0.879473	0.958199	0.5		0	0	0	0.0328701	0	0.345435	0.358354	0.311613	0.350697	0.350265	0.28748	0.132186	0.132186	0.34635	0.28748	0	0.334068	0.293311	0.132186	0.316228
EX_ac(e)		1	1	1	0.987656	1	0.764569	0.680027	0.848627	0.598473	0.594647	0.909091	0.958363	0.957389	0.580073	0.909091	1	0.540185	0.879473	0.954545	0.5		0	0	0	0.0328701	0	0.345435	0.358354	0.311613	0.350697	0.350265	0.28748	0.131668	0.134747	0.34635	0.28748	0	0.334068	0.293311	0.14374	0.316228
EX_acac(e)		1	1	1	0.987656	1	0.764569	0.680027	0.848627	0.598473	0.594647	0.909091	0.954545	0.954545	0.580073	0.909091	1	0.540185	0.879473	0.954545	0.5		0	0	0	0.0328701	0	0.345435	0.358354	0.311613	0.350697	0.350265	0.28748	0.14374	0.14374	0.34635	0.28748	0	0.334068	0.293311	0.14374	0.316228
EX_acald(e)		1	1	1	0.987656	1	0.764569	0.680027	0.848627	0.598473	0.594647	0.909091	1	1	0.580073	0.909091	1	0.540185	0.879473	1	0.5		0	0	0	0.0328701	0	0.345435	0.358354	0.311613	0.350697	0.350265	0.28748	3.7901e-13	3.7901e-13	0.34635	0.28748	0	0.334068	0.293311	3.7901e-13	0.316228
EX_acetone(e)		1	1	1	0.987656	1	0.764569	0.680027	0.848627	0.598473	0.594647	0.909091	0.954545	0.954545	0.580073	0.909091	1	0.540185	0.879473	0.954545	0.5		0	0	0	0.0328701	0	0.345435	0.358354	0.311613	0.350697	0.350265	0.28748	0.14374	0.14374	0.34635	0.28748	0	0.334068	0.293311	0.14374	0.316228
EX_acgalfucgalacgalfuc12gal14acglcgalgluside_hs(e)		1	1	1	0.987656	1	0.764569	0.680027	0.848627	0.598473	0.594647	0.909091	1	1	0.580073	0.909091	1	0.540185	0.879473	1	0.5		0	0	0	0.0328701	0	0.345435	0.358354	0.311613	0.350697	0.350265	0.28748	3.7901e-13	3.7901e-13	0.34635	0.28748	0	0.334068	0.293311	3.7901e-13	0.316228
EX_acgalfucgalacgalfucgalacglcgal14acglcgalgluside_hs(e)		1	1	1	0.987656	1	0.764569	0.680027	0.848627	0.598473	0.594647	0.909091	1	1	0.580073	0.909091	1	0.540185	0.879473	1	0.5		0	0	0	0.0328701	0	0.345435	0.358354	0.311613	0.350697	0.350265	0.28748	3.7901e-13	3.7901e-13	0.34635	0.28748	0	0.334068	0.293311	3.7901e-13	0.316228
EX_acgam(e)		1	1	1	0.987656	1	0.764569	0.680027	0.848627	0.598473	0.594647	0.909091	1	1	0.580073	0.909091	1	0.540185	0.879473	1	0.5		0	0	0	0.0328701	0	0.345435	0.358354	0.311613	0.350697	0.350265	0.28748	3.7901e-13	3.7901e-13	0.34635	0.28748	0	0.334068	0.293311	3.7901e-13	0.316228
EX_ach(e)		1	1	1	0.987656	1	0.764569	0.680027	0.848627	0.598473	0.594647	0.909091	1	1	0.580073	0.909091	1	0.540185	0.879473	1	0.5		0	0	0	0.0328701	0	0.345435	0.358354	0.311613	0.350697	0.350265	0.28748	3.7901e-13	3.7901e-13	0.34635	0.28748	0	0.334068	0.293311	3.7901e-13	0.316228
EX_acn13acngalgbside_hs(e)		1	1	1	0.987656	1	0.764569	0.680027	0.848627	0.598473	0.594647	0.909091	1	1	0.580073	0.909091	1	0.540185	0.879473	1	0.5		0	0	0	0.0328701	0	0.345435	0.358354	0.311613	0.350697	0.350265	0.28748	3.7901e-13	3.7901e-13	0.34635	0.28748	0	0.334068	0.293311	3.7901e-13	0.316228
EX_acn23acngalgbside_hs(e)		1	1	1	0.987656	1	0.764569	0.680027	0.848627	0.598473	0.594647	0.909091	1	1	0.580073	0.909091	1	0.540185	0.879473	1	0.5		0	0	0	0.0328701	0	0.345435	0.358354	0.311613	0.350697	0.350265	0.28748	3.7901e-13	3.7901e-13	0.34635	0.28748	0	0.334068	0.293311	3.7901e-13	0.316228
EX_acnacngal14acglcgalgluside_hs(e)		1	1	1	0.987656	1	0.764569	0.680027	0.848627	0.598473	0.594647	0.909091	1	1	0.580073	0.909091	1	0.540185	0.879473	1	0.5		0	0	0	0.0328701	0	0.345435	0.358354	0.311613	0.350697	0.350265	0.28748	3.7901e-13	3.7901e-13	0.34635	0.28748	0	0.334068	0.293311	3.7901e-13	0.316228
EX_acnacngalgbside_hs(e)		1	1	1	0.987656	1	0.764569	0.680027	0.848627	0.598473	0.594647	0.909091	1	1	0.580073	0.909091	1	0.540185	0.879473	1	0.5		0	0	0	0.0328701	0	0.345435	0.358354	0.311613	0.350697	0.350265	0.28748	3.7901e-13	3.7901e-13	0.34635	0.28748	0	0.334068	0.293311	3.7901e-13	0.316228
EX_acngalacglcgal14acglcgalgluside_hs(e)		1	1	1	0.987656	1	0.764569	0.680027	0.848627	0.598473	0.594647	0.909091	1	1	0.580073	0.909091	1	0.540185	0.879473	1	0.5		0	0	0	0.0328701	0	0.345435	0.358354	0.311613	0.350697	0.350265	0.28748	3.7901e-13	3.7901e-13	0.34635	0.28748	0	0.334068	0.293311	3.7901e-13	0.316228
EX_ade(e)		1	1	1	0.987656	1	0.764569	0.680027	0.815713	0.590283	0.594647	0.909091	0.954545	0.954545	0.571045	0.909091	1	0.540185	0.876902	0.954545	0.5		0	0	0	0.0328701	0	0.345435	0.358354	0.32077	0.348784	0.350265	0.28748	0.14374	0.14374	0.343571	0.28748	0	0.334068	0.295217	0.14374	0.316228
EX_adn(e)		1	1	1	0.987656	1	0.764569	0.680027	0.815713	0.590283	0.594647	0.909091	0.954545	0.954545	0.571045	0.909091	1	0.540185	0.876902	0.954545	0.5		0	0	0	0.0328701	0	0.345435	0.358354	0.32077	0.348784	0.350265	0.28748	0.14374	0.14374	0.343571	0.28748	0	0.334068	0.295217	0.14374	0.316228
EX_adp		1	1	1	0.987656	1	0.764569	0.680027	0.848627	0.598473	0.594647	0.909091	1	1	0.580073	0.909091	1	0.540185	0.879473	1	0.5		0	0	0	0.0328701	0	0.345435	0.358354	0.311613	0.350697	0.350265	0.28748	3.7901e-13	3.7901e-13	0.34635	0.28748	0	0.334068	0.293311	3.7901e-13	0.316228
EX_adprbp(e)		1	1	1	0.987656	1	0.764569	0.680027	0.848627	0.598473	0.594647	0.909091	1	1	0.580073	0.909091	1	0.540185	0.879473	1	0.5		0	0	0	0.0328701	0	0.345435	0.358354	0.311613	0.350697	0.350265	0.28748	3.7901e-13	3.7901e-13	0.34635	0.28748	0	0.334068	0.293311	3.7901e-13	0.316228
EX_adprib(e)		1	1	1	0.987656	1	0.764569	0.680027	0.848627	0.598473	0.594647	0.909091	1	1	0.580073	0.909091	1	0.540185	0.879473	1	0.5		0	0	0	0.0328701	0	0.345435	0.358354	0.311613	0.350697	0.350265	0.28748	3.7901e-13	3.7901e-13	0.34635	0.28748	0	0.334068	0.293311	3.7901e-13	0.316228
EX_adrn(e)		1	1	1	0.987656	1	0.764569	0.680027	0.848627	0.598473	0.594647	0.909091	1	1	0.580073	0.909091	1	0.540185	0.879473	1	0.5		0	0	0	0.0328701	0	0.345435	0.358354	0.311613	0.350697	0.350265	0.28748	3.7901e-13	3.7901e-13	0.34635	0.28748	0	0.334068	0.293311	3.7901e-13	0.316228
EX_adrnl(e)		1	1	1	0.987656	1	0.764569	0.680027	0.848627	0.598473	0.594647	0.909091	1	1	0.580073	0.909091	1	0.540185	0.879473	1	0.5		0	0	0	0.0328701	0	0.345435	0.358354	0.311613	0.350697	0.350265	0.28748	3.7901e-13	3.7901e-13	0.34635	0.28748	0	0.334068	0.293311	3.7901e-13	0.316228
EX_aflatoxin(e)		1	1	1	0.987656	1	0.764569	0.680027	0.848627	0.598473	0.594647	0.909091	1	1	0.580073	0.909091	1	0.540185	0.879473	1	0.5		0	0	0	0.0328701	0	0.345435	0.358354	0.311613	0.350697	0.350265	0.28748	3.7901e-13	3.7901e-13	0.34635	0.28748	0	0.334068	0.293311	3.7901e-13	0.316228
EX_ahandrostanglc(e)		1	1	1	0.987656	1	0.764569	0.680027	0.848627	0.598473	0.594647	0.909091	1	1	0.580073	0.909091	1	0.540185	0.879473	1	0.5		0	0	0	0.0328701	0	0.345435	0.358354	0.311613	0.350697	0.350265	0.28748	3.7901e-13	3.7901e-13	0.34635	0.28748	0	0.334068	0.293311	3.7901e-13	0.316228
EX_ak2lgchol_hs(e)		1	1	1	0.987656	1	0.764569	0.680027	0.848627	0.598473	0.594647	0.909091	1	1	0.580073	0.909091	1	0.540185	0.879473	1	0.5		0	0	0	0.0328701	0	0.345435	0.358354	0.311613	0.350697	0.350265	0.28748	3.7901e-13	3.7901e-13	0.34635	0.28748	0	0.334068	0.293311	3.7901e-13	0.316228
EX_akg(e)		1	1	1	0.987656	1	0.764569	0.680027	0.847265	0.598473	0.594647	0.909091	0.954545	0.954545	0.580073	0.909091	1	0.540185	0.879473	0.954545	0.5		0	0	0	0.0328701	0	0.345435	0.358354	0.313401	0.350697	0.350265	0.28748	0.14374	0.14374	0.34635	0.28748	0	0.334068	0.293311	0.14374	0.316228
EX_ala-B(e)		1	1	1	0.987656	1	0.764569	0.680027	0.848627	0.598473	0.594647	0.909091	1	1	0.580073	0.909091	1	0.540185	0.879473	1	0.5		0	0	0	0.0328701	0	0.345435	0.358354	0.311613	0.350697	0.350265	0.28748	3.7901e-13	3.7901e-13	0.34635	0.28748	0	0.334068	0.293311	3.7901e-13	0.316228
EX_ala-D(e)		1	1	1	0.987656	1	0.764569	0.67569	0.819749	0.584923	0.594647	0.909091	0.979125	0.979125	0.565953	0.909091	1	0.540185	0.876902	0.979125	0.5		0	0	0	0.0328701	0	0.345435	0.361973	0.3152	0.352165	0.350265	0.28748	0.0660125	0.0660125	0.346817	0.28748	0	0.334068	0.295217	0.0660125	0.316228
EX_ala-L(e)		1	1	1	0.987656	1	0.764569	0.67569	0.819749	0.584923	0.594647	0.909091	0.979125	0.979125	0.565953	0.909091	1	0.540185	0.876902	0.979125	0.5		0	0	0	0.0328701	0	0.345435	0.361973	0.3152	0.352165	0.350265	0.28748	0.0660125	0.0660125	0.346817	0.28748	0	0.334068	0.295217	0.0660125	0.316228
EX_aldstrn(e)		1	1	1	0.987656	1	0.764569	0.680027	0.848627	0.598473	0.594647	0.909091	1	1	0.580073	0.909091	1	0.540185	0.879473	1	0.5		0	0	0	0.0328701	0	0.345435	0.358354	0.311613	0.350697	0.350265	0.28748	3.7901e-13	3.7901e-13	0.34635	0.28748	0	0.334068	0.293311	3.7901e-13	0.316228
EX_amp(e)		1	1	1	0.987656	1	0.764569	0.680027	0.848627	0.598473	0.594647	0.909091	1	1	0.580073	0.909091	1	0.540185	0.879473	1	0.5		0	0	0	0.0328701	0	0.345435	0.358354	0.311613	0.350697	0.350265	0.28748	3.7901e-13	3.7901e-13	0.34635	0.28748	0	0.334068	0.293311	3.7901e-13	0.316228
EX_andrstrn(e)		1	1	1	0.987656	1	0.764569	0.680027	0.848627	0.598473	0.594647	0.909091	1	1	0.580073	0.909091	1	0.540185	0.879473	1	0.5		0	0	0	0.0328701	0	0.345435	0.358354	0.311613	0.350697	0.350265	0.28748	3.7901e-13	3.7901e-13	0.34635	0.28748	0	0.334068	0.293311	3.7901e-13	0.316228
EX_andrstrnglc(e)		1	1	1	0.987656	1	0.764569	0.680027	0.848627	0.598473	0.594647	0.909091	1	1	0.580073	0.909091	1	0.540185	0.879473	1	0.5		0	0	0	0.0328701	0	0.345435	0.358354	0.311613	0.350697	0.350265	0.28748	3.7901e-13	3.7901e-13	0.34635	0.28748	0	0.334068	0.293311	3.7901e-13	0.316228
EX_aqcobal(e)		1	1	1	0.987656	1	0.764569	0.680027	0.848627	0.598473	0.594647	0.909091	1	1	0.580073	0.909091	1	0.540185	0.879473	1	0.5		0	0	0	0.0328701	0	0.345435	0.358354	0.311613	0.350697	0.350265	0.28748	3.7901e-13	3.7901e-13	0.34635	0.28748	0	0.334068	0.293311	3.7901e-13	0.316228
EX_arab-L(e)		1	1	1	0.987656	1	0.764569	0.680027	0.848627	0.598473	0.594647	0.909091	1	1	0.580073	0.909091	1	0.540185	0.879473	1	0.5		0	0	0	0.0328701	0	0.345435	0.358354	0.311613	0.350697	0.350265	0.28748	3.7901e-13	3.7901e-13	0.34635	0.28748	0	0.334068	0.293311	3.7901e-13	0.316228
EX_arach(e)		1	1	1	0.987656	1	0.764569	0.680027	0.848627	0.598473	0.594647	0.909091	1	1	0.580073	0.909091	1	0.540185	0.879473	1	0.5		0	0	0	0.0328701	0	0.345435	0.358354	0.311613	0.350697	0.350265	0.28748	3.7901e-13	3.7901e-13	0.34635	0.28748	0	0.334068	0.293311	3.7901e-13	0.316228
EX_arachd(e)		1	1	1	0.987656	1	0.764569	0.680027	0.848627	0.598473	0.594647	0.909091	1	1	0.580073	0.909091	1	0.540185	0.879473	1	0.5		0	0	0	0.0328701	0	0.345435	0.358354	0.311613	0.350697	0.350265	0.28748	3.7901e-13	3.7901e-13	0.34635	0.28748	0	0.334068	0.293311	3.7901e-13	0.316228
EX_arg-L(e)		1	1	1	0.987656	1	0.764569	0.680027	0.848627	0.598473	0.594647	0.909091	1	1	0.580073	0.909091	1	0.540185	0.879473	1	0.5		0	0	0	0.0328701	0	0.345435	0.358354	0.311613	0.350697	0.350265	0.28748	3.7901e-13	3.7901e-13	0.34635	0.28748	0	0.334068	0.293311	3.7901e-13	0.316228
EX_ascb-L(e)		1	1	1	0.987656	1	0.764569	0.680027	0.848627	0.598473	0.594647	0.909091	1	1	0.580073	0.909091	1	0.540185	0.879473	1	0.5		0	0	0	0.0328701	0	0.345435	0.358354	0.311613	0.350697	0.350265	0.28748	3.7901e-13	3.7901e-13	0.34635	0.28748	0	0.334068	0.293311	3.7901e-13	0.316228
EX_asn-L(e)		1	1	1	0.987656	1	0.764569	0.680027	0.815713	0.590283	0.594647	0.909091	0.954545	0.954545	0.571045	0.909091	1	0.540185	0.876902	0.954545	0.5		0	0	0	0.0328701	0	0.345435	0.358354	0.32077	0.348784	0.350265	0.28748	0.14374	0.14374	0.343571	0.28748	0	0.334068	0.295217	0.14374	0.316228
EX_asp-D(e)		1	1	1	0.987656	1	0.764569	0.680027	0.848627	0.598473	0.594647	0.909091	1	1	0.580073	0.909091	1	0.540185	0.879473	1	0.5		0	0	0	0.0328701	0	0.345435	0.358354	0.311613	0.350697	0.350265	0.28748	3.7901e-13	3.7901e-13	0.34635	0.28748	0	0.334068	0.293311	3.7901e-13	0.316228
EX_asp-L(e)		1	1	1	0.987656	1	0.764569	0.680027	0.848627	0.598473	0.594647	0.909091	1	1	0.580073	0.909091	1	0.540185	0.879473	1	0.5		0	0	0	0.0328701	0	0.345435	0.358354	0.311613	0.350697	0.350265	0.28748	3.7901e-13	3.7901e-13	0.34635	0.28748	0	0.334068	0.293311	3.7901e-13	0.316228
EX_atp(e)		1	1	1	0.987656	1	0.764569	0.680027	0.848627	0.598473	0.594647	0.909091	1	1	0.580073	0.909091	1	0.540185	0.879473	1	0.5		0	0	0	0.0328701	0	0.345435	0.358354	0.311613	0.350697	0.350265	0.28748	3.7901e-13	3.7901e-13	0.34635	0.28748	0	0.334068	0.293311	3.7901e-13	0.316228
EX_avite1(e)		1	1	1	0.987656	1	0.764569	0.680027	0.848627	0.598473	0.594647	0.909091	1	1	0.580073	0.909091	1	0.540185	0.879473	1	0.5		0	0	0	0.0328701	0	0.345435	0.358354	0.311613	0.350697	0.350265	0.28748	3.7901e-13	3.7901e-13	0.34635	0.28748	0	0.334068	0.293311	3.7901e-13	0.316228
EX_avite2(e)		1	1	1	0.987656	1	0.764569	0.680027	0.848627	0.598473	0.594647	0.909091	1	1	0.580073	0.909091	1	0.540185	0.879473	1	0.5		0	0	0	0.0328701	0	0.345435	0.358354	0.311613	0.350697	0.350265	0.28748	3.7901e-13	3.7901e-13	0.34635	0.28748	0	0.334068	0.293311	3.7901e-13	0.316228
EX_bhb(e)		1	1	1	0.987656	1	0.764569	0.680027	0.848627	0.598473	0.594647	0.909091	0.961995	0.954545	0.580073	0.909091	1	0.540185	0.879473	0.954545	0.5		0	0	0	0.0328701	0	0.345435	0.358354	0.311613	0.350697	0.350265	0.28748	0.120184	0.14374	0.34635	0.28748	0	0.334068	0.293311	0.14374	0.316228
EX_bildglcur(e)		1	1	1	0.987656	1	0.764569	0.680027	0.848627	0.598473	0.594647	0.909091	1	1	0.580073	0.909091	1	0.540185	0.879473	1	0.5		0	0	0	0.0328701	0	0.345435	0.358354	0.311613	0.350697	0.350265	0.28748	3.7901e-13	3.7901e-13	0.34635	0.28748	0	0.334068	0.293311	3.7901e-13	0.316228
EX_bilglcur(e)		1	1	1	0.987656	1	0.764569	0.680027	0.848627	0.598473	0.594647	0.909091	1	1	0.580073	0.909091	1	0.540185	0.879473	1	0.5		0	0	0	0.0328701	0	0.345435	0.358354	0.311613	0.350697	0.350265	0.28748	3.7901e-13	3.7901e-13	0.34635	0.28748	0	0.334068	0.293311	3.7901e-13	0.316228
EX_bilirub(e)		1	1	1	0.987656	1	0.764569	0.680027	0.848627	0.598473	0.594647	0.909091	1	1	0.580073	0.909091	1	0.540185	0.879473	1	0.5		0	0	0	0.0328701	0	0.345435	0.358354	0.311613	0.350697	0.350265	0.28748	3.7901e-13	3.7901e-13	0.34635	0.28748	0	0.334068	0.293311	3.7901e-13	0.316228
EX_biocyt(e)		1	1	1	0.987656	1	0.764569	0.680027	0.848627	0.598473	0.594647	0.909091	1	1	0.580073	0.909091	1	0.540185	0.879473	1	0.5		0	0	0	0.0328701	0	0.345435	0.358354	0.311613	0.350697	0.350265	0.28748	3.7901e-13	3.7901e-13	0.34635	0.28748	0	0.334068	0.293311	3.7901e-13	0.316228
EX_btn(e)		1	1	1	0.987656	1	0.764569	0.680027	0.848627	0.598473	0.594647	0.909091	1	1	0.580073	0.909091	1	0.540185	0.879473	1	0.5		0	0	0	0.0328701	0	0.345435	0.358354	0.311613	0.350697	0.350265	0.28748	3.7901e-13	3.7901e-13	0.34635	0.28748	0	0.334068	0.293311	3.7901e-13	0.316228
EX_but(e)		1	1	1	0.987656	1	0.764569	0.680027	0.848627	0.598473	0.594647	0.909091	1	1	0.580073	0.909091	1	0.540185	0.879473	1	0.5		0	0	0	0.0328701	0	0.345435	0.358354	0.311613	0.350697	0.350265	0.28748	3.7901e-13	3.7901e-13	0.34635	0.28748	0	0.334068	0.293311	3.7901e-13	0.316228
EX_bvite(e)		1	1	1	0.987656	1	0.764569	0.680027	0.848627	0.598473	0.594647	0.909091	1	1	0.580073	0.909091	1	0.540185	0.879473	1	0.5		0	0	0	0.0328701	0	0.345435	0.358354	0.311613	0.350697	0.350265	0.28748	3.7901e-13	3.7901e-13	0.34635	0.28748	0	0.334068	0.293311	3.7901e-13	0.316228
EX_bz(e)		1	1	1	0.987656	1	0.764569	0.680027	0.848627	0.598473	0.594647	0.909091	1	1	0.580073	0.909091	1	0.540185	0.879473	1	0.5		0	0	0	0.0328701	0	0.345435	0.358354	0.311613	0.350697	0.350265	0.28748	3.7901e-13	3.7901e-13	0.34635	0.28748	0	0.334068	0.293311	3.7901e-13	0.316228
EX_ca2(e)		1	1	1	0.987656	1	0.764569	0.680027	0.848627	0.598473	0.594647	0.909091	1	1	0.580073	0.909091	1	0.540185	0.879473	1	0.5		0	0	0	0.0328701	0	0.345435	0.358354	0.311613	0.350697	0.350265	0.28748	3.7901e-13	3.7901e-13	0.34635	0.28748	0	0.334068	0.293311	3.7901e-13	0.316228
EX_camp(e)		1	1	1	0.987656	1	0.764569	0.680027	0.815713	0.590283	0.594647	0.909091	0.954545	0.954545	0.571045	0.909091	1	0.540185	0.876902	0.954545	0.5		0	0	0	0.0328701	0	0.345435	0.358354	0.32077	0.348784	0.350265	0.28748	0.14374	0.14374	0.343571	0.28748	0	0.334068	0.295217	0.14374	0.316228
EX_cca_d3(e)		1	1	1	0.987656	1	0.764569	0.680027	0.848627	0.598473	0.594647	0.909091	1	1	0.580073	0.909091	1	0.540185	0.879473	1	0.5		0	0	0	0.0328701	0	0.345435	0.358354	0.311613	0.350697	0.350265	0.28748	3.7901e-13	3.7901e-13	0.34635	0.28748	0	0.334068	0.293311	3.7901e-13	0.316228
EX_cgly(e)		0.933124	0.933124	0.969602	0.945098	0.933124	0.713331	0.615497	0.751556	0.525155	0.575543	0.890852	0.893749	0.893749	0.506598	0.848295	0.933124	0.521761	0.815045	0.893749	0.478414		0	0	0.0332994	0.0326296	3.34745e-17	0.322347	0.333016	0.298862	0.315508	0.329028	0.283224	0.124514	0.124514	0.309332	0.268254	3.34745e-17	0.316864	0.278163	0.124514	0.300164
EX_chol(e)		1	1	1	0.987656	1	0.764569	0.680027	0.848627	0.598473	0.594647	0.909091	0.955224	0.955224	0.580073	0.909091	1	0.540185	0.879473	0.955224	0.5		0	0	0	0.0328701	0	0.345435	0.358354	0.311613	0.350697	0.350265	0.28748	0.141595	0.141595	0.34635	0.28748	0	0.334068	0.293311	0.141595	0.316228
EX_cholate(e)		1	1	1	0.987656	1	0.764569	0.680027	0.848627	0.598473	0.594647	0.909091	1	1	0.580073	0.909091	1	0.540185	0.879473	1	0.5		0	0	0	0.0328701	0	0.345435	0.358354	0.311613	0.350697	0.350265	0.28748	3.7901e-13	3.7901e-13	0.34635	0.28748	0	0.334068	0.293311	3.7901e-13	0.316228
EX_chsterol(e)		1	1	1	0.987656	1	0.764569	0.680027	0.848627	0.598473	0.594647	0.909091	0.956559	0.956448	0.580073	0.909091	1	0.540185	0.879473	0.956554	0.5		0	0	0	0.0328701	0	0.345435	0.358354	0.311613	0.350697	0.350265	0.28748	0.137372	0.137722	0.34635	0.28748	0	0.334068	0.293311	0.137387	0.316228
EX_chtn(e)		1	1	1	0.987656	1	0.764569	0.680027	0.848627	0.598473	0.594647	0.909091	1	1	0.580073	0.909091	1	0.540185	0.879473	1	0.5		0	0	0	0.0328701	0	0.345435	0.358354	0.311613	0.350697	0.350265	0.28748	3.7901e-13	3.7901e-13	0.34635	0.28748	0	0.334068	0.293311	3.7901e-13	0.316228
EX_cit(e)		1	1	1	0.987656	1	0.764569	0.680027	0.820227	0.598473	0.594647	0.909091	0.954545	0.954545	0.580073	0.909091	1	0.540185	0.878633	0.954545	0.5		0	0	0	0.0328701	0	0.345435	0.358354	0.319929	0.350697	0.350265	0.28748	0.14374	0.14374	0.34635	0.28748	0	0.334068	0.293911	0.14374	0.316228
EX_cl(e)		1	1	1	0.987656	1	0.764569	0.680027	0.848627	0.598473	0.594647	0.909091	1	1	0.580073	0.909091	1	0.540185	0.879473	1	0.5		0	0	0	0.0328701	0	0.345435	0.358354	0.311613	0.350697	0.350265	0.28748	3.7901e-13	3.7901e-13	0.34635	0.28748	0	0.334068	0.293311	3.7901e-13	0.316228
EX_cmp(e)		1	1	1	0.987656	1	0.764569	0.680027	0.848627	0.598473	0.594647	0.909091	1	1	0.580073	0.909091	1	0.540185	0.879473	1	0.5		0	0	0	0.0328701	0	0.345435	0.358354	0.311613	0.350697	0.350265	0.28748	3.7901e-13	3.7901e-13	0.34635	0.28748	0	0.334068	0.293311	3.7901e-13	0.316228
EX_co(e)		1	1	1	0.987656	1	0.764569	0.680027	0.848627	0.598473	0.594647	0.909091	1	1	0.580073	0.909091	1	0.540185	0.879473	1	0.5		0	0	0	0.0328701	0	0.345435	0.358354	0.311613	0.350697	0.350265	0.28748	3.7901e-13	3.7901e-13	0.34635	0.28748	0	0.334068	0.293311	3.7901e-13	0.316228
EX_co2(e)		1	1	1	0.987656	1	0.764569	0.680027	0.848627	0.598473	0.594647	0.90897	0.955885	0.954648	0.580073	0.909091	1	0.540185	0.879473	0.957292	0.5		0	0	0	0.0328701	0	0.345435	0.358354	0.311613	0.350697	0.350265	0.287442	0.139505	0.143415	0.34635	0.28748	0	0.334068	0.293311	0.135055	0.316228
EX_coumarin(e)		1	1	1	0.987656	1	0.764569	0.680027	0.848627	0.598473	0.594647	0.909091	1	1	0.580073	0.909091	1	0.540185	0.879473	1	0.5		0	0	0	0.0328701	0	0.345435	0.358354	0.311613	0.350697	0.350265	0.28748	3.7901e-13	3.7901e-13	0.34635	0.28748	0	0.334068	0.293311	3.7901e-13	0.316228
EX_creat(e)		1	1	1	0.987656	1	0.764569	0.680027	0.817652	0.595384	0.594647	0.909091	0.954545	0.954545	0.576078	0.909091	1	0.540185	0.877646	0.954545	0.5		0	0	0	0.0328701	0	0.345435	0.358354	0.320383	0.350345	0.350265	0.28748	0.14374	0.14374	0.345102	0.28748	0	0.334068	0.294644	0.14374	0.316228
EX_crmp_hs(e)		1	1	1	0.987656	1	0.764569	0.680027	0.84814	0.598473	0.594647	0.909091	0.954544	0.973925	0.580073	0.909091	1	0.540185	0.879473	0.971685	0.5		0	0	0	0.0328701	0	0.345435	0.358354	0.31138	0.350697	0.350265	0.28748	0.143743	0.0824559	0.34635	0.28748	0	0.334068	0.293311	0.0895394	0.316228
EX_crn(e)		1	1	1	0.987656	1	0.764569	0.680027	0.848627	0.598473	0.594647	0.909091	1	1	0.580073	0.909091	1	0.540185	0.879473	1	0.5		0	0	0	0.0328701	0	0.345435	0.358354	0.311613	0.350697	0.350265	0.28748	3.7901e-13	3.7901e-13	0.34635	0.28748	0	0.334068	0.293311	3.7901e-13	0.316228
EX_crtsl(e)		1	1	1	0.987656	1	0.764569	0.680027	0.848627	0.598473	0.594647	0.909091	1	1	0.580073	0.909091	1	0.540185	0.879473	1	0.5		0	0	0	0.0328701	0	0.345435	0.358354	0.311613	0.350697	0.350265	0.28748	3.7901e-13	3.7901e-13	0.34635	0.28748	0	0.334068	0.293311	3.7901e-13	0.316228
EX_crtstrn(e)		1	1	1	0.987656	1	0.764569	0.680027	0.848627	0.598473	0.594647	0.909091	1	1	0.580073	0.909091	1	0.540185	0.879473	1	0.5		0	0	0	0.0328701	0	0.345435	0.358354	0.311613	0.350697	0.350265	0.28748	3.7901e-13	3.7901e-13	0.34635	0.28748	0	0.334068	0.293311	3.7901e-13	0.316228
EX_crvnc(e)		1	1	1	0.987656	1	0.764569	0.680027	0.848627	0.598473	0.594647	0.909091	1	1	0.580073	0.909091	1	0.540185	0.879473	1	0.5		0	0	0	0.0328701	0	0.345435	0.358354	0.311613	0.350697	0.350265	0.28748	3.7901e-13	3.7901e-13	0.34635	0.28748	0	0.334068	0.293311	3.7901e-13	0.316228
EX_csn(e)		1	1	1	0.987656	1	0.764569	0.680027	0.848627	0.598473	0.594647	0.909091	1	1	0.580073	0.909091	1	0.540185	0.879473	1	0.5		0	0	0	0.0328701	0	0.345435	0.358354	0.311613	0.350697	0.350265	0.28748	3.7901e-13	3.7901e-13	0.34635	0.28748	0	0.334068	0.293311	3.7901e-13	0.316228
EX_cspg_a(e)		1	1	1	0.987656	1	0.764569	0.680027	0.848627	0.598473	0.594647	0.909091	1	1	0.580073	0.909091	1	0.540185	0.879473	1	0.5		0	0	0	0.0328701	0	0.345435	0.358354	0.311613	0.350697	0.350265	0.28748	3.7901e-13	3.7901e-13	0.34635	0.28748	0	0.334068	0.293311	3.7901e-13	0.316228
EX_cspg_b(e)		1	1	1	0.987656	1	0.764569	0.680027	0.848627	0.598473	0.594647	0.909091	1	1	0.580073	0.909091	1	0.540185	0.879473	1	0.5		0	0	0	0.0328701	0	0.345435	0.358354	0.311613	0.350697	0.350265	0.28748	3.7901e-13	3.7901e-13	0.34635	0.28748	0	0.334068	0.293311	3.7901e-13	0.316228
EX_cspg_c(e)		1	1	1	0.987656	1	0.764569	0.680027	0.848627	0.598473	0.594647	0.909091	1	1	0.580073	0.909091	1	0.540185	0.879473	1	0.5		0	0	0	0.0328701	0	0.345435	0.358354	0.311613	0.350697	0.350265	0.28748	3.7901e-13	3.7901e-13	0.34635	0.28748	0	0.334068	0.293311	3.7901e-13	0.316228
EX_cspg_d(e)		1	1	1	0.987656	1	0.764569	0.680027	0.848627	0.598473	0.594647	0.909091	1	1	0.580073	0.909091	1	0.540185	0.879473	1	0.5		0	0	0	0.0328701	0	0.345435	0.358354	0.311613	0.350697	0.350265	0.28748	3.7901e-13	3.7901e-13	0.34635	0.28748	0	0.334068	0.293311	3.7901e-13	0.316228
EX_cspg_e(e)		1	1	1	0.987656	1	0.764569	0.680027	0.848627	0.598473	0.594647	0.909091	1	1	0.580073	0.909091	1	0.540185	0.879473	1	0.5		0	0	0	0.0328701	0	0.345435	0.358354	0.311613	0.350697	0.350265	0.28748	3.7901e-13	3.7901e-13	0.34635	0.28748	0	0.334068	0.293311	3.7901e-13	0.316228
EX_cyan(e)		1	1	1	0.987656	1	0.764569	0.680027	0.848627	0.598473	0.594647	0.909091	1	1	0.580073	0.909091	1	0.540185	0.879473	1	0.5		0	0	0	0.0328701	0	0.345435	0.358354	0.311613	0.350697	0.350265	0.28748	3.7901e-13	3.7901e-13	0.34635	0.28748	0	0.334068	0.293311	3.7901e-13	0.316228
EX_cys-L(e)		0.933124	0.933124	0.969602	0.945098	0.933124	0.713331	0.615497	0.751556	0.525155	0.575543	0.890852	0.893749	0.893749	0.506598	0.848295	0.933124	0.521761	0.815045	0.893749	0.478414		3.34745e-17	0	0.0332994	0.0326296	0	0.322347	0.333016	0.298862	0.315508	0.329028	0.283224	0.124514	0.124514	0.309332	0.268254	0	0.316864	0.278163	0.124514	0.300164
EX_cytd(e)		1	1	1	0.987656	1	0.764569	0.680027	0.815713	0.590283	0.594647	0.909091	0.954545	0.954545	0.571045	0.909091	1	0.540185	0.876902	0.954545	0.5		0	0	0	0.0328701	0	0.345435	0.358354	0.32077	0.348784	0.350265	0.28748	0.14374	0.14374	0.343571	0.28748	0	0.334068	0.295217	0.14374	0.316228
EX_dad-2(e)		1	1	1	0.987656	1	0.764569	0.680027	0.815713	0.590283	0.594647	0.909091	0.954545	0.954545	0.571045	0.909091	1	0.540185	0.876902	0.954545	0.5		0	0	0	0.0328701	0	0.345435	0.358354	0.32077	0.348784	0.350265	0.28748	0.14374	0.14374	0.343571	0.28748	0	0.334068	0.295217	0.14374	0.316228
EX_dag_hs(e)		1	1	1	0.987656	1	0.764569	0.680027	0.848627	0.598473	0.594647	0.909091	0.954545	0.977433	0.580073	0.909091	1	0.540185	0.879473	0.975151	0.5		0	0	0	0.0328701	0	0.345435	0.358354	0.311613	0.350697	0.350265	0.28748	0.14374	0.0713643	0.34635	0.28748	0	0.334068	0.293311	0.0785786	0.316228
EX_dcsptn1(e)		1	1	1	0.987656	1	0.764569	0.680027	0.848627	0.598473	0.594647	0.909091	1	1	0.580073	0.909091	1	0.540185	0.879473	1	0.5		0	0	0	0.0328701	0	0.345435	0.358354	0.311613	0.350697	0.350265	0.28748	3.7901e-13	3.7901e-13	0.34635	0.28748	0	0.334068	0.293311	3.7901e-13	0.316228
EX_dcyt(e)		1	1	1	0.987656	1	0.764569	0.680027	0.815713	0.590283	0.594647	0.909091	0.954545	0.954545	0.571045	0.909091	1	0.540185	0.876902	0.954545	0.5		0	0	0	0.0328701	0	0.345435	0.358354	0.32077	0.348784	0.350265	0.28748	0.14374	0.14374	0.343571	0.28748	0	0.334068	0.295217	0.14374	0.316228
EX_debrisoquine(e)		1	1	1	0.987656	1	0.764569	0.680027	0.848627	0.598473	0.594647	0.909091	1	1	0.580073	0.909091	1	0.540185	0.879473	1	0.5		0	0	0	0.0328701	0	0.345435	0.358354	0.311613	0.350697	0.350265	0.28748	3.7901e-13	3.7901e-13	0.34635	0.28748	0	0.334068	0.293311	3.7901e-13	0.316228
EX_dgchol(e)		1	1	1	0.987656	1	0.764569	0.680027	0.848627	0.598473	0.594647	0.909091	1	1	0.580073	0.909091	1	0.540185	0.879473	1	0.5		0	0	0	0.0328701	0	0.345435	0.358354	0.311613	0.350697	0.350265	0.28748	3.7901e-13	3.7901e-13	0.34635	0.28748	0	0.334068	0.293311	3.7901e-13	0.316228
EX_dgsn(e)		1	1	1	0.987656	1	0.764569	0.680027	0.815713	0.590283	0.594647	0.909091	0.954545	0.954545	0.571045	0.909091	1	0.540185	0.876902	0.954545	0.5		0	0	0	0.0328701	0	0.345435	0.358354	0.32077	0.348784	0.350265	0.28748	0.14374	0.14374	0.343571	0.28748	0	0.334068	0.295217	0.14374	0.316228
EX_dhdascb(e)		1	1	1	0.987656	1	0.764569	0.680027	0.848627	0.598473	0.594647	0.909091	1	1	0.580073	0.909091	1	0.540185	0.879473	1	0.5		0	0	0	0.0328701	0	0.345435	0.358354	0.311613	0.350697	0.350265	0.28748	3.7901e-13	3.7901e-13	0.34635	0.28748	0	0.334068	0.293311	3.7901e-13	0.316228
EX_dheas(e)		1	1	1	0.987656	1	0.764569	0.680027	0.848627	0.598473	0.594647	0.909091	1	1	0.580073	0.909091	1	0.540185	0.879473	1	0.5		0	0	0	0.0328701	0	0.345435	0.358354	0.311613	0.350697	0.350265	0.28748	3.7901e-13	3.7901e-13	0.34635	0.28748	0	0.334068	0.293311	3.7901e-13	0.316228
EX_dhf(e)		1	1	1	0.987656	1	0.764569	0.680027	0.848627	0.598473	0.594647	0.909091	1	1	0.580073	0.909091	1	0.540185	0.879473	1	0.5		0	0	0	0.0328701	0	0.345435	0.358354	0.311613	0.350697	0.350265	0.28748	3.7901e-13	3.7901e-13	0.34635	0.28748	0	0.334068	0.293311	3.7901e-13	0.316228
EX_digalsgalside_hs(e)		1	1	1	0.987656	1	0.764569	0.680027	0.848627	0.598473	0.594647	0.909091	1	1	0.580073	0.909091	1	0.540185	0.879473	1	0.5		0	0	0	0.0328701	0	0.345435	0.358354	0.311613	0.350697	0.350265	0.28748	3.7901e-13	3.7901e-13	0.34635	0.28748	0	0.334068	0.293311	3.7901e-13	0.316228
EX_din(e)		1	1	1	0.987656	1	0.764569	0.680027	0.815713	0.590283	0.594647	0.909091	0.954545	0.954545	0.571045	0.909091	1	0.540185	0.876902	0.954545	0.5		0	0	0	0.0328701	0	0.345435	0.358354	0.32077	0.348784	0.350265	0.28748	0.14374	0.14374	0.343571	0.28748	0	0.334068	0.295217	0.14374	0.316228
EX_dlnlcg(e)		1	1	1	0.987656	1	0.764569	0.680027	0.848627	0.598473	0.594647	0.909091	1	1	0.580073	0.909091	1	0.540185	0.879473	1	0.5		0	0	0	0.0328701	0	0.345435	0.358354	0.311613	0.350697	0.350265	0.28748	3.7901e-13	3.7901e-13	0.34635	0.28748	0	0.334068	0.293311	3.7901e-13	0.316228
EX_dmhptcrn(e)		1	1	1	0.987656	1	0.764569	0.680027	0.848627	0.598473	0.594647	0.909091	1	1	0.580073	0.909091	1	0.540185	0.879473	1	0.5		0	0	0	0.0328701	0	0.345435	0.358354	0.311613	0.350697	0.350265	0.28748	3.7901e-13	3.7901e-13	0.34635	0.28748	0	0.334068	0.293311	3.7901e-13	0.316228
EX_dopa(e)		1	1	1	0.987656	1	0.764569	0.680027	0.848627	0.598473	0.594647	0.909091	1	1	0.580073	0.909091	1	0.540185	0.879473	1	0.5		0	0	0	0.0328701	0	0.345435	0.358354	0.311613	0.350697	0.350265	0.28748	3.7901e-13	3.7901e-13	0.34635	0.28748	0	0.334068	0.293311	3.7901e-13	0.316228
EX_dopasf(e)		1	1	1	0.987656	1	0.764569	0.680027	0.848627	0.598473	0.594647	0.909091	1	1	0.580073	0.909091	1	0.540185	0.879473	1	0.5		0	0	0	0.0328701	0	0.345435	0.358354	0.311613	0.350697	0.350265	0.28748	3.7901e-13	3.7901e-13	0.34635	0.28748	0	0.334068	0.293311	3.7901e-13	0.316228
EX_drib(e)		1	1	1	0.987656	1	0.764569	0.680027	0.848627	0.598473	0.594647	0.909091	0.955539	0.955724	0.580073	0.909091	1	0.540185	0.879473	0.955539	0.5		0	0	0	0.0328701	0	0.345435	0.358354	0.311613	0.350697	0.350265	0.28748	0.140597	0.140014	0.34635	0.28748	0	0.334068	0.293311	0.140597	0.316228
EX_duri(e)		1	1	1	0.987656	1	0.764569	0.680027	0.815713	0.591851	0.594647	0.909091	0.954545	0.954545	0.572632	0.909091	1	0.540185	0.876902	0.954545	0.5		0	0	0	0.0328701	0	0.345435	0.358354	0.32077	0.3504	0.350265	0.28748	0.14374	0.14374	0.34536	0.28748	0	0.334068	0.295217	0.14374	0.316228
EX_eaflatoxin(e)		1	1	1	0.987656	1	0.764569	0.680027	0.848627	0.598473	0.594647	0.909091	1	1	0.580073	0.909091	1	0.540185	0.879473	1	0.5		0	0	0	0.0328701	0	0.345435	0.358354	0.311613	0.350697	0.350265	0.28748	3.7901e-13	3.7901e-13	0.34635	0.28748	0	0.334068	0.293311	3.7901e-13	0.316228
EX_ebastine(e)		1	1	1	0.987656	1	0.764569	0.680027	0.848627	0.598473	0.594647	0.909091	1	1	0.580073	0.909091	1	0.540185	0.879473	1	0.5		0	0	0	0.0328701	0	0.345435	0.358354	0.311613	0.350697	0.350265	0.28748	3.7901e-13	3.7901e-13	0.34635	0.28748	0	0.334068	0.293311	3.7901e-13	0.316228
EX_ebastineoh(e)		1	1	1	0.987656	1	0.764569	0.680027	0.848627	0.598473	0.594647	0.909091	1	1	0.580073	0.909091	1	0.540185	0.879473	1	0.5		0	0	0	0.0328701	0	0.345435	0.358354	0.311613	0.350697	0.350265	0.28748	3.7901e-13	3.7901e-13	0.34635	0.28748	0	0.334068	0.293311	3.7901e-13	0.316228
EX_eicostet(e)		1	1	1	0.987656	1	0.764569	0.680027	0.848627	0.598473	0.594647	0.909091	1	1	0.580073	0.909091	1	0.540185	0.879473	1	0.5		0	0	0	0.0328701	0	0.345435	0.358354	0.311613	0.350697	0.350265	0.28748	3.7901e-13	3.7901e-13	0.34635	0.28748	0	0.334068	0.293311	3.7901e-13	0.316228
EX_elaid(e)		1	1	1	0.987656	1	0.764569	0.680027	0.848627	0.598473	0.594647	0.909091	0.970258	0.968698	0.580073	0.909091	1	0.540185	0.879473	0.970834	0.5		0	0	0	0.0328701	0	0.345435	0.358354	0.311613	0.350697	0.350265	0.28748	0.0940509	0.0989848	0.34635	0.28748	0	0.334068	0.293311	0.0922295	0.316228
EX_estradiol(e)		1	1	1	0.987656	1	0.764569	0.680027	0.848627	0.598473	0.594647	0.909091	1	1	0.580073	0.909091	1	0.540185	0.879473	1	0.5		0	0	0	0.0328701	0	0.345435	0.358354	0.311613	0.350697	0.350265	0.28748	3.7901e-13	3.7901e-13	0.34635	0.28748	0	0.334068	0.293311	3.7901e-13	0.316228
EX_estradiolglc(e)		1	1	1	0.987656	1	0.764569	0.680027	0.848627	0.598473	0.594647	0.909091	1	1	0.580073	0.909091	1	0.540185	0.879473	1	0.5		0	0	0	0.0328701	0	0.345435	0.358354	0.311613	0.350697	0.350265	0.28748	3.7901e-13	3.7901e-13	0.34635	0.28748	0	0.334068	0.293311	3.7901e-13	0.316228
EX_estriolglc(e)		1	1	1	0.987656	1	0.764569	0.680027	0.848627	0.598473	0.594647	0.909091	1	1	0.580073	0.909091	1	0.540185	0.879473	1	0.5		0	0	0	0.0328701	0	0.345435	0.358354	0.311613	0.350697	0.350265	0.28748	3.7901e-13	3.7901e-13	0.34635	0.28748	0	0.334068	0.293311	3.7901e-13	0.316228
EX_estroneglc(e)		1	1	1	0.987656	1	0.764569	0.680027	0.848627	0.598473	0.594647	0.909091	1	1	0.580073	0.909091	1	0.540185	0.879473	1	0.5		0	0	0	0.0328701	0	0.345435	0.358354	0.311613	0.350697	0.350265	0.28748	3.7901e-13	3.7901e-13	0.34635	0.28748	0	0.334068	0.293311	3.7901e-13	0.316228
EX_estrones(e)		1	1	1	0.987656	1	0.764569	0.680027	0.848627	0.598473	0.594647	0.909091	1	1	0.580073	0.909091	1	0.540185	0.879473	1	0.5		0	0	0	0.0328701	0	0.345435	0.358354	0.311613	0.350697	0.350265	0.28748	3.7901e-13	3.7901e-13	0.34635	0.28748	0	0.334068	0.293311	3.7901e-13	0.316228
EX_etoh(e)		1	1	1	0.987656	1	0.764569	0.680027	0.848627	0.598473	0.594647	0.909091	1	1	0.580073	0.909091	1	0.540185	0.879473	1	0.5		0	0	0	0.0328701	0	0.345435	0.358354	0.311613	0.350697	0.350265	0.28748	3.7901e-13	3.7901e-13	0.34635	0.28748	0	0.334068	0.293311	3.7901e-13	0.316228
EX_fe2(e)		1	1	1	0.987656	1	0.764569	0.680027	0.848627	0.598473	0.594647	0.909091	1	1	0.580073	0.909091	1	0.540185	0.879473	1	0.5		0	0	0	0.0328701	0	0.345435	0.358354	0.311613	0.350697	0.350265	0.28748	3.7901e-13	3.7901e-13	0.34635	0.28748	0	0.334068	0.293311	3.7901e-13	0.316228
EX_fol(e)		1	1	1	0.987656	1	0.764569	0.680027	0.848627	0.598473	0.594647	0.909091	1	1	0.580073	0.909091	1	0.540185	0.879473	1	0.5		0	0	0	0.0328701	0	0.345435	0.358354	0.311613	0.350697	0.350265	0.28748	3.7901e-13	3.7901e-13	0.34635	0.28748	0	0.334068	0.293311	3.7901e-13	0.316228
EX_for(e)		1	1	1	0.987656	1	0.764569	0.680027	0.848627	0.598473	0.594647	0.909091	0.956115	0.956072	0.580073	0.909091	1	0.540185	0.879473	0.95611	0.5		0	0	0	0.0328701	0	0.345435	0.358354	0.311613	0.350697	0.350265	0.28748	0.138778	0.138912	0.34635	0.28748	0	0.334068	0.293311	0.138793	0.316228
EX_fru(e)		1	1	1	0.987656	1	0.764569	0.680027	0.848627	0.598473	0.594647	0.909091	0.955178	0.955236	0.580073	0.909091	1	0.540185	0.879473	0.955178	0.5		0	0	0	0.0328701	0	0.345435	0.358354	0.311613	0.350697	0.350265	0.28748	0.14174	0.141556	0.34635	0.28748	0	0.334068	0.293311	0.14174	0.316228
EX_fuc-L(e)		1	1	1	0.987656	1	0.764569	0.680027	0.848627	0.598473	0.594647	0.909091	1	1	0.580073	0.909091	1	0.540185	0.879473	1	0.5		0	0	0	0.0328701	0	0.345435	0.358354	0.311613	0.350697	0.350265	0.28748	3.7901e-13	3.7901e-13	0.34635	0.28748	0	0.334068	0.293311	3.7901e-13	0.316228
EX_fuc13galacglcgal14acglcgalgluside_hs(e)		1	1	1	0.987656	1	0.764569	0.680027	0.848627	0.598473	0.594647	0.909091	1	1	0.580073	0.909091	1	0.540185	0.879473	1	0.5		0	0	0	0.0328701	0	0.345435	0.358354	0.311613	0.350697	0.350265	0.28748	3.7901e-13	3.7901e-13	0.34635	0.28748	0	0.334068	0.293311	3.7901e-13	0.316228
EX_fuc14galacglcgalgluside_hs(e)		1	1	1	0.987656	1	0.764569	0.680027	0.848627	0.598473	0.594647	0.909091	1	1	0.580073	0.909091	1	0.540185	0.879473	1	0.5		0	0	0	0.0328701	0	0.345435	0.358354	0.311613	0.350697	0.350265	0.28748	3.7901e-13	3.7901e-13	0.34635	0.28748	0	0.334068	0.293311	3.7901e-13	0.316228
EX_fucacgalfucgalacglcgalgluside_hs(e)		1	1	1	0.987656	1	0.764569	0.680027	0.848627	0.598473	0.594647	0.909091	1	1	0.580073	0.909091	1	0.540185	0.879473	1	0.5		0	0	0	0.0328701	0	0.345435	0.358354	0.311613	0.350697	0.350265	0.28748	3.7901e-13	3.7901e-13	0.34635	0.28748	0	0.334068	0.293311	3.7901e-13	0.316228
EX_fucacngal14acglcgalgluside_hs(e)		1	1	1	0.987656	1	0.764569	0.680027	0.848627	0.598473	0.594647	0.909091	1	1	0.580073	0.909091	1	0.540185	0.879473	1	0.5		0	0	0	0.0328701	0	0.345435	0.358354	0.311613	0.350697	0.350265	0.28748	3.7901e-13	3.7901e-13	0.34635	0.28748	0	0.334068	0.293311	3.7901e-13	0.316228
EX_fucacngalacglcgalgluside_hs(e)		1	1	1	0.987656	1	0.764569	0.680027	0.848627	0.598473	0.594647	0.909091	1	1	0.580073	0.909091	1	0.540185	0.879473	1	0.5		0	0	0	0.0328701	0	0.345435	0.358354	0.311613	0.350697	0.350265	0.28748	3.7901e-13	3.7901e-13	0.34635	0.28748	0	0.334068	0.293311	3.7901e-13	0.316228
EX_fucfuc12gal14acglcgalgluside_hs(e)		1	1	1	0.987656	1	0.764569	0.680027	0.848627	0.598473	0.594647	0.909091	1	1	0.580073	0.909091	1	0.540185	0.879473	1	0.5		0	0	0	0.0328701	0	0.345435	0.358354	0.311613	0.350697	0.350265	0.28748	3.7901e-13	3.7901e-13	0.34635	0.28748	0	0.334068	0.293311	3.7901e-13	0.316228
EX_fucfuc132galacglcgal14acglcgalgluside_hs(e)		1	1	1	0.987656	1	0.764569	0.680027	0.848627	0.598473	0.594647	0.909091	1	1	0.580073	0.909091	1	0.540185	0.879473	1	0.5		0	0	0	0.0328701	0	0.345435	0.358354	0.311613	0.350697	0.350265	0.28748	3.7901e-13	3.7901e-13	0.34635	0.28748	0	0.334068	0.293311	3.7901e-13	0.316228
EX_fucfucfucgalacglc13galacglcgal14acglcgalgluside_hs(e)		1	1	1	0.987656	1	0.764569	0.680027	0.848627	0.598473	0.594647	0.909091	1	1	0.580073	0.909091	1	0.540185	0.879473	1	0.5		0	0	0	0.0328701	0	0.345435	0.358354	0.311613	0.350697	0.350265	0.28748	3.7901e-13	3.7901e-13	0.34635	0.28748	0	0.334068	0.293311	3.7901e-13	0.316228
EX_fucfucfucgalacglcgal14acglcgalgluside_hs(e)		1	1	1	0.987656	1	0.764569	0.680027	0.848627	0.598473	0.594647	0.909091	1	1	0.580073	0.909091	1	0.540185	0.879473	1	0.5		0	0	0	0.0328701	0	0.345435	0.358354	0.311613	0.350697	0.350265	0.28748	3.7901e-13	3.7901e-13	0.34635	0.28748	0	0.334068	0.293311	3.7901e-13	0.316228
EX_fucfucgalacglcgalgluside_hs(e)		1	1	1	0.987656	1	0.764569	0.680027	0.848627	0.598473	0.594647	0.909091	1	1	0.580073	0.909091	1	0.540185	0.879473	1	0.5		0	0	0	0.0328701	0	0.345435	0.358354	0.311613	0.350697	0.350265	0.28748	3.7901e-13	3.7901e-13	0.34635	0.28748	0	0.334068	0.293311	3.7901e-13	0.316228
EX_fucgal14acglcgalgluside_hs(e)		1	1	1	0.987656	1	0.764569	0.680027	0.848627	0.598473	0.594647	0.909091	1	1	0.580073	0.909091	1	0.540185	0.879473	1	0.5		0	0	0	0.0328701	0	0.345435	0.358354	0.311613	0.350697	0.350265	0.28748	3.7901e-13	3.7901e-13	0.34635	0.28748	0	0.334068	0.293311	3.7901e-13	0.316228
EX_fucgalfucgalacglcgalgluside_hs(e)		1	1	1	0.987656	1	0.764569	0.680027	0.848627	0.598473	0.594647	0.909091	1	1	0.580073	0.909091	1	0.540185	0.879473	1	0.5		0	0	0	0.0328701	0	0.345435	0.358354	0.311613	0.350697	0.350265	0.28748	3.7901e-13	3.7901e-13	0.34635	0.28748	0	0.334068	0.293311	3.7901e-13	0.316228
EX_fucgalgbside_hs(e)		1	1	1	0.987656	1	0.764569	0.680027	0.848627	0.598473	0.594647	0.909091	1	1	0.580073	0.909091	1	0.540185	0.879473	1	0.5		0	0	0	0.0328701	0	0.345435	0.358354	0.311613	0.350697	0.350265	0.28748	3.7901e-13	3.7901e-13	0.34635	0.28748	0	0.334068	0.293311	3.7901e-13	0.316228
EX_gal(e)		1	1	1	0.987656	1	0.764569	0.680027	0.848627	0.598473	0.594647	0.909091	0.958993	0.959013	0.580073	0.909091	1	0.540185	0.879473	0.958993	0.5		0	0	0	0.0328701	0	0.345435	0.358354	0.311613	0.350697	0.350265	0.28748	0.129674	0.129611	0.34635	0.28748	0	0.334068	0.293311	0.129674	0.316228
EX_galacglcgalgbside_hs(e)		1	1	1	0.987656	1	0.764569	0.680027	0.848627	0.598473	0.594647	0.909091	1	1	0.580073	0.909091	1	0.540185	0.879473	1	0.5		0	0	0	0.0328701	0	0.345435	0.358354	0.311613	0.350697	0.350265	0.28748	3.7901e-13	3.7901e-13	0.34635	0.28748	0	0.334068	0.293311	3.7901e-13	0.316228
EX_galfuc12gal14acglcgalgluside_hs(e)		1	1	1	0.987656	1	0.764569	0.680027	0.848627	0.598473	0.594647	0.909091	1	1	0.580073	0.909091	1	0.540185	0.879473	1	0.5		0	0	0	0.0328701	0	0.345435	0.358354	0.311613	0.350697	0.350265	0.28748	3.7901e-13	3.7901e-13	0.34635	0.28748	0	0.334068	0.293311	3.7901e-13	0.316228
EX_galfucgalacglcgal14acglcgalgluside_hs(e)		1	1	1	0.987656	1	0.764569	0.680027	0.848627	0.598473	0.594647	0.909091	1	1	0.580073	0.909091	1	0.540185	0.879473	1	0.5		0	0	0	0.0328701	0	0.345435	0.358354	0.311613	0.350697	0.350265	0.28748	3.7901e-13	3.7901e-13	0.34635	0.28748	0	0.334068	0.293311	3.7901e-13	0.316228
EX_galgalfucfucgalacglcgalacglcgal14acglcgalgluside_hs(e)		1	1	1	0.987656	1	0.764569	0.680027	0.848627	0.598473	0.594647	0.909091	1	1	0.580073	0.909091	1	0.540185	0.879473	1	0.5		0	0	0	0.0328701	0	0.345435	0.358354	0.311613	0.350697	0.350265	0.28748	3.7901e-13	3.7901e-13	0.34635	0.28748	0	0.334068	0.293311	3.7901e-13	0.316228
EX_galgalgalthcrm_hs(e)		1	1	1	0.987656	1	0.764569	0.680027	0.848627	0.598473	0.594647	0.909091	1	1	0.580073	0.909091	1	0.540185	0.879473	1	0.5		0	0	0	0.0328701	0	0.345435	0.358354	0.311613	0.350697	0.350265	0.28748	3.7901e-13	3.7901e-13	0.34635	0.28748	0	0.334068	0.293311	3.7901e-13	0.316228
EX_gam(e)		1	1	1	0.987656	1	0.764569	0.680027	0.848627	0.598473	0.594647	0.909091	1	1	0.580073	0.909091	1	0.540185	0.879473	1	0.5		0	0	0	0.0328701	0	0.345435	0.358354	0.311613	0.350697	0.350265	0.28748	3.7901e-13	3.7901e-13	0.34635	0.28748	0	0.334068	0.293311	3.7901e-13	0.316228
EX_gbside_hs(e)		1	1	1	0.987656	1	0.764569	0.680027	0.848627	0.598473	0.594647	0.909091	1	1	0.580073	0.909091	1	0.540185	0.879473	1	0.5		0	0	0	0.0328701	0	0.345435	0.358354	0.311613	0.350697	0.350265	0.28748	3.7901e-13	3.7901e-13	0.34635	0.28748	0	0.334068	0.293311	3.7901e-13	0.316228
EX_gchola(e)		1	1	1	0.987656	1	0.764569	0.680027	0.848627	0.598473	0.594647	0.909091	1	1	0.580073	0.909091	1	0.540185	0.879473	1	0.5		0	0	0	0.0328701	0	0.345435	0.358354	0.311613	0.350697	0.350265	0.28748	3.7901e-13	3.7901e-13	0.34635	0.28748	0	0.334068	0.293311	3.7901e-13	0.316228
EX_gd1b2_hs(e)		1	1	1	0.987656	1	0.764569	0.680027	0.848627	0.598473	0.594647	0.909091	1	1	0.580073	0.909091	1	0.540185	0.879473	1	0.5		0	0	0	0.0328701	0	0.345435	0.358354	0.311613	0.350697	0.350265	0.28748	3.7901e-13	3.7901e-13	0.34635	0.28748	0	0.334068	0.293311	3.7901e-13	0.316228
EX_gd1c_hs(e)		1	1	1	0.987656	1	0.764569	0.680027	0.848627	0.598473	0.594647	0.909091	1	1	0.580073	0.909091	1	0.540185	0.879473	1	0.5		0	0	0	0.0328701	0	0.345435	0.358354	0.311613	0.350697	0.350265	0.28748	3.7901e-13	3.7901e-13	0.34635	0.28748	0	0.334068	0.293311	3.7901e-13	0.316228
EX_gdchola(e)		1	1	1	0.987656	1	0.764569	0.680027	0.848627	0.598473	0.594647	0.909091	1	1	0.580073	0.909091	1	0.540185	0.879473	1	0.5		0	0	0	0.0328701	0	0.345435	0.358354	0.311613	0.350697	0.350265	0.28748	3.7901e-13	3.7901e-13	0.34635	0.28748	0	0.334068	0.293311	3.7901e-13	0.316228
EX_gdp(e)		1	1	1	0.987656	1	0.764569	0.680027	0.848627	0.598473	0.594647	0.909091	1	1	0.580073	0.909091	1	0.540185	0.879473	1	0.5		0	0	0	0.0328701	0	0.345435	0.358354	0.311613	0.350697	0.350265	0.28748	3.7901e-13	3.7901e-13	0.34635	0.28748	0	0.334068	0.293311	3.7901e-13	0.316228
EX_glc(e)		1	1	1	0.987656	1	0.764569	0.680027	0.848627	0.598473	0.594647	0.909091	0.955178	0.955236	0.580073	0.909091	1	0.540185	0.879473	0.955178	0.5		0	0	0	0.0328701	0	0.345435	0.358354	0.311613	0.350697	0.350265	0.28748	0.14174	0.141556	0.34635	0.28748	0	0.334068	0.293311	0.14174	0.316228
EX_gln-L(e)		1	1	1	0.987656	1	0.764569	0.680027	0.815713	0.590283	0.594647	0.909091	0.954545	0.954545	0.571045	0.909091	1	0.540185	0.876902	0.954545	0.5		0	0	0	0.0328701	0	0.345435	0.358354	0.32077	0.348784	0.350265	0.28748	0.14374	0.14374	0.343571	0.28748	0	0.334068	0.295217	0.14374	0.316228
EX_glu-L(e)		1	1	1	0.987656	1	0.764569	0.680027	0.815713	0.590283	0.594647	0.909091	0.954545	0.954545	0.571045	0.909091	1	0.540185	0.876902	0.954545	0.5		0	0	0	0.0328701	0	0.345435	0.358354	0.32077	0.348784	0.350265	0.28748	0.14374	0.14374	0.343571	0.28748	0	0.334068	0.295217	0.14374	0.316228
EX_gluala(e)		1	1	1	0.987656	1	0.764569	0.680027	0.815713	0.590283	0.594647	0.909091	0.954545	0.954545	0.571045	0.909091	1	0.540185	0.876902	0.954545	0.5		0	0	0	0.0328701	0	0.345435	0.358354	0.32077	0.348784	0.350265	0.28748	0.14374	0.14374	0.343571	0.28748	0	0.334068	0.295217	0.14374	0.316228
EX_gly(e)		1	1	1	0.987656	1	0.764569	0.680027	0.815713	0.590283	0.594647	0.909091	0.954545	0.954545	0.571045	0.909091	1	0.540185	0.876902	0.954545	0.5		0	0	0	0.0328701	0	0.345435	0.358354	0.32077	0.348784	0.350265	0.28748	0.14374	0.14374	0.343571	0.28748	0	0.334068	0.295217	0.14374	0.316228
EX_glyb(e)		1	1	1	0.987656	1	0.764569	0.680027	0.848627	0.598473	0.594647	0.909091	0.954552	0.954552	0.580073	0.909091	1	0.540185	0.879473	0.954552	0.5		0	0	0	0.0328701	0	0.345435	0.358354	0.311613	0.350697	0.350265	0.28748	0.14372	0.14372	0.34635	0.28748	0	0.334068	0.293311	0.14372	0.316228
EX_glyc(e)		1	1	1	0.987656	1	0.764569	0.680027	0.848627	0.598473	0.594647	0.909091	0.966093	0.966603	0.580073	0.909091	1	0.540185	0.879473	0.966373	0.5		0	0	0	0.0328701	0	0.345435	0.358354	0.311613	0.350697	0.350265	0.28748	0.107223	0.10561	0.34635	0.28748	0	0.334068	0.293311	0.106337	0.316228
EX_glyc-S(e)		1	1	1	0.987656	1	0.764569	0.680027	0.848627	0.598473	0.594647	0.909091	1	1	0.580073	0.909091	1	0.540185	0.879473	1	0.5		0	0	0	0.0328701	0	0.345435	0.358354	0.311613	0.350697	0.350265	0.28748	3.7901e-13	3.7901e-13	0.34635	0.28748	0	0.334068	0.293311	3.7901e-13	0.316228
EX_glygn2(e)		1	1	1	0.987656	1	0.764569	0.680027	0.848627	0.598473	0.594647	0.909091	1	1	0.580073	0.909091	1	0.540185	0.879473	1	0.5		0	0	0	0.0328701	0	0.345435	0.358354	0.311613	0.350697	0.350265	0.28748	3.7901e-13	3.7901e-13	0.34635	0.28748	0	0.334068	0.293311	3.7901e-13	0.316228
EX_glygn4(e)		1	1	1	0.987656	1	0.764569	0.680027	0.848627	0.598473	0.594647	0.909091	1	1	0.580073	0.909091	1	0.540185	0.879473	1	0.5		0	0	0	0.0328701	0	0.345435	0.358354	0.311613	0.350697	0.350265	0.28748	3.7901e-13	3.7901e-13	0.34635	0.28748	0	0.334068	0.293311	3.7901e-13	0.316228
EX_glygn5(e)		1	1	1	0.987656	1	0.764569	0.680027	0.848627	0.598473	0.594647	0.909091	1	1	0.580073	0.909091	1	0.540185	0.879473	1	0.5		0	0	0	0.0328701	0	0.345435	0.358354	0.311613	0.350697	0.350265	0.28748	3.7901e-13	3.7901e-13	0.34635	0.28748	0	0.334068	0.293311	3.7901e-13	0.316228
EX_gmp(e)		1	1	1	0.987656	1	0.764569	0.680027	0.848627	0.598473	0.594647	0.909091	1	1	0.580073	0.909091	1	0.540185	0.879473	1	0.5		0	0	0	0.0328701	0	0.345435	0.358354	0.311613	0.350697	0.350265	0.28748	3.7901e-13	3.7901e-13	0.34635	0.28748	0	0.334068	0.293311	3.7901e-13	0.316228
EX_gp1c_hs(e)		1	1	1	0.987656	1	0.764569	0.680027	0.848627	0.598473	0.594647	0.909091	1	1	0.580073	0.909091	1	0.540185	0.879473	1	0.5		0	0	0	0.0328701	0	0.345435	0.358354	0.311613	0.350697	0.350265	0.28748	3.7901e-13	3.7901e-13	0.34635	0.28748	0	0.334068	0.293311	3.7901e-13	0.316228
EX_gp1calpha_hs(e)		1	1	1	0.987656	1	0.764569	0.680027	0.848627	0.598473	0.594647	0.909091	1	1	0.580073	0.909091	1	0.540185	0.879473	1	0.5		0	0	0	0.0328701	0	0.345435	0.358354	0.311613	0.350697	0.350265	0.28748	3.7901e-13	3.7901e-13	0.34635	0.28748	0	0.334068	0.293311	3.7901e-13	0.316228
EX_gq1b_hs(e)		1	1	1	0.987656	1	0.764569	0.680027	0.848627	0.598473	0.594647	0.909091	1	1	0.580073	0.909091	1	0.540185	0.879473	1	0.5		0	0	0	0.0328701	0	0.345435	0.358354	0.311613	0.350697	0.350265	0.28748	3.7901e-13	3.7901e-13	0.34635	0.28748	0	0.334068	0.293311	3.7901e-13	0.316228
EX_gq1balpha_hs(e)		1	1	1	0.987656	1	0.764569	0.680027	0.848627	0.598473	0.594647	0.909091	1	1	0.580073	0.909091	1	0.540185	0.879473	1	0.5		0	0	0	0.0328701	0	0.345435	0.358354	0.311613	0.350697	0.350265	0.28748	3.7901e-13	3.7901e-13	0.34635	0.28748	0	0.334068	0.293311	3.7901e-13	0.316228
EX_gsn(e)		1	1	1	0.987656	1	0.764569	0.680027	0.815713	0.590283	0.594647	0.909091	0.954545	0.954545	0.571045	0.909091	1	0.540185	0.876902	0.954545	0.5		0	0	0	0.0328701	0	0.345435	0.358354	0.32077	0.348784	0.350265	0.28748	0.14374	0.14374	0.343571	0.28748	0	0.334068	0.295217	0.14374	0.316228
EX_gt1a_hs(e)		1	1	1	0.987656	1	0.764569	0.680027	0.848627	0.598473	0.594647	0.909091	1	1	0.580073	0.909091	1	0.540185	0.879473	1	0.5		0	0	0	0.0328701	0	0.345435	0.358354	0.311613	0.350697	0.350265	0.28748	3.7901e-13	3.7901e-13	0.34635	0.28748	0	0.334068	0.293311	3.7901e-13	0.316228
EX_gthox(e)		1	1	1	0.987656	1	0.764569	0.680027	0.848627	0.598473	0.594647	0.909091	1	1	0.580073	0.909091	1	0.540185	0.879473	1	0.5		0	0	0	0.0328701	0	0.345435	0.358354	0.311613	0.350697	0.350265	0.28748	3.7901e-13	3.7901e-13	0.34635	0.28748	0	0.334068	0.293311	3.7901e-13	0.316228
EX_gthrd(e)		1	1	1	0.987656	1	0.764569	0.680027	0.848627	0.598473	0.594647	0.909091	1	1	0.580073	0.909091	1	0.540185	0.879473	1	0.5		0	0	0	0.0328701	0	0.345435	0.358354	0.311613	0.350697	0.350265	0.28748	3.7901e-13	3.7901e-13	0.34635	0.28748	0	0.334068	0.293311	3.7901e-13	0.316228
EX_gtp(e)		1	1	1	0.987656	1	0.764569	0.680027	0.848627	0.598473	0.594647	0.909091	1	1	0.580073	0.909091	1	0.540185	0.879473	1	0.5		0	0	0	0.0328701	0	0.345435	0.358354	0.311613	0.350697	0.350265	0.28748	3.7901e-13	3.7901e-13	0.34635	0.28748	0	0.334068	0.293311	3.7901e-13	0.316228
EX_gua(e)		1	1	1	0.987656	1	0.764569	0.680027	0.815713	0.590283	0.594647	0.909091	0.954545	0.954545	0.571045	0.909091	1	0.540185	0.876902	0.954545	0.5		0	0	0	0.0328701	0	0.345435	0.358354	0.32077	0.348784	0.350265	0.28748	0.14374	0.14374	0.343571	0.28748	0	0.334068	0.295217	0.14374	0.316228
EX_h(e)		1	1	1	0.987656	1	0.764569	0.680027	0.835826	0.598473	0.594647	0.900635	0.954902	0.964922	0.580073	0.909091	1	0.540185	0.879473	0.954545	0.5		0	0	0	0.0328701	0	0.345435	0.358354	0.318822	0.350697	0.350265	0.285776	0.142613	0.110927	0.34635	0.28748	0	0.334068	0.293311	0.14374	0.316228
EX_h2o(e)		1	1	1	0.987656	1	0.764569	0.680027	0.848627	0.598473	0.594647	0.909091	0.954575	0.954649	0.580073	0.909091	1	0.540185	0.879473	0.954661	0.5		0	0	0	0.0328701	0	0.345435	0.358354	0.311613	0.350697	0.350265	0.28748	0.143646	0.143411	0.34635	0.28748	0	0.334068	0.293311	0.143374	0.316228
EX_h2o2(e)		1	1	1	0.987656	1	0.764569	0.680027	0.848627	0.598473	0.594647	0.909091	0.954545	0.954545	0.580073	0.909091	1	0.540185	0.879473	0.954545	0.5		0	0	0	0.0328701	0	0.345435	0.358354	0.311613	0.350697	0.350265	0.28748	0.14374	0.14374	0.34635	0.28748	0	0.334068	0.293311	0.14374	0.316228
EX_ha(e)		1	1	1	0.987656	1	0.764569	0.680027	0.848627	0.598473	0.594647	0.909091	0.959005	0.95929	0.580073	0.909091	1	0.540185	0.879473	0.959005	0.5		0	0	0	0.0328701	0	0.345435	0.358354	0.311613	0.350697	0.350265	0.28748	0.129638	0.128735	0.34635	0.28748	0	0.334068	0.293311	0.129638	0.316228
EX_ha_pre1(e)		1	1	1	0.987656	1	0.764569	0.680027	0.848627	0.598473	0.594647	0.909091	0.959005	0.95929	0.580073	0.909091	1	0.540185	0.879473	0.959005	0.5		0	0	0	0.0328701	0	0.345435	0.358354	0.311613	0.350697	0.350265	0.28748	0.129638	0.128735	0.34635	0.28748	0	0.334068	0.293311	0.129638	0.316228
EX_hco3(e)		1	1	1	0.987656	1	0.764569	0.680027	0.848627	0.598473	0.594647	0.90897	0.955885	0.954648	0.580073	0.909091	1	0.540185	0.879473	0.957292	0.5		0	0	0	0.0328701	0	0.345435	0.358354	0.311613	0.350697	0.350265	0.287442	0.139505	0.143415	0.34635	0.28748	0	0.334068	0.293311	0.135055	0.316228
EX_hcoumarin(e)		1	1	1	0.987656	1	0.764569	0.680027	0.848627	0.598473	0.594647	0.909091	1	1	0.580073	0.909091	1	0.540185	0.879473	1	0.5		0	0	0	0.0328701	0	0.345435	0.358354	0.311613	0.350697	0.350265	0.28748	3.7901e-13	3.7901e-13	0.34635	0.28748	0	0.334068	0.293311	3.7901e-13	0.316228
EX_hdca(e)		1	1	1	0.987656	1	0.764569	0.680027	0.837309	0.598473	0.594647	0.909091	0.970182	0.972557	0.580073	0.909091	1	0.540185	0.879473	0.954823	0.5		0	0	0	0.0328701	0	0.345435	0.358354	0.314969	0.350697	0.350265	0.28748	0.0942938	0.086784	0.34635	0.28748	0	0.334068	0.293311	0.142863	0.316228
EX_hdcea(e)		1	1	1	0.987656	1	0.764569	0.680027	0.848627	0.598473	0.594647	0.909091	0.970678	0.969695	0.580073	0.909091	1	0.540185	0.879473	0.963819	0.5		0	0	0	0.0328701	0	0.345435	0.358354	0.311613	0.350697	0.350265	0.28748	0.0927249	0.0958315	0.34635	0.28748	0	0.334068	0.293311	0.114414	0.316228
EX_hestratriol(e)		1	1	1	0.987656	1	0.764569	0.680027	0.848627	0.598473	0.594647	0.909091	1	1	0.580073	0.909091	1	0.540185	0.879473	1	0.5		0	0	0	0.0328701	0	0.345435	0.358354	0.311613	0.350697	0.350265	0.28748	3.7901e-13	3.7901e-13	0.34635	0.28748	0	0.334068	0.293311	3.7901e-13	0.316228
EX_hexc(e)		1	1	1	0.987656	1	0.764569	0.680027	0.848627	0.598473	0.594647	0.909091	1	1	0.580073	0.909091	1	0.540185	0.879473	1	0.5		0	0	0	0.0328701	0	0.345435	0.358354	0.311613	0.350697	0.350265	0.28748	3.7901e-13	3.7901e-13	0.34635	0.28748	0	0.334068	0.293311	3.7901e-13	0.316228
EX_his-L(e)		1	1	1	0.987656	1	0.764569	0.658227	0.802201	0.56028	0.594647	0.909091	0.954545	0.954545	0.540267	0.909091	1	0.540185	0.873021	0.954545	0.5		0	0	0	0.0328701	0	0.345435	0.356873	0.321534	0.33733	0.350265	0.28748	0.14374	0.14374	0.330521	0.28748	0	0.334068	0.298491	0.14374	0.316228
EX_hista(e)		1	1	1	0.987656	1	0.764569	0.658227	0.802201	0.56028	0.594647	0.909091	0.954545	0.954545	0.540267	0.909091	1	0.540185	0.873021	0.954545	0.5		0	0	0	0.0328701	0	0.345435	0.356873	0.321534	0.33733	0.350265	0.28748	0.14374	0.14374	0.330521	0.28748	0	0.334068	0.298491	0.14374	0.316228
EX_hom-L(e)		1	1	1	0.987656	1	0.764569	0.680027	0.848627	0.598473	0.594647	0.909091	1	1	0.580073	0.909091	1	0.540185	0.879473	1	0.5		0	0	0	0.0328701	0	0.345435	0.358354	0.311613	0.350697	0.350265	0.28748	3.7901e-13	3.7901e-13	0.34635	0.28748	0	0.334068	0.293311	3.7901e-13	0.316228
EX_hpdca(e)		1	1	1	0.987656	1	0.764569	0.680027	0.848627	0.598473	0.594647	0.909091	1	1	0.580073	0.909091	1	0.540185	0.879473	1	0.5		0	0	0	0.0328701	0	0.345435	0.358354	0.311613	0.350697	0.350265	0.28748	3.7901e-13	3.7901e-13	0.34635	0.28748	0	0.334068	0.293311	3.7901e-13	0.316228
EX_hspg(e)		1	1	1	0.987656	1	0.764569	0.680027	0.848627	0.598473	0.594647	0.909091	1	1	0.580073	0.909091	1	0.540185	0.879473	1	0.5		0	0	0	0.0328701	0	0.345435	0.358354	0.311613	0.350697	0.350265	0.28748	3.7901e-13	3.7901e-13	0.34635	0.28748	0	0.334068	0.293311	3.7901e-13	0.316228
EX_hxan(e)		1	1	1	0.987656	1	0.764569	0.680027	0.815713	0.590283	0.594647	0.909091	0.954545	0.954545	0.571045	0.909091	1	0.540185	0.876902	0.954545	0.5		0	0	0	0.0328701	0	0.345435	0.358354	0.32077	0.348784	0.350265	0.28748	0.14374	0.14374	0.343571	0.28748	0	0.334068	0.295217	0.14374	0.316228
EX_i(e)		1	1	1	0.987656	1	0.764569	0.680027	0.848627	0.598473	0.594647	0.909091	1	1	0.580073	0.909091	1	0.540185	0.879473	1	0.5		0	0	0	0.0328701	0	0.345435	0.358354	0.311613	0.350697	0.350265	0.28748	3.7901e-13	3.7901e-13	0.34635	0.28748	0	0.334068	0.293311	3.7901e-13	0.316228
EX_idp(e)		1	1	1	0.987656	1	0.764569	0.680027	0.848627	0.598473	0.594647	0.909091	1	1	0.580073	0.909091	1	0.540185	0.879473	1	0.5		0	0	0	0.0328701	0	0.345435	0.358354	0.311613	0.350697	0.350265	0.28748	3.7901e-13	3.7901e-13	0.34635	0.28748	0	0.334068	0.293311	3.7901e-13	0.316228
EX_ile-L(e)		0	0	0.318673	0.169432	0	0	0.316391	0.179313	0.408365	0	0.398643	0.0454545	0.0454545	0.389132	0	0	0	0.0587066	0.0454545	0		0	0	0.423146	0.359967	0	0	0.356532	0.315769	0.348373	0	0.439257	0.14374	0.14374	0.332812	0	0	0	0.185647	0.14374	0
EX_imp(e)		1	1	1	0.987656	1	0.764569	0.680027	0.848627	0.598473	0.594647	0.909091	1	1	0.580073	0.909091	1	0.540185	0.879473	1	0.5		0	0	0	0.0328701	0	0.345435	0.358354	0.311613	0.350697	0.350265	0.28748	3.7901e-13	3.7901e-13	0.34635	0.28748	0	0.334068	0.293311	3.7901e-13	0.316228
EX_inost(e)		1	1	1	0.987656	1	0.764569	0.680027	0.848627	0.598473	0.594647	0.909091	0.954732	0.954835	0.580073	0.909091	1	0.540185	0.879473	0.954732	0.5		0	0	0	0.0328701	0	0.345435	0.358354	0.311613	0.350697	0.350265	0.28748	0.143149	0.142825	0.34635	0.28748	0	0.334068	0.293311	0.143149	0.316228
EX_ins(e)		1	1	1	0.987656	1	0.764569	0.680027	0.815713	0.590283	0.594647	0.909091	0.954545	0.954545	0.571045	0.909091	1	0.540185	0.876902	0.954545	0.5		0	0	0	0.0328701	0	0.345435	0.358354	0.32077	0.348784	0.350265	0.28748	0.14374	0.14374	0.343571	0.28748	0	0.334068	0.295217	0.14374	0.316228
EX_k(e)		1	1	1	0.987656	1	0.764569	0.680027	0.848627	0.598473	0.594647	0.909091	1	1	0.580073	0.909091	1	0.540185	0.879473	1	0.5		0	0	0	0.0328701	0	0.345435	0.358354	0.311613	0.350697	0.350265	0.28748	3.7901e-13	3.7901e-13	0.34635	0.28748	0	0.334068	0.293311	3.7901e-13	0.316228
EX_ksi(e)		1	1	1	0.987656	1	0.764569	0.680027	0.848627	0.598473	0.594647	0.909091	1	1	0.580073	0.909091	1	0.540185	0.879473	1	0.5		0	0	0	0.0328701	0	0.345435	0.358354	0.311613	0.350697	0.350265	0.28748	3.7901e-13	3.7901e-13	0.34635	0.28748	0	0.334068	0.293311	3.7901e-13	0.316228
EX_ksi_deg1(e)		1	1	1	0.987656	1	0.764569	0.680027	0.848627	0.598473	0.594647	0.909091	1	1	0.580073	0.909091	1	0.540185	0.879473	1	0.5		0	0	0	0.0328701	0	0.345435	0.358354	0.311613	0.350697	0.350265	0.28748	3.7901e-13	3.7901e-13	0.34635	0.28748	0	0.334068	0.293311	3.7901e-13	0.316228
EX_ksii_core2(e)		1	1	1	0.987656	1	0.764569	0.680027	0.848627	0.598473	0.594647	0.909091	1	1	0.580073	0.909091	1	0.540185	0.879473	1	0.5		0	0	0	0.0328701	0	0.345435	0.358354	0.311613	0.350697	0.350265	0.28748	3.7901e-13	3.7901e-13	0.34635	0.28748	0	0.334068	0.293311	3.7901e-13	0.316228
EX_ksii_core4(e)		1	1	1	0.987656	1	0.764569	0.680027	0.848627	0.598473	0.594647	0.909091	1	1	0.580073	0.909091	1	0.540185	0.879473	1	0.5		0	0	0	0.0328701	0	0.345435	0.358354	0.311613	0.350697	0.350265	0.28748	3.7901e-13	3.7901e-13	0.34635	0.28748	0	0.334068	0.293311	3.7901e-13	0.316228
EX_lac-D(e)		1	1	1	0.987656	1	0.764569	0.680027	0.848627	0.598473	0.594647	0.909091	0.956831	0.956785	0.580073	0.909091	1	0.540185	0.879473	0.956831	0.5		0	0	0	0.0328701	0	0.345435	0.358354	0.311613	0.350697	0.350265	0.28748	0.136512	0.136658	0.34635	0.28748	0	0.334068	0.293311	0.136512	0.316228
EX_lac-L(e)		1	1	1	0.987656	1	0.764569	0.680027	0.848627	0.598473	0.594647	0.908034	0.954738	0.954876	0.580073	0.909091	1	0.540185	0.879473	0.954545	0.5		0	0	0	0.0328701	0	0.345435	0.358354	0.311613	0.350697	0.350265	0.287165	0.14313	0.142695	0.34635	0.28748	0	0.334068	0.293311	0.14374	0.316228
EX_lcts(e)		1	1	1	0.987656	1	0.764569	0.680027	0.848627	0.598473	0.594647	0.909091	0.959063	0.959268	0.580073	0.909091	1	0.540185	0.879473	0.959063	0.5		0	0	0	0.0328701	0	0.345435	0.358354	0.311613	0.350697	0.350265	0.28748	0.129454	0.128807	0.34635	0.28748	0	0.334068	0.293311	0.129454	0.316228
EX_leu-L(e)		1	1	0.99902	0.987656	1	0.764569	0.680027	0.848627	0.598473	0.594647	0.905451	0.954545	0.954545	0.580073	0.909091	1	0.540185	0.879473	0.954545	0.5		0	0	0.00309872	0.0328701	0	0.345435	0.358354	0.311613	0.350697	0.350265	0.286558	0.14374	0.14374	0.34635	0.28748	0	0.334068	0.293311	0.14374	0.316228
EX_leuktrA4(e)		1	1	1	0.987656	1	0.764569	0.680027	0.848627	0.598473	0.594647	0.909091	1	1	0.580073	0.909091	1	0.540185	0.879473	1	0.5		0	0	0	0.0328701	0	0.345435	0.358354	0.311613	0.350697	0.350265	0.28748	3.7901e-13	3.7901e-13	0.34635	0.28748	0	0.334068	0.293311	3.7901e-13	0.316228
EX_leuktrB4(e)		1	1	1	0.987656	1	0.764569	0.680027	0.848627	0.598473	0.594647	0.909091	1	1	0.580073	0.909091	1	0.540185	0.879473	1	0.5		0	0	0	0.0328701	0	0.345435	0.358354	0.311613	0.350697	0.350265	0.28748	3.7901e-13	3.7901e-13	0.34635	0.28748	0	0.334068	0.293311	3.7901e-13	0.316228
EX_leuktrC4(e)		1	1	1	0.987656	1	0.764569	0.680027	0.848627	0.598473	0.594647	0.909091	1	1	0.580073	0.909091	1	0.540185	0.879473	1	0.5		0	0	0	0.0328701	0	0.345435	0.358354	0.311613	0.350697	0.350265	0.28748	3.7901e-13	3.7901e-13	0.34635	0.28748	0	0.334068	0.293311	3.7901e-13	0.316228
EX_leuktrD4(e)		1	1	1	0.987656	1	0.764569	0.680027	0.848627	0.598473	0.594647	0.909091	1	1	0.580073	0.909091	1	0.540185	0.879473	1	0.5		0	0	0	0.0328701	0	0.345435	0.358354	0.311613	0.350697	0.350265	0.28748	3.7901e-13	3.7901e-13	0.34635	0.28748	0	0.334068	0.293311	3.7901e-13	0.316228
EX_leuktrE4(e)		1	1	1	0.987656	1	0.764569	0.680027	0.848627	0.598473	0.594647	0.909091	1	1	0.580073	0.909091	1	0.540185	0.879473	1	0.5		0	0	0	0.0328701	0	0.345435	0.358354	0.311613	0.350697	0.350265	0.28748	3.7901e-13	3.7901e-13	0.34635	0.28748	0	0.334068	0.293311	3.7901e-13	0.316228
EX_leuktrF4(e)		1	1	1	0.987656	1	0.764569	0.680027	0.848627	0.598473	0.594647	0.909091	1	1	0.580073	0.909091	1	0.540185	0.879473	1	0.5		0	0	0	0.0328701	0	0.345435	0.358354	0.311613	0.350697	0.350265	0.28748	3.7901e-13	3.7901e-13	0.34635	0.28748	0	0.334068	0.293311	3.7901e-13	0.316228
EX_lgnc(e)		1	1	1	0.987656	1	0.764569	0.680027	0.848627	0.598473	0.594647	0.909091	1	1	0.580073	0.909091	1	0.540185	0.879473	1	0.5		0	0	0	0.0328701	0	0.345435	0.358354	0.311613	0.350697	0.350265	0.28748	3.7901e-13	3.7901e-13	0.34635	0.28748	0	0.334068	0.293311	3.7901e-13	0.316228
EX_lipoate(e)		1	1	1	0.987656	1	0.764569	0.680027	0.848627	0.598473	0.594647	0.909091	1	1	0.580073	0.909091	1	0.540185	0.879473	1	0.5		0	0	0	0.0328701	0	0.345435	0.358354	0.311613	0.350697	0.350265	0.28748	3.7901e-13	3.7901e-13	0.34635	0.28748	0	0.334068	0.293311	3.7901e-13	0.316228
EX_lneldc(e)		1	1	1	0.987656	1	0.764569	0.680027	0.844483	0.598473	0.594647	0.909091	0.967817	0.989008	0.580073	0.909091	1	0.540185	0.879473	0.962294	0.5		0	0	0	0.0328701	0	0.345435	0.358354	0.317206	0.350697	0.350265	0.28748	0.101771	0.0347612	0.34635	0.28748	0	0.334068	0.293311	0.119238	0.316228
EX_lnlc(e)		1	1	1	0.987656	1	0.764569	0.680027	0.848627	0.598473	0.594647	0.909091	1	1	0.580073	0.909091	1	0.540185	0.879473	1	0.5		0	0	0	0.0328701	0	0.345435	0.358354	0.311613	0.350697	0.350265	0.28748	3.7901e-13	3.7901e-13	0.34635	0.28748	0	0.334068	0.293311	3.7901e-13	0.316228
EX_lnlnca(e)		1	1	1	0.987656	1	0.764569	0.680027	0.848627	0.598473	0.594647	0.909091	1	1	0.580073	0.909091	1	0.540185	0.879473	1	0.5		0	0	0	0.0328701	0	0.345435	0.358354	0.311613	0.350697	0.350265	0.28748	3.7901e-13	3.7901e-13	0.34635	0.28748	0	0.334068	0.293311	3.7901e-13	0.316228
EX_lnlncg(e)		1	1	1	0.987656	1	0.764569	0.680027	0.848627	0.598473	0.594647	0.909091	1	1	0.580073	0.909091	1	0.540185	0.879473	1	0.5		0	0	0	0.0328701	0	0.345435	0.358354	0.311613	0.350697	0.350265	0.28748	3.7901e-13	3.7901e-13	0.34635	0.28748	0	0.334068	0.293311	3.7901e-13	0.316228
EX_lpchol_hs(e)		1	1	1	0.987656	1	0.764569	0.680027	0.848627	0.598473	0.594647	0.909091	0.954831	0.954857	0.580073	0.909091	1	0.540185	0.879473	0.954545	0.5		0	0	0	0.0328701	0	0.345435	0.358354	0.311613	0.350697	0.350265	0.28748	0.142836	0.142754	0.34635	0.28748	0	0.334068	0.293311	0.14374	0.316228
EX_lys-L(e)		0	0	0.325083	0	0	0	0	0.182741	0.325746	0	0.40667	0.0454545	0.0454545	0.398032	0	0	0	0.060021	0.0454545	0		0	0	0.431744	0	0	0	0	0.321948	0.319876	0	0.448241	0.14374	0.14374	0.340424	0	0	0	0.189803	0.14374	0
EX_mag_hs(e)		1	1	1	0.987656	1	0.764569	0.680027	0.848627	0.598473	0.594647	0.909091	0.966891	0.967542	0.580073	0.909091	1	0.540185	0.879473	0.970677	0.5		0	0	0	0.0328701	0	0.345435	0.358354	0.311613	0.350697	0.350265	0.28748	0.104701	0.102641	0.34635	0.28748	0	0.334068	0.293311	0.0927261	0.316228
EX_malt(e)		1	1	1	0.987656	1	0.764569	0.680027	0.848627	0.598473	0.594647	0.909091	1	1	0.580073	0.909091	1	0.540185	0.879473	1	0.5		0	0	0	0.0328701	0	0.345435	0.358354	0.311613	0.350697	0.350265	0.28748	3.7901e-13	3.7901e-13	0.34635	0.28748	0	0.334068	0.293311	3.7901e-13	0.316228
EX_man(e)		1	1	1	0.987656	1	0.764569	0.680027	0.848627	0.598473	0.594647	0.909091	0.95879	0.958985	0.580073	0.909091	1	0.540185	0.879473	0.95879	0.5		0	0	0	0.0328701	0	0.345435	0.358354	0.311613	0.350697	0.350265	0.28748	0.130316	0.129701	0.34635	0.28748	0	0.334068	0.293311	0.130316	0.316228
EX_meoh(e)		1	1	1	0.987656	1	0.764569	0.680027	0.848627	0.598473	0.594647	0.909091	0.956574	0.956474	0.580073	0.909091	1	0.540185	0.879473	0.956569	0.5		0	0	0	0.0328701	0	0.345435	0.358354	0.311613	0.350697	0.350265	0.28748	0.137325	0.13764	0.34635	0.28748	0	0.334068	0.293311	0.13734	0.316228
EX_mepi(e)		1	1	1	0.987656	1	0.764569	0.680027	0.848627	0.598473	0.594647	0.909091	1	1	0.580073	0.909091	1	0.540185	0.879473	1	0.5		0	0	0	0.0328701	0	0.345435	0.358354	0.311613	0.350697	0.350265	0.28748	3.7901e-13	3.7901e-13	0.34635	0.28748	0	0.334068	0.293311	3.7901e-13	0.316228
EX_mercplaccys(e)		0.933124	0.933124	0.969602	0.908343	0.933124	0.713331	0.615497	0.751556	0.525155	0.575543	0.890852	0.893749	0.893749	0.506598	0.848295	0.933124	0.521761	0.815045	0.893749	0.478414		0	0	0.0332994	0.0488598	0	0.322347	0.333016	0.298862	0.315508	0.329028	0.283224	0.124514	0.124514	0.309332	0.268254	0	0.316864	0.278163	0.124514	0.300164
EX_met-L(e)		0.933124	0.933124	0.870553	0.939019	0.933124	0.713331	0.615497	0.751556	0.525155	0.575543	0.77508	0.893749	0.893749	0.506598	0.848295	0.933124	0.521761	0.815045	0.893749	0.478414		0	0	0.0748382	0.0276901	0	0.322347	0.333016	0.298862	0.315508	0.329028	0.257031	0.124514	0.124514	0.309332	0.268254	2.5423e-15	0.316864	0.278163	0.124514	0.300164
EX_mthgxl(e)		1	1	1	0.987656	1	0.764569	0.680027	0.848627	0.598473	0.594647	0.909091	0.956831	0.956785	0.580073	0.909091	1	0.540185	0.879473	0.956831	0.5		0	0	0	0.0328701	0	0.345435	0.358354	0.311613	0.350697	0.350265	0.28748	0.136512	0.136658	0.34635	0.28748	0	0.334068	0.293311	0.136512	0.316228
EX_n2m2nmasn(e)		1	1	1	0.987656	1	0.764569	0.680027	0.848627	0.598473	0.594647	0.909091	1	1	0.580073	0.909091	1	0.540185	0.879473	1	0.5		0	0	0	0.0328701	0	0.345435	0.358354	0.311613	0.350697	0.350265	0.28748	3.7901e-13	3.7901e-13	0.34635	0.28748	0	0.334068	0.293311	3.7901e-13	0.316228
EX_na1(e)		1	1	1	0.987656	1	0.764569	0.680027	0.848627	0.598473	0.594647	0.909091	1	1	0.580073	0.909091	1	0.540185	0.879473	1	0.5		0	0	0	0.0328701	0	0.345435	0.358354	0.311613	0.350697	0.350265	0.28748	3.7901e-13	3.7901e-13	0.34635	0.28748	0	0.334068	0.293311	3.7901e-13	0.316228
EX_nac(e)		1	1	1	0.987656	1	0.764569	0.680027	0.848627	0.598473	0.594647	0.909091	1	1	0.580073	0.909091	1	0.540185	0.879473	1	0.5		0	0	0	0.0328701	0	0.345435	0.358354	0.311613	0.350697	0.350265	0.28748	3.7901e-13	3.7901e-13	0.34635	0.28748	0	0.334068	0.293311	3.7901e-13	0.316228
EX_nad(e)		1	1	1	0.987656	1	0.764569	0.680027	0.848627	0.598473	0.594647	0.909091	1	1	0.580073	0.909091	1	0.540185	0.879473	1	0.5		0	0	0	0.0328701	0	0.345435	0.358354	0.311613	0.350697	0.350265	0.28748	3.7901e-13	3.7901e-13	0.34635	0.28748	0	0.334068	0.293311	3.7901e-13	0.316228
EX_nadp(e)		1	1	1	0.987656	1	0.764569	0.680027	0.848627	0.598473	0.594647	0.909091	1	1	0.580073	0.909091	1	0.540185	0.879473	1	0.5		0	0	0	0.0328701	0	0.345435	0.358354	0.311613	0.350697	0.350265	0.28748	3.7901e-13	3.7901e-13	0.34635	0.28748	0	0.334068	0.293311	3.7901e-13	0.316228
EX_ncam(e)		1	1	1	0.987656	1	0.764569	0.680027	0.848627	0.598473	0.594647	0.909091	1	1	0.580073	0.909091	1	0.540185	0.879473	1	0.5		0	0	0	0.0328701	0	0.345435	0.358354	0.311613	0.350697	0.350265	0.28748	3.7901e-13	3.7901e-13	0.34635	0.28748	0	0.334068	0.293311	3.7901e-13	0.316228
EX_nh4(e)		1	1	0.985373	0.987656	1	0.764569	0.680027	0.815713	0.590283	0.594647	0.909091	0.954545	0.954545	0.571045	0.909091	1	0.540185	0.876902	0.954545	0.5		0	0	0.0310863	0.0328701	0	0.345435	0.358354	0.32077	0.348784	0.350265	0.28748	0.14374	0.14374	0.343571	0.28748	0	0.334068	0.295217	0.14374	0.316228
EX_no(e)		1	1	1	0.987656	1	0.764569	0.680027	0.844333	0.598473	0.594647	0.909091	0.977517	0.977517	0.580073	0.909091	1	0.540185	0.879473	0.977517	0.5		0	0	0	0.0328701	0	0.345435	0.358354	0.317417	0.350697	0.350265	0.28748	0.0710977	0.0710977	0.34635	0.28748	0	0.334068	0.293311	0.0710977	0.316228
EX_npthl(e)		1	1	1	0.987656	1	0.764569	0.680027	0.848627	0.598473	0.594647	0.909091	1	1	0.580073	0.909091	1	0.540185	0.879473	1	0.5		0	0	0	0.0328701	0	0.345435	0.358354	0.311613	0.350697	0.350265	0.28748	3.7901e-13	3.7901e-13	0.34635	0.28748	0	0.334068	0.293311	3.7901e-13	0.316228
EX_nrpphr(e)		1	1	1	0.987656	1	0.764569	0.680027	0.848627	0.598473	0.594647	0.909091	1	1	0.580073	0.909091	1	0.540185	0.879473	1	0.5		0	0	0	0.0328701	0	0.345435	0.358354	0.311613	0.350697	0.350265	0.28748	3.7901e-13	3.7901e-13	0.34635	0.28748	0	0.334068	0.293311	3.7901e-13	0.316228
EX_nrpphrsf(e)		1	1	1	0.987656	1	0.764569	0.680027	0.848627	0.598473	0.594647	0.909091	1	1	0.580073	0.909091	1	0.540185	0.879473	1	0.5		0	0	0	0.0328701	0	0.345435	0.358354	0.311613	0.350697	0.350265	0.28748	3.7901e-13	3.7901e-13	0.34635	0.28748	0	0.334068	0.293311	3.7901e-13	0.316228
EX_nrvnc(e)		1	1	1	0.987656	1	0.764569	0.680027	0.848627	0.598473	0.594647	0.909091	1	1	0.580073	0.909091	1	0.540185	0.879473	1	0.5		0	0	0	0.0328701	0	0.345435	0.358354	0.311613	0.350697	0.350265	0.28748	3.7901e-13	3.7901e-13	0.34635	0.28748	0	0.334068	0.293311	3.7901e-13	0.316228
EX_o2(e)		1	1	1	0.987656	1	0.764569	0.680027	0.844333	0.598473	0.594647	0.909091	0.993183	0.993183	0.580073	0.909091	1	0.540185	0.879473	0.993183	0.5		0	0	0	0.0328701	0	0.345435	0.358354	0.317417	0.350697	0.350265	0.28748	0.0215561	0.0215561	0.34635	0.28748	0	0.334068	0.293311	0.0215561	0.316228
EX_o2s(e)		1	1	1	0.987656	1	0.764569	0.680027	0.848627	0.598473	0.594647	0.909091	0.954545	0.954545	0.580073	0.909091	1	0.540185	0.879473	0.954545	0.5		0	0	0	0.0328701	0	0.345435	0.358354	0.311613	0.350697	0.350265	0.28748	0.14374	0.14374	0.34635	0.28748	0	0.334068	0.293311	0.14374	0.316228
EX_oagd3_hs(e)		1	1	1	0.987656	1	0.764569	0.680027	0.848627	0.598473	0.594647	0.909091	1	1	0.580073	0.909091	1	0.540185	0.879473	1	0.5		0	0	0	0.0328701	0	0.345435	0.358354	0.311613	0.350697	0.350265	0.28748	3.7901e-13	3.7901e-13	0.34635	0.28748	0	0.334068	0.293311	3.7901e-13	0.316228
EX_oagt3_hs(e)		1	1	1	0.987656	1	0.764569	0.680027	0.848627	0.598473	0.594647	0.909091	1	1	0.580073	0.909091	1	0.540185	0.879473	1	0.5		0	0	0	0.0328701	0	0.345435	0.358354	0.311613	0.350697	0.350265	0.28748	3.7901e-13	3.7901e-13	0.34635	0.28748	0	0.334068	0.293311	3.7901e-13	0.316228
EX_ocdca(e)		1	1	1	0.987656	1	0.764569	0.680027	0.848627	0.598473	0.594647	0.909091	1	1	0.580073	0.909091	1	0.540185	0.879473	1	0.5		0	0	0	0.0328701	0	0.345435	0.358354	0.311613	0.350697	0.350265	0.28748	3.7901e-13	3.7901e-13	0.34635	0.28748	0	0.334068	0.293311	3.7901e-13	0.316228
EX_ocdcea(e)		1	1	1	0.987656	1	0.764569	0.680027	0.848627	0.598473	0.594647	0.909091	1	1	0.580073	0.909091	1	0.540185	0.879473	1	0.5		0	0	0	0.0328701	0	0.345435	0.358354	0.311613	0.350697	0.350265	0.28748	3.7901e-13	3.7901e-13	0.34635	0.28748	0	0.334068	0.293311	3.7901e-13	0.316228
EX_octa(e)		1	1	1	0.987656	1	0.764569	0.680027	0.848627	0.598473	0.594647	0.909091	1	1	0.580073	0.909091	1	0.540185	0.879473	1	0.5		0	0	0	0.0328701	0	0.345435	0.358354	0.311613	0.350697	0.350265	0.28748	3.7901e-13	3.7901e-13	0.34635	0.28748	0	0.334068	0.293311	3.7901e-13	0.316228
EX_oh1		1	1	1	0.987656	1	0.764569	0.680027	0.848627	0.598473	0.594647	0.909091	1	1	0.580073	0.909091	1	0.540185	0.879473	1	0.5		0	0	0	0.0328701	0	0.345435	0.358354	0.311613	0.350697	0.350265	0.28748	3.7901e-13	3.7901e-13	0.34635	0.28748	0	0.334068	0.293311	3.7901e-13	0.316228
EX_onpthl(e)		1	1	1	0.987656	1	0.764569	0.680027	0.848627	0.598473	0.594647	0.909091	1	1	0.580073	0.909091	1	0.540185	0.879473	1	0.5		0	0	0	0.0328701	0	0.345435	0.358354	0.311613	0.350697	0.350265	0.28748	3.7901e-13	3.7901e-13	0.34635	0.28748	0	0.334068	0.293311	3.7901e-13	0.316228
EX_orn(e)		1	1	1	0.987656	1	0.764569	0.680027	0.848627	0.598473	0.594647	0.909091	1	1	0.580073	0.909091	1	0.540185	0.879473	1	0.5		0	0	0	0.0328701	0	0.345435	0.358354	0.311613	0.350697	0.350265	0.28748	3.7901e-13	3.7901e-13	0.34635	0.28748	0	0.334068	0.293311	3.7901e-13	0.316228
EX_oxa(e)		1	1	1	0.987656	1	0.764569	0.680027	0.848627	0.598473	0.594647	0.909091	1	1	0.580073	0.909091	1	0.540185	0.879473	1	0.5		0	0	0	0.0328701	0	0.345435	0.358354	0.311613	0.350697	0.350265	0.28748	3.7901e-13	3.7901e-13	0.34635	0.28748	0	0.334068	0.293311	3.7901e-13	0.316228
EX_paf_hs(e)		1	1	1	0.987656	1	0.764569	0.680027	0.848627	0.598473	0.594647	0.909091	1	1	0.580073	0.909091	1	0.540185	0.879473	1	0.5		0	0	0	0.0328701	0	0.345435	0.358354	0.311613	0.350697	0.350265	0.28748	3.7901e-13	3.7901e-13	0.34635	0.28748	0	0.334068	0.293311	3.7901e-13	0.316228
EX_pchol_hs(e)		1	1	1	0.987656	1	0.764569	0.680027	0.848627	0.598473	0.594647	0.909091	0.970559	0.954736	0.580073	0.909091	1	0.540185	0.879473	0.954545	0.5		0	0	0	0.0328701	0	0.345435	0.358354	0.311613	0.350697	0.350265	0.28748	0.0931022	0.143137	0.34635	0.28748	0	0.334068	0.293311	0.14374	0.316228
EX_pe_hs(e)		1	1	1	0.987656	1	0.764569	0.680027	0.848627	0.598473	0.594647	0.909091	0.968919	0.964669	0.580073	0.909091	1	0.540185	0.879473	0.958725	0.5		0	0	0	0.0328701	0	0.345435	0.358354	0.311613	0.350697	0.350265	0.28748	0.0982857	0.111727	0.34635	0.28748	0	0.334068	0.293311	0.130523	0.316228
EX_peplys(e)		1	1	1	0.987656	1	0.764569	0.680027	0.848627	0.598473	0.594647	0.909091	1	1	0.580073	0.909091	1	0.540185	0.879473	1	0.5		0	0	0	0.0328701	0	0.345435	0.358354	0.311613	0.350697	0.350265	0.28748	3.7901e-13	3.7901e-13	0.34635	0.28748	0	0.334068	0.293311	3.7901e-13	0.316228
EX_pglyc_hs(e)		1	1	1	0.987656	1	0.764569	0.680027	0.848627	0.598473	0.594647	0.909091	0.965991	0.960107	0.580073	0.909091	1	0.540185	0.879473	0.959824	0.5		0	0	0	0.0328701	0	0.345435	0.358354	0.311613	0.350697	0.350265	0.28748	0.107545	0.126154	0.34635	0.28748	0	0.334068	0.293311	0.127049	0.316228
EX_phe-L(e)		1	1	0.961607	0.987656	1	0.764569	0.680027	0.81919	0.598473	0.594647	0.861416	0.954545	0.954545	0.580073	0.909091	1	0.540185	0.878236	0.954545	0.5		0	0	0.0636172	0.0328701	0	0.345435	0.358354	0.320104	0.350697	0.350265	0.281376	0.14374	0.14374	0.34635	0.28748	0	0.334068	0.294202	0.14374	0.316228
EX_pheme(e)		1	1	1	0.987656	1	0.764569	0.680027	0.848627	0.598473	0.594647	0.909091	1	1	0.580073	0.909091	1	0.540185	0.879473	1	0.5		0	0	0	0.0328701	0	0.345435	0.358354	0.311613	0.350697	0.350265	0.28748	3.7901e-13	3.7901e-13	0.34635	0.28748	0	0.334068	0.293311	3.7901e-13	0.316228
EX_phyQ(e)		1	1	1	0.987656	1	0.764569	0.680027	0.848627	0.598473	0.594647	0.909091	1	1	0.580073	0.909091	1	0.540185	0.879473	1	0.5		0	0	0	0.0328701	0	0.345435	0.358354	0.311613	0.350697	0.350265	0.28748	3.7901e-13	3.7901e-13	0.34635	0.28748	0	0.334068	0.293311	3.7901e-13	0.316228
EX_phyt(e)		1	1	1	0.987656	1	0.764569	0.680027	0.848627	0.598473	0.594647	0.909091	1	1	0.580073	0.909091	1	0.540185	0.879473	1	0.5		0	0	0	0.0328701	0	0.345435	0.358354	0.311613	0.350697	0.350265	0.28748	3.7901e-13	3.7901e-13	0.34635	0.28748	0	0.334068	0.293311	3.7901e-13	0.316228
EX_pi(e)		0.97205	0.97205	0.906568	0.945596	0.97205	0.743083	0.640255	0.780966	0.545459	0.587024	0.807048	0.929136	0.929136	0.526061	0.883682	0.97205	0.53563	0.848775	0.929136	0.497459		1.32985e-13	0	0.0801917	0.0518604	2.39771e-13	0.335794	0.346876	0.312048	0.328141	0.341556	0.268577	0.135705	0.135705	0.321602	0.279445	1.14837e-13	0.327954	0.290008	0.135705	0.312288
EX_pnto-R(e)		1	1	1	0.987656	1	0.764569	0.680027	0.848627	0.598473	0.594647	0.909091	1	1	0.580073	0.909091	1	0.540185	0.879473	1	0.5		0	0	0	0.0328701	0	0.345435	0.358354	0.311613	0.350697	0.350265	0.28748	3.7901e-13	3.7901e-13	0.34635	0.28748	0	0.334068	0.293311	3.7901e-13	0.316228
EX_ppa(e)		1	1	1	0.987656	1	0.764569	0.680027	0.848627	0.598473	0.594647	0.909091	1	1	0.580073	0.909091	1	0.540185	0.879473	1	0.5		0	0	0	0.0328701	0	0.345435	0.358354	0.311613	0.350697	0.350265	0.28748	3.7901e-13	3.7901e-13	0.34635	0.28748	0	0.334068	0.293311	3.7901e-13	0.316228
EX_prgstrn(e)		1	1	1	0.987656	1	0.764569	0.680027	0.848627	0.598473	0.594647	0.909091	1	1	0.580073	0.909091	1	0.540185	0.879473	1	0.5		0	0	0	0.0328701	0	0.345435	0.358354	0.311613	0.350697	0.350265	0.28748	3.7901e-13	3.7901e-13	0.34635	0.28748	0	0.334068	0.293311	3.7901e-13	0.316228
EX_pro-D(e)		1	1	1	0.987656	1	0.764569	0.680027	0.848627	0.598473	0.594647	0.909091	1	1	0.580073	0.909091	1	0.540185	0.879473	1	0.5		0	0	0	0.0328701	0	0.345435	0.358354	0.311613	0.350697	0.350265	0.28748	3.7901e-13	3.7901e-13	0.34635	0.28748	0	0.334068	0.293311	3.7901e-13	0.316228
EX_pro-L(e)		1	1	1	0.987656	1	0.764569	0.680027	0.815713	0.590283	0.594647	0.909091	0.954545	0.954545	0.571045	0.909091	1	0.540185	0.876902	0.954545	0.5		0	0	0	0.0328701	0	0.345435	0.358354	0.32077	0.348784	0.350265	0.28748	0.14374	0.14374	0.343571	0.28748	0	0.334068	0.295217	0.14374	0.316228
EX_prostgd2(e)		1	1	1	0.987656	1	0.764569	0.680027	0.848627	0.598473	0.594647	0.909091	1	1	0.580073	0.909091	1	0.540185	0.879473	1	0.5		0	0	0	0.0328701	0	0.345435	0.358354	0.311613	0.350697	0.350265	0.28748	3.7901e-13	3.7901e-13	0.34635	0.28748	0	0.334068	0.293311	3.7901e-13	0.316228
EX_prostge1(e)		1	1	1	0.987656	1	0.764569	0.680027	0.848627	0.598473	0.594647	0.909091	1	1	0.580073	0.909091	1	0.540185	0.879473	1	0.5		0	0	0	0.0328701	0	0.345435	0.358354	0.311613	0.350697	0.350265	0.28748	3.7901e-13	3.7901e-13	0.34635	0.28748	0	0.334068	0.293311	3.7901e-13	0.316228
EX_prostge2(e)		1	1	1	0.987656	1	0.764569	0.680027	0.848627	0.598473	0.594647	0.909091	1	1	0.580073	0.909091	1	0.540185	0.879473	1	0.5		0	0	0	0.0328701	0	0.345435	0.358354	0.311613	0.350697	0.350265	0.28748	3.7901e-13	3.7901e-13	0.34635	0.28748	0	0.334068	0.293311	3.7901e-13	0.316228
EX_prostgf2(e)		1	1	1	0.987656	1	0.764569	0.680027	0.848627	0.598473	0.594647	0.909091	1	1	0.580073	0.909091	1	0.540185	0.879473	1	0.5		0	0	0	0.0328701	0	0.345435	0.358354	0.311613	0.350697	0.350265	0.28748	3.7901e-13	3.7901e-13	0.34635	0.28748	0	0.334068	0.293311	3.7901e-13	0.316228
EX_ps_hs(e)		1	1	1	0.987656	1	0.764569	0.680027	0.848627	0.598473	0.594647	0.909091	0.972564	0.96267	0.580073	0.909091	1	0.540185	0.879473	0.961005	0.5		0	0	0	0.0328701	0	0.345435	0.358354	0.311613	0.350697	0.350265	0.28748	0.08676	0.118048	0.34635	0.28748	0	0.334068	0.293311	0.123312	0.316228
EX_ptdca(e)		1	1	1	0.987656	1	0.764569	0.680027	0.848627	0.598473	0.594647	0.909091	1	1	0.580073	0.909091	1	0.540185	0.879473	1	0.5		0	0	0	0.0328701	0	0.345435	0.358354	0.311613	0.350697	0.350265	0.28748	3.7901e-13	3.7901e-13	0.34635	0.28748	0	0.334068	0.293311	3.7901e-13	0.316228
EX_pydam(e)		1	1	1	0.987656	1	0.764569	0.680027	0.848627	0.598473	0.594647	0.909091	1	1	0.580073	0.909091	1	0.540185	0.879473	1	0.5		0	0	0	0.0328701	0	0.345435	0.358354	0.311613	0.350697	0.350265	0.28748	3.7901e-13	3.7901e-13	0.34635	0.28748	0	0.334068	0.293311	3.7901e-13	0.316228
EX_pydx(e)		1	1	1	0.987656	1	0.764569	0.680027	0.848627	0.598473	0.594647	0.909091	1	1	0.580073	0.909091	1	0.540185	0.879473	1	0.5		0	0	0	0.0328701	0	0.345435	0.358354	0.311613	0.350697	0.350265	0.28748	3.7901e-13	3.7901e-13	0.34635	0.28748	0	0.334068	0.293311	3.7901e-13	0.316228
EX_pydxn(e)		1	1	1	0.987656	1	0.764569	0.680027	0.848627	0.598473	0.594647	0.909091	1	1	0.580073	0.909091	1	0.540185	0.879473	1	0.5		0	0	0	0.0328701	0	0.345435	0.358354	0.311613	0.350697	0.350265	0.28748	3.7901e-13	3.7901e-13	0.34635	0.28748	0	0.334068	0.293311	3.7901e-13	0.316228
EX_pyr(e)		1	1	1	0.987656	1	0.764569	0.680027	0.848627	0.598473	0.594647	0.909091	0.954545	0.954545	0.580073	0.909091	1	0.540185	0.879473	0.954545	0.5		0	0	0	0.0328701	0	0.345435	0.358354	0.311613	0.350697	0.350265	0.28748	0.14374	0.14374	0.34635	0.28748	0	0.334068	0.293311	0.14374	0.316228
EX_retfa(e)		1	1	1	0.987656	1	0.764569	0.680027	0.848627	0.598473	0.594647	0.909091	1	1	0.580073	0.909091	1	0.540185	0.879473	1	0.5		0	0	0	0.0328701	0	0.345435	0.358354	0.311613	0.350697	0.350265	0.28748	3.7901e-13	3.7901e-13	0.34635	0.28748	0	0.334068	0.293311	3.7901e-13	0.316228
EX_retinol(e)		1	1	1	0.987656	1	0.764569	0.680027	0.848627	0.598473	0.594647	0.909091	1	1	0.580073	0.909091	1	0.540185	0.879473	1	0.5		0	0	0	0.0328701	0	0.345435	0.358354	0.311613	0.350697	0.350265	0.28748	3.7901e-13	3.7901e-13	0.34635	0.28748	0	0.334068	0.293311	3.7901e-13	0.316228
EX_retinol-9-cis(e)		1	1	1	0.987656	1	0.764569	0.680027	0.848627	0.598473	0.594647	0.909091	1	1	0.580073	0.909091	1	0.540185	0.879473	1	0.5		0	0	0	0.0328701	0	0.345435	0.358354	0.311613	0.350697	0.350265	0.28748	3.7901e-13	3.7901e-13	0.34635	0.28748	0	0.334068	0.293311	3.7901e-13	0.316228
EX_retinol-cis-11(e)		1	1	1	0.987656	1	0.764569	0.680027	0.848627	0.598473	0.594647	0.909091	1	1	0.580073	0.909091	1	0.540185	0.879473	1	0.5		0	0	0	0.0328701	0	0.345435	0.358354	0.311613	0.350697	0.350265	0.28748	3.7901e-13	3.7901e-13	0.34635	0.28748	0	0.334068	0.293311	3.7901e-13	0.316228
EX_retn(e)		1	1	1	0.987656	1	0.764569	0.680027	0.848627	0.598473	0.594647	0.909091	1	1	0.580073	0.909091	1	0.540185	0.879473	1	0.5		0	0	0	0.0328701	0	0.345435	0.358354	0.311613	0.350697	0.350265	0.28748	3.7901e-13	3.7901e-13	0.34635	0.28748	0	0.334068	0.293311	3.7901e-13	0.316228
EX_retnglc(e)		1	1	1	0.987656	1	0.764569	0.680027	0.848627	0.598473	0.594647	0.909091	1	1	0.580073	0.909091	1	0.540185	0.879473	1	0.5		0	0	0	0.0328701	0	0.345435	0.358354	0.311613	0.350697	0.350265	0.28748	3.7901e-13	3.7901e-13	0.34635	0.28748	0	0.334068	0.293311	3.7901e-13	0.316228
EX_retpalm(e)		1	1	1	0.987656	1	0.764569	0.680027	0.848627	0.598473	0.594647	0.909091	1	1	0.580073	0.909091	1	0.540185	0.879473	1	0.5		0	0	0	0.0328701	0	0.345435	0.358354	0.311613	0.350697	0.350265	0.28748	3.7901e-13	3.7901e-13	0.34635	0.28748	0	0.334068	0.293311	3.7901e-13	0.316228
EX_rib-D(e)		1	1	1	0.987656	1	0.764569	0.680027	0.848627	0.598473	0.594647	0.909091	1	1	0.580073	0.909091	1	0.540185	0.879473	1	0.5		0	0	0	0.0328701	0	0.345435	0.358354	0.311613	0.350697	0.350265	0.28748	3.7901e-13	3.7901e-13	0.34635	0.28748	0	0.334068	0.293311	3.7901e-13	0.316228
EX_ribflv(e)		1	1	1	0.987656	1	0.764569	0.680027	0.848627	0.598473	0.594647	0.909091	1	1	0.580073	0.909091	1	0.540185	0.879473	1	0.5		0	0	0	0.0328701	0	0.345435	0.358354	0.311613	0.350697	0.350265	0.28748	3.7901e-13	3.7901e-13	0.34635	0.28748	0	0.334068	0.293311	3.7901e-13	0.316228
EX_s2l2fn2m2masn(e)		1	1	1	0.987656	1	0.764569	0.680027	0.848627	0.598473	0.594647	0.909091	1	1	0.580073	0.909091	1	0.540185	0.879473	1	0.5		0	0	0	0.0328701	0	0.345435	0.358354	0.311613	0.350697	0.350265	0.28748	3.7901e-13	3.7901e-13	0.34635	0.28748	0	0.334068	0.293311	3.7901e-13	0.316228
EX_s2l2n2m2masn(e)		1	1	1	0.987656	1	0.764569	0.680027	0.848627	0.598473	0.594647	0.909091	1	1	0.580073	0.909091	1	0.540185	0.879473	1	0.5		0	0	0	0.0328701	0	0.345435	0.358354	0.311613	0.350697	0.350265	0.28748	3.7901e-13	3.7901e-13	0.34635	0.28748	0	0.334068	0.293311	3.7901e-13	0.316228
EX_sarcs(e)		1	1	1	0.987656	1	0.764569	0.680027	0.848627	0.598473	0.594647	0.909091	1	1	0.580073	0.909091	1	0.540185	0.879473	1	0.5		0	0	0	0.0328701	0	0.345435	0.358354	0.311613	0.350697	0.350265	0.28748	3.7901e-13	3.7901e-13	0.34635	0.28748	0	0.334068	0.293311	3.7901e-13	0.316228
EX_sel(e)		1	1	1	0.987656	1	0.764569	0.680027	0.848627	0.598473	0.594647	0.909091	1	1	0.580073	0.909091	1	0.540185	0.879473	1	0.5		0	0	0	0.0328701	0	0.345435	0.358354	0.311613	0.350697	0.350265	0.28748	3.7901e-13	3.7901e-13	0.34635	0.28748	0	0.334068	0.293311	3.7901e-13	0.316228
EX_ser-D(e)		1	1	1	0.987656	1	0.764569	0.680027	0.848627	0.598473	0.594647	0.909091	1	1	0.580073	0.909091	1	0.540185	0.879473	1	0.5		0	0	0	0.0328701	0	0.345435	0.358354	0.311613	0.350697	0.350265	0.28748	3.7901e-13	3.7901e-13	0.34635	0.28748	0	0.334068	0.293311	3.7901e-13	0.316228
EX_ser-L(e)		1	1	1	0.987656	1	0.764569	0.680027	0.815713	0.590283	0.594647	0.909091	0.954545	0.954545	0.571045	0.909091	1	0.540185	0.876902	0.954545	0.5		0	0	0	0.0328701	0	0.345435	0.358354	0.32077	0.348784	0.350265	0.28748	0.14374	0.14374	0.343571	0.28748	0	0.334068	0.295217	0.14374	0.316228
EX_sl-L(e)		1	1	1	0.987656	1	0.764569	0.680027	0.848627	0.598473	0.594647	0.909091	1	1	0.580073	0.909091	1	0.540185	0.879473	1	0.5		0	0	0	0.0328701	0	0.345435	0.358354	0.311613	0.350697	0.350265	0.28748	3.7901e-13	3.7901e-13	0.34635	0.28748	0	0.334068	0.293311	3.7901e-13	0.316228
[truncated: 2,017 more rows]

## Sheet: DENV
IAB-AMØ-1410 Metabolic Model		Mean of constrained DENV optima (% unconstrained CHIKV optima) results for in silico media metabolite alterations, through additional constraints on metabolite-associated exchange reactions																					Standard deviation of constrained DENV optima (% unconstrained CHIKV optima) results for in silico media metabolite alterations, through additional constraints on metabolite-associated exchange reactions
[truncated: 3,395 more rows]

[truncated: 1 more sheets: ZIKV]
